# Supplementary material for: Low expression of the metabolism-related gene SLC25A21 predicts unfavourable prognosis in patients with acute myeloid leukaemia
Source: Front Genet. 2022 Sep 30;13:970316. doi: 10.3389/fgene.2022.970316 (PMC9562002; doi:10.3389/fgene.2022.970316)
Supplement: Supplementary file 2 [file Table2.XLSX]

## Sheet: Sheet 1
ONTOLOGY	ID	Description	GeneRatio	BgRatio	pvalue	p.adjust	qvalue	geneID	Count
CC	GO:0062023	collagen-containing extracellular matrix	89/1188	406/19717	3.54412e-27	1.74016e-24	1.33558e-24	A2M/ACHE/APOE/AZGP1/BGN/COL1A1/COL1A2/COL2A1/COL3A1/COL4A1/COL4A2/COL5A1/COL6A3/COL8A1/COL9A2/COL11A1/COL12A1/COL15A1/COL16A1/COL19A1/CCN2/DCN/FBLN1/EFEMP1/FGF9/GPC5/FMOD/TNC/IL7/KRT1/LAMA4/LGALS1/LTBP2/LUM/MATN3/MGP/MMP8/MMP9/ORM1/PDGFB/VIT/PRELP/PRSS1/HTRA1/PTN/PZP/S100A10/SDC2/CXCL12/SFRP1/SFRP2/TIMP3/TNXB/WNT5A/SPARCL1/SRPX/ADAM19/ADIPOQ/ADAMTS4/ADAMTS2/GPC6/PRG3/SPON1/POSTN/SULF1/ANGPTL2/MXR…	89
BP	GO:0043062	extracellular structure organization	82/1133	422/18670	2.34873e-21	1.2352e-17	9.29601e-18	A2M/AGTR1/APOB/APOC1/APOE/BGN/CDH1/COL1A1/COL1A2/COL2A1/COL3A1/COL4A1/COL4A2/COL5A1/COL6A3/COL8A1/COL9A2/COL11A1/COL12A1/COL15A1/COL16A1/COL19A1/CCN2/DCN/FAP/FBLN1/FOXF2/FOXC1/FMOD/TNC/IBSP/KDR/KLKB1/LAMA4/LUM/MATN3/MMP7/MMP8/MMP9/MMP13/MMP19/DDR2/PDGFB/PDGFRA/VIT/PLOD2/PRSS1/PRSS2/HTRA1/PTK2/SDC1/SFRP2/SOX9/TLL1/TLL2/TNXB/VCAM1/ITGA8/ADAM19/LIPG/ADAMTS4/ADAMTS2/RAMP2/PDPN/POSTN/SULF1/FLRT2/EGFL6…	82
BP	GO:0050808	synapse organization	79/1133	408/18670	1.63392e-20	2.86426e-17	2.15563e-17	ASIC2/ACHE/ADD2/APOE/ADGRB3/CDH1/CDH8/CDH9/COL4A1/DGKB/DLG3/CTTN/EPHA4/EPHA7/EPHB1/ERBB4/GABRA2/GABRB2/GABRB3/GABRG2/GDNF/GHSR/TNC/IL10/NEFL/NFIA/NFATC4/NTRK2/NTRK3/PCDH8/LGMN/RELN/PTK2/PTN/PTPRD/PTPRS/ROBO2/CX3CL1/SIX1/WNT5A/WNT7B/SPARCL1/PPFIA2/KALRN/NOS1AP/WASF3/C1QL1/NLGN4Y/NLGN1/ZNF365/ARHGEF15/SHANK2/DKK1/PDZRN3/FLRT3/FLRT2/SLITRK5/PCDHB5/PCDH17/PCLO/SIX4/CNTN5/SYBU/PCDHB6/PCDHB4/LRFN2/NLGN…	79
BP	GO:0030198	extracellular matrix organization	75/1133	368/18670	6.79494e-21	1.78673e-17	1.34468e-17	A2M/BGN/CDH1/COL1A1/COL1A2/COL2A1/COL3A1/COL4A1/COL4A2/COL5A1/COL6A3/COL8A1/COL9A2/COL11A1/COL12A1/COL15A1/COL16A1/COL19A1/CCN2/DCN/FAP/FBLN1/FOXF2/FOXC1/FMOD/TNC/IBSP/KDR/KLKB1/LAMA4/LUM/MATN3/MMP7/MMP8/MMP9/MMP13/MMP19/DDR2/PDGFB/PDGFRA/VIT/PLOD2/PRSS1/PRSS2/HTRA1/PTK2/SFRP2/SOX9/TLL1/TLL2/TNXB/VCAM1/ITGA8/ADAM19/ADAMTS4/ADAMTS2/RAMP2/PDPN/POSTN/SULF1/FLRT2/EGFL6/COL5A3/ADAMTS9/HPSE2/MMP27/SMOC…	75
MF	GO:0048018	receptor ligand activity	71/1117	482/17697	1.73441e-11	2.67932e-09	2.17752e-09	FASLG/BMP3/BMP4/BMP5/CD40LG/CRH/CCN2/EDN3/EPHA7/EFEMP1/FGF9/FGF12/FGF13/FGF14/GDF2/GDNF/IFNG/IGF2/IL2/IL7/IL10/INHBB/CXCL9/NPY/PDGFB/PTN/CCL1/CCL8/CCL14/CCL16/CCL18/CCL23/XCL1/CX3CL1/CXCL12/SFRP2/STC1/XCL2/TSHB/VEGFC/WNT5A/WNT7B/STC2/KL/ADIPOQ/NRG2/CXCL14/INSL5/EBI3/SEMA3C/NRG3/UTS2/DKK1/FLRT3/FLRT2/TAFA5/IL36A/IL22/GAL/SEMA5B/IL26/GREM2/SEMA6D/WNT10A/SPX/TSLP/IL33/IL34/ERFE/UTS2B/C17orf99	71
BP	GO:0007389	pattern specification process	70/1133	446/18670	1.89585e-13	1.66171e-10	1.25059e-10	ASCL1/NKX3-2/BMP4/BMP5/ERBB4/FOXC1/GDNF/GJA1/GLI2/FOXA1/HOXA3/HOXA4/HOXA5/HOXA7/HOXA9/HOXA10/HOXA11/HOXB2/HOXB3/HOXB4/HOXB5/HOXB6/HOXB7/HOXB8/HOXC6/HOXD8/LMX1B/MLLT3/MYF6/ROR2/PBX1/PBX3/PCDH8/PITX2/RELN/ROBO1/ROBO2/SFRP1/SFRP2/SIX1/SOX1/STC1/TBX2/TBX3/NR2F2/WNT5A/WNT7B/CHRD/TBX18/SEMA3C/DLL3/NRG3/SIX2/DKK1/COBL/HEY1/HEY2/DAAM2/VAX2/SOSTDC1/ARMC4/CYP26B1/SOX17/GREM2/WLS/CXXC4/ACVR1C/IRX2/TDRD5/HES5	70
BP	GO:0048568	embryonic organ development	66/1133	428/18670	2.15505e-12	1.08739e-09	8.18361e-10	NKX3-2/BMP4/BMP5/COL2A1/COL11A1/DLX5/EGFR/EPHA2/EPAS1/EFEMP1/FGF9/FOXF2/FOXC1/FRZB/GDNF/GJA1/GJA5/GLI2/HOXA3/HOXA4/HOXA5/HOXA7/HOXA11/HOXB2/HOXB3/HOXB4/HOXB5/HOXB6/HOXB7/HOXB8/ID3/IGF2/IL10/KDR/ROR2/PBX1/PDGFB/PDGFRA/PRRX1/RYR2/SIX1/SOX9/TAL1/TBX2/TBX3/NR2F2/PHLDA2/TWIST1/CLRN1/WNT5A/WNT7B/ITGA8/YAP1/SIX2/GJB6/COBL/ZFPM2/HEY1/HEY2/VAX2/SIX4/SOX17/RSPO3/PKDCC/OSR2/LRIG3	66
BP	GO:0048732	gland development	64/1133	434/18670	3.38978e-11	1.18846e-08	8.94427e-09	ARG1/ASCL1/ASS1/CEACAM1/BMP4/CAV1/CDH1/CDO1/CPS1/CRH/EDA/EGFR/EPHA2/ERBB4/FOXC1/FRZB/GJA1/GLI2/FOXA1/HOXA3/HOXA5/HOXA9/HOXB3/IGSF3/TNC/ID4/IGF2/IGFBP5/IL10/IRF6/MET/NFIB/PBX1/PCK1/PDGFRA/PGR/PITX2/PLAG1/PTN/ROBO1/SFRP1/SIX1/SNAI2/SOX9/TBX2/TBX3/PRDX2/TGFBR3/THRB/WNT5A/WNT7B/KALRN/SEMA3C/NRG3/SULF1/COBL/SOSTDC1/TFCP2L1/SIX4/BCL11B/FA2H/WLS/WNT10A/NKX2-3	64
BP	GO:0010975	regulation of neuron projection development	64/1133	499/18670	1.0817e-08	1.42217e-06	1.07031e-06	APOE/ADGRB3/BMP5/CNR1/DCC/DPYSL3/CTTN/EPHA3/EPHA4/EPHA7/FGF13/IL2/KEL/LGALS1/MAP2/MARK1/NEFL/NFATC4/NGFR/NTRK2/NTRK3/PRKN/PRRX1/PRKD1/RELN/PTK2/PTN/PTPRD/PTPRG/PTPRS/ROBO1/ROBO2/CX3CL1/SDC2/CXCL12/SFRP1/SFRP2/SNAP25/SPOCK1/NR2F1/THY1/TRPC6/WNT5A/XK/FZD4/KALRN/SLIT2/OLFM1/SEMA3C/STMN2/NLGN1/ZNF365/SHANK2/DKK1/COBL/NEDD4L/PACSIN1/SEMA5B/LRRC4C/CPNE5/NDNF/SEMA6D/DAB2IP/SDK1	64
CC	GO:0097060	synaptic membrane	64/1188	432/19717	2.12335e-11	1.30321e-09	1.00021e-09	ADRA2C/ANK1/ANK2/CALB2/CDH8/CDH9/CDH10/CHRM3/CNR1/DCC/DLG3/EPHA4/EPHA7/ERBB4/GABRA2/GABRB2/GABRB3/GABRD/GABRE/GABRG2/GHSR/GRIA3/GRID1/GRIK4/GRM8/HTR1B/HTR2A/HTR3A/KCNA2/KCNA3/KCNJ3/NTRK3/PCDH8/PTPRS/SLC6A1/SLC6A2/SLC6A9/SNAP25/ITGA8/ADAM23/MPDZ/PLPPR4/NLGN4Y/NLGN1/RPH3A/SHANK2/SORCS3/FLRT3/CACNG4/PCDH17/CNTN5/TENM2/LRFN2/NLGN4X/LRRC4C/CADM3/CPEB1/TMEM108/IGSF21/CADPS2/SYT6/LRRTM3/RGS7BP/SHISA7	64
MF	GO:0050839	cell adhesion molecule binding	61/1117	499/17697	5.16078e-07	3.0891e-05	2.51055e-05	CALD1/CDH1/CDH5/CDH6/CDH8/CDH9/CDH10/CDH11/CDH15/CNN3/COL3A1/COL5A1/COL16A1/CCN2/DSP/EGFR/EPHA2/CTTN/FAP/IBSP/IGF2/KDR/PTN/PTPRB/PTPRD/CX3CL1/CXCL12/SFRP2/THY1/TJP1/TSPAN8/TNXB/VCAM1/H3C1/ADAM23/CCN5/CCN4/ITGBL1/NRXN3/OLFM4/POSTN/ESM1/NLGN4Y/COBLL1/NLGN1/DOCK9/EGFL6/TENM4/CTNNA3/DCHS2/PARVA/CD177/TENM2/NLGN4X/LRRC4C/CDH22/NECTIN4/HMCN1/IGSF21/PHLDB2/DAB2IP	61
BP	GO:0001503	ossification	61/1133	398/18670	1.94689e-11	8.53224e-09	6.42132e-09	ACHE/ALPL/BMP3/BMP4/BMP5/CDH11/COL1A1/COL1A2/COL2A1/COL11A1/CCN2/DLX5/EGFR/EPHA2/FGF9/FOXC1/GDF2/GJA1/GLI2/TNC/IBSP/ID3/ID4/IGF2/IGFBP3/IGFBP5/LTF/MGP/MMP13/ROR2/DDR2/PBX1/ENPP1/PHEX/PRKD1/PTK2/PTN/RORB/SORT1/SFRP1/SFRP2/SNAI2/SOX9/STC1/TWIST1/WNT5A/WNT7B/CHRD/CCN4/KL/SIX2/DKK1/WWTR1/LGR4/TP53INP2/SMOC1/FAT4/PKDCC/OSR2/TMEM119/RSPO2	61
BP	GO:0003002	regionalization	60/1133	351/18670	2.47602e-13	1.8602e-10	1.39997e-10	ASCL1/BMP4/FOXC1/GDNF/GLI2/FOXA1/HOXA3/HOXA4/HOXA5/HOXA7/HOXA9/HOXA10/HOXA11/HOXB2/HOXB3/HOXB4/HOXB5/HOXB6/HOXB7/HOXB8/HOXC6/HOXD8/LMX1B/MLLT3/MYF6/ROR2/PBX1/PBX3/PCDH8/PITX2/RELN/ROBO1/ROBO2/SFRP1/SFRP2/SIX1/SOX1/TBX3/NR2F2/WNT5A/WNT7B/CHRD/TBX18/SEMA3C/DLL3/SIX2/DKK1/COBL/HEY1/HEY2/VAX2/SOSTDC1/CYP26B1/SOX17/GREM2/WLS/CXXC4/IRX2/TDRD5/HES5	60
BP	GO:0048608	reproductive structure development	60/1133	431/18670	1.40987e-09	2.74612e-07	2.06672e-07	BMP4/BMP5/DCN/EGFR/EPAS1/EPOR/FGF9/FOXF2/FOXC1/GHSR/GJA1/GJB2/GLI2/FOXA1/HOXA9/HOXA10/HOXA11/TNC/ID4/IGF2/IL10/INHBB/MME/MMP19/ROR2/PDGFB/PDGFRA/PGR/PLAG1/HTRA1/PTGIS/PTK2/PTN/ROBO2/SDC1/SFRP1/SFRP2/SLIT3/SOX9/STC1/TBX3/NR2F2/PHLDA2/WNT5A/WNT7B/FZD4/UTF1/STC2/ADAM19/SLIT2/PCYT1B/SYCP2/SULF1/ZFPM2/HEY1/HEY2/SIX4/LGR4/RSPO3/CCDC182	60
BP	GO:0061458	reproductive system development	60/1133	434/18670	1.84777e-09	3.35716e-07	2.52658e-07	BMP4/BMP5/DCN/EGFR/EPAS1/EPOR/FGF9/FOXF2/FOXC1/GHSR/GJA1/GJB2/GLI2/FOXA1/HOXA9/HOXA10/HOXA11/TNC/ID4/IGF2/IL10/INHBB/MME/MMP19/ROR2/PDGFB/PDGFRA/PGR/PLAG1/HTRA1/PTGIS/PTK2/PTN/ROBO2/SDC1/SFRP1/SFRP2/SLIT3/SOX9/STC1/TBX3/NR2F2/PHLDA2/WNT5A/WNT7B/FZD4/UTF1/STC2/ADAM19/SLIT2/PCYT1B/SYCP2/SULF1/ZFPM2/HEY1/HEY2/SIX4/LGR4/RSPO3/CCDC182	60
BP	GO:0007409	axonogenesis	60/1133	468/18670	3.17614e-08	2.86481e-06	2.15604e-06	APOE/CDH11/DCC/DLX5/EPHA2/CTTN/EPHA3/EPHA4/EPHA7/EPHB1/ETV1/FGF13/GDNF/GFRA1/GFRA3/GLI2/KEL/KIF5A/MAP2/NEFL/NEO1/NFIB/NGFR/NTRK2/NTRK3/RELN/PTK2/PTPRS/RAP1GAP/ROBO1/ROBO2/CXCL12/SLIT3/SPTA1/SPTB/THY1/UCHL1/WNT5A/XK/UNC5C/DCLK1/SLIT2/NRXN3/PLPPR4/OLFM1/SEMA3C/CHL1/COBL/FLRT3/FLRT2/VAX2/TSKU/SLITRK5/SEMA5B/ENAH/LRRC4C/BCL11B/SEMA6D/DOK6/EPHA10	60
CC	GO:0005911	cell-cell junction	59/1188	459/19717	3.00467e-08	9.22058e-07	7.07678e-07	ANK2/CEACAM1/CALB2/CDH1/CDH5/CDH6/CDH8/CDH9/CDH10/CDH11/CDH15/CNN3/DLG3/DSC1/DSP/EPHA2/FAT1/FGF13/GJA1/GJA5/GJB2/ITK/KCNA2/KCNA5/KCNJ11/PCDH1/PTPRK/TJP1/TRPC6/FZD4/CDC42BPA/MPDZ/MAGI1/PATJ/GJB6/EPB41L3/FLRT3/FLRT2/CNTNAP2/CTNNA3/AMOTL2/EPB41L4B/RASIP1/AJAP1/CADM3/PERP/CDH22/POF1B/NECTIN4/EPPK1/TMEM47/HMCN1/IGSF21/OPALIN/PARD3B/FRMD6/FRMPD2/THEMIS/OCLN	59
MF	GO:0046873	metal ion transmembrane transporter activity	58/1117	438/17697	6.51692e-08	4.55098e-06	3.69864e-06	ASIC2/ATP1A4/ATP1B2/CACNA1E/CACNA2D1/CNR1/GRIK4/HTR1B/KCNA2/KCNA3/KCNA5/KCNH2/KCNJ3/KCNJ11/KCNJ15/KCNK1/KCNN3/KCNQ3/RYR2/SCN3A/SCNN1B/SLC1A1/SLC6A1/SLC6A2/SLC6A8/SLC6A9/SLC10A2/SLC12A3/SLC22A3/SNAP25/ABCC8/TF/TRPC1/TRPC3/TRPC6/SLC30A4/TUSC3/SLC4A4/CACNA1I/TRPA1/TSPOAP1/ABCC9/SLC17A2/SLC17A3/CACNG4/MCOLN3/ASIC4/SLC30A10/JPH1/KCNK15/LRRC38/SLC5A12/SLC30A8/MCOLN2/SLC6A19/KCNT2/NIPAL4/KCNE1B	58
BP	GO:0042391	regulation of membrane potential	58/1133	434/18670	1.21341e-08	1.55643e-06	1.17136e-06	ASIC2/ADRB1/ANK2/ATP1A4/ATP1B2/CACNA1E/CACNA2D1/CAV1/CNR1/DCN/DSP/FGF12/FGF13/FGF14/GABRA2/GABRB2/GABRB3/GABRD/GABRE/GABRG2/GJA1/GJA5/GRIA3/GRID1/GRIK4/HTR3A/KCNA2/KCNA5/KCNH2/KCNJ3/KCNJ11/KCNK1/KCNQ3/KDR/NTRK2/NTRK3/PRKN/RELN/PTN/RYR2/SCN3A/TCL1A/CACNA1I/SLC25A27/NOS1AP/TRDN/NLGN1/SHANK2/NEDD4L/CACNG4/CTNNA3/PID1/NLGN4X/KCNK15/TMEM108/KCNT2/RGS7BP/KCNE1B	58
CC	GO:0098793	presynapse	58/1188	491/19717	7.07874e-07	1.44819e-05	1.11149e-05	ADRA2C/CALB2/CDH8/CDH9/CDH10/CHAT/CHRM3/CNR1/EPHA4/ERBB4/GABRA2/GAD1/GRIK4/GRM8/HTR1B/HTR2A/HTR3A/KCNA2/KCNA3/KCNJ3/MME/NEFL/NTRK2/ROR1/PRKN/PCDH8/PTN/PTPRS/RAB3B/SLC1A7/SLC6A1/SLC6A2/SLC6A9/SNAP25/SYN3/PPFIA2/ADAM23/TSPOAP1/CPLX1/CYP46A1/NMU/C1QL1/NLGN4Y/NLGN1/RPH3A/FLRT3/PCDH17/PCLO/PACSIN1/CNTN5/SEPTIN3/NLGN4X/CADM3/CTTNBP2/IGSF21/CADPS2/SYT6/RGS7BP	58
MF	GO:0015267	channel activity	57/1117	456/17697	5.91461e-07	3.3043e-05	2.68544e-05	ASIC2/CACNA1E/CACNA2D1/CLCA1/CLCN4/CNR1/GABRA2/GABRB2/GABRB3/GABRD/GABRE/GABRG2/GJA1/GJA5/GJB2/GRIA3/GRID1/GRIK4/HTR1B/HTR3A/KCNA2/KCNA3/KCNA5/KCNH2/KCNJ3/KCNJ11/KCNJ15/KCNK1/KCNN3/KCNQ3/RHAG/RYR2/SCN3A/SCNN1B/SNAP25/ABCC8/TRPC1/TRPC3/TRPC6/CACNA1I/TRPA1/TSPOAP1/ABCC9/SLC17A3/CACNG4/CLIC5/ANO1/MCOLN3/ASIC4/JPH1/TMEM63C/KCNK15/LRRC38/BEST3/MCOLN2/KCNT2/KCNE1B	57
MF	GO:0022803	passive transmembrane transporter activity	57/1117	457/17697	6.35469e-07	3.32827e-05	2.70492e-05	ASIC2/CACNA1E/CACNA2D1/CLCA1/CLCN4/CNR1/GABRA2/GABRB2/GABRB3/GABRD/GABRE/GABRG2/GJA1/GJA5/GJB2/GRIA3/GRID1/GRIK4/HTR1B/HTR3A/KCNA2/KCNA3/KCNA5/KCNH2/KCNJ3/KCNJ11/KCNJ15/KCNK1/KCNN3/KCNQ3/RHAG/RYR2/SCN3A/SCNN1B/SNAP25/ABCC8/TRPC1/TRPC3/TRPC6/CACNA1I/TRPA1/TSPOAP1/ABCC9/SLC17A3/CACNG4/CLIC5/ANO1/MCOLN3/ASIC4/JPH1/TMEM63C/KCNK15/LRRC38/BEST3/MCOLN2/KCNT2/KCNE1B	57
BP	GO:0034765	regulation of ion transmembrane transport	57/1133	483/18670	1.11746e-06	5.49228e-05	4.13346e-05	ASIC2/APLNR/ANK2/ANXA3/ATP1B2/CACNA1E/CACNA2D1/CAV1/CRH/DLG3/EDN3/FGF12/FGF14/GEM/GJA1/GJA5/GRIA3/HTR3A/IFNG/KCNA2/KCNA3/KCNA5/KCNH2/KCNJ3/KCNJ11/KCNJ15/KCNQ3/KEL/CXCL9/MMP9/NEFL/RELN/RYR2/SCN3A/XCL1/CX3CL1/STAC/THY1/TRPC1/TRPC6/TWIST1/CACNA1I/NOS1AP/TRDN/NLGN1/SHANK2/NEDD4L/CACNG4/GAL/CLIC5/JPH1/KCNK15/WNK2/LRRC38/PM20D1/SHISA7/KCNE1B	57
BP	GO:0050900	leukocyte migration	57/1133	499/18670	3.12381e-06	0.000120795	9.09095e-05	ADD2/APOB/APOD/ATP1B2/CEACAM1/BMP5/C3AR1/CAV1/CEACAM3/CEACAM8/COL1A1/COL1A2/EDN3/FLT1/GRB14/GYPA/GYPB/HOXA7/CXCR1/IL10/LBP/LCK/CXCL9/ROR2/OLR1/PDGFB/PROS1/LGMN/PTN/CCL1/CCL8/CCL14/CCL16/CCL18/CCL23/XCL1/CX3CL1/SDC1/SDC2/CXCL12/XCL2/THY1/VCAM1/VEGFC/VPREB1/WNT5A/SLIT2/CXCL14/PADI2/IL36A/SIRPG/SLC7A10/CD177/PLVAP/IL33/NKX2-3/MCOLN2	57
BP	GO:0050673	epithelial cell proliferation	56/1133	434/18670	7.35127e-08	6.13656e-06	4.61834e-06	AGTR1/APLNR/APOE/ARG1/CEACAM1/BMP4/BMP5/CAV1/COL8A1/DLX5/EGFR/EPHA2/FAP/FGF9/FLT1/GDF2/GHSR/GJA1/HOXA5/IGFBP3/IGFBP4/IGFBP5/IL10/IRF6/KDR/NFIB/NGFR/PDGFB/PGR/PRKD1/HTRA1/PTN/PTPRK/ROBO1/CXCL12/SFRP1/SFRP2/SIX1/SNAI2/SOX9/NR2F2/TGFBR3/TWIST1/VEGFC/WNT5A/YAP1/SULF1/SIX4/LGR4/IL26/BCL11B/EPPK1/OSR2/DAB2IP/BMPER/HES5	56
BP	GO:0050804	modulation of chemical synaptic transmission	56/1133	436/18670	8.60286e-08	6.85492e-06	5.15897e-06	ACHE/APOE/CALB2/CDH1/CDH11/CNR1/CRH/DGKB/DCC/EGFR/EPHA4/EPHB1/FGF14/GDNF/GHSR/GRID1/GRIK4/GRM8/HTR1B/HTR2A/MME/NFATC4/NTRK2/ROR2/PRKN/LGMN/RELN/PTN/PTPRS/RAB3B/CX3CL1/SLC6A1/SLC6A9/SNAP25/SYN3/PPFIA2/ADIPOQ/STXBP5L/AKAP12/NRG3/CPLX1/CYP46A1/NMU/NLGN4Y/NLGN1/SHANK2/DKK1/SORCS3/CACNG4/PCDH17/SYBU/LRFN2/NLGN4X/LRRC4C/TMEM108/SHISA7	56
BP	GO:0099177	regulation of trans-synaptic signaling	56/1133	437/18670	9.30172e-08	7.19378e-06	5.414e-06	ACHE/APOE/CALB2/CDH1/CDH11/CNR1/CRH/DGKB/DCC/EGFR/EPHA4/EPHB1/FGF14/GDNF/GHSR/GRID1/GRIK4/GRM8/HTR1B/HTR2A/MME/NFATC4/NTRK2/ROR2/PRKN/LGMN/RELN/PTN/PTPRS/RAB3B/CX3CL1/SLC6A1/SLC6A9/SNAP25/SYN3/PPFIA2/ADIPOQ/STXBP5L/AKAP12/NRG3/CPLX1/CYP46A1/NMU/NLGN4Y/NLGN1/SHANK2/DKK1/SORCS3/CACNG4/PCDH17/SYBU/LRFN2/NLGN4X/LRRC4C/TMEM108/SHISA7	56
BP	GO:0022604	regulation of cell morphogenesis	56/1133	484/18670	2.56952e-06	0.000101602	7.64652e-05	APOE/RND3/ADGRB3/DCC/CTTN/EPB42/DMTN/EPHA4/EPHA7/FBLN1/FGF13/KDR/KEL/MAP2/MYO10/NEFL/NFATC4/NGFR/NTRK2/NTRK3/PRKN/RELN/PTK2/PTN/PTPRD/PTPRS/ROBO1/ROBO2/S100A10/SDC2/CXCL12/SPTA1/THY1/TRPC6/WNT5A/XK/FZD4/KALRN/SLIT2/OLFM1/SEMA3C/OLFM4/PDPN/POSTN/WASF3/NLGN1/EPB41L3/NEDD4L/RHOD/SEMA5B/PALMD/PARVA/RHOJ/LRRC4C/CPNE5/SEMA6D	56
CC	GO:0098978	glutamatergic synapse	56/1188	349/19717	1.66301e-11	1.16648e-09	8.95273e-10	ADRA2C/APOE/CAMK4/CDH1/CDH8/CDH10/CDH11/CHRM3/CNR1/DGKB/DLG3/EPHA4/EPHA7/EPHB1/ERBB4/GABRD/GHSR/GRID1/HTR2A/HTR3A/KCNA3/NTRK3/PCDH8/PTPRD/PTPRS/SNAP25/WNT5A/SYN3/FZD4/SPARCL1/PPFIA2/ADAM23/TSPOAP1/NOS1AP/PLPPR4/GPC6/NRG3/WASF3/CPLX1/NLGN4Y/NLGN1/SORCS3/FLRT3/CACNG4/PCDH17/NLGN4X/LRRC4C/CAMKV/ARHGAP39/CTTNBP2/CADPS2/CBLN2/SYT6/LRRTM3/RGS7BP/SHISA7	56
CC	GO:0043025	neuronal cell body	56/1188	497/19717	4.74287e-06	7.5121e-05	5.76553e-05	ASIC2/ADRA2C/ANXA3/APOB/APOD/APOE/ARG1/ASCL1/ASS1/ASTN1/CNN3/CRH/DLG3/EEF1A2/EPHA4/EPHA7/HTR2A/HTR3A/KCNA2/KCNJ11/KCNK1/KCNN3/KIF5A/MAP2/MME/MYO1D/MYO10/ROR2/PDE1A/PRKAA2/PTPRK/PTPRS/PVALB/SORT1/CX3CL1/SLC6A2/THY1/UCHL1/ITGA8/UNC5C/SLC25A27/AKAP12/TUBB4A/OLFM1/CPLX1/PDE10A/STMN2/SHANK2/COBL/CNTNAP2/GAL/TMEM100/CPNE5/TMPRSS3/RIC3/DAB2IP	56
MF	GO:0001228	DNA-binding transcription activator activity, RNA polymerase II-specific	55/1117	439/17697	8.66845e-07	4.03565e-05	3.27982e-05	DLX5/EBF1/EGR4/EPAS1/ESRRG/ETV1/FOXF2/FOXC1/GLI2/FOXA1/HNF4G/TLX1/HOXA4/HOXA5/HOXA7/HOXA10/HOXB2/HOXB3/HOXB4/HOXB5/HOXB7/HOXD8/IRF6/MYF6/NFIA/NFIB/PAX9/PBX1/PBX3/PGR/PLAG1/RORA/RORB/SIX1/SOX1/SOX9/SPIB/TBX2/TBX3/HMGA2/TBX18/ARNT2/SIX2/SOX21/MYT1L/VENTX/GRHL1/SIX4/SOX17/BCL11B/CSRNP3/SPIC/CTCFL/BHLHA15/EBF3	55
BP	GO:0031589	cell-substrate adhesion	54/1133	354/18670	3.37742e-10	8.45801e-08	6.36545e-08	APOD/COL1A1/COL3A1/COL8A1/COL16A1/CCN2/EDA/CTTN/DMTN/EPHA3/EPHB1/FBLN1/HOXA7/KDR/LGALS1/MUC4/DDR2/VIT/PTK2/PTN/PTPRK/S100A10/CX3CL1/SFRP1/SPOCK1/THY1/VCAM1/FZD4/PPFIA2/ITGA8/ITGBL1/MSLN/CORO2B/OLFM4/PDPN/POSTN/LYVE1/LIMCH1/EGFL6/RHOD/COL5A3/PARVA/AJAP1/ADAMTS9/SMOC2/NDNF/MMRN2/ANTXR1/PHLDB2/EMILIN3/EGFLAM/FREM1/NEXMIF/VWA2	54
BP	GO:0055074	calcium ion homeostasis	54/1133	471/18670	5.07478e-06	0.000174433	0.000131277	AGTR1/APLNR/ANK2/APOE/FASLG/C3AR1/CACNA2D1/CALB2/CAV1/CDH5/CNR1/EDN3/EDNRA/EPHX2/GJA1/GPR4/XCR1/HTR1B/HTR2A/IL2/CXCR1/KCNA5/KEL/LCK/CXCL9/PDGFRA/RYR2/CCL1/CCL8/CCL14/CCL23/XCL1/CX3CL1/CXCL12/SGCD/STC1/THY1/TRPC1/TRPC3/TRPC6/WNT5A/XK/STC2/TRPA1/TSPOAP1/KL/SLC25A27/TRDN/NMU/MCOLN3/JPH1/RIC3/C1QTNF1/MCOLN2	54
BP	GO:0072503	cellular divalent inorganic cation homeostasis	54/1133	493/18670	1.88784e-05	0.000472769	0.000355803	AGTR1/APLNR/ANK2/APOE/FASLG/C3AR1/CACNA2D1/CALB2/CAV1/CDH5/CNR1/EDN3/EDNRA/EPHX2/GJA1/GPR4/XCR1/HTR1B/HTR2A/IL2/CXCR1/KCNA5/KEL/LCK/CXCL9/PDGFRA/RYR2/CCL1/CCL8/CCL14/CCL23/XCL1/CX3CL1/CXCL12/STC1/THY1/TRPC1/TRPC3/TRPC6/WNT5A/XK/SLC30A4/STC2/TRPA1/TSPOAP1/SLC25A27/TRDN/NMU/MCOLN3/JPH1/RIC3/C1QTNF1/SLC30A8/MCOLN2	54
MF	GO:0005216	ion channel activity	53/1117	416/17697	8.16105e-07	4.02292e-05	3.26947e-05	ASIC2/CACNA1E/CACNA2D1/CLCA1/CLCN4/CNR1/GABRA2/GABRB2/GABRB3/GABRD/GABRE/GABRG2/GRIA3/GRID1/GRIK4/HTR1B/HTR3A/KCNA2/KCNA3/KCNA5/KCNH2/KCNJ3/KCNJ11/KCNJ15/KCNK1/KCNN3/KCNQ3/RYR2/SCN3A/SCNN1B/SNAP25/ABCC8/TRPC1/TRPC3/TRPC6/CACNA1I/TRPA1/TSPOAP1/ABCC9/SLC17A3/CACNG4/CLIC5/ANO1/MCOLN3/ASIC4/JPH1/TMEM63C/KCNK15/LRRC38/BEST3/MCOLN2/KCNT2/KCNE1B	53
MF	GO:0022838	substrate-specific channel activity	53/1117	428/17697	1.95062e-06	7.43008e-05	6.03851e-05	ASIC2/CACNA1E/CACNA2D1/CLCA1/CLCN4/CNR1/GABRA2/GABRB2/GABRB3/GABRD/GABRE/GABRG2/GRIA3/GRID1/GRIK4/HTR1B/HTR3A/KCNA2/KCNA3/KCNA5/KCNH2/KCNJ3/KCNJ11/KCNJ15/KCNK1/KCNN3/KCNQ3/RYR2/SCN3A/SCNN1B/SNAP25/ABCC8/TRPC1/TRPC3/TRPC6/CACNA1I/TRPA1/TSPOAP1/ABCC9/SLC17A3/CACNG4/CLIC5/ANO1/MCOLN3/ASIC4/JPH1/TMEM63C/KCNK15/LRRC38/BEST3/MCOLN2/KCNT2/KCNE1B	53
BP	GO:0001655	urogenital system development	52/1133	330/18670	2.19035e-10	6.39947e-08	4.81621e-08	AGTR1/ASS1/BMP4/COL4A1/DCN/ENPEP/EPHA4/EPHA7/FOXC1/GDNF/GLI2/GPR4/FOXA1/HOXA11/HOXB7/TNC/ID3/ID4/MME/MMP9/NFIA/PBX1/PDGFB/PDGFRA/PLAG1/ROBO2/SDC1/SFRP1/SIX1/SOX9/WNT5A/WNT7B/ITGA8/TBX18/SLIT2/ADIPOQ/YAP1/SIX2/SULF1/WWTR1/PYGO1/GCNT4/SIX4/LGR4/CYP26B1/SOX17/FAT4/FRAS1/OSR2/IRX2/BMPER/HES5	52
BP	GO:0010721	negative regulation of cell development	52/1133	344/18670	9.98177e-10	2.18726e-07	1.64612e-07	APOE/ASCL1/COL3A1/DCC/DPYSL3/DMTN/EPHA4/EPHA7/ERBB4/FBLN1/FGF13/FRZB/ID3/ID4/LGALS1/LTF/MAP2/NFATC4/NGFR/NTRK3/PAEP/PBX1/PTK2/PTN/PTPRG/PTPRS/CX3CL1/SOX9/SPOCK1/NR2F1/THRB/THY1/TRPC6/WNT5A/SLIT2/OLIG2/SEMA3C/POSTN/DLL3/NRG3/STMN2/NLGN1/ZNF365/DKK1/HEY1/DAAM2/TMEM98/GAL/SEMA5B/SEMA6D/NEXMIF/HES5	52
BP	GO:0045785	positive regulation of cell adhesion	52/1133	403/18670	2.14829e-07	1.56915e-05	1.18093e-05	CAV1/CD6/CD28/CD40LG/COL8A1/COL16A1/CTLA4/DMTN/GLI2/FOXA1/IBSP/IFNG/IGF2/IL2/IL7/IL7R/IL10/KDR/LCK/LGALS1/MYO10/VIT/PRSS2/PTN/S100A10/XCL1/CX3CL1/CXCL12/SFRP1/SFRP2/SPTA1/THY1/VCAM1/WNT5A/PLPP3/CHRD/ADAM19/EBI3/OLFM4/PDPN/EGFL6/ICOS/RHOD/EPB41L4B/SIRPG/SMOC2/DUSP26/NDNF/MMRN2/EMILIN3/EGFLAM/IL23R	52
BP	GO:0006874	cellular calcium ion homeostasis	52/1133	458/18670	9.96651e-06	0.000297806	0.000224127	AGTR1/APLNR/ANK2/APOE/FASLG/C3AR1/CACNA2D1/CALB2/CAV1/CDH5/CNR1/EDN3/EDNRA/EPHX2/GJA1/GPR4/XCR1/HTR1B/HTR2A/IL2/CXCR1/KCNA5/KEL/LCK/CXCL9/PDGFRA/RYR2/CCL1/CCL8/CCL14/CCL23/XCL1/CX3CL1/CXCL12/STC1/THY1/TRPC1/TRPC3/TRPC6/WNT5A/XK/STC2/TRPA1/TSPOAP1/SLC25A27/TRDN/NMU/MCOLN3/JPH1/RIC3/C1QTNF1/MCOLN2	52
CC	GO:0045177	apical part of cell	52/1188	384/19717	3.62985e-08	1.04838e-06	8.04635e-07	ANK2/ATP1B2/CEACAM1/EDA/EGFR/ENPEP/FAP/FAT1/GJA1/KCNA5/KCNK1/MAL/MYO6/DDR2/PRKG2/LGMN/PTK2/SCNN1B/SLC1A1/SLC10A2/SLC12A3/STC1/TF/THY1/TJP1/VCAM1/ITGA8/MPDZ/OSMR/KL/SLC25A27/PATJ/PDPN/CHL1/SLC17A3/GJB6/SHANK2/AMOTL2/RHCG/CLIC5/EPB41L4B/ANO1/AJAP1/CYP4F12/FAT4/PARD3B/CD300LG/SLC5A12/ADGRF5/GPIHBP1/SLC6A19/OCLN	52
BP	GO:0061448	connective tissue development	51/1133	273/18670	4.82767e-13	2.82097e-10	2.12304e-10	NKX3-2/BMP3/BMP4/BMP5/CHI3L1/COL1A1/COL2A1/COL5A1/COL6A3/COL11A1/COL12A1/CCN2/EFEMP1/FGF9/FRZB/GDF2/GLI2/GPR4/FOXA1/HOXA3/HOXA5/HOXA11/HOXB3/ID4/LUM/MATN3/MGP/MMP13/NFIB/ROR2/PDGFB/VIT/PRRX1/SFRP2/SNAI2/SOX9/STC1/WNT5A/WNT7B/HMGA2/CCN4/SIX2/SULF1/SOX6/COL21A1/PKDCC/OSR2/SELENOM/RSPO2/VWA2/HES5	51
BP	GO:0098742	cell-cell adhesion via plasma-membrane adhesion molecules	51/1133	273/18670	4.82767e-13	2.82097e-10	2.12304e-10	ANXA3/CEACAM1/CD6/CDH1/CDH5/CDH6/CDH8/CDH9/CDH10/CDH11/CDH15/CEACAM8/DSC1/FAT1/IL10/PCDH1/PCDH8/PTPRD/PTPRS/ROBO1/ROBO2/CX3CL1/VCAM1/SPARCL1/ADIPOQ/NLGN1/FLRT3/TENM4/PCDHB5/PCDH17/PCDH18/DCHS2/PCDHGA3/PCDHB7/PCDHB6/PCDHB4/PCDHA11/PCDHA5/PCDHA3/CD177/TENM2/LRRC4C/CADM3/CDH22/FAT4/NECTIN4/HMCN1/IGSF21/CDHR1/FAT3/SDK1	51
BP	GO:0001667	ameboidal-type cell migration	51/1133	461/18670	2.45124e-05	0.000594058	0.000447085	ANXA3/APOE/CEACAM1/BMP4/DCN/EDN3/EPHA2/DMTN/ERBB4/FAP/GDF2/GDNF/IFNG/KDR/MET/MMP9/DDR2/PDGFB/PITX2/PRKD1/LGMN/PTK2/PTN/PTPRG/ROBO1/SOX9/STC1/NR2F2/TWIST1/VEGFC/WNT5A/SLIT2/BCAR1/AKAP12/SEMA3C/SASH1/AMOTL2/SEMA5B/EPB41L4B/ADAMTS9/RHOJ/SMOC2/SOX17/MMRN2/SEMA6D/EPPK1/ACVR1C/CCBE1/DAB2IP/CLEC14A/BMPER	51
BP	GO:0048871	multicellular organismal homeostasis	51/1133	485/18670	9.18784e-05	0.00158748	0.00119473	ACHE/ADCY2/ADRB1/ALDH1A1/AZGP1/CAV1/CNR1/COL2A1/CCN2/EGFR/EPAS1/ESRRG/FOXC1/GJA1/HTR2A/IL7/KRT1/LAMA4/LCN2/LTF/MC4R/MET/MUC4/NOVA1/PRKAA2/RHAG/SCNN1B/SOX9/TF/TFF3/TUB/CLRN1/LDB2/ADIPOQ/YAP1/NMU/WWTR1/GRHL1/YBX2/LGR4/CYP26B1/TP53INP2/PRDM16/CYP4F12/FA2H/CDHR1/PM20D1/ADGRF5/TMEM119/VSIG1/SFTPA1	51
BP	GO:0030900	forebrain development	50/1133	381/18670	2.17884e-07	1.56966e-05	1.18132e-05	ANXA3/ASCL1/BMP4/CDH1/COL3A1/CRH/DLX5/EGFR/ERBB4/FGF13/GLI2/GNAO1/ID4/MYO1D/NEFL/NFIB/NPY/NTRK2/PITX2/PRKG1/RELN/PTN/PTPRS/ROBO1/ROBO2/CXCL12/SOX1/TBX3/NR2F2/WNT5A/WNT7B/CHRD/DCLK1/SLIT2/OLIG2/TACC2/NRG3/DKK1/SYNE2/VAX2/TSKU/CNTNAP2/SLITRK5/SALL3/GNG12/BCL11B/TMEM108/FAT4/DAB2IP/HES5	50
BP	GO:0022407	regulation of cell-cell adhesion	50/1133	403/18670	1.19343e-06	5.74572e-05	4.3242e-05	ARG1/ASS1/CEACAM1/BMP4/CAV1/CD6/CD28/CD40LG/CDH1/CTLA4/DMTN/EPHA7/LRRC32/GLI2/FOXA1/IFNG/IGF2/IL2/IL7/IL7R/IL10/LCK/LGALS1/MYO10/PCDH8/PRKG1/PTK2/XCL1/CX3CL1/CXCL12/SNAI2/SPTA1/PRDX2/THY1/VCAM1/WNT5A/PLPP3/ADAM19/ADIPOQ/EBI3/PDPN/VSIG4/ICOS/SIRPG/C1QTNF1/CCM2L/IL23R/ADAMTS18/NEXMIF/TARM1	50
BP	GO:1901342	regulation of vasculature development	50/1133	422/18670	4.51944e-06	0.000163915	0.000123362	AGTR1/APLNR/ANXA3/FASLG/ADGRB3/CEACAM1/BMP4/C3AR1/CDH5/CHI3L1/COL4A2/DCN/EPHA2/FGF9/FOXC1/FLT1/GDF2/GHSR/GPR4/HOXA5/IL10/KDR/KRT1/NGFR/NPR1/PDGFB/PRKD1/PTGIS/PTN/CX3CL1/SFRP1/SFRP2/TWIST1/VEGFC/WNT5A/HMGA2/RAMP2/SULF1/SASH1/HEY1/HEY2/TSPAN12/TMEM100/ADAMTS9/RHOJ/SMOC2/MMRN2/CCBE1/DAB2IP/BMPER	50
BP	GO:0050769	positive regulation of neurogenesis	50/1133	474/18670	9.92419e-05	0.00164124	0.00123518	ADRA2C/APOE/ASCL1/BMP4/BMP5/CNR1/DPYSL3/EPHA3/EPHA4/GLI2/FOXA1/IFNG/IL2/MME/NAP1L2/NEFL/NGFR/NTRK2/NTRK3/PRKN/PLAG1/PRKD1/RELN/PTN/PTPRD/ROBO1/ROBO2/CX3CL1/CXCL12/TRPC6/VEGFC/WNT5A/FZD4/KALRN/SLIT2/OLIG2/STMN2/NLGN1/ZNF365/SHANK2/DKK1/COBL/NEDD4L/TENM4/PACSIN1/GPRC5B/CPNE5/NDNF/IL34/DAB2IP	50
BP	GO:0016049	cell growth	50/1133	484/18670	0.000165659	0.00248736	0.00187197	AGTR1/APOE/CEACAM1/DCC/EGFR/CTTN/EPHA7/ESR2/FGF13/FRZB/GDF2/GJA1/IGFBP3/IGFBP4/IGFBP5/IL2/MAP2/NPR1/NTRK3/PRKN/ENPP1/PRSS2/PTPRS/ROS1/CXCL12/SFRP1/SFRP2/SLIT3/SOX9/SPOCK1/WNT5A/DCLK1/SLIT2/BCAR1/OLFM1/SEMA3C/POSTN/NRG3/EPB41L3/COBL/NEDD4L/FLRT3/KIF26A/GAL/SEMA5B/PAK5/CPNE5/SOX17/TMEM108/SEMA6D	50
BP	GO:0050727	regulation of inflammatory response	50/1133	485/18670	0.00017414	0.00257247	0.00193603	A2M/AGTR1/ABCD2/APOD/APOE/C1S/C2/C3AR1/C4B/C7/CD5L/CD6/CD28/CDH5/CNR1/CPN2/CR1L/CR2/DNASE1L3/EGFR/GHSR/FFAR3/CFI/IL2/IL10/KLKB1/KRT1/LBP/MMP8/MMP9/NOS2/PROS1/PTGIS/RORA/CCL1/CCL14/CCL18/XCL1/CX3CL1/WNT5A/CCN4/PGLYRP1/OSMR/ADIPOQ/VSIG4/GPRC5B/FNDC4/TSLP/IL33/C2CD4A	50
MF	GO:0004175	endopeptidase activity	49/1117	427/17697	3.65856e-05	0.000958085	0.000778647	C1S/C2/CPS1/CTSE/F11/FAP/GZMK/CFI/KEL/KLKB1/LTF/MME/MMP7/MMP8/MMP9/MMP13/MMP19/PAPPA/PHEX/LGMN/PRSS1/PRSS2/HTRA1/SFRP1/TLL1/TLL2/UCHL1/ADAM19/ADAM23/ADAMTS4/ADAMTS2/ADAM29/PRSS23/TMPRSS4/ADAMTS9/MMP27/TMPRSS3/ADAMTS20/ADAM33/CAPN13/TRABD2A/ADAMTS17/ADAMTS18/ADAM32/PRSS38/OVCH1/USP17L2/TRABD2B/USP17L7	49
BP	GO:0040013	negative regulation of locomotion	49/1133	396/18670	1.64607e-06	7.27454e-05	5.47478e-05	APOD/APOE/BMP5/CDH1/COL3A1/DCN/DPYSL3/ERBB4/FBLN1/GDF2/GHSR/HOXA7/IGFBP3/IGFBP5/PRKG1/PTN/PTPRG/PTPRK/ROBO1/ROBO2/CX3CL1/CXCL12/SFRP1/SFRP2/STC1/NR2F2/THY1/WNT5A/CHRD/SLIT2/ADIPOQ/SEMA3C/NRG3/MID2/PADI2/LIMCH1/SULF1/SEMA5B/ADAMTS9/MMRN2/SEMA6D/EPPK1/NAV3/PHLDB2/IL33/PODN/ACVR1C/DAB2IP/NEXMIF	49
BP	GO:0060537	muscle tissue development	49/1133	408/18670	3.85167e-06	0.000143659	0.000108117	BMP4/BMP5/CAV1/COL3A1/COL11A1/COL19A1/DCN/DSP/EPHB1/ERBB4/EYA2/FGF9/FOXC1/GJA1/GJA5/IGFBP5/KEL/LMNA/MYBPC2/MYF6/MYH6/PDGFRA/RYR2/SGCD/SIX1/SOX9/TBX2/TBX3/NR2F2/TGFBR3/TLL2/TWIST1/WNT5A/XK/ITGA8/MSC/YAP1/SEMA3C/DKK1/ZFPM2/HEY2/TENM4/SIX4/SOX6/CYP26B1/ADAMTS9/SOX17/MYO18B/CCM2L	49
BP	GO:0023061	signal release	49/1133	462/18670	0.0001016	0.00166972	0.00125663	ADRA2C/AGTR1/CACNA1E/CHAT/CNR1/CRH/EDN3/EGFR/GAD1/GHSR/GJA1/FFAR3/HTR1B/HTR2A/IFNG/INHBB/KCNA5/KCNJ11/MC4R/NOS2/PRKN/SFRP1/SLC6A9/SNAP25/ABCC8/TBX3/SYN3/FZD4/PPFIA2/KALRN/TSPOAP1/ADIPOQ/STXBP5L/CPLX1/NMU/NLGN1/RPH3A/PCLO/GAL/ANO1/SYBU/G6PC2/WLS/CADPS2/C1QTNF1/ACVR1C/SELENOM/SYT6/SLC30A8	49
BP	GO:0031667	response to nutrient levels	49/1133	499/18670	0.000614918	0.00670924	0.00504934	ADRB1/ALPL/APOE/ARG1/ASCL1/ASS1/C2/CNR1/COL1A1/CPS1/EGFR/GHSR/TNC/INHBB/KCNJ11/LCN2/MC4R/MMP7/NPY/PCK1/PHEX/PKLR/PRKAA2/PRKD1/PTN/SFRP1/SFRP2/SLC22A3/SNAI2/STC1/TRPC3/TSHB/VCAM1/STC2/LRAT/ADIPOQ/LIPG/POSTN/FSTL1/PCSK1N/CYP26B1/SPX/CADPS2/ACVR1C/BHLHA15/RNF152/SLC6A19/LRCOL1/SIK1B	49
BP	GO:0002791	regulation of peptide secretion	49/1133	500/18670	0.000642805	0.00691312	0.00520277	ACHE/ADRA2C/APOE/CACNA1E/CD40LG/CNR1/CRH/EGFR/LRRC32/GHSR/GJA1/GJA5/FFAR3/IFNG/IL2/IL10/INHBB/KCNA5/KCNJ11/MMP8/NOS2/ORM1/PAEP/PRKN/CCL1/CX3CL1/SFRP1/SNAP25/ABCC8/TWIST1/VEGFC/WNT5A/CCN4/KALRN/STXBP5L/AKAP12/POSTN/NMU/EXPH5/ANO1/LGR4/SYBU/IL26/G6PC2/WLS/TSLP/IL33/ACVR1C/SLC30A8	49
CC	GO:0005788	endoplasmic reticulum lumen	49/1188	309/19717	4.69345e-10	2.30448e-08	1.76869e-08	APOB/APOE/ARSF/BMP4/COL1A1/COL1A2/COL2A1/COL3A1/COL4A1/COL4A2/COL5A1/COL6A3/COL8A1/COL9A2/COL11A1/COL12A1/COL15A1/COL16A1/COL19A1/F5/TNC/IGFBP3/IGFBP4/IGFBP5/LGALS1/MATN3/PDGFB/SDC2/TF/WNT5A/WNT7B/SPARCL1/STC2/EBI3/MSLN/TRDN/SPON1/PRSS23/FSTL1/COLGALT2/COL5A3/P3H2/FKBP10/ARSJ/COL18A1/COL21A1/ADAMTSL1/COL22A1/GPX8	49
CC	GO:0045211	postsynaptic membrane	49/1188	323/19717	2.17626e-09	8.90452e-08	6.83421e-08	ADRA2C/ANK1/ANK2/CDH9/CDH10/CHRM3/DCC/DLG3/EPHA4/EPHA7/ERBB4/GABRA2/GABRB2/GABRB3/GABRD/GABRE/GABRG2/GRIA3/GRID1/GRIK4/HTR2A/HTR3A/KCNA3/NTRK3/PCDH8/PTPRS/SLC6A1/SLC6A9/MPDZ/PLPPR4/NLGN4Y/NLGN1/RPH3A/SHANK2/SORCS3/FLRT3/CACNG4/PCDH17/TENM2/LRFN2/NLGN4X/LRRC4C/CPEB1/TMEM108/IGSF21/CADPS2/LRRTM3/RGS7BP/SHISA7	49
BP	GO:0034330	cell junction organization	48/1133	290/18670	1.96994e-10	6.09406e-08	4.58636e-08	ANK2/APOD/CAV1/CDH1/CDH5/CDH6/CDH8/CDH9/CDH10/CDH11/CDH15/COL16A1/DSP/EPHA2/CTTN/DMTN/EPHA3/GJA1/GJA5/GJB2/KDR/PTK2/PTPRK/S100A10/SFRP1/SNAI2/THY1/TJP1/UGT8/PATJ/RAMP2/CORO2B/LIMCH1/EPB41L3/GRHL1/RHOD/CD177/NLGN4X/CADM3/PERP/CDH22/POF1B/NECTIN4/PHLDB2/FRMPD2/SDK1/CADM2/OCLN	48
BP	GO:0072001	renal system development	48/1133	293/18670	2.82841e-10	7.82874e-08	5.89186e-08	AGTR1/ASS1/BMP4/COL4A1/DCN/ENPEP/EPHA4/EPHA7/FOXC1/GDNF/GLI2/GPR4/HOXA11/HOXB7/ID3/MME/MMP9/NFIA/PBX1/PDGFB/PDGFRA/ROBO2/SDC1/SFRP1/SIX1/SOX9/WNT5A/WNT7B/ITGA8/TBX18/SLIT2/ADIPOQ/YAP1/SIX2/SULF1/WWTR1/PYGO1/GCNT4/SIX4/LGR4/CYP26B1/SOX17/FAT4/FRAS1/OSR2/IRX2/BMPER/HES5	48
BP	GO:0051961	negative regulation of nervous system development	48/1133	315/18670	3.36907e-09	5.36907e-07	4.04074e-07	APOE/ASCL1/COL3A1/DCC/DPYSL3/EPHA4/EPHA7/ERBB4/FGF13/ID3/ID4/LGALS1/MAP2/NFATC4/NGFR/NTRK3/PBX1/PTK2/PTN/PTPRG/PTPRS/ROBO2/CX3CL1/SOX9/SPOCK1/NR2F1/THRB/THY1/TRPC6/WNT5A/CHRD/SLIT2/OLIG2/SEMA3C/DLL3/NRG3/STMN2/NLGN1/ZNF365/ARHGEF15/DKK1/HEY1/DAAM2/TMEM98/SEMA5B/SEMA6D/NEXMIF/HES5	48
MF	GO:0005201	extracellular matrix structural constituent	47/1117	163/17697	3.01141e-19	2.52356e-16	2.05093e-16	BGN/CHI3L1/COL1A1/COL1A2/COL2A1/COL3A1/COL4A1/COL4A2/COL5A1/COL6A3/COL8A1/COL9A2/COL11A1/COL12A1/COL15A1/COL16A1/COL19A1/DCN/FBLN1/EFEMP1/FMOD/TNC/IMPG1/LAMA4/LTBP2/LUM/MATN3/MGP/MUC4/PRELP/TNXB/TFPI2/SRPX/ADIPOQ/PRG3/SPON1/POSTN/MXRA5/COL5A3/MMRN2/FRAS1/COL18A1/COL21A1/HMCN1/EMILIN3/PODN/COL22A1	47
BP	GO:1903522	regulation of blood circulation	47/1133	297/18670	1.40368e-09	2.74612e-07	2.06672e-07	ASIC2/ADRA2C/ADRB1/AGTR1/ANK2/ATP1A4/ATP1B2/CACNA2D1/CAV1/CHRM3/CCN2/CYP2J2/DSP/EDN3/EGFR/EPAS1/FGF13/GJA1/GJA5/GNAO1/HTR2A/IL2/KCNA5/KCNH2/KCNJ3/KCNJ11/KCNK1/MYH6/MYL4/NPR1/RYR2/SLC1A1/STC1/TBX2/THRB/TRPC1/NOS1AP/ABCC9/TRDN/NMU/HEY2/CACNG4/CTNNA3/KCNK15/SPX/ARHGAP42/KCNE1B	47
BP	GO:0030111	regulation of Wnt signaling pathway	47/1133	363/18670	7.41485e-07	4.19298e-05	3.15561e-05	APOE/CAV1/COL1A1/DLX5/EDA/EGFR/FGF9/GPC5/FOXL1/FRZB/IGFBP4/MLLT3/NFATC4/ROR2/PRKN/SFRP1/SFRP2/SNAI2/SOX9/WNT5A/PLPP3/CCN4/TBX18/YAP1/WIF1/DKK1/SULF1/DAAM2/SOSTDC1/WWTR1/TSKU/GPRC5B/LGR4/SOX17/NXN/WNK2/TLE6/WLS/CXXC4/RSPO3/TRABD2A/TMEM198/DAB2IP/RSPO1/RSPO2/SHISA2/TRABD2B	47
BP	GO:0050678	regulation of epithelial cell proliferation	47/1133	378/18670	2.33621e-06	9.37947e-05	7.05894e-05	AGTR1/APLNR/APOE/ARG1/CEACAM1/BMP4/BMP5/CAV1/DLX5/EGFR/FGF9/FLT1/GDF2/GHSR/GJA1/HOXA5/IL10/KDR/NFIB/NGFR/PDGFB/PGR/PRKD1/HTRA1/PTN/PTPRK/ROBO1/CXCL12/SFRP1/SFRP2/SIX1/SNAI2/SOX9/NR2F2/TGFBR3/TWIST1/VEGFC/WNT5A/YAP1/SULF1/SIX4/IL26/BCL11B/EPPK1/OSR2/DAB2IP/HES5	47
BP	GO:0051271	negative regulation of cellular component movement	47/1133	384/18670	3.60977e-06	0.000136574	0.000102785	APOD/APOE/BMP5/CDH1/COL3A1/DCN/DPYSL3/ERBB4/FBLN1/GDF2/HOXA7/IGFBP3/IGFBP5/PRKG1/PTN/PTPRG/PTPRK/ROBO1/CX3CL1/CXCL12/SFRP1/SFRP2/STC1/NR2F2/TGFBR3/THY1/WNT5A/CHRD/SLIT2/ADIPOQ/SEMA3C/NRG3/PADI2/LIMCH1/SULF1/SEMA5B/ADAMTS9/MMRN2/SEMA6D/EPPK1/NAV3/PHLDB2/IL33/PODN/ACVR1C/DAB2IP/NEXMIF	47
BP	GO:0003012	muscle system process	47/1133	465/18670	0.00041985	0.00511109	0.00384658	ADRA2C/ANK2/CACNA2D1/CALD1/CAV1/CHRM3/CCN2/DSP/EDN3/EDNRA/CTTN/FGF12/GDNF/GHSR/GJA1/GJA5/GNAO1/HTR2A/IGFBP5/KCNA5/KCNH2/KCNJ3/LMNA/MB/MYBPC2/MYH6/MYL4/PRKG1/PTK2/RYR2/SGCD/SLC6A8/STAC/STC1/TRPC3/NOS1AP/TRDN/NMU/UTS2/SULF1/NEDD4L/HEY2/CTNNA3/SPX/TRIM63/ARHGAP42/KCNE1B	47
BP	GO:0050708	regulation of protein secretion	47/1133	472/18670	0.000582731	0.0064382	0.00484536	ACHE/ADRA2C/APOE/CACNA1E/CD40LG/CNR1/CRH/EGFR/LRRC32/GHSR/GJA1/GJA5/IFNG/IL2/IL10/INHBB/KCNA5/KCNJ11/MMP8/NOS2/ORM1/PAEP/PRKN/CCL1/CX3CL1/SFRP1/SNAP25/ABCC8/TWIST1/VEGFC/WNT5A/CCN4/STXBP5L/AKAP12/POSTN/NMU/EXPH5/ANO1/LGR4/SYBU/IL26/G6PC2/WLS/TSLP/IL33/ACVR1C/SLC30A8	47
CC	GO:0033267	axon part	47/1188	382/19717	2.61582e-06	4.28122e-05	3.28583e-05	ADRA2C/ANK1/ANK2/CDH8/CHRM3/CNR1/CRH/DLG3/DPYSL3/CTTN/EPHA4/FGF13/GAD1/HTR1B/KCNA2/KCNA3/KCNJ11/KCNQ3/KIF5A/MAP2/MYO1D/NEFL/NTRK2/ROR1/ROBO2/SNAP25/SPOCK1/THY1/UCHL1/AP3B2/UNC5C/TSPOAP1/TUBB4A/OLFM1/CPLX1/NMU/STMN2/SHANK2/EPB41L3/COBL/FLRT3/CNTNAP2/PACSIN1/SYBU/TENM2/TMEM108/STMN4	47
KEGG	hsa04060	Cytokine-cytokine receptor interaction	47/528	295/8076	7.41651e-09	1.06427e-06	9.6805e-07	FASLG/BMP3/BMP4/BMP5/CD40LG/EDA/EPOR/GDF2/GHR/XCR1/IFNG/IL2/IL2RB/IL5RA/IL7/IL7R/CXCR1/IL10/INHBB/LIFR/CXCL9/NGFR/CCL1/CCL8/CCL14/CCL16/CCL18/CCL23/XCL1/CX3CL1/CXCL12/XCL2/IL18RAP/OSMR/CXCL14/EBI3/TNFRSF13B/IL36A/IL22/IL26/TSLP/IL33/ACVR1C/IL17RE/IL34/IL23R/IFNLR1	47
MF	GO:0005539	glycosaminoglycan binding	46/1117	229/17697	1.79246e-12	7.51041e-10	6.1038e-10	APOB/APOE/BGN/BMP4/COL5A1/COL11A1/CCN2/DCN/DPYSL3/F11/FGF9/LTBP2/LTF/MMP7/NELL2/VIT/PRELP/PTN/PTPRS/CCL8/CCL23/SFRP1/SLIT3/TGFBR3/TNXB/CHRD/CCN5/CCN4/PGLYRP1/SLIT2/LIPG/POSTN/LYVE1/FSTL1/SULF1/COL5A3/PGLYRP4/SMOC2/GREM2/NDNF/MPIG6B/RSPO3/NAV2/EGFLAM/RSPO1/RSPO2	46
BP	GO:0048705	skeletal system morphogenesis	46/1133	239/18670	2.27443e-12	1.08739e-09	8.18361e-10	ALPL/NKX3-2/BMP4/COL1A1/COL2A1/COL6A3/COL11A1/COL12A1/CCN2/DLX5/FOXC1/HOXA3/HOXA4/HOXA5/HOXA7/HOXA11/HOXB2/HOXB3/HOXB4/HOXB5/HOXB6/HOXB7/HOXB8/HOXD8/LTF/MATN3/MGP/MMP13/ROR2/PDGFRA/VIT/PRRX1/SFRP1/SFRP2/SIX1/SOX9/STC1/TWIST1/SIX2/SIX4/CYP26B1/COL21A1/OSR2/FREM1/TMEM119/VWA2	46
BP	GO:0001654	eye development	46/1133	362/18670	1.64119e-06	7.27454e-05	5.47478e-05	ACHE/FASLG/BMP4/COL4A1/COL5A1/COL8A1/EGFR/EPHA2/EPHB1/FAT1/EFEMP1/FGF9/FOXF2/FOXC1/GJA1/NTRK2/NTRK3/PDGFRA/PITX2/PTN/RORB/SOX1/SOX9/TBX2/THRB/THY1/TUB/TWIST1/WNT5A/WNT7B/FZD4/ARHGEF15/TSPAN12/FJX1/VAX2/TSKU/RHOJ/SMOC1/BCL11B/OSR2/OLFM3/ADAMTS18/SDK1/FREM2/RD3/HES5	46
BP	GO:0150063	visual system development	46/1133	366/18670	2.22381e-06	9.20867e-05	6.93039e-05	ACHE/FASLG/BMP4/COL4A1/COL5A1/COL8A1/EGFR/EPHA2/EPHB1/FAT1/EFEMP1/FGF9/FOXF2/FOXC1/GJA1/NTRK2/NTRK3/PDGFRA/PITX2/PTN/RORB/SOX1/SOX9/TBX2/THRB/THY1/TUB/TWIST1/WNT5A/WNT7B/FZD4/ARHGEF15/TSPAN12/FJX1/VAX2/TSKU/RHOJ/SMOC1/BCL11B/OSR2/OLFM3/ADAMTS18/SDK1/FREM2/RD3/HES5	46
BP	GO:0048880	sensory system development	46/1133	371/18670	3.22267e-06	0.000123708	9.31021e-05	ACHE/FASLG/BMP4/COL4A1/COL5A1/COL8A1/EGFR/EPHA2/EPHB1/FAT1/EFEMP1/FGF9/FOXF2/FOXC1/GJA1/NTRK2/NTRK3/PDGFRA/PITX2/PTN/RORB/SOX1/SOX9/TBX2/THRB/THY1/TUB/TWIST1/WNT5A/WNT7B/FZD4/ARHGEF15/TSPAN12/FJX1/VAX2/TSKU/RHOJ/SMOC1/BCL11B/OSR2/OLFM3/ADAMTS18/SDK1/FREM2/RD3/HES5	46
BP	GO:0048545	response to steroid hormone	46/1133	385/18670	8.66619e-06	0.000268091	0.000201764	ALPL/ANXA3/ARG1/ASS1/BMP4/CAV1/CDO1/COL1A1/CPS1/CRH/CCN2/DEFA3/EGFR/ESR2/ESRRG/FHL2/GHSR/GJB2/FOXA1/HNF4G/HTR1B/IL10/MAOB/NEFL/NTRK3/PAPPA/PCK1/PGR/PTN/RORA/RORB/SDC1/SFRP1/SLIT3/STC1/NR2F1/NR2F2/THRB/WNT7B/SLIT2/ADIPOQ/RAMP2/YAP1/PADI2/IL22/TRIM63	46
BP	GO:0002683	negative regulation of immune system process	46/1133	463/18670	0.000695804	0.00738341	0.00555672	A2M/APOD/ARG1/CEACAM1/BMP4/BMP5/CNR1/COL3A1/CTLA4/LRRC32/HOXA5/HOXA7/HOXA9/HOXB8/IL2/IL7R/IL10/LTF/HTRA1/PTPRS/XCL1/CX3CL1/CXCL12/SFRP1/SOX9/TAL1/PRDX2/THY1/TSPAN6/PGLYRP1/SLIT2/ADIPOQ/PADI2/VSIG4/TNFRSF13B/LILRA4/GAL/UBASH3A/LGR4/PGLYRP4/IL33/BPIFB1/DAB2IP/ADGRF5/HES5/TARM1	46
BP	GO:0043087	regulation of GTPase activity	46/1133	479/18670	0.00140618	0.0127064	0.00956276	ADRB1/ALDH1A1/ADGRB3/EPHA2/EPHA3/EPHA4/GNAO1/NTRK2/NTRK3/PRKG1/PTK2/RAP1GAP/RGS7/RGS16/S100A10/CCL1/CCL8/CCL14/CCL16/CCL18/CCL23/XCL1/CX3CL1/SFRP1/XCL2/THY1/WNT5A/RGS5/KALRN/SLIT2/ARHGAP29/STXBP5L/RGS6/ARHGEF15/DOCK9/RASIP1/ASAP3/ARHGAP28/PREX2/ARHGAP39/SYDE2/AGAP1/SGSM1/ARHGAP42/DAB2IP/USP17L2	46
BP	GO:0072511	divalent inorganic cation transport	46/1133	489/18670	0.00212143	0.0174595	0.0131399	APLNR/ANK2/FASLG/CACNA1E/CACNA2D1/CAV1/CLCA1/CRH/CCN2/FGF14/GEM/GJA1/GNAO1/HTR2A/IFNG/LCK/CXCL9/PDGFB/RYR2/CCL8/XCL1/CX3CL1/CXCL12/STAC/STC1/TCN2/THY1/TRPC1/TRPC3/TRPC6/SLC30A4/TUSC3/STC2/CACNA1I/TRPA1/NOS1AP/RAMP2/TRDN/CACNG4/MCOLN3/SLC30A10/JPH1/BHLHA15/SLC30A8/MCOLN2/NIPAL4	46
MF	GO:0022839	ion gated channel activity	45/1117	334/17697	1.20058e-06	5.03043e-05	4.08829e-05	ASIC2/CACNA1E/CACNA2D1/CLCA1/CLCN4/CNR1/GABRA2/GABRB2/GABRB3/GABRD/GABRE/GABRG2/GRIA3/GRID1/GRIK4/HTR1B/HTR3A/KCNA2/KCNA3/KCNA5/KCNH2/KCNJ3/KCNJ11/KCNJ15/KCNK1/KCNN3/KCNQ3/RYR2/SCN3A/SCNN1B/SNAP25/CACNA1I/TRPA1/TSPOAP1/SLC17A3/CACNG4/CLIC5/ANO1/MCOLN3/JPH1/TMEM63C/LRRC38/MCOLN2/KCNT2/KCNE1B	45
MF	GO:0022836	gated channel activity	45/1117	343/17697	2.49023e-06	8.69506e-05	7.06658e-05	ASIC2/CACNA1E/CACNA2D1/CLCA1/CLCN4/CNR1/GABRA2/GABRB2/GABRB3/GABRD/GABRE/GABRG2/GRIA3/GRID1/GRIK4/HTR1B/HTR3A/KCNA2/KCNA3/KCNA5/KCNH2/KCNJ3/KCNJ11/KCNJ15/KCNK1/KCNN3/KCNQ3/RYR2/SCN3A/SCNN1B/SNAP25/CACNA1I/TRPA1/TSPOAP1/SLC17A3/CACNG4/CLIC5/ANO1/MCOLN3/JPH1/TMEM63C/LRRC38/MCOLN2/KCNT2/KCNE1B	45
BP	GO:0051216	cartilage development	45/1133	209/18670	6.12696e-14	6.44434e-11	4.84998e-11	NKX3-2/BMP3/BMP4/BMP5/CHI3L1/COL1A1/COL2A1/COL6A3/COL11A1/COL12A1/CCN2/EFEMP1/FGF9/FRZB/GDF2/GLI2/HOXA3/HOXA5/HOXA11/HOXB3/LUM/MATN3/MGP/MMP13/NFIB/ROR2/VIT/PRRX1/SFRP2/SNAI2/SOX9/STC1/WNT5A/WNT7B/HMGA2/CCN4/SIX2/SULF1/SOX6/COL21A1/PKDCC/OSR2/RSPO2/VWA2/HES5	45
BP	GO:0050768	negative regulation of neurogenesis	45/1133	295/18670	1.00674e-08	1.36304e-06	1.02582e-06	APOE/ASCL1/COL3A1/DCC/DPYSL3/EPHA4/EPHA7/ERBB4/FGF13/ID3/ID4/LGALS1/MAP2/NFATC4/NGFR/NTRK3/PBX1/PTK2/PTN/PTPRG/PTPRS/CX3CL1/SOX9/SPOCK1/NR2F1/THRB/THY1/TRPC6/WNT5A/SLIT2/OLIG2/SEMA3C/DLL3/NRG3/STMN2/NLGN1/ZNF365/DKK1/HEY1/DAAM2/TMEM98/SEMA5B/SEMA6D/NEXMIF/HES5	45
BP	GO:0018108	peptidyl-tyrosine phosphorylation	45/1133	363/18670	4.13048e-06	0.000151904	0.000114322	CAV1/DLG3/DOCK3/EGFR/EPHA2/DMTN/EPHA3/EPHA4/EPHA7/EPHB1/ERBB4/EFEMP1/FLT1/GHR/HTR2A/IFNG/IGF2/IL2/IL7/ITK/KDR/LCK/MET/MST1R/NTRK2/NTRK3/ROR1/ROR2/DDR2/PDGFB/PDGFRA/RELN/PTK2/ROS1/SFRP1/SFRP2/TAL1/THY1/ADIPOQ/GPRC5B/TSLP/PKDCC/IL23R/EPHA10/HES5	45
BP	GO:0032102	negative regulation of response to external stimulus	45/1133	365/18670	4.77829e-06	0.000170088	0.000128007	ABCD2/APOD/APOE/CEACAM1/CDH5/EPHA4/F11/FAP/GHSR/GJA1/IL2/IL10/KLKB1/KRT1/LTF/PDGFB/PDGFRA/PRKG1/PROS1/HTRA1/PTGIS/PTPRS/ROBO1/ROBO2/RORA/CX3CL1/SNAI2/PRDX2/TSPAN8/TSPAN6/WNT5A/PGLYRP1/SLIT2/ADIPOQ/SEMA3C/PADI2/SEMA5B/AJAP1/FNDC4/SEMA6D/SPX/EPPK1/PHLDB2/C1QTNF1/ADAMTS18	45
BP	GO:0018212	peptidyl-tyrosine modification	45/1133	366/18670	5.13639e-06	0.000175404	0.000132008	CAV1/DLG3/DOCK3/EGFR/EPHA2/DMTN/EPHA3/EPHA4/EPHA7/EPHB1/ERBB4/EFEMP1/FLT1/GHR/HTR2A/IFNG/IGF2/IL2/IL7/ITK/KDR/LCK/MET/MST1R/NTRK2/NTRK3/ROR1/ROR2/DDR2/PDGFB/PDGFRA/RELN/PTK2/ROS1/SFRP1/SFRP2/TAL1/THY1/ADIPOQ/GPRC5B/TSLP/PKDCC/IL23R/EPHA10/HES5	45
BP	GO:0014706	striated muscle tissue development	45/1133	390/18670	2.60927e-05	0.00062061	0.000467067	BMP4/BMP5/CAV1/COL11A1/COL19A1/DCN/DSP/EPHB1/ERBB4/EYA2/FGF9/FOXC1/GJA1/GJA5/KEL/LMNA/MYBPC2/MYF6/MYH6/PDGFRA/RYR2/SGCD/SIX1/TBX2/TBX3/NR2F2/TGFBR3/TLL2/TWIST1/WNT5A/XK/MSC/YAP1/SEMA3C/DKK1/ZFPM2/HEY2/TENM4/SIX4/SOX6/CYP26B1/ADAMTS9/SOX17/MYO18B/CCM2L	45
BP	GO:0015711	organic anion transport	45/1133	482/18670	0.00272199	0.0209396	0.015759	APOC1/APOE/ARG1/CEACAM1/CA1/CA3/GJA1/HBA1/HBA2/HBB/NOS2/NTRK2/PRKAA2/RHAG/SLC1A1/SLC1A7/SLC4A1/SLC6A1/SLC6A8/SLC6A9/SLC10A2/SLC16A2/SLCO2A1/SNAP25/XK/PPFIA2/SLC4A4/TSPOAP1/SLC17A2/PDPN/SLC17A3/CPLX1/SLC22A7/SLCO2B1/PLA2R1/SLCO1C1/SLC7A10/SPX/SLC7A3/SLC51B/SLC2A14/ERFE/SLC16A14/SLC5A12/SLC6A19	45
BP	GO:0070838	divalent metal ion transport	45/1133	483/18670	0.00283091	0.0215452	0.0162148	APLNR/ANK2/FASLG/CACNA1E/CACNA2D1/CAV1/CLCA1/CRH/CCN2/FGF14/GEM/GJA1/GNAO1/HTR2A/IFNG/LCK/CXCL9/PDGFB/RYR2/CCL8/XCL1/CX3CL1/CXCL12/STAC/STC1/THY1/TRPC1/TRPC3/TRPC6/SLC30A4/TUSC3/STC2/CACNA1I/TRPA1/NOS1AP/RAMP2/TRDN/CACNG4/MCOLN3/SLC30A10/JPH1/BHLHA15/SLC30A8/MCOLN2/NIPAL4	45
CC	GO:1902495	transmembrane transporter complex	45/1188	324/19717	1.43169e-07	3.5148e-06	2.69761e-06	ATP1A4/ATP1B2/CACNA1E/CACNA2D1/DLG3/CTTN/GABRA2/GABRB2/GABRB3/GABRD/GABRE/GABRG2/GRIA3/GRIK4/HTR3A/KCNA2/KCNA3/KCNA5/KCNH2/KCNJ3/KCNJ11/KCNK1/KCNQ3/RYR2/SCN3A/SCNN1B/SNAP25/ABCC8/TRPC1/TRPC3/TRPC6/CACNA1I/NOS1AP/ABCC9/NLGN1/SHANK2/CNTNAP2/CACNG4/CLIC5/ANO1/OLFM3/LRRC38/BEST3/SHISA7/KCNE1B	45
CC	GO:1990351	transporter complex	45/1188	332/19717	2.91146e-07	6.49784e-06	4.98709e-06	ATP1A4/ATP1B2/CACNA1E/CACNA2D1/DLG3/CTTN/GABRA2/GABRB2/GABRB3/GABRD/GABRE/GABRG2/GRIA3/GRIK4/HTR3A/KCNA2/KCNA3/KCNA5/KCNH2/KCNJ3/KCNJ11/KCNK1/KCNQ3/RYR2/SCN3A/SCNN1B/SNAP25/ABCC8/TRPC1/TRPC3/TRPC6/CACNA1I/NOS1AP/ABCC9/NLGN1/SHANK2/CNTNAP2/CACNG4/CLIC5/ANO1/OLFM3/LRRC38/BEST3/SHISA7/KCNE1B	45
MF	GO:1901681	sulfur compound binding	44/1117	250/17697	5.04454e-10	5.28416e-08	4.2945e-08	APOB/APOE/BMP4/COL5A1/COL11A1/CCN2/DPYSL3/F11/FGF9/LTBP2/LTF/MMP7/NELL2/ENPP1/PRELP/PTN/PTPRS/RYR2/CCL8/CCL23/SFRP1/SLIT3/TGFBR3/TNXB/CHRD/CCN5/CCN4/SLIT2/LIPG/FST/POSTN/FSTL1/COL5A3/OGDHL/PRMT8/HPSE2/SMOC2/GREM2/NDNF/MPIG6B/RSPO3/NAV2/RSPO1/RSPO2	44
BP	GO:0090596	sensory organ morphogenesis	44/1133	256/18670	3.2739e-10	8.45801e-08	6.36545e-08	FASLG/NKX3-2/BMP4/COL2A1/COL5A1/COL8A1/COL11A1/DLX5/EPHA2/EPHB1/FAT1/EFEMP1/FGF9/FOXF2/FRZB/GLI2/NTRK2/ROR2/PITX2/PRRX1/PTN/RORB/SIX1/SOX1/SOX9/TBX2/THRB/THY1/TWIST1/CLRN1/WNT5A/ITGA8/SIX2/GJB6/TSPAN12/FJX1/VAX2/TSKU/SIX4/CYP26B1/OSR2/OLFM3/LRIG3/SDK1	44
BP	GO:0045165	cell fate commitment	44/1133	270/18670	1.85126e-09	3.35716e-07	2.52658e-07	ASCL1/BMP4/EPAS1/ERBB4/EYA2/FGF13/GLI2/FOXA1/HOXA11/IL7/MYF6/NTRK3/ROR2/PRRX1/RORA/SFRP1/SFRP2/SIX1/SOX1/SOX9/TAL1/TBX2/TBX3/NR2F2/WNT5A/WNT7B/TBX18/OLIG2/PDPN/SIX2/POU6F2/DKK1/MYT1L/HEY2/SOSTDC1/TENM4/ESRP1/SOX6/CYP26B1/SOX17/BCL11B/WNT10A/IL23R/HES5	44
BP	GO:0060485	mesenchyme development	44/1133	278/18670	4.67198e-09	6.82498e-07	5.13644e-07	BMP4/BMP5/COL1A1/EDN3/EDNRA/EPHA3/ERBB4/FGF9/FOXF2/FOXC1/FRZB/GDNF/FOXA1/HOXA5/PITX2/ROBO1/ROBO2/SFRP1/SFRP2/SIX1/SNAI2/SOX9/TBX2/TGFBR3/TWIST1/WNT5A/HMGA2/YAP1/OLFM1/SEMA3C/PDPN/DLL3/SIX2/ZFPM2/HEY1/HEY2/WWTR1/SIX4/SEMA5B/TMEM100/SEMA6D/WNT10A/PHLDB2/DAB2IP	44
BP	GO:0048562	embryonic organ morphogenesis	44/1133	288/18670	1.39912e-08	1.64432e-06	1.2375e-06	NKX3-2/BMP4/COL2A1/COL11A1/DLX5/EPHA2/EFEMP1/FGF9/FOXF2/FRZB/GJA1/GLI2/HOXA3/HOXA4/HOXA5/HOXA7/HOXA11/HOXB2/HOXB3/HOXB4/HOXB5/HOXB6/HOXB7/HOXB8/ROR2/PDGFRA/PRRX1/RYR2/SIX1/SOX9/TBX2/TBX3/TWIST1/CLRN1/WNT5A/ITGA8/YAP1/SIX2/GJB6/VAX2/SIX4/SOX17/OSR2/LRIG3	44
BP	GO:0003015	heart process	44/1133	290/18670	1.72906e-08	1.78296e-06	1.34185e-06	ADRB1/ANK2/ATP1A4/ATP1B2/CACNA2D1/CAV1/CCN2/CYP2J2/DSP/EDN3/EPAS1/FGF12/GJA1/GJA5/GNAO1/IL2/KCNA5/KCNH2/KCNJ3/KCNJ11/KCNK1/MYH6/MYL4/NPR1/RYR2/SGCD/SLC1A1/STC1/TBX2/THRB/TRPC1/NOS1AP/ABCC9/TRDN/YAP1/NMU/NEDD4L/HEY2/WWTR1/CACNG4/CTNNA3/KCNK15/SPX/KCNE1B	44
BP	GO:0001101	response to acid chemical	44/1133	343/18670	2.13557e-06	9.04785e-05	6.80936e-05	APOB/ARG1/ASCL1/ASS1/CDO1/COL1A1/COL1A2/COL3A1/COL4A1/COL16A1/CPS1/CCN2/EGFR/EPHA3/GJA1/GJB2/FFAR3/TNC/ID3/KDR/NFATC4/NTRK2/NTRK3/PCK1/PDGFB/PDGFRA/PRKAA2/PTN/RORB/SFRP1/SIX1/SOX9/TGFBR3/WNT5A/WNT7B/FZD4/LRAT/ADIPOQ/YAP1/DKK1/PID1/CYP26B1/CPEB1/COL18A1	44
BP	GO:0048638	regulation of developmental growth	44/1133	347/18670	2.90934e-06	0.000113335	8.52954e-05	ADRB1/APOE/BMP4/DCC/CTTN/EPHA7/ERBB4/FGF9/FGF13/FOXC1/GHR/GHSR/GJA1/IGF2/IL7/MAP2/MYH6/NTRK3/PRKN/LGMN/PTK2/PTPRS/CXCL12/SFRP1/SFRP2/SIX1/TBX2/TGFBR3/TLL2/PHLDA2/WNT5A/STC2/YAP1/OLFM1/SEMA3C/NEDD4L/ZFPM2/HEY2/GAL/SIX4/SEMA5B/CPNE5/SEMA6D/EPPK1	44
BP	GO:0045765	regulation of angiogenesis	44/1133	383/18670	3.55134e-05	0.000766935	0.000577191	AGTR1/APLNR/ANXA3/FASLG/ADGRB3/CEACAM1/C3AR1/CDH5/CHI3L1/COL4A2/DCN/EPHA2/FOXC1/FLT1/GDF2/GHSR/GPR4/HOXA5/IL10/KDR/KRT1/NGFR/NPR1/PRKD1/PTGIS/PTN/CX3CL1/SFRP1/SFRP2/TWIST1/VEGFC/WNT5A/HMGA2/RAMP2/SULF1/SASH1/TSPAN12/ADAMTS9/RHOJ/SMOC2/MMRN2/CCBE1/DAB2IP/BMPER	44
BP	GO:0001558	regulation of cell growth	44/1133	416/18670	0.000239241	0.00329363	0.00247877	AGTR1/APOE/CEACAM1/DCC/EGFR/CTTN/EPHA7/ESR2/FGF13/FRZB/GDF2/GJA1/IGFBP3/IGFBP4/IGFBP5/IL2/MAP2/NPR1/NTRK3/PRKN/ENPP1/PRSS2/PTPRS/ROS1/CXCL12/SFRP1/SFRP2/SLIT3/SPOCK1/WNT5A/SLIT2/BCAR1/OLFM1/SEMA3C/NRG3/EPB41L3/NEDD4L/KIF26A/GAL/SEMA5B/PAK5/CPNE5/SOX17/SEMA6D	44
CC	GO:0009897	external side of plasma membrane	44/1188	393/19717	5.61885e-05	0.000641595	0.000492423	FASLG/ASTN1/AZGP1/CD3G/CD6/CD8A/CD28/CD40LG/CDH5/CTLA4/ENPEP/GFRA1/GFRA3/GHR/XCR1/IL2RB/IL5RA/IL7R/CXCR1/KCNJ3/LIFR/CXCL9/PDGFRA/SCNN1B/SDC1/CXCL12/TF/TGFBR3/THY1/VCAM1/OSMR/CD163/EBI3/NLGN1/ICOS/BTNL2/ULBP2/ANTXR1/IGSF21/IL23R/CLEC14A/GPIHBP1/FCRL6/IGLL5	44
CC	GO:0031252	cell leading edge	44/1188	403/19717	0.000100929	0.00110124	0.000845203	ANK1/CDH1/DPYSL3/EPHA2/CTTN/FAP/FAT1/GABRA2/GABRE/GABRG2/KCNA2/KCNJ11/MYO1D/MYO6/MYO10/PTK2/PTPRK/ROBO2/THY1/CLRN1/CDC42BPA/ITGA8/UNC5C/LDB2/BCAR1/PDPN/NCKAP1/WASF3/STMN2/EPB41L3/SYNE2/COBL/CNTNAP2/CTNNA3/PACSIN1/ASAP3/ENAH/PARVA/CD177/WLS/ANTXR1/PHLDB2/PLEKHH2/SHISA7	44
KEGG	hsa04151	PI3K-Akt signaling pathway	44/528	354/8076	2.35761e-05	0.000966619	0.000879228	FASLG/COL1A1/COL1A2/COL2A1/COL4A1/COL4A2/COL6A3/COL9A2/EGFR/EPHA2/EPOR/ERBB4/FGF9/FLT1/GHR/GNG11/TNC/IBSP/IGF2/IL2/IL2RB/IL7/IL7R/KDR/LAMA4/MET/NGFR/NTRK2/PCK1/PDGFB/PDGFRA/PPP2R2B/PRKAA2/RELN/PTK2/TNXB/VEGFC/TCL1A/ITGA8/OSMR/MAGI1/TCL1B/GNG12/G6PC2	44
MF	GO:0003779	actin binding	43/1117	431/17697	0.00199082	0.0228535	0.0185733	ADD2/CEACAM1/CALD1/CNN3/EGFR/CTTN/DMTN/MYBPC2/MYH6/MYL4/MYO1D/MYO6/MYO10/PRKN/PLS3/PTK2/SLC6A2/SPTA1/SPTB/TRPC6/CORO2B/WASF3/TMSB15A/COBLL1/LIMCH1/EPB41L3/SYNE2/COBL/DAAM2/CTNNA3/HOOK1/SNTG2/ENAH/PARVA/KLHL4/FMN2/POF1B/ESPN/ANTXR1/MYO18B/FHDC1/PLEKHH2/PACRG	43
BP	GO:0001822	kidney development	43/1133	278/18670	1.407e-08	1.64432e-06	1.2375e-06	AGTR1/ASS1/BMP4/DCN/ENPEP/EPHA4/EPHA7/FOXC1/GDNF/GLI2/GPR4/HOXA11/HOXB7/ID3/MME/MMP9/PBX1/PDGFB/PDGFRA/ROBO2/SDC1/SFRP1/SIX1/SOX9/WNT7B/ITGA8/SLIT2/ADIPOQ/YAP1/SIX2/SULF1/WWTR1/PYGO1/GCNT4/SIX4/LGR4/CYP26B1/FAT4/FRAS1/OSR2/IRX2/BMPER/HES5	43
BP	GO:0060562	epithelial tube morphogenesis	43/1133	322/18670	9.52314e-07	4.95863e-05	3.73184e-05	BMP4/BMP5/COL4A1/EDNRA/EPHA2/EPHA4/EPHA7/GDF2/GDNF/GJA1/GLI2/FOXA1/HOXA5/HOXA11/HOXB7/TNC/MET/NFATC4/PBX1/PGR/RYR2/SFRP1/SFRP2/SIX1/SOX9/TBX2/TBX3/TWIST1/WNT5A/SLIT2/YAP1/SIX2/COBL/SOSTDC1/SIX4/RASIP1/LGR4/SALL4/SOX17/FAT4/IRX2/RSPO2/HES5	43
BP	GO:0060070	canonical Wnt signaling pathway	43/1133	335/18670	2.73545e-06	0.000107356	8.07957e-05	APOE/CAV1/COL1A1/DLX5/EDA/EGFR/FGF9/GPC5/FRZB/IGFBP4/MLLT3/MYH6/ROR2/PRKN/RYR2/SDC1/SFRP1/SFRP2/SNAI2/SOX9/WNT5A/WNT7B/FZD4/PLPP3/TBX18/YAP1/DKK1/DAAM2/SOSTDC1/WWTR1/PYGO1/GPRC5B/LGR4/SOX17/WNK2/TLE6/WLS/WNT10A/RSPO3/TMEM198/DAB2IP/RSPO1/RSPO2	43
BP	GO:2000146	negative regulation of cell motility	43/1133	349/18670	7.84791e-06	0.000248627	0.000187116	APOD/APOE/BMP5/CDH1/COL3A1/DCN/DPYSL3/ERBB4/FBLN1/GDF2/HOXA7/IGFBP3/IGFBP5/PRKG1/PTN/PTPRG/PTPRK/ROBO1/CX3CL1/CXCL12/SFRP1/SFRP2/STC1/NR2F2/THY1/CHRD/SLIT2/ADIPOQ/NRG3/PADI2/LIMCH1/SULF1/ADAMTS9/MMRN2/SEMA6D/EPPK1/NAV3/PHLDB2/IL33/PODN/ACVR1C/DAB2IP/NEXMIF	43
BP	GO:0010959	regulation of metal ion transport	43/1133	394/18670	0.000140935	0.00217446	0.00163648	APLNR/ANK2/ATP1B2/CACNA2D1/CAV1/CRH/EDN3/FGF12/FGF14/GEM/GJA1/GNAO1/HTR2A/IFNG/KCNA5/KCNH2/KEL/CXCL9/PDGFB/RYR2/XCL1/CX3CL1/CXCL12/STAC/STC1/TF/THY1/TRPC1/TRPC3/TRPC6/STC2/NOS1AP/TRDN/NEDD4L/GAL/SLC30A10/JPH1/WNK2/NKAIN1/LRRC38/NKAIN2/NKAIN3/KCNE1B	43
BP	GO:0007517	muscle organ development	43/1133	410/18670	0.000335782	0.00432813	0.00325732	ACHE/ASS1/BMP4/CAV1/COL3A1/COL6A3/COL11A1/COL19A1/DCN/DSP/EPHB1/ERBB4/ETV1/FGF9/FOXC1/GJA1/ID3/KEL/MYBPC2/MYF6/MYH6/RYR2/SGCD/SIX1/TBX2/NR2F2/TGFBR3/TLL2/TWIST1/WNT5A/XK/LARGE1/MSC/YAP1/DKK1/ZFPM2/HEY2/SIX4/SOX6/CYP26B1/JPH1/SOX17/CCM2L	43
BP	GO:0019932	second-messenger-mediated signaling	43/1133	439/18670	0.00135326	0.0123128	0.00926657	ADCY2/ADRA2C/ADRB1/AGTR1/APLNR/ANK2/APOE/ADGRB3/CRH/EDN3/EGFR/DMTN/FHL2/XCR1/GUCY1A2/CXCR1/KDR/MC4R/CXCL9/NFATC4/NOS2/NPR1/PRKG1/RYR2/SGCD/SOX9/VCAM1/NOS1AP/RAMP2/TRDN/PDE10A/RUNDC3A/PCLO/GAL/RASD1/TMEM100/LGR4/JPH1/ADGRG6/ADGRL4/NDNF/ADGRG7/BHLHA15	43
CC	GO:0034702	ion channel complex	43/1188	301/19717	1.21369e-07	3.13644e-06	2.40722e-06	CACNA1E/CACNA2D1/DLG3/CTTN/GABRA2/GABRB2/GABRB3/GABRD/GABRE/GABRG2/GRIA3/GRIK4/HTR3A/KCNA2/KCNA3/KCNA5/KCNH2/KCNJ3/KCNJ11/KCNK1/KCNQ3/RYR2/SCN3A/SCNN1B/SNAP25/ABCC8/TRPC1/TRPC3/TRPC6/CACNA1I/NOS1AP/ABCC9/NLGN1/SHANK2/CNTNAP2/CACNG4/CLIC5/ANO1/OLFM3/LRRC38/BEST3/SHISA7/KCNE1B	43
BP	GO:0009952	anterior/posterior pattern specification	42/1133	219/18670	2.32317e-11	8.7268e-09	6.56775e-09	BMP4/FOXC1/GLI2/HOXA3/HOXA4/HOXA5/HOXA7/HOXA9/HOXA10/HOXA11/HOXB2/HOXB3/HOXB4/HOXB5/HOXB6/HOXB7/HOXB8/HOXC6/HOXD8/MLLT3/MYF6/ROR2/PBX1/PBX3/PCDH8/SFRP1/SFRP2/TBX3/NR2F2/WNT5A/TBX18/SEMA3C/DLL3/SIX2/DKK1/COBL/HEY1/HEY2/SOX17/WLS/TDRD5/HES5	42
BP	GO:0060047	heart contraction	42/1133	280/18670	5.0745e-08	4.30433e-06	3.23941e-06	ADRB1/ANK2/ATP1A4/ATP1B2/CACNA2D1/CAV1/CCN2/CYP2J2/DSP/EDN3/EPAS1/FGF12/GJA1/GJA5/GNAO1/IL2/KCNA5/KCNH2/KCNJ3/KCNJ11/KCNK1/MYH6/MYL4/NPR1/RYR2/SGCD/SLC1A1/STC1/TBX2/THRB/TRPC1/NOS1AP/ABCC9/TRDN/NMU/NEDD4L/HEY2/CACNG4/CTNNA3/KCNK15/SPX/KCNE1B	42
BP	GO:0032103	positive regulation of response to external stimulus	42/1133	323/18670	2.55168e-06	0.000101602	7.64652e-05	AGTR1/ARG1/C3AR1/CD6/CD28/CNR1/EDN3/EGFR/GHSR/FFAR3/IL2/KDR/KLKB1/LBP/MET/MMP8/NPY/NTRK3/PDGFB/PRKD1/LGMN/PTN/CCL1/CCL14/CCL18/XCL1/CX3CL1/CXCL12/XCL2/VEGFC/WNT5A/CCN4/OSMR/SLIT2/CXCL14/SASH1/GPRC5B/SMOC2/TSLP/IL33/C2CD4A/USP17L2	42
BP	GO:0030336	negative regulation of cell migration	42/1133	334/18670	5.99849e-06	0.000203512	0.000153162	APOD/APOE/BMP5/CDH1/COL3A1/DCN/DPYSL3/ERBB4/GDF2/HOXA7/IGFBP3/IGFBP5/PRKG1/PTN/PTPRG/PTPRK/ROBO1/CX3CL1/CXCL12/SFRP1/SFRP2/STC1/NR2F2/THY1/CHRD/SLIT2/ADIPOQ/NRG3/PADI2/LIMCH1/SULF1/ADAMTS9/MMRN2/SEMA6D/EPPK1/NAV3/PHLDB2/IL33/PODN/ACVR1C/DAB2IP/NEXMIF	42
BP	GO:0001505	regulation of neurotransmitter levels	42/1133	354/18670	2.4918e-05	0.000601117	0.000452398	ACHE/ASS1/CAV1/CHAT/CNR1/CPS1/GABRA2/GAD1/GDNF/HBB/HTR1B/HTR2A/IFNG/IL10/MAOA/MAOB/MMP8/NOS2/PAH/PRKN/PTGIS/RAB3B/RORA/SLC1A1/SLC1A7/SLC6A1/SLC6A2/SLC6A9/SLC22A3/SNAP25/SYN3/PPFIA2/TSPOAP1/STXBP5L/NOS1AP/PRG3/CPLX1/NLGN1/RPH3A/PCLO/CADPS2/RNF180	42
BP	GO:0006936	muscle contraction	42/1133	360/18670	3.70609e-05	0.000789442	0.000594129	ADRA2C/ANK2/CACNA2D1/CALD1/CAV1/CHRM3/CCN2/DSP/EDN3/EDNRA/CTTN/FGF12/GDNF/GHSR/GJA1/GJA5/GNAO1/HTR2A/KCNA5/KCNH2/KCNJ3/MB/MYBPC2/MYH6/MYL4/PRKG1/RYR2/SGCD/SLC6A8/STAC/STC1/NOS1AP/TRDN/NMU/UTS2/SULF1/NEDD4L/CTNNA3/SPX/TRIM63/ARHGAP42/KCNE1B	42
BP	GO:0045666	positive regulation of neuron differentiation	42/1133	371/18670	7.4198e-05	0.00136915	0.00103041	ADRA2C/APOE/ASCL1/BMP4/BMP5/CNR1/DPYSL3/EPHA3/EPHA4/GLI2/FOXA1/IL2/NAP1L2/NEFL/NGFR/NTRK2/NTRK3/PRKN/PRKD1/RELN/PTN/PTPRD/ROBO1/ROBO2/CX3CL1/CXCL12/TRPC6/WNT5A/FZD4/KALRN/SLIT2/STMN2/NLGN1/SHANK2/DKK1/COBL/NEDD4L/PACSIN1/GPRC5B/CPNE5/NDNF/DAB2IP	42
BP	GO:0007015	actin filament organization	42/1133	400/18670	0.000382241	0.00479762	0.00361066	ADD2/RND3/CCN2/DPYSL3/CTTN/DMTN/FAT1/GHSR/MET/MYBPC2/PRKN/PLS3/S100A10/CX3CL1/CXCL12/SFRP1/SPTA1/SPTB/CLRN1/SLIT2/BCAR1/EFS/CORO2B/NCKAP1/WASF3/TMSB15A/ARHGEF15/LIMCH1/COBL/RHOD/PACSIN1/MAGEL2/ASAP3/ENAH/FMN2/RHOJ/ARHGAP28/POF1B/ESPN/FHDC1/PHLDB2/PLEKHH2	42
BP	GO:0043434	response to peptide hormone	42/1133	436/18670	0.00209318	0.0174302	0.0131179	ADCY2/AGTR1/ARG1/ASS1/CEACAM1/CAV1/CDO1/COL1A1/CPS1/CCN2/CYP11A1/GHR/GHSR/GJA1/GJB2/FFAR3/GRB14/IGF2/IGFBP5/IL10/INHBB/MC4R/NEFL/PCK1/ENPP1/PHEX/PKLR/PTK2/SORT1/CXCL12/TGFBR3/STC2/KL/ADIPOQ/BCAR1/GAL/PID1/SLC30A10/CPEB1/LPIN3/ACVR1C/VWA2	42
MF	GO:0005261	cation channel activity	41/1117	319/17697	1.14016e-05	0.000308211	0.000250487	ASIC2/CACNA1E/CACNA2D1/CNR1/GRIA3/GRIK4/HTR1B/HTR3A/KCNA2/KCNA3/KCNA5/KCNH2/KCNJ3/KCNJ11/KCNJ15/KCNK1/KCNN3/KCNQ3/RYR2/SCN3A/SCNN1B/SNAP25/ABCC8/TRPC1/TRPC3/TRPC6/CACNA1I/TRPA1/TSPOAP1/ABCC9/CACNG4/ANO1/MCOLN3/ASIC4/JPH1/TMEM63C/KCNK15/LRRC38/MCOLN2/KCNT2/KCNE1B	41
BP	GO:0007416	synapse assembly	41/1133	177/18670	6.03442e-14	6.44434e-11	4.84998e-11	ASIC2/ACHE/ADD2/ADGRB3/CDH1/CDH9/EPHA7/EPHB1/ERBB4/GABRA2/GABRB2/GABRB3/GABRG2/GHSR/NTRK2/NTRK3/PTK2/PTPRD/PTPRS/ROBO2/SIX1/WNT5A/NLGN4Y/NLGN1/SHANK2/DKK1/FLRT3/FLRT2/SLITRK5/PCDHB5/PCDH17/PCLO/SIX4/CNTN5/PCDHB6/PCDHB4/NLGN4X/LRRN1/CBLN2/SDK1/LRRTM3	41
BP	GO:0003007	heart morphogenesis	41/1133	259/18670	1.55303e-08	1.70154e-06	1.28057e-06	BMP4/BMP5/COL2A1/COL5A1/COL11A1/DSP/FOXC1/GJA1/GJA5/MYBPC2/MYH6/PITX2/PTK2/ROBO1/ROBO2/RYR2/SFRP2/SIX1/SLIT3/SNAI2/SOX9/TBX2/TBX3/TGFBR3/TWIST1/WNT5A/SLIT2/YAP1/OLFM1/SEMA3C/DKK1/ZFPM2/HEY1/HEY2/FLRT2/TMEM100/PARVA/ADGRG6/SOX17/FAT4/CCM2L	41
BP	GO:0010769	regulation of cell morphogenesis involved in differentiation	41/1133	301/18670	1.0113e-06	5.11389e-05	3.84868e-05	APOE/ADGRB3/DCC/CTTN/DMTN/EPHA4/EPHA7/FBLN1/FGF13/KEL/MAP2/NEFL/NFATC4/NGFR/NTRK2/NTRK3/RELN/PTK2/PTPRD/PTPRS/ROBO1/ROBO2/S100A10/SDC2/CXCL12/THY1/TRPC6/WNT5A/XK/KALRN/SLIT2/OLFM1/SEMA3C/OLFM4/PDPN/POSTN/NLGN1/NEDD4L/SEMA5B/LRRC4C/SEMA6D	41
BP	GO:1904062	regulation of cation transmembrane transport	41/1133	342/18670	2.43091e-05	0.000591859	0.00044543	APLNR/ANK2/ANXA3/ATP1B2/CACNA2D1/CAV1/CRH/DLG3/EDN3/FGF12/FGF14/GEM/GRIA3/IFNG/KCNH2/KCNJ11/KEL/CXCL9/MMP9/NEFL/RELN/RYR2/XCL1/CX3CL1/STAC/THY1/TRPC1/TWIST1/NOS1AP/TRDN/NLGN1/SHANK2/NEDD4L/CACNG4/GAL/JPH1/WNK2/LRRC38/PM20D1/SHISA7/KCNE1B	41
BP	GO:0032970	regulation of actin filament-based process	41/1133	388/18670	0.000391675	0.00490433	0.00369097	ADD2/ANK2/RND3/CAV1/CCN2/DSP/CTTN/DMTN/EPHA3/FGF13/GJA5/MET/NTRK3/PRKN/PDGFRA/RYR2/S100A10/CX3CL1/CXCL12/SFRP1/SPTA1/SPTB/STC1/SLIT2/NOS1AP/CORO2B/PDPN/NCKAP1/TMSB15A/ARHGEF15/LIMCH1/CTNNA3/RHOD/MAGEL2/ASAP3/FMN2/RHOJ/ARHGAP28/PHLDB2/FRMD6/PLEKHH2	41
BP	GO:0008016	regulation of heart contraction	40/1133	251/18670	1.91741e-08	1.86734e-06	1.40535e-06	ADRB1/ANK2/ATP1A4/ATP1B2/CACNA2D1/CAV1/CCN2/CYP2J2/DSP/EDN3/EPAS1/FGF13/GJA1/GJA5/GNAO1/IL2/KCNA5/KCNH2/KCNJ3/KCNJ11/KCNK1/MYH6/MYL4/NPR1/RYR2/SLC1A1/STC1/TBX2/THRB/TRPC1/NOS1AP/ABCC9/TRDN/NMU/HEY2/CACNG4/CTNNA3/KCNK15/SPX/KCNE1B	40
BP	GO:0007596	blood coagulation	40/1133	336/18670	3.56806e-05	0.000766935	0.000577191	A2M/ADRA2C/APOE/CEACAM1/CAV1/CD40LG/COL1A1/COL1A2/COL3A1/DGKB/DMTN/F5/F11/FAP/FBLN1/GP5/HBB/HBG2/KLKB1/KRT1/LCK/PDGFB/PDGFRA/PRKG1/PROS1/SLC4A1/PRDX2/TSPAN8/TRPC3/TRPC6/TFPI2/H3C1/PDPN/DOCK9/ZFPM2/CD177/MPIG6B/C1QTNF1/DGKK/ADAMTS18	40
BP	GO:0007599	hemostasis	40/1133	341/18670	4.98292e-05	0.000996394	0.000749881	A2M/ADRA2C/APOE/CEACAM1/CAV1/CD40LG/COL1A1/COL1A2/COL3A1/DGKB/DMTN/F5/F11/FAP/FBLN1/GP5/HBB/HBG2/KLKB1/KRT1/LCK/PDGFB/PDGFRA/PRKG1/PROS1/SLC4A1/PRDX2/TSPAN8/TRPC3/TRPC6/TFPI2/H3C1/PDPN/DOCK9/ZFPM2/CD177/MPIG6B/C1QTNF1/DGKK/ADAMTS18	40
BP	GO:0050817	coagulation	40/1133	342/18670	5.32093e-05	0.00104025	0.000782888	A2M/ADRA2C/APOE/CEACAM1/CAV1/CD40LG/COL1A1/COL1A2/COL3A1/DGKB/DMTN/F5/F11/FAP/FBLN1/GP5/HBB/HBG2/KLKB1/KRT1/LCK/PDGFB/PDGFRA/PRKG1/PROS1/SLC4A1/PRDX2/TSPAN8/TRPC3/TRPC6/TFPI2/H3C1/PDPN/DOCK9/ZFPM2/CD177/MPIG6B/C1QTNF1/DGKK/ADAMTS18	40
BP	GO:0051047	positive regulation of secretion	40/1133	428/18670	0.00445865	0.030439	0.0229082	ACHE/CNR1/CRH/EDN3/EGFR/GDNF/GJA1/IFNG/IL2/IL10/INHBB/MMP8/NPR1/ORM1/PAEP/CCL1/SDC1/CXCL12/SLC6A1/TWIST1/VEGFC/WNT5A/CACNA1I/AKAP12/POSTN/NMU/NLGN1/PLA2R1/EXPH5/GAL/ANO1/SYBU/IL26/CD177/WLS/TSLP/IL33/CADPS2/C1QTNF1/SLC30A8	40
BP	GO:0002697	regulation of immune effector process	40/1133	458/18670	0.0132567	0.0712968	0.0536576	A2M/ARG1/CEACAM1/C1S/C2/C3AR1/C4B/C7/CD5L/CD28/CD40LG/CPN2/CR1L/CR2/DNASE1L3/FFAR3/CFI/IFNG/IL2/IL7R/IL10/LBP/PROS1/HTRA1/XCL1/TSPAN6/WNT5A/IL18RAP/PGLYRP1/TRIL/VSIG4/GPRC5B/PGLYRP4/CD177/ULBP2/IL33/IL23R/IFNLR1/USP17L2/C17orf99	40
BP	GO:0042110	T cell activation	40/1133	464/18670	0.0161168	0.0819714	0.0616912	ARG1/CEACAM1/BMP4/CAMK4/CAV1/CD3G/CD6/CD8A/CD28/CD40LG/CTLA4/LRRC32/GJA1/GLI2/IFNG/IGF2/IL2/IL7/IL7R/IL10/ITK/LCK/LGALS1/RORA/XCL1/SPTA1/PRDX2/THY1/VCAM1/EBI3/VSIG4/TMEM98/ICOS/SIRPG/CYP26B1/BCL11B/IL23R/NKX2-3/THEMIS/TARM1	40
CC	GO:0099240	intrinsic component of synaptic membrane	40/1188	164/19717	1.57575e-14	3.86847e-12	2.96905e-12	ADRA2C/CDH9/CDH10/CHRM3/CNR1/DCC/EPHA4/EPHA7/ERBB4/GABRB2/GABRD/GHSR/GRID1/GRIK4/HTR1B/HTR2A/HTR3A/KCNA2/KCNA3/KCNJ3/NTRK3/PCDH8/PTPRS/SLC6A1/SLC6A9/ADAM23/PLPPR4/NLGN1/SORCS3/FLRT3/CACNG4/PCDH17/CNTN5/LRFN2/LRRC4C/CADM3/SYT6/LRRTM3/RGS7BP/SHISA7	40
CC	GO:0016324	apical plasma membrane	40/1188	318/19717	8.42198e-06	0.000118148	9.06787e-05	ANK2/ATP1B2/CEACAM1/EGFR/ENPEP/FAT1/GJA1/KCNA5/KCNK1/MAL/DDR2/PRKG2/PTK2/SCNN1B/SLC1A1/SLC10A2/SLC12A3/STC1/TF/THY1/MPDZ/OSMR/KL/PATJ/PDPN/SLC17A3/GJB6/SHANK2/AMOTL2/RHCG/CLIC5/ANO1/AJAP1/CYP4F12/PARD3B/CD300LG/SLC5A12/GPIHBP1/SLC6A19/OCLN	40
MF	GO:0001664	G protein-coupled receptor binding	39/1117	280/17697	2.7013e-06	9.05477e-05	7.35892e-05	ADRA2C/ADRB1/AGTR1/CRH/EDN3/GNAO1/IL2/CXCL9/NPY/ROR2/PRKN/CCL1/CCL8/CCL14/CCL16/CCL18/CCL23/XCL1/CX3CL1/CXCL12/SFRP1/XCL2/TUB/UCHL1/WNT5A/WNT7B/CXCL14/INSL5/NMU/GAL/GPRC5B/WLS/WNT10A/RTP3/RSPO3/PACRG/UTS2B/RSPO1/RSPO2	39
BP	GO:0043583	ear development	39/1133	219/18670	1.1553e-09	2.43029e-07	1.82903e-07	NKX3-2/BMP4/BMP5/COL2A1/COL11A1/DLX5/EPHA4/FGF9/FRZB/GABRB2/GABRB3/GJB2/GLI2/NTRK3/ROR1/ROR2/PRRX1/PVALB/SIX1/SOX9/TWIST1/CLRN1/WNT5A/ITGA8/SLC25A27/CXCL14/PLPPR4/SIX2/GJB6/HEY2/SIX4/ESRP1/MCOLN3/FAT4/OSR2/LRIG3/BMPER/FREM2/HES5	39
BP	GO:0050803	regulation of synapse structure or activity	39/1133	227/18670	3.34336e-09	5.36907e-07	4.04074e-07	ASIC2/APOE/ADGRB3/CDH8/DGKB/EPHA4/EPHA7/EPHB1/GHSR/IL10/NFATC4/NTRK2/NTRK3/PCDH8/RELN/PTK2/PTN/PTPRD/PTPRS/ROBO2/SIX1/WNT5A/KALRN/NLGN1/ARHGEF15/DKK1/FLRT3/FLRT2/SLITRK5/SIX4/SYBU/LRFN2/LRRN1/CAMKV/CTTNBP2/CBLN2/DAB2IP/LRRTM3/SHISA7	39
BP	GO:0034329	cell junction assembly	39/1133	241/18670	1.87121e-08	1.85673e-06	1.39737e-06	ANK2/APOD/CAV1/CDH1/CDH5/CDH6/CDH8/CDH9/CDH10/CDH11/CDH15/COL16A1/EPHA2/CTTN/DMTN/EPHA3/GJA1/GJA5/GJB2/KDR/PTK2/PTPRK/S100A10/SFRP1/SNAI2/THY1/TJP1/UGT8/PATJ/RAMP2/CORO2B/LIMCH1/EPB41L3/RHOD/CDH22/POF1B/PHLDB2/FRMPD2/OCLN	39
BP	GO:0043010	camera-type eye development	39/1133	314/18670	1.70055e-05	0.000436254	0.000328323	ACHE/BMP4/COL4A1/COL8A1/EGFR/EPHA2/EPHB1/FAT1/EFEMP1/FOXF2/FOXC1/GJA1/NTRK2/NTRK3/PDGFRA/PITX2/PTN/RORB/SOX1/SOX9/TBX2/THRB/THY1/TUB/TWIST1/WNT5A/WNT7B/FZD4/ARHGEF15/TSPAN12/FJX1/VAX2/TSKU/RHOJ/BCL11B/OSR2/SDK1/RD3/HES5	39
BP	GO:0009914	hormone transport	39/1133	322/18670	3.0218e-05	0.000673375	0.000506778	ADRA2C/AGTR1/CACNA1E/CNR1/CRH/CRYM/EDN3/EGFR/GHSR/GJA1/FFAR3/IFNG/INHBB/KCNA5/KCNJ11/MC4R/NOS2/PRKN/SFRP1/SLC16A2/SNAP25/ABCC8/TBX3/FZD4/KALRN/ADIPOQ/STXBP5L/CPLX1/NMU/PCLO/GAL/SLCO1C1/ANO1/SYBU/G6PC2/C1QTNF1/ACVR1C/SELENOM/SLC30A8	39
BP	GO:0007178	transmembrane receptor protein serine/threonine kinase signaling pathway	39/1133	349/18670	0.000173584	0.00257148	0.00193528	BMP3/BMP4/BMP5/CAV1/CDH5/COL1A2/COL3A1/DLX5/FGF9/FMOD/LRRC32/GDF2/INHBB/LTBP2/MYH6/NEO1/ROR2/HTRA1/PTK2/PTPRK/RYR2/SFRP1/SFRP2/TGFBR3/WNT5A/ITGA8/CHRD/FST/FSTL1/DKK1/SULF1/SOSTDC1/WWTR1/TMEM100/PRDM16/GREM2/ACVR1C/BMPER/HES5	39
BP	GO:0051480	regulation of cytosolic calcium ion concentration	39/1133	357/18670	0.000276663	0.00374028	0.00281491	AGTR1/APLNR/ANK2/FASLG/C3AR1/CACNA2D1/CALB2/CAV1/CNR1/EDNRA/GJA1/GPR4/XCR1/HTR1B/HTR2A/IL2/CXCR1/KCNA5/LCK/CXCL9/PDGFRA/RYR2/CCL1/XCL1/CX3CL1/THY1/TRPC1/TRPC3/TRPC6/WNT5A/TRPA1/TSPOAP1/TRDN/NMU/MCOLN3/JPH1/RIC3/C1QTNF1/MCOLN2	39
BP	GO:0031346	positive regulation of cell projection organization	39/1133	383/18670	0.00108945	0.0103982	0.00782566	APOE/BMP5/CNR1/DPYSL3/EPHA3/EPHA4/IL2/LCN2/NEFL/NGFR/NTRK2/NTRK3/PRKN/PRKD1/RELN/PTN/PTPRD/ROBO1/ROBO2/CX3CL1/CXCL12/CLRN1/WNT5A/FZD4/KALRN/SLIT2/NCKAP1/STMN2/NLGN1/SHANK2/COBL/NEDD4L/PACSIN1/TENM2/CPNE5/NDNF/ESPN/NAV3/DAB2IP	39
BP	GO:0043547	positive regulation of GTPase activity	39/1133	405/18670	0.00297682	0.0223964	0.0168554	ADRB1/ALDH1A1/ADGRB3/EPHA2/GNAO1/NTRK3/RAP1GAP/RGS7/RGS16/S100A10/CCL1/CCL8/CCL14/CCL16/CCL18/CCL23/XCL1/CX3CL1/SFRP1/XCL2/THY1/WNT5A/RGS5/KALRN/ARHGAP29/STXBP5L/RGS6/ARHGEF15/DOCK9/ASAP3/ARHGAP28/PREX2/ARHGAP39/SYDE2/AGAP1/SGSM1/ARHGAP42/DAB2IP/USP17L2	39
BP	GO:0006816	calcium ion transport	39/1133	434/18670	0.00928512	0.0537188	0.0404285	APLNR/ANK2/FASLG/CACNA1E/CACNA2D1/CAV1/CLCA1/CRH/CCN2/FGF14/GEM/GJA1/GNAO1/HTR2A/LCK/CXCL9/PDGFB/RYR2/CCL8/XCL1/CX3CL1/CXCL12/STAC/STC1/THY1/TRPC1/TRPC3/TRPC6/STC2/CACNA1I/TRPA1/NOS1AP/RAMP2/TRDN/CACNG4/MCOLN3/JPH1/BHLHA15/MCOLN2	39
KEGG	hsa04080	Neuroactive ligand-receptor interaction	39/528	341/8076	0.000402205	0.0128259	0.0116663	ADRA2C/ADRB1/AGTR1/APLNR/C3AR1/CHRM3/CNR1/CRH/EDN3/EDNRA/GABRA2/GABRB2/GABRB3/GABRD/GABRE/GABRG2/GHR/GHSR/UTS2R/GRIA3/GRID1/GRIK4/GRM8/HTR1B/HTR2A/MC4R/NPY/PRSS1/PRSS2/TAC3/THRB/TSHB/INSL5/NMU/UTS2/GAL/CYSLTR2/NPFFR1/UTS2B	39
MF	GO:0015077	monovalent inorganic cation transmembrane transporter activity	38/1117	382/17697	0.00369734	0.0364514	0.0296245	ASIC2/ATP1A4/ATP1B2/CLCN4/GRIK4/KCNA2/KCNA3/KCNA5/KCNH2/KCNJ3/KCNJ11/KCNJ15/KCNK1/KCNN3/KCNQ3/SCN3A/SCNN1B/SLC1A1/SLC6A1/SLC6A2/SLC6A8/SLC6A9/SLC10A2/SLC12A3/SLC22A3/SNAP25/ABCC8/SLC4A4/ABCC9/SLC17A2/SLC17A3/ASIC4/KCNK15/LRRC38/SLC5A12/SLC6A19/KCNT2/KCNE1B	38
BP	GO:0050807	regulation of synapse organization	38/1133	218/18670	3.50229e-09	5.41722e-07	4.07697e-07	ASIC2/APOE/ADGRB3/CDH8/DGKB/EPHA4/EPHA7/EPHB1/GHSR/IL10/NFATC4/NTRK2/NTRK3/PCDH8/RELN/PTK2/PTN/PTPRD/PTPRS/ROBO2/SIX1/WNT5A/KALRN/NLGN1/ARHGEF15/DKK1/FLRT3/FLRT2/SLITRK5/SIX4/LRFN2/LRRN1/CAMKV/CTTNBP2/CBLN2/DAB2IP/LRRTM3/SHISA7	38
BP	GO:0043270	positive regulation of ion transport	38/1133	275/18670	1.75325e-06	7.68362e-05	5.78265e-05	APLNR/ANK2/APOE/ATP1B2/CACNA2D1/CAV1/CRH/EDN3/FGF12/FGF14/GDNF/HTR3A/IFNG/KCNH2/KCNJ11/CXCL9/PDGFB/RELN/RAB3B/RYR2/XCL1/CX3CL1/CXCL12/SLC6A1/STAC/STC1/THY1/TRPC1/TRPC3/TRPC6/NOS1AP/TRDN/PLA2R1/CACNG4/GAL/WNK2/LRRC38/ERFE	38
BP	GO:0007411	axon guidance	38/1133	276/18670	1.91702e-06	8.26359e-05	6.21913e-05	DCC/DLX5/EPHA2/EPHA3/EPHA4/EPHA7/EPHB1/ETV1/GDNF/GFRA1/GFRA3/GLI2/KIF5A/NEO1/NFIB/RELN/PTK2/RAP1GAP/ROBO1/ROBO2/CXCL12/SLIT3/SPTA1/SPTB/WNT5A/UNC5C/SLIT2/NRXN3/SEMA3C/CHL1/FLRT3/FLRT2/SEMA5B/ENAH/BCL11B/SEMA6D/DOK6/EPHA10	38
BP	GO:0097485	neuron projection guidance	38/1133	277/18670	2.09487e-06	8.95686e-05	6.74089e-05	DCC/DLX5/EPHA2/EPHA3/EPHA4/EPHA7/EPHB1/ETV1/GDNF/GFRA1/GFRA3/GLI2/KIF5A/NEO1/NFIB/RELN/PTK2/RAP1GAP/ROBO1/ROBO2/CXCL12/SLIT3/SPTA1/SPTB/WNT5A/UNC5C/SLIT2/NRXN3/SEMA3C/CHL1/FLRT3/FLRT2/SEMA5B/ENAH/BCL11B/SEMA6D/DOK6/EPHA10	38
BP	GO:0060326	cell chemotaxis	38/1133	304/18670	1.87929e-05	0.000472769	0.000355803	AGTR1/C3AR1/EDN3/EPHA2/EPHB1/FLT1/XCR1/CXCR1/IL10/KDR/LBP/MET/CXCL9/PDGFB/PDGFRA/PRKD1/LGMN/PTN/CCL1/CCL8/CCL14/CCL16/CCL18/CCL23/XCL1/CX3CL1/CXCL12/XCL2/VCAM1/VEGFC/WNT5A/SLIT2/CXCL14/BCAR1/PADI2/IL36A/PARVA/SMOC2	38
BP	GO:0070371	ERK1 and ERK2 cascade	38/1133	317/18670	4.76782e-05	0.000962512	0.000724381	APOE/CEACAM1/BMP4/CHI3L1/CCN2/EGFR/EPHA2/EPHA7/EPHB1/ERBB4/FBLN1/FLT1/HTR2A/KDR/PDGFB/PDGFRA/ROS1/CCL1/CCL8/CCL14/CCL16/CCL18/CCL23/XCL1/CX3CL1/SOX9/XCL2/TIMP3/ADIPOQ/AKAP12/RPS6KA6/SLC30A10/IL26/WNK2/DUSP26/DAB2IP/BMPER/OR2AT4	38
CC	GO:0099699	integral component of synaptic membrane	38/1188	152/19717	3.05708e-14	5.00342e-12	3.84012e-12	ADRA2C/CDH9/CDH10/CHRM3/CNR1/DCC/EPHA4/EPHA7/ERBB4/GABRB2/GABRD/GHSR/GRID1/GRIK4/HTR1B/HTR2A/HTR3A/KCNA2/KCNA3/KCNJ3/NTRK3/PCDH8/PTPRS/SLC6A1/SLC6A9/ADAM23/PLPPR4/NLGN1/SORCS3/FLRT3/CACNG4/PCDH17/LRFN2/LRRC4C/CADM3/SYT6/LRRTM3/SHISA7	38
CC	GO:0005938	cell cortex	38/1188	308/19717	2.17754e-05	0.000288966	0.000221781	RND3/CALB2/CALD1/CAV1/CDH1/CRIP2/CCN2/CTTN/EPB42/DMTN/GAD1/MYO1D/MYO6/MYO10/NOS2/PTK2/PVALB/SLC4A1/SPTA1/SPTB/AKAP12/FRMPD1/COBL/RAI14/PCLO/RHOD/CLIC5/SEPTIN3/FMN2/RHOJ/ACTL8/HMCN1/CTTNBP2/PHLDB2/PARD3B/PLEKHH2/SEPTIN10/MYZAP	38
CC	GO:0099572	postsynaptic specialization	38/1188	348/19717	0.000291081	0.00269662	0.00206966	ADD2/ADRA2C/CDH10/CHRM3/CNN3/DCC/DLG3/DMTN/EPHA4/EPHA7/ERBB4/GABRB2/GRID1/MAP2/NTRK2/PTPRS/SLC6A9/SPOCK1/SYN3/ITGA8/MPDZ/DCLK1/PLPPR4/NLGN4Y/NLGN1/SHANK2/SORCS3/EPB41L3/CACNG4/PCLO/LRFN2/NLGN4X/LRRC4C/CPEB1/TMEM108/LRRTM3/RGS7BP/SHISA7	38
MF	GO:0008201	heparin binding	37/1117	169/17697	1.91837e-11	2.67932e-09	2.17752e-09	APOB/APOE/BMP4/COL5A1/COL11A1/CCN2/F11/FGF9/LTBP2/LTF/MMP7/NELL2/PRELP/PTN/PTPRS/CCL8/CCL23/SFRP1/SLIT3/TGFBR3/TNXB/CHRD/CCN5/CCN4/SLIT2/LIPG/POSTN/FSTL1/COL5A3/SMOC2/GREM2/NDNF/MPIG6B/RSPO3/NAV2/RSPO1/RSPO2	37
MF	GO:0008509	anion transmembrane transporter activity	37/1117	327/17697	0.000416103	0.00721671	0.0058651	CEACAM1/CLCA1/CLCN4/GABRA2/GABRB2/GABRB3/GABRD/GABRE/GABRG2/SLC1A1/SLC1A7/SLC4A1/SLC6A1/SLC6A2/SLC6A8/SLC6A9/SLC10A2/SLC12A3/SLC16A2/SLCO2A1/SLC22A3/SLC4A4/SLC17A2/SLC17A3/SLC22A7/SLCO2B1/CLIC5/SLCO1C1/ANO1/SLC7A10/SLC7A3/SLC51B/SLC2A14/BEST3/SLC16A14/SLC5A12/SLC6A19	37
BP	GO:0060541	respiratory system development	37/1133	198/18670	7.6775e-10	1.83527e-07	1.38121e-07	ARG1/ASCL1/ASS1/BMP4/CHI3L1/CRH/CCN2/DLX5/EDA/EGFR/EPAS1/FGF9/GLI2/FOXA1/HOXA5/TNC/IGFBP5/MME/NFIB/PDGFRA/PGR/PHEX/PTN/SIX1/SOX9/THRB/WNT5A/WNT7B/MSC/ADAMTS2/YAP1/PDPN/ZFPM2/SIX4/PKDCC/CCBE1/RSPO2	37
BP	GO:0070372	regulation of ERK1 and ERK2 cascade	37/1133	300/18670	3.23342e-05	0.000717491	0.00053998	APOE/CEACAM1/BMP4/CHI3L1/CCN2/EGFR/EPHA2/EPHA7/EPHB1/ERBB4/FBLN1/FLT1/HTR2A/KDR/PDGFB/PDGFRA/ROS1/CCL1/CCL8/CCL14/CCL16/CCL18/CCL23/XCL1/CX3CL1/XCL2/TIMP3/ADIPOQ/AKAP12/RPS6KA6/SLC30A10/IL26/WNK2/DUSP26/DAB2IP/BMPER/OR2AT4	37
BP	GO:0010631	epithelial cell migration	37/1133	351/18670	0.000769928	0.00801792	0.00603425	ANXA3/APOE/CEACAM1/BMP4/DCN/EPHA2/FAP/GDF2/IFNG/KDR/MET/MMP9/PDGFB/PRKD1/LGMN/PTK2/PTN/PTPRG/ROBO1/SOX9/STC1/NR2F2/VEGFC/WNT5A/SLIT2/BCAR1/SASH1/EPB41L4B/ADAMTS9/RHOJ/SMOC2/MMRN2/EPPK1/CCBE1/DAB2IP/CLEC14A/BMPER	37
BP	GO:0090132	epithelium migration	37/1133	354/18670	0.000900641	0.00902351	0.00679105	ANXA3/APOE/CEACAM1/BMP4/DCN/EPHA2/FAP/GDF2/IFNG/KDR/MET/MMP9/PDGFB/PRKD1/LGMN/PTK2/PTN/PTPRG/ROBO1/SOX9/STC1/NR2F2/VEGFC/WNT5A/SLIT2/BCAR1/SASH1/EPB41L4B/ADAMTS9/RHOJ/SMOC2/MMRN2/EPPK1/CCBE1/DAB2IP/CLEC14A/BMPER	37
BP	GO:0090130	tissue migration	37/1133	360/18670	0.00122177	0.0113121	0.00851345	ANXA3/APOE/CEACAM1/BMP4/DCN/EPHA2/FAP/GDF2/IFNG/KDR/MET/MMP9/PDGFB/PRKD1/LGMN/PTK2/PTN/PTPRG/ROBO1/SOX9/STC1/NR2F2/VEGFC/WNT5A/SLIT2/BCAR1/SASH1/EPB41L4B/ADAMTS9/RHOJ/SMOC2/MMRN2/EPPK1/CCBE1/DAB2IP/CLEC14A/BMPER	37
BP	GO:0042692	muscle cell differentiation	37/1133	385/18670	0.00387558	0.0272119	0.0204795	ANK2/ADGRB3/BMP4/CDH15/FGF9/IGF2/IGFBP5/KEL/LMNA/CXCL9/MYBPC2/MYF6/MYH6/NFATC4/PDGFB/PDGFRA/RORA/SORT1/SDC1/SGCD/SIX1/SOX9/TBX2/TBX3/UCHL1/XK/ITGA8/RAMP2/DKK1/HEY1/HEY2/SIX4/SOX6/CYP26B1/MYO18B/BHLHA15/TMEM119	37
BP	GO:1903532	positive regulation of secretion by cell	37/1133	399/18670	0.00686349	0.0424538	0.0319505	ACHE/CNR1/CRH/EDN3/EGFR/GDNF/GJA1/IFNG/IL2/IL10/INHBB/MMP8/ORM1/PAEP/CCL1/SDC1/CXCL12/TWIST1/VEGFC/WNT5A/CACNA1I/AKAP12/POSTN/NMU/NLGN1/EXPH5/GAL/ANO1/SYBU/IL26/CD177/WLS/TSLP/IL33/CADPS2/C1QTNF1/SLC30A8	37
BP	GO:0010876	lipid localization	37/1133	400/18670	0.00713588	0.0435355	0.0327646	AGTR1/APOB/APOC1/APOD/APOE/CEACAM1/CAV1/CRH/FABP6/LBP/NOS2/PRKN/ENPP1/PRKAA2/SLC10A2/SLCO2A1/FZD4/LRAT/ADIPOQ/LIPG/ABCA9/ABCA8/SLCO2B1/PLA2R1/ABCA6/OSBP2/GAL/SLCO1C1/SPX/OSBPL6/C1QTNF1/SLC51B/ACVR1C/SELENOM/ERFE/ABCA13/SFTPA1	37
BP	GO:0043588	skin development	37/1133	419/18670	0.0142867	0.0745728	0.0561231	COL1A1/COL1A2/COL3A1/COL5A1/DSC1/DSP/EDA/EGFR/EPHA2/FOXC1/HOXA7/IGFBP5/IRF6/KRT1/KRT13/MET/SOX9/WNT5A/LDB2/ADAMTS2/YAP1/FST/SOX21/DKK1/EXPH5/SOSTDC1/SLITRK5/GRHL1/COL5A3/GAL/LGR4/CYP26B1/PERP/BCL11B/FA2H/FRAS1/WNT10A	37
CC	GO:0098984	neuron to neuron synapse	37/1188	350/19717	0.00064457	0.00514061	0.00394541	ADD2/ADRA2C/CHRM3/CNN3/DCC/DLG3/DMTN/EPHA4/EPHA7/ERBB4/GRID1/GRIK4/MAP2/NTRK2/PTPRS/SLC6A9/SPOCK1/SYN3/ITGA8/MPDZ/DCLK1/PLPPR4/NLGN4Y/NLGN1/SHANK2/SORCS3/EPB41L3/CACNG4/PCLO/LRFN2/NLGN4X/LRRC4C/CPEB1/TMEM108/LRRTM3/RGS7BP/SHISA7	37
BP	GO:0007156	homophilic cell adhesion via plasma membrane adhesion molecules	36/1133	168/18670	2.30936e-11	8.7268e-09	6.56775e-09	ANXA3/CEACAM1/CDH1/CDH5/CDH6/CDH8/CDH9/CDH10/CDH11/CDH15/DSC1/FAT1/PCDH1/PCDH8/ROBO1/ROBO2/PCDHB5/PCDH17/PCDH18/DCHS2/PCDHGA3/PCDHB7/PCDHB6/PCDHB4/PCDHA11/PCDHA5/PCDHA3/CADM3/CDH22/FAT4/NECTIN4/HMCN1/IGSF21/CDHR1/FAT3/SDK1	36
BP	GO:0001763	morphogenesis of a branching structure	36/1133	196/18670	2.115e-09	3.7076e-07	2.79032e-07	BMP4/COL4A1/EDNRA/EPHA2/EPHA7/GDF2/GDNF/GLI2/FOXA1/HOXA5/HOXA11/HOXB7/TNC/IL10/MET/NFATC4/PBX1/PGR/SFRP1/SFRP2/SIX1/SNAI2/SOX9/TBX3/WNT5A/SLIT2/YAP1/SEMA3C/SIX2/SULF1/SIX4/RASIP1/LGR4/FAT4/RSPO3/RSPO2	36
BP	GO:0001649	osteoblast differentiation	36/1133	225/18670	8.79434e-08	6.9029e-06	5.19509e-06	ACHE/ALPL/BMP3/BMP4/COL1A1/DLX5/EPHA2/FGF9/GDF2/GJA1/GLI2/TNC/IBSP/ID3/ID4/IGF2/IGFBP3/IGFBP5/LTF/DDR2/PRKD1/PTK2/RORB/SFRP1/SFRP2/SNAI2/TWIST1/WNT7B/CHRD/CCN4/WWTR1/LGR4/TP53INP2/SMOC1/TMEM119/RSPO2	36
BP	GO:2000027	regulation of animal organ morphogenesis	36/1133	253/18670	1.63029e-06	7.27454e-05	5.47478e-05	CEACAM1/BMP4/FOXC1/GDNF/HOXA11/HOXB7/MLLT3/NFIB/ROR1/ROR2/PAX9/PTN/ROBO1/ROBO2/SFRP1/SFRP2/SIX1/SNAI2/SOX9/TBX2/THRB/TWIST1/WNT5A/FZD4/GPC6/SEMA3C/SIX2/DKK1/SULF1/SIX4/LGR4/AJAP1/SOX17/WNT10A/RSPO3/RSPO2	36
BP	GO:0007162	negative regulation of cell adhesion	36/1133	289/18670	3.32525e-05	0.000725622	0.000546099	APOD/ARG1/ASS1/CEACAM1/BMP4/CDH1/COL1A1/CTLA4/DMTN/FBLN1/LRRC32/HOXA7/TNC/IL2/IL10/LGALS1/PRKG1/PTK2/XCL1/CX3CL1/CXCL12/SNAI2/SPOCK1/PRDX2/FZD4/ADIPOQ/CORO2B/POSTN/VSIG4/AJAP1/PHLDB2/C1QTNF1/CCM2L/ADAMTS18/NEXMIF/TARM1	36
BP	GO:0046879	hormone secretion	36/1133	312/18670	0.000161943	0.00245338	0.0018464	ADRA2C/AGTR1/CACNA1E/CNR1/CRH/EDN3/EGFR/GHSR/GJA1/FFAR3/IFNG/INHBB/KCNA5/KCNJ11/MC4R/NOS2/PRKN/SFRP1/SNAP25/ABCC8/TBX3/FZD4/KALRN/ADIPOQ/STXBP5L/CPLX1/NMU/PCLO/GAL/ANO1/SYBU/G6PC2/C1QTNF1/ACVR1C/SELENOM/SLC30A8	36
BP	GO:0051098	regulation of binding	36/1133	373/18670	0.00405956	0.027944	0.0210305	ADD2/APOE/BMP4/CAV1/EPHA4/FOXC1/HOXA3/ID3/ID4/IFNG/IL10/MAP2/MET/MMP8/MMP9/NFATC4/PRKN/PDGFB/S100A10/CCL23/SPTA1/TGFBR3/PHLDA2/TWIST1/WNT5A/HMGA2/ADIPOQ/SPON1/DKK1/HEY1/HEY2/PRMT8/GREM2/ARHGAP28/CCM2L/DAB2IP	36
BP	GO:0030099	myeloid cell differentiation	36/1133	416/18670	0.0204864	0.0978548	0.073645	ALAS2/CEACAM1/BMP4/CAMK4/EPHA2/EPAS1/EPB42/DMTN/HOXA5/HOXA7/HOXA9/HOXB7/HOXB8/IFNG/LTF/MB/MMP9/ROR2/RHAG/SFRP1/SLC4A1/TAL1/TGFBR3/H3C1/CCN4/ADIPOQ/TRIM10/KLF1/AHSP/SOX6/MPIG6B/PRXL2A/IL34/IL23R/NKX2-3/ADGRF5	36
CC	GO:0045121	membrane raft	36/1188	315/19717	0.000171669	0.0017934	0.00137643	ADCY2/ADD2/ANK2/FASLG/CAV1/CD8A/CDH1/CDH15/CNR1/EGFR/EPHB1/GHSR/GJA1/HTR2A/KCNA3/KCNA5/KDR/LCK/MAL/MME/MYO1D/OLR1/PTGIS/S100A10/SLC6A2/THY1/MALL/NOS1AP/PDPN/SULF1/ASAH2/CD177/PLVAP/STOML3/FYB2/GASK1A	36
CC	GO:0098857	membrane microdomain	36/1188	316/19717	0.000182792	0.00186981	0.00143508	ADCY2/ADD2/ANK2/FASLG/CAV1/CD8A/CDH1/CDH15/CNR1/EGFR/EPHB1/GHSR/GJA1/HTR2A/KCNA3/KCNA5/KDR/LCK/MAL/MME/MYO1D/OLR1/PTGIS/S100A10/SLC6A2/THY1/MALL/NOS1AP/PDPN/SULF1/ASAH2/CD177/PLVAP/STOML3/FYB2/GASK1A	36
CC	GO:0014069	postsynaptic density	36/1188	324/19717	0.000297786	0.00270764	0.00207811	ADD2/ADRA2C/CHRM3/CNN3/DCC/DLG3/DMTN/EPHA4/EPHA7/ERBB4/GRID1/MAP2/NTRK2/PTPRS/SLC6A9/SPOCK1/SYN3/ITGA8/MPDZ/DCLK1/PLPPR4/NLGN4Y/NLGN1/SHANK2/SORCS3/EPB41L3/CACNG4/PCLO/LRFN2/NLGN4X/LRRC4C/CPEB1/TMEM108/LRRTM3/RGS7BP/SHISA7	36
CC	GO:0032279	asymmetric synapse	36/1188	328/19717	0.000376605	0.00329767	0.00253096	ADD2/ADRA2C/CHRM3/CNN3/DCC/DLG3/DMTN/EPHA4/EPHA7/ERBB4/GRID1/MAP2/NTRK2/PTPRS/SLC6A9/SPOCK1/SYN3/ITGA8/MPDZ/DCLK1/PLPPR4/NLGN4Y/NLGN1/SHANK2/SORCS3/EPB41L3/CACNG4/PCLO/LRFN2/NLGN4X/LRRC4C/CPEB1/TMEM108/LRRTM3/RGS7BP/SHISA7	36
CC	GO:0098589	membrane region	36/1188	328/19717	0.000376605	0.00329767	0.00253096	ADCY2/ADD2/ANK2/FASLG/CAV1/CD8A/CDH1/CDH15/CNR1/EGFR/EPHB1/GHSR/GJA1/HTR2A/KCNA3/KCNA5/KDR/LCK/MAL/MME/MYO1D/OLR1/PTGIS/S100A10/SLC6A2/THY1/MALL/NOS1AP/PDPN/SULF1/ASAH2/CD177/PLVAP/STOML3/FYB2/GASK1A	36
MF	GO:0005125	cytokine activity	35/1117	220/17697	3.84684e-07	2.47973e-05	2.01531e-05	FASLG/BMP3/BMP4/BMP5/CD40LG/GDF2/IFNG/IL2/IL7/IL10/INHBB/CXCL9/CCL1/CCL8/CCL14/CCL16/CCL18/CCL23/XCL1/CX3CL1/CXCL12/XCL2/WNT5A/ADIPOQ/CXCL14/EBI3/TAFA5/IL36A/IL22/IL26/GREM2/TSLP/IL33/IL34/C17orf99	35
MF	GO:0005126	cytokine receptor binding	35/1117	286/17697	0.000132045	0.00263461	0.00214118	FASLG/BMP3/BMP4/BMP5/CD40LG/CDH5/EDA/GDF2/IFNG/IL2/IL7/IL10/INHBB/LIFR/CXCL9/CCL1/CCL8/CCL14/CCL16/CCL18/CCL23/XCL1/CX3CL1/CXCL12/XCL2/TGFBR3/VEGFC/CXCL14/EBI3/IL36A/IL22/TSLP/IL34/IL23R/DAB2IP	35
BP	GO:0061138	morphogenesis of a branching epithelium	35/1133	182/18670	9.89871e-10	2.18726e-07	1.64612e-07	BMP4/COL4A1/EDNRA/EPHA2/GDF2/GDNF/GLI2/FOXA1/HOXA5/HOXA11/HOXB7/TNC/IL10/MET/NFATC4/PBX1/PGR/SFRP1/SFRP2/SIX1/SNAI2/SOX9/TBX3/WNT5A/SLIT2/YAP1/SEMA3C/SIX2/SULF1/SIX4/RASIP1/LGR4/FAT4/RSPO3/RSPO2	35
BP	GO:0010810	regulation of cell-substrate adhesion	35/1133	215/18670	8.54812e-08	6.85492e-06	5.15897e-06	APOD/COL1A1/COL8A1/COL16A1/DMTN/EPHA3/FBLN1/HOXA7/KDR/LGALS1/DDR2/VIT/PTK2/PTN/S100A10/CX3CL1/SFRP1/SPOCK1/THY1/FZD4/CORO2B/OLFM4/PDPN/POSTN/LIMCH1/EGFL6/RHOD/AJAP1/SMOC2/NDNF/MMRN2/PHLDB2/EMILIN3/EGFLAM/NEXMIF	35
BP	GO:0007160	cell-matrix adhesion	35/1133	225/18670	2.67412e-07	1.85042e-05	1.39262e-05	APOD/COL3A1/COL16A1/CCN2/EDA/CTTN/DMTN/EPHA3/HOXA7/KDR/MUC4/DDR2/PTK2/PTPRK/S100A10/CX3CL1/SFRP1/THY1/VCAM1/PPFIA2/ITGA8/ITGBL1/MSLN/CORO2B/POSTN/LYVE1/LIMCH1/RHOD/COL5A3/AJAP1/ADAMTS9/PHLDB2/FREM1/NEXMIF/VWA2	35
BP	GO:0045665	negative regulation of neuron differentiation	35/1133	225/18670	2.67412e-07	1.85042e-05	1.39262e-05	APOE/ASCL1/DCC/DPYSL3/EPHA4/EPHA7/FGF13/ID3/ID4/LGALS1/MAP2/NFATC4/NGFR/PBX1/PTK2/PTPRG/PTPRS/SOX9/SPOCK1/NR2F1/THRB/THY1/TRPC6/WNT5A/SLIT2/OLIG2/SEMA3C/STMN2/NLGN1/ZNF365/DKK1/HEY1/SEMA5B/SEMA6D/HES5	35
BP	GO:0060560	developmental growth involved in morphogenesis	35/1133	235/18670	7.71224e-07	4.24694e-05	3.19623e-05	APOE/BMP4/DCC/CTTN/EPHA7/FGF13/TNC/MAP2/NTRK3/PRKN/PTPRS/CXCL12/SFRP1/SFRP2/SIX1/SLIT3/SOX9/TBX2/WNT5A/WNT7B/DCLK1/SLIT2/YAP1/OLFM1/SEMA3C/POSTN/COBL/NEDD4L/FLRT3/GAL/SIX4/SEMA5B/CPNE5/TMEM108/SEMA6D	35
BP	GO:0022898	regulation of transmembrane transporter activity	35/1133	268/18670	1.55609e-05	0.000411229	0.000309489	ANK2/ANXA3/ATP1B2/CACNA2D1/CAV1/CRH/DLG3/FGF12/FGF14/GEM/GJA1/GRIA3/HTR3A/IFNG/KCNJ11/MMP9/NEFL/RELN/RYR2/STAC/TRPC6/TWIST1/NOS1AP/TRDN/NLGN1/SHANK2/NEDD4L/CACNG4/GAL/JPH1/WNK2/LRRC38/PM20D1/SHISA7/KCNE1B	35
BP	GO:0032409	regulation of transporter activity	35/1133	283/18670	4.93875e-05	0.000991332	0.000746071	ANK2/ANXA3/ATP1B2/CACNA2D1/CAV1/CRH/DLG3/FGF12/FGF14/GEM/GJA1/GRIA3/HTR3A/IFNG/KCNJ11/MMP9/NEFL/RELN/RYR2/STAC/TRPC6/TWIST1/NOS1AP/TRDN/NLGN1/SHANK2/NEDD4L/CACNG4/GAL/JPH1/WNK2/LRRC38/PM20D1/SHISA7/KCNE1B	35
BP	GO:0060828	regulation of canonical Wnt signaling pathway	35/1133	286/18670	6.13725e-05	0.00116941	0.000880094	APOE/CAV1/COL1A1/DLX5/EDA/EGFR/FGF9/GPC5/FRZB/IGFBP4/MLLT3/ROR2/PRKN/SFRP1/SFRP2/SNAI2/SOX9/WNT5A/TBX18/YAP1/DKK1/DAAM2/SOSTDC1/WWTR1/GPRC5B/LGR4/SOX17/WNK2/TLE6/WLS/RSPO3/TMEM198/DAB2IP/RSPO1/RSPO2	35
BP	GO:0010632	regulation of epithelial cell migration	35/1133	291/18670	8.73123e-05	0.00153058	0.00115191	ANXA3/APOE/CEACAM1/BMP4/DCN/EPHA2/GDF2/IFNG/KDR/MET/MMP9/PDGFB/PRKD1/LGMN/PTK2/PTN/PTPRG/SOX9/STC1/NR2F2/VEGFC/WNT5A/PLPP3/SLIT2/BCAR1/SASH1/EPB41L4B/ADAMTS9/RHOJ/SMOC2/MMRN2/EPPK1/CCBE1/DAB2IP/BMPER	35
BP	GO:0090287	regulation of cellular response to growth factor stimulus	35/1133	292/18670	9.3559e-05	0.00159359	0.00119933	BMP4/CAV1/CDH5/DCN/FGF9/FLT1/GDF2/NEO1/NTRK3/HTRA1/ROBO1/SFRP1/SFRP2/TGFBR3/VEGFC/WNT5A/FZD4/ITGA8/CHRD/SLIT2/FST/FSTL1/DKK1/SULF1/SOSTDC1/PRDM16/SMOC2/GREM2/TMEM108/MMRN2/CCBE1/DAB2IP/BMPER/SHISA2/HES5	35
BP	GO:0002237	response to molecule of bacterial origin	35/1133	343/18670	0.00184374	0.0158435	0.0119237	ALPL/APOB/FASLG/ARG1/ASS1/C4B/CD6/CNR1/CPS1/DCN/DEFA3/GHSR/GJA1/GJB2/IL10/LBP/LCN2/LTF/MAOB/CXCL9/MRC1/NOS2/PCK1/CX3CL1/PRDX2/VCAM1/WNT5A/AKAP12/GJB6/SASH1/IL36A/GNG12/PLSCR4/IL23R/DAB2IP	35
BP	GO:0006869	lipid transport	35/1133	365/18670	0.00504857	0.0334388	0.0251659	AGTR1/APOB/APOC1/APOD/APOE/CEACAM1/CAV1/CRH/FABP6/LBP/NOS2/PRKN/PRKAA2/SLC10A2/SLCO2A1/FZD4/LRAT/ADIPOQ/LIPG/ABCA9/ABCA8/SLCO2B1/PLA2R1/ABCA6/OSBP2/GAL/SLCO1C1/SPX/OSBPL6/C1QTNF1/SLC51B/SELENOM/ERFE/ABCA13/SFTPA1	35
BP	GO:0001701	in utero embryonic development	35/1133	373/18670	0.00703274	0.043006	0.0323661	APOB/BMP5/EDNRA/EGFR/EPAS1/FOXC1/GJA1/GLI2/IGF2/IL10/LMX1B/MYH6/PDGFB/PDGFRA/TBX3/NR2F2/PHLDA2/TWIST1/WNT7B/ARNT2/ZFPM2/HEY1/HEY2/TMEM100/SOX6/SALL4/PPP4R4/SOX17/NXN/MYO18B/RSPO3/SPIC/RBM46/PLPP4/MYBPHL	35
MF	GO:0019838	growth factor binding	34/1117	137/17697	3.06443e-12	8.55996e-10	6.95678e-10	A2M/COL1A1/COL1A2/COL2A1/COL3A1/COL4A1/COL5A1/CCN2/EGFR/FLT1/LRRC32/GHR/IGFBP3/IGFBP4/IGFBP5/IL2RB/KDR/LIFR/LTBP2/NGFR/NTRK2/NTRK3/PDGFB/PDGFRA/HTRA1/PTN/SORT1/TGFBR3/CCN5/CCN4/OSMR/KL/ESM1/ACVR1C	34
BP	GO:0008217	regulation of blood pressure	34/1133	182/18670	3.75e-09	5.63465e-07	4.2406e-07	ASIC2/ADRB1/AGTR1/CNR1/COL1A2/CRH/EDN3/EDNRA/ENPEP/EPHX2/GJA1/GJA5/UTS2R/FFAR3/HBB/MME/MYH6/NOS2/NPY/NPR1/PDGFB/NR2F2/VEGFC/ADIPOQ/RAMP2/CORO2B/POSTN/NMU/UTS2/CYP4F12/SPX/NAV2/ARHGAP42/UTS2B	34
BP	GO:0048839	inner ear development	34/1133	192/18670	1.54021e-08	1.70154e-06	1.28057e-06	BMP4/COL2A1/COL11A1/DLX5/EPHA4/FGF9/FRZB/GABRB2/GABRB3/GJB2/GLI2/NTRK3/ROR1/ROR2/PRRX1/PVALB/SIX1/SOX9/CLRN1/WNT5A/ITGA8/SLC25A27/CXCL14/PLPPR4/GJB6/HEY2/SIX4/ESRP1/MCOLN3/FAT4/LRIG3/BMPER/FREM2/HES5	34
BP	GO:0015893	drug transport	34/1133	214/18670	2.36753e-07	1.68254e-05	1.26627e-05	ARG1/CNR1/CRH/GDNF/GHSR/GJA1/HBA1/HBA2/HBM/HBB/HBG2/HBQ1/HTR1B/HTR2A/KCNA2/MB/PRKN/RAB3B/RHAG/CXCL12/SLC1A1/SLC1A7/SLC6A2/SLC6A8/SLC6A9/SLC22A3/TCN2/FZD4/SLC17A3/GAL/SLC7A10/SLC19A3/SLC7A3/SYT6	34
BP	GO:0048762	mesenchymal cell differentiation	34/1133	219/18670	4.13717e-07	2.61377e-05	1.96711e-05	BMP4/BMP5/COL1A1/EDN3/EDNRA/EPHA3/ERBB4/FOXF2/FOXC1/FRZB/GDNF/FOXA1/PITX2/SFRP1/SFRP2/SNAI2/SOX9/TGFBR3/TWIST1/WNT5A/HMGA2/OLFM1/SEMA3C/PDPN/SIX2/HEY1/HEY2/WWTR1/SEMA5B/TMEM100/SEMA6D/WNT10A/PHLDB2/DAB2IP	34
BP	GO:0015850	organic hydroxy compound transport	34/1133	262/18670	2.34014e-05	0.000574493	0.00043236	ADRA2C/AGTR1/APOB/APOC1/APOE/CEACAM1/CAV1/CNR1/CRH/GDNF/GHSR/FFAR3/HTR1B/HTR2A/KCNA2/MAOB/PRKN/RAB3B/CXCL12/SLC6A2/SLC10A2/SLC22A3/ADIPOQ/LIPG/SLCO2B1/OSBP2/GAL/SLCO1C1/OSBPL6/C1QTNF1/SLC51B/SELENOM/SYT6/SLC5A12	34
BP	GO:0050890	cognition	34/1133	296/18670	0.000264674	0.00359944	0.00270892	APOE/ADGRB3/CAMK4/CNR1/CRH/EGFR/FGF13/AFF2/GHSR/HTR2A/MME/NFATC4/NTRK2/PRKN/LGMN/RELN/PTN/SLC6A1/SNAP25/TUSC3/ITGA8/KALRN/NRXN3/CHL1/C1QL1/NLGN4Y/SHANK2/DKK1/SORCS3/CNTNAP2/PAK5/NLGN4X/JAKMIP1/SHISA7	34
BP	GO:0007204	positive regulation of cytosolic calcium ion concentration	34/1133	319/18670	0.00101976	0.00983305	0.0074003	AGTR1/APLNR/ANK2/FASLG/C3AR1/CACNA2D1/CAV1/CNR1/EDNRA/GJA1/GPR4/XCR1/HTR2A/IL2/CXCR1/LCK/CXCL9/PDGFRA/RYR2/CCL1/XCL1/CX3CL1/THY1/TRPC1/TRPC3/TRPC6/TRPA1/TRDN/NMU/MCOLN3/JPH1/RIC3/C1QTNF1/MCOLN2	34
BP	GO:0046677	response to antibiotic	34/1133	327/18670	0.00155528	0.0137697	0.010363	ADCY2/ALPL/ARG1/CA3/CDO1/CNR1/COL1A1/CRH/GJB2/GNAO1/GPR37/HBA1/HBA2/HBB/HTR1B/HTR3A/TNC/ID3/IL2/IL10/KCNA5/LCN2/MAOB/MB/MET/NEFL/NTRK3/PDGFB/SDC1/TRPC6/VCAM1/IL18RAP/TRPA1/ADIPOQ	34
BP	GO:0032496	response to lipopolysaccharide	34/1133	330/18670	0.0018115	0.01566	0.0117856	ALPL/APOB/FASLG/ARG1/ASS1/CD6/CNR1/CPS1/DCN/DEFA3/GHSR/GJA1/GJB2/IL10/LBP/LCN2/LTF/MAOB/CXCL9/MRC1/NOS2/PCK1/CX3CL1/PRDX2/VCAM1/WNT5A/AKAP12/GJB6/SASH1/IL36A/GNG12/PLSCR4/IL23R/DAB2IP	34
BP	GO:0007159	leukocyte cell-cell adhesion	34/1133	337/18670	0.00255536	0.0202389	0.0152317	ADD2/ARG1/ASS1/CEACAM1/BMP4/CAV1/CD6/CD28/CD40LG/CTLA4/LRRC32/GLI2/IFNG/IGF2/IL2/IL7/IL7R/IL10/LCK/LGALS1/XCL1/CXCL12/SPTA1/PRDX2/THY1/VCAM1/EBI3/CLEC4M/VSIG4/ICOS/SIRPG/CD177/IL23R/TARM1	34
BP	GO:0060348	bone development	33/1133	217/18670	9.83776e-07	5.07223e-05	3.81734e-05	ALPL/BMP4/COL1A1/COL2A1/COL6A3/COL12A1/DLX5/FOXC1/GJA1/HOXA11/HOXB4/LTF/MATN3/MMP13/VIT/PHEX/PITX2/PLS3/SFRP2/SOX9/STC1/TAL1/TWIST1/CCN4/SULF1/CYP26B1/FAT4/MPIG6B/COL21A1/OSR2/FREM1/TMEM119/VWA2	33
BP	GO:0021537	telencephalon development	33/1133	251/18670	2.34866e-05	0.000574493	0.00043236	ANXA3/ASCL1/BMP4/COL3A1/DLX5/EGFR/ERBB4/FGF13/ID4/NEFL/NFIB/NPY/NTRK2/RELN/PTPRS/ROBO1/ROBO2/CXCL12/WNT5A/SLIT2/TACC2/NRG3/SYNE2/TSKU/CNTNAP2/SLITRK5/SALL3/GNG12/BCL11B/TMEM108/FAT4/DAB2IP/HES5	33
BP	GO:0010976	positive regulation of neuron projection development	33/1133	281/18670	0.000215195	0.00305043	0.00229574	APOE/BMP5/CNR1/DPYSL3/EPHA3/EPHA4/IL2/NEFL/NGFR/NTRK2/NTRK3/PRKN/PRKD1/RELN/PTN/PTPRD/ROBO1/ROBO2/CX3CL1/CXCL12/WNT5A/FZD4/KALRN/SLIT2/STMN2/NLGN1/SHANK2/COBL/NEDD4L/PACSIN1/CPNE5/NDNF/DAB2IP	33
BP	GO:0009410	response to xenobiotic stimulus	33/1133	292/18670	0.000433951	0.00524632	0.00394835	ARG1/ASS1/CDO1/CNR1/CPS1/CRH/CYP2C18/CYP2J2/EGFR/EPHX2/FMO2/FMO3/GHR/GHSR/GJB2/GNAO1/HTR1B/HTR2A/HTR3A/PCK1/PDGFB/PON3/RORA/RYR2/SLC6A1/TDO2/UGT2B15/ARNT2/CYP46A1/SLITRK5/CACNG4/CYP26B1/SDK1	33
BP	GO:0015849	organic acid transport	33/1133	333/18670	0.00386976	0.0272119	0.0204795	APOE/ARG1/CEACAM1/NOS2/NTRK2/PRKAA2/SLC1A1/SLC1A7/SLC6A1/SLC6A8/SLC6A9/SLC10A2/SLC16A2/SLCO2A1/SNAP25/XK/PPFIA2/TSPOAP1/SLC17A2/PDPN/SLC17A3/CPLX1/SLCO2B1/PLA2R1/SLCO1C1/SLC7A10/SPX/SLC7A3/SLC51B/ERFE/SLC16A14/SLC5A12/SLC6A19	33
BP	GO:0046942	carboxylic acid transport	33/1133	333/18670	0.00386976	0.0272119	0.0204795	APOE/ARG1/CEACAM1/NOS2/NTRK2/PRKAA2/SLC1A1/SLC1A7/SLC6A1/SLC6A8/SLC6A9/SLC10A2/SLC16A2/SLCO2A1/SNAP25/XK/PPFIA2/TSPOAP1/SLC17A2/PDPN/SLC17A3/CPLX1/SLCO2B1/PLA2R1/SLCO1C1/SLC7A10/SPX/SLC7A3/SLC51B/ERFE/SLC16A14/SLC5A12/SLC6A19	33
BP	GO:0036293	response to decreased oxygen levels	33/1133	370/18670	0.0174085	0.0867785	0.065309	ALAS2/CAV1/CLCA1/CCN2/EDNRA/EPAS1/KCNA5/LMNA/MB/NOS2/PCK1/PKLR/PLOD2/PTGIS/PTN/RORA/RYR2/CXCL12/SFRP1/STC1/TGFBR3/TRPC6/TWIST1/VCAM1/VEGFC/STC2/ADIPOQ/ARNT2/RAMP2/POSTN/FMN2/CPEB1/NDNF	33
CC	GO:0034703	cation channel complex	33/1188	220/19717	1.16219e-06	2.28255e-05	1.75185e-05	CACNA1E/CACNA2D1/DLG3/CTTN/GRIA3/GRIK4/HTR3A/KCNA2/KCNA3/KCNA5/KCNH2/KCNJ3/KCNJ11/KCNK1/KCNQ3/RYR2/SCN3A/SCNN1B/SNAP25/ABCC8/TRPC1/TRPC3/TRPC6/CACNA1I/NOS1AP/ABCC9/NLGN1/CNTNAP2/CACNG4/OLFM3/LRRC38/SHISA7/KCNE1B	33
CC	GO:0005769	early endosome	33/1188	350/19717	0.00734833	0.0398761	0.0306049	ADRB1/ANK2/APOB/APOE/CAV1/CLCN4/EGFR/EPHA3/EPHA4/EPHB1/ACKR1/GJA1/KDR/MME/MYO1D/NTRK2/SORT1/SLC1A1/TF/VCAM1/LIPG/DKK1/PARM1/CNTNAP2/LAMP3/RHOD/CD207/MAGEL2/MCOLN3/SLC30A10/TMEM108/WLS/STEAP2	33
BP	GO:0003018	vascular process in circulatory system	32/1133	173/18670	1.37698e-08	1.64432e-06	1.2375e-06	ASIC2/ADRA2C/ADRB1/AGTR1/APOE/CEACAM1/CAV1/CDH5/CHRM3/CPS1/EDN3/EDNRA/EGFR/EPHX2/FOXC1/GJA1/GJA5/UTS2R/HBB/HTR1B/HTR2A/KCNA5/KEL/NPR1/PRKG1/SLIT2/AKAP12/RAMP2/UTS2/ARHGAP42/C2CD4A/UTS2B	32
BP	GO:0048736	appendage development	32/1133	179/18670	3.21399e-08	2.86481e-06	2.15604e-06	BMP4/COL2A1/DLX5/FGF9/GJA1/GJA5/GLI2/HOXA9/HOXA10/HOXA11/ROR2/PBX1/PITX2/PRRX1/SFRP2/SOX9/TBX2/TBX3/NR2F2/TWIST1/WNT5A/SEMA3C/DKK1/SALL3/CYP26B1/SALL4/SMOC1/FRAS1/PKDCC/OSR2/RSPO2/FREM2	32
BP	GO:0060173	limb development	32/1133	179/18670	3.21399e-08	2.86481e-06	2.15604e-06	BMP4/COL2A1/DLX5/FGF9/GJA1/GJA5/GLI2/HOXA9/HOXA10/HOXA11/ROR2/PBX1/PITX2/PRRX1/SFRP2/SOX9/TBX2/TBX3/NR2F2/TWIST1/WNT5A/SEMA3C/DKK1/SALL3/CYP26B1/SALL4/SMOC1/FRAS1/PKDCC/OSR2/RSPO2/FREM2	32
BP	GO:0071229	cellular response to acid chemical	32/1133	209/18670	1.22844e-06	5.82016e-05	4.38022e-05	APOB/ASS1/COL1A1/COL1A2/COL3A1/COL4A1/COL16A1/CPS1/EGFR/EPHA3/FFAR3/TNC/ID3/KDR/NFATC4/NTRK2/NTRK3/PCK1/PDGFB/PDGFRA/PRKAA2/RORB/SFRP1/SIX1/SOX9/WNT5A/WNT7B/FZD4/YAP1/PID1/CYP26B1/CPEB1	32
BP	GO:0048863	stem cell differentiation	32/1133	257/18670	8.98237e-05	0.00156938	0.00118111	A2M/ASCL1/BMP4/EDN3/EDNRA/ERBB4/FOXC1/FRZB/GDNF/FOXA1/HOXA7/HOXB4/PDGFRA/PITX2/PTN/SFRP1/SNAI2/SOX9/TAL1/TBX2/TWIST1/HMGA2/YAP1/SEMA3C/SOX21/POU6F2/SEMA5B/SOX6/SOX17/SEMA6D/WNT10A/HES5	32
BP	GO:0032412	regulation of ion transmembrane transporter activity	32/1133	260/18670	0.000111958	0.00179683	0.00135228	ANK2/ANXA3/ATP1B2/CACNA2D1/CAV1/CRH/DLG3/FGF12/FGF14/GEM/GRIA3/HTR3A/IFNG/KCNJ11/MMP9/NEFL/RELN/RYR2/STAC/TRPC6/NOS1AP/TRDN/NLGN1/SHANK2/NEDD4L/CACNG4/GAL/JPH1/WNK2/LRRC38/SHISA7/KCNE1B	32
BP	GO:0071356	cellular response to tumor necrosis factor	32/1133	291/18670	0.000840493	0.00851667	0.0064096	APOB/ASS1/CD40LG/CHI3L1/COL1A1/EDA/KCNJ11/LCN2/PRKN/PCK1/RORA/CCL1/CCL8/CCL14/CCL16/CCL18/CCL23/XCL1/CX3CL1/SFRP1/XCL2/VCAM1/TCL1A/ADIPOQ/AKAP12/POSTN/TNFRSF13B/PID1/PLVAP/CCDC3/DAB2IP/OCLN	32
BP	GO:0034612	response to tumor necrosis factor	32/1133	312/18670	0.00260606	0.0203476	0.0153135	APOB/ASS1/CD40LG/CHI3L1/COL1A1/EDA/KCNJ11/LCN2/PRKN/PCK1/RORA/CCL1/CCL8/CCL14/CCL16/CCL18/CCL23/XCL1/CX3CL1/SFRP1/XCL2/VCAM1/TCL1A/ADIPOQ/AKAP12/POSTN/TNFRSF13B/PID1/PLVAP/CCDC3/DAB2IP/OCLN	32
BP	GO:0001666	response to hypoxia	32/1133	359/18670	0.0191165	0.0932596	0.0701867	ALAS2/CAV1/CLCA1/EDNRA/EPAS1/KCNA5/LMNA/MB/NOS2/PCK1/PKLR/PLOD2/PTGIS/PTN/RORA/RYR2/CXCL12/SFRP1/STC1/TGFBR3/TRPC6/TWIST1/VCAM1/VEGFC/STC2/ADIPOQ/ARNT2/RAMP2/POSTN/FMN2/CPEB1/NDNF	32
BP	GO:0030324	lung development	31/1133	172/18670	4.32464e-08	3.7284e-06	2.80598e-06	ARG1/ASCL1/BMP4/CHI3L1/CRH/CCN2/EGFR/EPAS1/FGF9/GLI2/FOXA1/HOXA5/TNC/IGFBP5/MME/NFIB/PDGFRA/PGR/PHEX/PTN/SOX9/THRB/WNT5A/WNT7B/ADAMTS2/YAP1/PDPN/ZFPM2/PKDCC/CCBE1/RSPO2	31
BP	GO:0030323	respiratory tube development	31/1133	176/18670	7.47644e-08	6.14353e-06	4.62359e-06	ARG1/ASCL1/BMP4/CHI3L1/CRH/CCN2/EGFR/EPAS1/FGF9/GLI2/FOXA1/HOXA5/TNC/IGFBP5/MME/NFIB/PDGFRA/PGR/PHEX/PTN/SOX9/THRB/WNT5A/WNT7B/ADAMTS2/YAP1/PDPN/ZFPM2/PKDCC/CCBE1/RSPO2	31
BP	GO:0021953	central nervous system neuron differentiation	31/1133	183/18670	1.86149e-07	1.37881e-05	1.03769e-05	ASCL1/CDH11/DCC/DLX5/EPHA4/EPHB1/ERBB4/GLI2/ID4/MAP2/NFIB/NPY/NTRK2/PTK2/ROBO1/ROBO2/RORA/SFRP1/SFRP2/SOX1/SPOCK1/TAL1/WNT5A/DCLK1/SLIT2/OLIG2/DKK1/TSKU/SALL3/BCL11B/HES5	31
BP	GO:0097191	extrinsic apoptotic signaling pathway	31/1133	224/18670	1.48807e-05	0.000399273	0.000300491	FASLG/BMP4/BMP5/CAV1/COL2A1/DCC/CTTN/EYA4/EYA2/GDNF/IFI27/IFNG/IL2/IL7/LCN2/LMNA/MAL/SORT1/CX3CL1/SFRP1/SFRP2/SNAI2/PRDX2/TIMP3/SRPX/BCL2L10/YAP1/PAK5/IL33/ZSWIM2/DAB2IP	31
BP	GO:0007611	learning or memory	31/1133	256/18670	0.000191142	0.00275401	0.00207265	APOE/ADGRB3/CAMK4/CNR1/CRH/EGFR/FGF13/AFF2/GHSR/HTR2A/MME/NFATC4/NTRK2/PRKN/LGMN/RELN/PTN/SLC6A1/SNAP25/ITGA8/KALRN/NRXN3/C1QL1/NLGN4Y/SHANK2/DKK1/SORCS3/CNTNAP2/PAK5/NLGN4X/SHISA7	31
BP	GO:0007548	sex differentiation	31/1133	270/18670	0.000487556	0.00563529	0.00424109	BMP5/FGF9/FOXF2/FOXC1/GJA1/HOXA9/HOXA10/HOXA11/INHBB/MMP19/ROR2/PBX1/PDGFRA/PGR/ROBO2/SDC1/SFRP1/SFRP2/SLIT3/SOX9/TBX3/WNT5A/FZD4/UTF1/SLIT2/PCYT1B/SYCP2/ZFPM2/SIX4/LGR4/CCDC182	31
BP	GO:0043542	endothelial cell migration	31/1133	273/18670	0.000588551	0.00648887	0.00488349	ANXA3/APOE/CEACAM1/BMP4/DCN/EPHA2/FAP/GDF2/KDR/MET/PDGFB/PRKD1/LGMN/PTK2/PTN/ROBO1/STC1/NR2F2/VEGFC/WNT5A/SLIT2/BCAR1/SASH1/ADAMTS9/RHOJ/SMOC2/MMRN2/CCBE1/DAB2IP/CLEC14A/BMPER	31
BP	GO:0021700	developmental maturation	31/1133	284/18670	0.00113371	0.0107041	0.00805582	ASCL1/ADGRB3/CDH5/EPAS1/EPB42/GJA1/FOXA1/HOXA5/LTF/NEFL/NFIA/NFATC4/PAEP/PGR/RELN/CX3CL1/TAL1/WNT5A/C1QL1/ARHGEF15/CNTNAP2/TFCP2L1/GAL/SYBU/FAT4/IGSF21/DAB2IP/TDRD5/BHLHA15/SLFN14/HES5	31
BP	GO:0072593	reactive oxygen species metabolic process	31/1133	284/18670	0.00113371	0.0107041	0.00805582	AGTR1/ABCD2/ASS1/CAV1/CPS1/CCN2/EGFR/EPHX2/HBA1/HBA2/HBM/HBB/HBG2/HBQ1/IFNG/IL10/MAOB/MMP8/NOS2/PRKN/PDGFB/PON3/PTGIS/RORA/PRDX2/NOS1AP/PRG3/PLA2R1/PID1/SLC30A10/CD177	31
BP	GO:0042063	gliogenesis	31/1133	290/18670	0.00158609	0.0138971	0.0104589	ASCL1/EGFR/EPHA4/ID4/IFNG/NFIB/NTRK2/NTRK3/ROR1/ROR2/PLAG1/RELN/PTN/CX3CL1/SOX9/TAL1/OLIG2/WASF3/ZNF365/SYNE2/DAAM2/TENM4/TMEM98/SOX6/ADGRG6/FA2H/SH3TC2/IL33/IL34/DAB2IP/HES5	31
BP	GO:1903037	regulation of leukocyte cell-cell adhesion	31/1133	304/18670	0.00328515	0.0237316	0.0178603	ARG1/ASS1/CEACAM1/BMP4/CAV1/CD6/CD28/CD40LG/CTLA4/LRRC32/GLI2/IFNG/IGF2/IL2/IL7/IL7R/IL10/LCK/LGALS1/XCL1/CXCL12/SPTA1/PRDX2/THY1/VCAM1/EBI3/VSIG4/ICOS/SIRPG/IL23R/TARM1	31
BP	GO:0050863	regulation of T cell activation	31/1133	314/18670	0.00528814	0.0347195	0.0261297	ARG1/CEACAM1/BMP4/CAMK4/CAV1/CD6/CD28/CD40LG/CTLA4/LRRC32/GLI2/IFNG/IGF2/IL2/IL7/IL7R/IL10/LCK/LGALS1/XCL1/SPTA1/PRDX2/THY1/VCAM1/EBI3/VSIG4/ICOS/SIRPG/CYP26B1/IL23R/TARM1	31
BP	GO:0007568	aging	31/1133	321/18670	0.00723147	0.0438574	0.0330069	APOD/ARG1/ASS1/CNR1/COL4A2/CCN2/DCN/GJB2/GNAO1/HTR2A/IGFBP5/IL10/LMNA/MME/MMP7/PCK1/PRELP/CX3CL1/TBX2/TBX3/TRPC6/TWIST1/VCAM1/HMGA2/KL/NUAK1/GJB6/PLA2R1/DKK1/TFCP2L1/SLC30A10	31
CC	GO:0098936	intrinsic component of postsynaptic membrane	31/1188	122/19717	4.48374e-12	4.40303e-10	3.37932e-10	ADRA2C/CDH9/CDH10/CHRM3/DCC/EPHA4/EPHA7/ERBB4/GABRB2/GABRD/GRID1/GRIK4/HTR2A/HTR3A/KCNA3/NTRK3/PCDH8/PTPRS/SLC6A1/SLC6A9/PLPPR4/NLGN1/SORCS3/FLRT3/CACNG4/PCDH17/LRFN2/LRRC4C/LRRTM3/RGS7BP/SHISA7	31
CC	GO:0150034	distal axon	31/1188	285/19717	0.00107601	0.00756927	0.00580941	ADRA2C/CDH8/CHRM3/CNR1/DLG3/DPYSL3/CTTN/EPHA4/FGF13/GAD1/HTR1B/KCNA2/KCNA3/MAP2/NEFL/NTRK2/ROR1/SNAP25/THY1/UNC5C/TSPOAP1/OLFM1/CPLX1/NMU/STMN2/SHANK2/COBL/FLRT3/PACSIN1/TENM2/STMN4	31
MF	GO:0008237	metallopeptidase activity	30/1117	181/17697	1.06787e-06	4.70987e-05	3.82777e-05	CLCA1/ENPEP/FAP/KEL/MME/MMP7/MMP8/MMP9/MMP13/MMP19/PAPPA/PHEX/TLL1/TLL2/ADAM19/ADAM23/ADAMTS4/ADAMTS2/ADAM29/TRHDE/ADAMTS9/MMP27/ADAMTS20/ADAM33/CPXM2/TRABD2A/ADAMTS17/ADAMTS18/ADAM32/TRABD2B	30
BP	GO:0048706	embryonic skeletal system development	30/1133	126/18670	6.81402e-11	2.23968e-08	1.68557e-08	NKX3-2/BMP4/COL1A1/COL2A1/COL11A1/FGF9/HOXA3/HOXA4/HOXA5/HOXA7/HOXA9/HOXA11/HOXB2/HOXB3/HOXB4/HOXB5/HOXB6/HOXB7/HOXB8/HOXC6/PBX1/PDGFRA/PRRX1/SIX1/TWIST1/WNT5A/SIX2/SULF1/SIX4/OSR2	30
BP	GO:0045216	cell-cell junction organization	30/1133	156/18670	1.53805e-08	1.70154e-06	1.28057e-06	ANK2/CAV1/CDH1/CDH5/CDH6/CDH8/CDH9/CDH10/CDH11/CDH15/DSP/EPHA2/GJA1/GJA5/GJB2/SNAI2/TJP1/UGT8/PATJ/RAMP2/EPB41L3/GRHL1/CD177/NLGN4X/PERP/CDH22/POF1B/FRMPD2/SDK1/OCLN	30
BP	GO:0035637	multicellular organismal signaling	30/1133	204/18670	6.03685e-06	0.000203512	0.000153162	ANK2/ATP1A4/ATP1B2/CACNA2D1/CAV1/DSP/FGF12/GHSR/GJA1/GJA5/KCNA2/KCNA5/KCNH2/KCNJ3/KCNJ11/KCNK1/NPR1/NTRK2/NTRK3/RYR2/SCN3A/TRPC1/CACNA1I/ABCC9/TRDN/CNTNAP2/CACNG4/CTNNA3/KCNK15/KCNE1B	30
BP	GO:0002064	epithelial cell development	30/1133	207/18670	8.12105e-06	0.000252714	0.000190191	NKX3-2/BMP4/BMP5/CDH5/EPHA2/FAT1/GJA1/GPR4/FOXA1/HOXA5/MET/PDGFB/PGR/PTPRS/ROS1/SDC1/SOX9/STC1/TJP1/CLRN1/WNT5A/WNT7B/ADIPOQ/EXPH5/TFCP2L1/BCL11B/POF1B/COL18A1/FRMD6/VSIG1	30
BP	GO:0006813	potassium ion transport	30/1133	240/18670	0.000137137	0.00214644	0.0016154	ANK2/ATP1A4/ATP1B2/CAV1/EDN3/GJA5/HTR2A/KCNA2/KCNA3/KCNA5/KCNH2/KCNJ3/KCNJ11/KCNJ15/KCNK1/KCNN3/KCNQ3/KEL/SLC12A3/SNAP25/ABCC8/NOS1AP/ABCC9/NEDD4L/GAL/KCNK15/WNK2/LRRC38/KCNT2/KCNE1B	30
BP	GO:0030072	peptide hormone secretion	30/1133	250/18670	0.000281881	0.00378811	0.00285091	ADRA2C/CACNA1E/CNR1/CRH/EDN3/EGFR/GHSR/GJA1/FFAR3/IFNG/INHBB/KCNA5/KCNJ11/MC4R/NOS2/PRKN/SFRP1/SNAP25/ABCC8/KALRN/STXBP5L/CPLX1/NMU/PCLO/GAL/ANO1/SYBU/G6PC2/ACVR1C/SLC30A8	30
BP	GO:0022409	positive regulation of cell-cell adhesion	30/1133	255/18670	0.000395966	0.0049305	0.00371066	CAV1/CD6/CD28/CD40LG/CTLA4/DMTN/GLI2/FOXA1/IFNG/IGF2/IL2/IL7/IL7R/IL10/LCK/LGALS1/MYO10/XCL1/CX3CL1/SPTA1/THY1/VCAM1/WNT5A/PLPP3/ADAM19/EBI3/PDPN/ICOS/SIRPG/IL23R	30
BP	GO:0046883	regulation of hormone secretion	30/1133	266/18670	0.000799943	0.00818463	0.00615971	ADRA2C/AGTR1/CACNA1E/CNR1/CRH/EDN3/EGFR/GHSR/GJA1/FFAR3/IFNG/INHBB/KCNA5/KCNJ11/NOS2/PRKN/SFRP1/SNAP25/ABCC8/KALRN/ADIPOQ/STXBP5L/NMU/GAL/ANO1/SYBU/G6PC2/C1QTNF1/ACVR1C/SLC30A8	30
BP	GO:0006836	neurotransmitter transport	30/1133	269/18670	0.000959365	0.00939534	0.00707088	CHAT/CNR1/CRH/GABRA2/GAD1/GDNF/HBB/HTR1B/HTR2A/MAOB/PRKN/RAB3B/SLC1A1/SLC1A7/SLC6A1/SLC6A2/SLC6A8/SLC6A9/SLC22A3/SNAP25/SYN3/PPFIA2/TSPOAP1/STXBP5L/CPLX1/NLGN1/RPH3A/PCLO/CADPS2/SLC6A19	30
CC	GO:0099055	integral component of postsynaptic membrane	30/1188	117/19717	7.71765e-12	6.31561e-10	4.84723e-10	ADRA2C/CDH9/CDH10/CHRM3/DCC/EPHA4/EPHA7/ERBB4/GABRB2/GABRD/GRID1/GRIK4/HTR2A/HTR3A/KCNA3/NTRK3/PCDH8/PTPRS/SLC6A1/SLC6A9/PLPPR4/NLGN1/SORCS3/FLRT3/CACNG4/PCDH17/LRFN2/LRRC4C/LRRTM3/SHISA7	30
CC	GO:0031983	vesicle lumen	30/1188	339/19717	0.0228029	0.0965194	0.0740785	A2M/APOB/APOE/FASLG/ARG1/CHI3L1/CHIT1/DEFA3/EGFR/F5/HBA1/HBA2/HBB/IGF2/ISLR/LCN2/LTF/MMP8/ORM1/PDGFB/PROS1/PRSS2/TF/TIMP3/VEGFC/PGLYRP1/PRG3/OLFM4/PADI2/QPCT	30
BP	GO:0034332	adherens junction organization	29/1133	142/18670	6.43957e-09	9.15289e-07	6.88841e-07	APOD/CDH1/CDH5/CDH6/CDH8/CDH9/CDH10/CDH11/CDH15/COL16A1/DSP/CTTN/DMTN/EPHA3/KDR/PTK2/PTPRK/S100A10/SFRP1/THY1/RAMP2/CORO2B/LIMCH1/RHOD/CADM3/CDH22/NECTIN4/PHLDB2/CADM2	29
BP	GO:0035107	appendage morphogenesis	29/1133	148/18670	1.71866e-08	1.78296e-06	1.34185e-06	BMP4/COL2A1/DLX5/FGF9/GJA1/GJA5/GLI2/HOXA9/HOXA10/HOXA11/ROR2/PBX1/PRRX1/SFRP2/SOX9/TBX2/TBX3/TWIST1/WNT5A/SEMA3C/DKK1/SALL3/CYP26B1/SALL4/FRAS1/PKDCC/OSR2/RSPO2/FREM2	29
BP	GO:0035108	limb morphogenesis	29/1133	148/18670	1.71866e-08	1.78296e-06	1.34185e-06	BMP4/COL2A1/DLX5/FGF9/GJA1/GJA5/GLI2/HOXA9/HOXA10/HOXA11/ROR2/PBX1/PRRX1/SFRP2/SOX9/TBX2/TBX3/TWIST1/WNT5A/SEMA3C/DKK1/SALL3/CYP26B1/SALL4/FRAS1/PKDCC/OSR2/RSPO2/FREM2	29
BP	GO:0048754	branching morphogenesis of an epithelial tube	29/1133	150/18670	2.35243e-08	2.24935e-06	1.69285e-06	BMP4/COL4A1/EDNRA/EPHA2/GDF2/GDNF/GLI2/FOXA1/HOXA5/HOXA11/HOXB7/TNC/MET/NFATC4/PBX1/PGR/SFRP2/SIX1/SOX9/TBX3/WNT5A/SLIT2/YAP1/SIX2/SIX4/RASIP1/LGR4/FAT4/RSPO2	29
BP	GO:1903034	regulation of response to wounding	29/1133	179/18670	1.18881e-06	5.74572e-05	4.3242e-05	APOE/CEACAM1/CAV1/DMTN/EPHA4/F11/FAP/GJA1/IL10/KLKB1/KRT1/NTRK3/PDGFB/PDGFRA/PRKG1/PROS1/PTN/PTPRS/PRDX2/TSPAN8/PLPP3/CCN4/PDPN/AJAP1/SMOC2/EPPK1/PHLDB2/C1QTNF1/ADAMTS18	29
BP	GO:0030278	regulation of ossification	29/1133	203/18670	1.51165e-05	0.0004031	0.000303371	BMP4/GJA1/ID3/IGFBP5/LTF/MGP/DDR2/PBX1/ENPP1/PRKD1/PTK2/PTN/RORB/SFRP1/SFRP2/SNAI2/SOX9/TWIST1/WNT5A/WNT7B/CHRD/CCN4/KL/SIX2/DKK1/SMOC1/PKDCC/OSR2/TMEM119	29
BP	GO:0044706	multi-multicellular organism process	29/1133	222/18670	8.05788e-05	0.00144304	0.00108603	ADRA2C/ARG1/CNR1/COL16A1/CRH/EPOR/FBLN1/GHSR/GJA1/GJB2/IGFBP5/MMP7/MMP9/PAPPA/PGR/PTGIS/PTN/PZP/STC1/TAC3/NR2F2/STC2/KALRN/RAMP2/KLF1/TFCP2L1/CLIC5/TLE6/ACVR1C	29
BP	GO:0010594	regulation of endothelial cell migration	29/1133	229/18670	0.000140116	0.00217366	0.00163589	ANXA3/APOE/CEACAM1/BMP4/DCN/EPHA2/GDF2/KDR/MET/PDGFB/PRKD1/LGMN/PTK2/PTN/STC1/NR2F2/VEGFC/WNT5A/PLPP3/SLIT2/BCAR1/SASH1/ADAMTS9/RHOJ/SMOC2/MMRN2/CCBE1/DAB2IP/BMPER	29
BP	GO:0016358	dendrite development	29/1133	233/18670	0.00018957	0.00273887	0.00206126	APOE/ADGRB3/BMP5/DCC/EPHA4/EPHB1/IL2/MAP2/MARK1/NFATC4/PRKG1/RELN/PTN/PTPRD/PTPRS/SDC2/TRPC6/KALRN/DCLK1/NLGN1/ZNF365/SHANK2/COBL/NEDD4L/SLITRK5/PACSIN1/PREX2/DAB2IP/SDK1	29
BP	GO:0033002	muscle cell proliferation	29/1133	239/18670	0.000293034	0.00391133	0.00294365	APOD/BMP4/EGFR/EPHB1/ERBB4/FGF9/FOXC1/GJA1/HTR1B/IFNG/IGFBP3/IGFBP5/IL10/MMP9/NPR1/PDE1A/PDGFB/PRKG1/CX3CL1/SIX1/TBX2/TGFBR3/CCN4/ADIPOQ/YAP1/ZFPM2/HEY2/TENM4/HES5	29
BP	GO:0045926	negative regulation of growth	29/1133	249/18670	0.000578981	0.00642411	0.00483475	ADRB1/BMP4/DCC/EPHA7/ESR2/FGF13/FRZB/GDF2/GJA1/IGFBP5/MAP2/NPR1/ENPP1/LGMN/PTK2/PTPRS/SFRP1/SFRP2/SLIT3/TLL2/WNT5A/STC2/SLIT2/SEMA3C/GAL/SEMA5B/TMPRSS4/SOX17/SEMA6D	29
BP	GO:1990778	protein localization to cell periphery	29/1133	311/18670	0.0143564	0.0748268	0.0563142	ANK1/ANK2/CAV1/CDH1/EGFR/EPHA2/EPHA3/FGF13/GHSR/IFNG/KCNJ11/MAL/PRKG2/RAB3B/S100A10/SLC4A1/SNAP25/STAC/TUB/ADIPOQ/GPC6/RAMP2/CPLX1/EPB41L3/PACSIN1/PID1/PKDCC/LRRC15/FYB2	29
BP	GO:0099173	postsynapse organization	28/1133	163/18670	5.37632e-07	3.07413e-05	2.31358e-05	APOE/DGKB/DLG3/CTTN/EPHA4/EPHA7/EPHB1/GDNF/GHSR/NEFL/NTRK3/LGMN/RELN/PTN/PTPRD/PTPRS/WNT5A/KALRN/NOS1AP/NLGN4Y/NLGN1/ZNF365/SHANK2/LRFN2/NLGN4X/TMEM108/ARHGAP39/SHISA7	28
BP	GO:0007369	gastrulation	28/1133	185/18670	7.00226e-06	0.000233069	0.000175406	APLNR/BMP4/COL4A2/COL5A1/COL8A1/COL11A1/COL12A1/EPHA2/EYA2/FOXC1/HOXA11/IL10/MMP8/MMP9/SFRP1/SFRP2/TAL1/WNT5A/HMGA2/ITGA8/CHRD/ADIPOQ/SIX2/DKK1/TENM4/SOX17/WLS/PHLDB2	28
BP	GO:0007565	female pregnancy	28/1133	192/18670	1.42936e-05	0.000387475	0.000291612	ADRA2C/ARG1/CNR1/COL16A1/CRH/EPOR/FBLN1/GHSR/GJA1/GJB2/IGFBP5/MMP7/MMP9/PAPPA/PGR/PTGIS/PTN/PZP/STC1/TAC3/NR2F2/STC2/RAMP2/KLF1/TFCP2L1/CLIC5/TLE6/ACVR1C	28
BP	GO:0030178	negative regulation of Wnt signaling pathway	28/1133	210/18670	7.40453e-05	0.00136915	0.00103041	APOE/CAV1/FGF9/FRZB/IGFBP4/MLLT3/NFATC4/ROR2/PRKN/SFRP1/SFRP2/SNAI2/SOX9/WNT5A/TBX18/WIF1/DKK1/SOSTDC1/WWTR1/TSKU/SOX17/NXN/TLE6/CXXC4/TRABD2A/DAB2IP/SHISA2/TRABD2B	28
BP	GO:0071804	cellular potassium ion transport	28/1133	217/18670	0.00013144	0.00208205	0.00156694	ANK2/ATP1A4/ATP1B2/CAV1/EDN3/KCNA2/KCNA3/KCNA5/KCNH2/KCNJ3/KCNJ11/KCNJ15/KCNK1/KCNN3/KCNQ3/KEL/SLC12A3/SNAP25/ABCC8/NOS1AP/ABCC9/NEDD4L/GAL/KCNK15/WNK2/LRRC38/KCNT2/KCNE1B	28
BP	GO:0071805	potassium ion transmembrane transport	28/1133	217/18670	0.00013144	0.00208205	0.00156694	ANK2/ATP1A4/ATP1B2/CAV1/EDN3/KCNA2/KCNA3/KCNA5/KCNH2/KCNJ3/KCNJ11/KCNJ15/KCNK1/KCNN3/KCNQ3/KEL/SLC12A3/SNAP25/ABCC8/NOS1AP/ABCC9/NEDD4L/GAL/KCNK15/WNK2/LRRC38/KCNT2/KCNE1B	28
BP	GO:1904018	positive regulation of vasculature development	28/1133	230/18670	0.000350222	0.00446626	0.00336128	AGTR1/APLNR/ANXA3/CEACAM1/C3AR1/CDH5/CHI3L1/FLT1/GDF2/GHSR/IL10/KDR/PDGFB/PRKD1/PTGIS/CX3CL1/SFRP2/TWIST1/VEGFC/WNT5A/HMGA2/RAMP2/SASH1/TMEM100/RHOJ/SMOC2/CCBE1/BMPER	28
BP	GO:0048738	cardiac muscle tissue development	28/1133	233/18670	0.000432702	0.00524327	0.00394606	BMP4/BMP5/COL11A1/DSP/ERBB4/FGF9/FOXC1/GJA1/GJA5/LMNA/MYBPC2/MYH6/PDGFRA/RYR2/SGCD/TBX2/TBX3/TGFBR3/WNT5A/YAP1/DKK1/ZFPM2/HEY2/TENM4/SOX6/ADAMTS9/MYO18B/CCM2L	28
BP	GO:0048872	homeostasis of number of cells	28/1133	246/18670	0.00102089	0.00983305	0.0074003	ALAS2/BMP4/EPAS1/EPB42/DMTN/HOXA5/HOXB6/IL2/IL7/IL7R/MB/RHAG/SLC4A1/SOX9/SPTA1/TAL1/PRDX2/TGFBR3/TRIM10/KLF1/TNFRSF13B/GCNT4/AHSP/LGR4/SOX6/MPIG6B/NKX2-3/ADGRF5	28
BP	GO:0048511	rhythmic process	28/1133	295/18670	0.0128208	0.0697255	0.0524751	ASS1/CRH/EGFR/ID3/ID4/KCNA2/MMP7/MMP19/NGFR/NOS2/NTRK2/NTRK3/PDGFRA/PGR/PRKAA2/PTN/ROBO2/RORA/RORB/SLIT3/TWIST1/FZD4/SLIT2/ADIPOQ/NMU/NLGN1/MAGEL2/LGR4	28
BP	GO:0001818	negative regulation of cytokine production	28/1133	296/18670	0.0133695	0.0715264	0.0538304	ABCD2/APOD/ARG1/CEACAM1/EPHA2/LRRC32/GHSR/IFNG/IL10/INHBB/LBP/LTF/MMP8/ORM1/PTPRS/XCL1/CX3CL1/TWIST1/PGLYRP1/ADIPOQ/VSIG4/LILRA4/TRIB2/LGR4/PGLYRP4/NAV3/IL33/IL23R	28
BP	GO:0070661	leukocyte proliferation	28/1133	298/18670	0.0145238	0.0754748	0.0568019	ARG1/BMP4/CD6/CD28/CD40LG/CR2/CTLA4/LRRC32/GJA1/IGF2/IL2/IL5RA/IL7/IL7R/IL10/CCL8/XCL1/CX3CL1/SPTA1/PRDX2/VCAM1/EBI3/VSIG4/TNFRSF13B/GAL/IL33/IL34/IL23R	28
CC	GO:0019898	extrinsic component of membrane	28/1188	295/19717	0.0117709	0.0561119	0.0430659	CDH1/CDH5/CDH6/CDH8/CDH9/CDH10/CDH11/CDH15/GFRA1/GFRA3/GNAO1/GNG11/LCK/MAL/S100A10/SNAP25/STAC/TF/RGS6/RPH3A/GNG12/DUSP21/MMP27/CDH22/SYT6/JAKMIP1/HID1/MYZAP	28
KEGG	hsa04360	Axon guidance	28/528	181/8076	1.5584e-05	0.000894522	0.00081365	DCC/EPHA2/EPHA3/EPHA4/EPHA7/EPHB1/MET/NEO1/NFATC4/PPP3R2/PTK2/ROBO1/ROBO2/CXCL12/SLIT3/TRPC1/TRPC3/TRPC6/WNT5A/UNC5C/SLIT2/SEMA3C/RHOD/SEMA5B/ENAH/PAK5/LRRC4C/SEMA6D	28
MF	GO:0016791	phosphatase activity	27/1117	270/17697	0.0121539	0.0844499	0.0686335	ALPL/CA3/EPHX2/EYA4/EYA2/LCK/MYH6/PON3/PPP1R3C/PPP2R2B/PTPRB/PTPRD/PTPRG/PTPRK/PTPRS/CDC14B/PLPP3/PLPPR4/DUSP13/UBASH3A/G6PC2/DUSP21/LPIN3/DUSP26/PLPP4/PPM1J/PTPRQ	27
BP	GO:0022612	gland morphogenesis	27/1133	120/18670	2.32244e-09	3.93991e-07	2.96516e-07	ARG1/CEACAM1/BMP4/CAV1/EDA/EGFR/EPHA2/GLI2/FOXA1/TNC/ID4/IGFBP5/NFIB/PGR/PLAG1/PTN/SFRP1/SNAI2/SOX9/TBX2/TBX3/WNT5A/SEMA3C/NRG3/SULF1/SOSTDC1/NKX2-3	27
BP	GO:0055123	digestive system development	27/1133	146/18670	1.84427e-07	1.37881e-05	1.03769e-05	ASCL1/ASS1/NKX3-2/BMP4/COL3A1/CPS1/EGFR/FGF9/FOXF2/FOXL1/GLI2/HOXA5/IGF2/NPY/PDGFRA/SFRP1/SFRP2/TBX2/WNT5A/SIX2/COBL/LGR4/SOX17/FAT4/WLS/PKDCC/NKX2-3	27
BP	GO:0001764	neuron migration	27/1133	157/18670	8.33706e-07	4.47394e-05	3.36706e-05	ASCL1/ASTN1/COL3A1/DCC/ERBB4/FGF13/GFRA3/GJA1/MARK1/NTRK2/NTRK3/PRKG1/RELN/PTK2/CX3CL1/CXCL12/SOX1/SPOCK1/NR2F2/TWIST1/DCLK1/NRG3/CHL1/FLRT2/NDNF/DAB2IP/NEXMIF	27
BP	GO:0031960	response to corticosteroid	27/1133	162/18670	1.5682e-06	7.10965e-05	5.35068e-05	ALPL/ANXA3/ARG1/ASS1/CDO1/COL1A1/CPS1/CRH/CCN2/EGFR/GHSR/GJB2/HTR1B/IL10/MAOB/NEFL/NTRK3/PAPPA/PCK1/SDC1/SLIT3/STC1/WNT7B/SLIT2/ADIPOQ/IL22/TRIM63	27
BP	GO:0050954	sensory perception of mechanical stimulus	27/1133	165/18670	2.25743e-06	9.27487e-05	6.98021e-05	ASIC2/COL1A1/COL2A1/COL11A1/CRYM/EYA4/GABRB2/GABRB3/GJB2/HTR2A/MYO6/ROR1/CXCL12/SIX1/SNAI2/THRB/TUB/CLRN1/FZD4/TRPA1/GJB6/CLIC5/CNTN5/TMPRSS3/ESPN/NAV2/CCDC50	27
BP	GO:0031345	negative regulation of cell projection organization	27/1133	188/18670	2.66996e-05	0.00062153	0.00046776	APOE/DCC/DPYSL3/EPHA4/EPHA7/FGF13/LGALS1/MAP2/NFATC4/NGFR/PTK2/PTPRG/PTPRS/RAP1GAP/SPOCK1/NR2F1/THY1/TRPC6/WNT5A/SLIT2/SEMA3C/STMN2/NLGN1/ZNF365/DKK1/SEMA5B/SEMA6D	27
BP	GO:0007626	locomotory behavior	27/1133	198/18670	6.7029e-05	0.00125895	0.000947478	APOE/ASTN1/CRH/EPHA4/FGF12/GAD1/GDNF/GHSR/GNAO1/GPR37/HOXB8/NOVA1/PRKN/PBX3/CXCL12/SNAP25/TAL1/UCHL1/FZD4/KALRN/CHL1/C1QL1/MCOLN3/PAK5/PREX2/ESPN/NAV2	27
BP	GO:0035265	organ growth	27/1133	204/18670	0.000112067	0.00179683	0.00135228	COL6A3/COL12A1/ERBB4/FGF9/FOXC1/GJA1/IL7/MATN3/MMP13/MYH6/DDR2/VIT/PLAG1/PTK2/SOX9/STC1/TBX2/TGFBR3/YAP1/ZFPM2/HEY2/TENM4/NLGN4X/COL21A1/CCM2L/RSPO2/VWA2	27
BP	GO:0007584	response to nutrient	27/1133	219/18670	0.000361959	0.00457582	0.00344374	ALPL/ARG1/ASCL1/ASS1/C2/CNR1/COL1A1/EGFR/TNC/KCNJ11/PHEX/PKLR/PTN/SFRP1/SFRP2/SNAI2/STC1/TRPC3/TSHB/VCAM1/STC2/LRAT/ADIPOQ/LIPG/POSTN/CYP26B1/SLC6A19	27
BP	GO:0042445	hormone metabolic process	27/1133	232/18670	0.000890568	0.00895506	0.00673953	ACHE/ADH1C/ALDH1A1/BMP5/CHAT/CRH/CRYM/CYP2C18/CYP11A1/ENPEP/GHR/FFAR3/FOXA1/IFNG/MME/PDGFRA/PON3/TSHB/STC2/LRAT/TSPOAP1/CYP46A1/PCSK1N/GAL/GCNT4/CYP26B1/SELENOM	27
CC	GO:0005581	collagen trimer	27/1188	87/19717	6.03518e-13	7.40818e-11	5.68577e-11	COL1A1/COL1A2/COL2A1/COL3A1/COL4A1/COL4A2/COL5A1/COL6A3/COL8A1/COL9A2/COL11A1/COL12A1/COL15A1/COL16A1/COL19A1/DCN/EDA/LUM/ADIPOQ/C1QL1/COL5A3/COL18A1/COL21A1/C1QTNF1/CCBE1/COL22A1/SFTPA1	27
CC	GO:0042734	presynaptic membrane	27/1188	161/19717	1.21738e-06	2.29898e-05	1.76447e-05	CDH9/CDH10/CHRM3/CNR1/EPHA4/ERBB4/GRIK4/GRM8/HTR1B/HTR2A/HTR3A/KCNA2/KCNA3/KCNJ3/PCDH8/PTPRS/SLC6A1/SLC6A2/SLC6A9/SNAP25/ADAM23/PCDH17/CNTN5/CADM3/IGSF21/CADPS2/RGS7BP	27
CC	GO:0016323	basolateral plasma membrane	27/1188	217/19717	0.000280293	0.00264662	0.00203128	ANK1/ANK2/CEACAM1/CHRM3/DLG3/DSP/EGFR/ERBB4/MET/MYO1D/PDGFB/ENPP1/SLC4A1/TF/TJP1/SLC4A4/HEPH/PDPN/SLC22A7/RHCG/AJAP1/EPPK1/SLC51B/FRMPD2/CD300LG/GPIHBP1/VSIG1	27
MF	GO:0004222	metalloendopeptidase activity	26/1117	103/17697	7.35595e-10	6.16429e-08	5.00979e-08	FAP/KEL/MME/MMP7/MMP8/MMP9/MMP13/MMP19/PAPPA/PHEX/TLL1/TLL2/ADAM19/ADAM23/ADAMTS4/ADAMTS2/ADAM29/ADAMTS9/MMP27/ADAMTS20/ADAM33/TRABD2A/ADAMTS17/ADAMTS18/ADAM32/TRABD2B	26
BP	GO:0002062	chondrocyte differentiation	26/1133	123/18670	1.83305e-08	1.85385e-06	1.3952e-06	NKX3-2/BMP4/COL2A1/COL6A3/COL11A1/COL12A1/CCN2/EFEMP1/FGF9/GLI2/HOXA11/MATN3/NFIB/VIT/SFRP2/SNAI2/SOX9/HMGA2/CCN4/SIX2/SULF1/SOX6/COL21A1/PKDCC/OSR2/VWA2	26
BP	GO:0035296	regulation of tube diameter	26/1133	143/18670	4.37263e-07	2.61377e-05	1.96711e-05	ASIC2/ADRA2C/ADRB1/AGTR1/APOE/CAV1/CHRM3/CPS1/EDN3/EDNRA/EGFR/EPHX2/FOXC1/GJA1/GJA5/UTS2R/HBB/HTR1B/HTR2A/KCNA5/KEL/NPR1/PRKG1/UTS2/ARHGAP42/UTS2B	26
BP	GO:0050880	regulation of blood vessel size	26/1133	143/18670	4.37263e-07	2.61377e-05	1.96711e-05	ASIC2/ADRA2C/ADRB1/AGTR1/APOE/CAV1/CHRM3/CPS1/EDN3/EDNRA/EGFR/EPHX2/FOXC1/GJA1/GJA5/UTS2R/HBB/HTR1B/HTR2A/KCNA5/KEL/NPR1/PRKG1/UTS2/ARHGAP42/UTS2B	26
BP	GO:0097746	regulation of blood vessel diameter	26/1133	143/18670	4.37263e-07	2.61377e-05	1.96711e-05	ASIC2/ADRA2C/ADRB1/AGTR1/APOE/CAV1/CHRM3/CPS1/EDN3/EDNRA/EGFR/EPHX2/FOXC1/GJA1/GJA5/UTS2R/HBB/HTR1B/HTR2A/KCNA5/KEL/NPR1/PRKG1/UTS2/ARHGAP42/UTS2B	26
BP	GO:0035150	regulation of tube size	26/1133	144/18670	5.03306e-07	2.94098e-05	2.21337e-05	ASIC2/ADRA2C/ADRB1/AGTR1/APOE/CAV1/CHRM3/CPS1/EDN3/EDNRA/EGFR/EPHX2/FOXC1/GJA1/GJA5/UTS2R/HBB/HTR1B/HTR2A/KCNA5/KEL/NPR1/PRKG1/UTS2/ARHGAP42/UTS2B	26
BP	GO:0048592	eye morphogenesis	26/1133	149/18670	9.94537e-07	5.07793e-05	3.82162e-05	FASLG/BMP4/COL5A1/COL8A1/EPHA2/EPHB1/FAT1/EFEMP1/FOXF2/NTRK2/PITX2/PTN/RORB/SOX1/SOX9/TBX2/THRB/THY1/TWIST1/WNT5A/TSPAN12/FJX1/VAX2/TSKU/OLFM3/SDK1	26
BP	GO:0010977	negative regulation of neuron projection development	26/1133	155/18670	2.15056e-06	9.04785e-05	6.80936e-05	APOE/DCC/DPYSL3/EPHA4/EPHA7/FGF13/LGALS1/MAP2/NFATC4/NGFR/PTK2/PTPRG/PTPRS/SPOCK1/NR2F1/THY1/TRPC6/WNT5A/SLIT2/SEMA3C/STMN2/NLGN1/ZNF365/DKK1/SEMA5B/SEMA6D	26
BP	GO:0071772	response to BMP	26/1133	170/18670	1.21728e-05	0.00034854	0.00026231	BMP4/BMP5/CDH5/COL2A1/DLX5/GDF2/MYH6/NEO1/ROR2/HTRA1/RYR2/SFRP1/SFRP2/SOX9/TGFBR3/WNT5A/CHRD/FST/FSTL1/DKK1/SULF1/SOSTDC1/TMEM100/GREM2/BMPER/HES5	26
BP	GO:0071773	cellular response to BMP stimulus	26/1133	170/18670	1.21728e-05	0.00034854	0.00026231	BMP4/BMP5/CDH5/COL2A1/DLX5/GDF2/MYH6/NEO1/ROR2/HTRA1/RYR2/SFRP1/SFRP2/SOX9/TGFBR3/WNT5A/CHRD/FST/FSTL1/DKK1/SULF1/SOSTDC1/TMEM100/GREM2/BMPER/HES5	26
BP	GO:0003205	cardiac chamber development	26/1133	171/18670	1.35425e-05	0.000369015	0.000277719	ANK2/BMP4/BMP5/COL11A1/DSP/FOXC1/GJA5/MYH6/ROBO1/ROBO2/RYR2/SFRP2/SLIT3/TBX2/TBX3/TGFBR3/WNT5A/SLIT2/SEMA3C/ZFPM2/HEY1/HEY2/PARVA/SALL4/ADGRG6/CCM2L	26
BP	GO:2001257	regulation of cation channel activity	26/1133	178/18670	2.7771e-05	0.000643382	0.000484206	ANK2/ANXA3/CACNA2D1/CAV1/CRH/DLG3/FGF12/FGF14/GEM/GRIA3/IFNG/KCNJ11/MMP9/NEFL/RELN/STAC/NOS1AP/TRDN/NLGN1/SHANK2/CACNG4/GAL/JPH1/LRRC38/SHISA7/KCNE1B	26
BP	GO:0050770	regulation of axonogenesis	26/1133	183/18670	4.50725e-05	0.000926579	0.000697338	APOE/DCC/CTTN/EPHA4/EPHA7/FGF13/KEL/MAP2/NEFL/NGFR/NTRK2/NTRK3/PTK2/PTPRS/ROBO1/ROBO2/CXCL12/THY1/WNT5A/XK/SLIT2/OLFM1/SEMA3C/SEMA5B/LRRC4C/SEMA6D	26
BP	GO:0034764	positive regulation of transmembrane transport	26/1133	204/18670	0.000273924	0.0037128	0.00279423	APLNR/ANK2/ATP1B2/CACNA2D1/EDN3/FGF14/HTR3A/IFNG/KCNH2/KCNJ11/CXCL9/RELN/RYR2/XCL1/CX3CL1/STAC/THY1/TRPC1/TRPC6/ADIPOQ/NOS1AP/TRDN/CACNG4/GAL/WNK2/LRRC38	26
BP	GO:0050920	regulation of chemotaxis	26/1133	217/18670	0.000712865	0.00754317	0.00567695	C3AR1/EDN3/KDR/LBP/MET/NTRK3/PDGFB/PDGFRA/PRKD1/LGMN/PTN/ROBO1/ROBO2/CCL1/XCL1/CXCL12/XCL2/VEGFC/WNT5A/SLIT2/CXCL14/SEMA3C/PADI2/SEMA5B/SMOC2/SEMA6D	26
BP	GO:0010001	glial cell differentiation	26/1133	218/18670	0.000763856	0.00797048	0.00599854	ASCL1/EGFR/EPHA4/ID4/IFNG/NFIB/NTRK2/NTRK3/ROR1/ROR2/RELN/PTN/SOX9/TAL1/OLIG2/WASF3/ZNF365/DAAM2/TENM4/TMEM98/SOX6/ADGRG6/FA2H/SH3TC2/IL34/HES5	26
BP	GO:0002526	acute inflammatory response	26/1133	220/18670	0.00087545	0.00881991	0.00663781	A2M/ASS1/C1S/C2/C3AR1/C4B/C7/CD5L/CD6/CNR1/CPN2/CR1L/CR2/DNASE1L3/FFAR3/CFI/KLKB1/LBP/ORM1/PROS1/VCAM1/OSMR/CD163/VSIG4/IL22/C2CD4A	26
BP	GO:0030595	leukocyte chemotaxis	26/1133	224/18670	0.00114178	0.0107417	0.00808417	C3AR1/EDN3/FLT1/CXCR1/IL10/LBP/CXCL9/PDGFB/LGMN/PTN/CCL1/CCL8/CCL14/CCL16/CCL18/CCL23/XCL1/CX3CL1/CXCL12/XCL2/VEGFC/WNT5A/SLIT2/CXCL14/PADI2/IL36A	26
BP	GO:0048588	developmental cell growth	26/1133	234/18670	0.00213237	0.0175186	0.0131844	APOE/DCC/CTTN/EPHA7/FGF13/MAP2/NTRK3/PRKN/PTPRS/CXCL12/SLIT3/SOX9/WNT5A/DCLK1/SLIT2/OLFM1/SEMA3C/POSTN/COBL/NEDD4L/FLRT3/GAL/SEMA5B/CPNE5/TMEM108/SEMA6D	26
BP	GO:0090092	regulation of transmembrane receptor protein serine/threonine kinase signaling pathway	26/1133	241/18670	0.00320011	0.0233375	0.0175637	BMP3/BMP4/BMP5/CAV1/CDH5/FGF9/GDF2/INHBB/NEO1/HTRA1/SFRP1/SFRP2/TGFBR3/WNT5A/ITGA8/CHRD/FST/FSTL1/DKK1/SULF1/SOSTDC1/WWTR1/PRDM16/GREM2/BMPER/HES5	26
BP	GO:0071559	response to transforming growth factor beta	26/1133	255/18670	0.00671797	0.0419096	0.031541	ARG1/CAV1/CDH5/COL1A1/COL1A2/COL3A1/COL4A2/FMOD/LRRC32/LTBP2/HTRA1/PTK2/PTPRK/XCL1/SFRP1/SOX9/TGFBR3/WNT5A/ITGA8/POSTN/MXRA5/SOX6/PRDM16/FNDC4/WNT10A/ACVR1C	26
BP	GO:0050730	regulation of peptidyl-tyrosine phosphorylation	26/1133	256/18670	0.00705969	0.0431207	0.0324524	CAV1/DLG3/DOCK3/EGFR/DMTN/EPHA4/EPHA7/ERBB4/GHR/HTR2A/IFNG/IGF2/IL2/IL7/NTRK2/PDGFB/RELN/SFRP1/SFRP2/TAL1/THY1/ADIPOQ/GPRC5B/TSLP/IL23R/HES5	26
CC	GO:0005604	basement membrane	26/1188	95/19717	3.90368e-11	2.12967e-09	1.63452e-09	ACHE/COL2A1/COL4A1/COL4A2/COL5A1/COL8A1/COL9A2/COL15A1/FBLN1/FGF9/TNC/LAMA4/PTN/TIMP3/EGFL6/P3H2/SMOC1/SMOC2/MMRN2/FRAS1/COL18A1/HMCN1/EGFLAM/FREM1/VWA2/FREM2	26
KEGG	hsa04974	Protein digestion and absorption	26/528	103/8076	1.26699e-09	3.63627e-07	3.30752e-07	ATP1A4/ATP1B2/COL1A1/COL1A2/COL2A1/COL3A1/COL4A1/COL4A2/COL5A1/COL6A3/COL8A1/COL9A2/COL11A1/COL12A1/COL15A1/COL16A1/COL19A1/MME/PRSS1/PRSS2/SLC1A1/COL5A3/COL18A1/COL21A1/COL22A1/SLC6A19	26
MF	GO:0005244	voltage-gated ion channel activity	25/1117	197/17697	0.000672221	0.0102422	0.00832397	CACNA1E/CACNA2D1/CLCN4/CNR1/HTR1B/KCNA2/KCNA3/KCNA5/KCNH2/KCNJ3/KCNJ11/KCNJ15/KCNK1/KCNQ3/SCN3A/SNAP25/CACNA1I/TSPOAP1/SLC17A3/CACNG4/CLIC5/ANO1/LRRC38/KCNT2/KCNE1B	25
MF	GO:0022832	voltage-gated channel activity	25/1117	197/17697	0.000672221	0.0102422	0.00832397	CACNA1E/CACNA2D1/CLCN4/CNR1/HTR1B/KCNA2/KCNA3/KCNA5/KCNH2/KCNJ3/KCNJ11/KCNJ15/KCNK1/KCNQ3/SCN3A/SNAP25/CACNA1I/TSPOAP1/SLC17A3/CACNG4/CLIC5/ANO1/LRRC38/KCNT2/KCNE1B	25
MF	GO:0043177	organic acid binding	25/1117	205/17697	0.00119868	0.0152196	0.0123692	ALAS2/APOC1/ASS1/CPS1/GAD1/HBA1/HBA2/HBM/HBB/HBG2/HBQ1/ID3/NOS2/PCK1/PLOD2/RYR2/SLC1A1/TDO2/NR2F2/LRAT/ADIPOQ/LYVE1/P3H2/ACOXL/CYP26B1	25
BP	GO:0048565	digestive tract development	25/1133	134/18670	4.37367e-07	2.61377e-05	1.96711e-05	ASCL1/ASS1/NKX3-2/BMP4/COL3A1/CPS1/EGFR/FGF9/FOXF2/FOXL1/GLI2/HOXA5/NPY/PDGFRA/SFRP1/SFRP2/TBX2/WNT5A/SIX2/COBL/LGR4/SOX17/FAT4/PKDCC/NKX2-3	25
BP	GO:0030048	actin filament-based movement	25/1133	138/18670	7.77782e-07	4.24694e-05	3.19623e-05	ANK2/CACNA2D1/CAV1/DSP/FGF12/GJA1/GJA5/KCNA5/KCNH2/KCNJ3/MYBPC2/MYH6/MYL4/MYO6/RYR2/SGCD/STC1/NOS1AP/PDPN/SYNE2/NEDD4L/CTNNA3/PARVA/FRMD6/KCNE1B	25
BP	GO:0072073	kidney epithelium development	25/1133	140/18670	1.02728e-06	5.14521e-05	3.87226e-05	BMP4/EPHA4/EPHA7/FOXC1/GDNF/HOXA11/HOXB7/PBX1/ROBO2/SDC1/SFRP1/SIX1/SOX9/WNT7B/SLIT2/ADIPOQ/YAP1/SIX2/WWTR1/SIX4/LGR4/FAT4/IRX2/BMPER/HES5	25
BP	GO:0001890	placenta development	25/1133	152/18670	4.82467e-06	0.000170088	0.000128007	BMP5/DCN/EGFR/EPAS1/EPOR/GHSR/GJA1/GJB2/IGF2/IL10/MME/PDGFB/HTRA1/PTGIS/PTK2/PTN/STC1/NR2F2/PHLDA2/WNT7B/STC2/ADAM19/HEY1/HEY2/RSPO3	25
BP	GO:0030856	regulation of epithelial cell differentiation	25/1133	156/18670	7.74242e-06	0.000248343	0.000186902	ASCL1/CEACAM1/BMP4/CAV1/CDH5/FOXC1/FRZB/GDF2/GDNF/HOXA7/IFNG/MMP9/SOX9/SULT2B1/TBX3/ADIPOQ/YAP1/HEY2/WWTR1/GRHL1/ESRP1/TMEM100/AJAP1/FAT4/HES5	25
BP	GO:0034767	positive regulation of ion transmembrane transport	25/1133	156/18670	7.74242e-06	0.000248343	0.000186902	APLNR/ANK2/ATP1B2/CACNA2D1/EDN3/FGF14/HTR3A/IFNG/KCNH2/KCNJ11/CXCL9/RELN/RYR2/XCL1/CX3CL1/STAC/THY1/TRPC1/TRPC6/NOS1AP/TRDN/CACNG4/GAL/WNK2/LRRC38	25
BP	GO:0031214	biomineral tissue development	25/1133	163/18670	1.69207e-05	0.000436254	0.000328323	ALPL/BMP4/COL1A1/COL1A2/GJA1/IBSP/LTF/MGP/MMP13/ROR2/DDR2/ENPP1/PHEX/PTN/SOX9/TWIST1/KL/HEY1/HEY2/LGR4/PKDCC/OSR2/FAM83H/TMEM119/RSPO2	25
BP	GO:0030177	positive regulation of Wnt signaling pathway	25/1133	179/18670	8.31919e-05	0.00147048	0.00110668	CAV1/COL1A1/DLX5/EDA/EGFR/FGF9/GPC5/MLLT3/ROR2/SFRP1/SFRP2/WNT5A/CCN4/YAP1/DKK1/SULF1/DAAM2/GPRC5B/LGR4/WNK2/WLS/RSPO3/TMEM198/RSPO1/RSPO2	25
BP	GO:0050866	negative regulation of cell activation	25/1133	199/18670	0.000443086	0.00533224	0.00401301	APOE/ARG1/CEACAM1/BMP4/CNR1/CTLA4/LRRC32/IL2/IL10/PDGFB/PDGFRA/PRKG1/XCL1/CX3CL1/SFRP1/PRDX2/PGLYRP1/VSIG4/TNFRSF13B/GAL/PGLYRP4/C1QTNF1/ADAMTS18/ADGRF5/TARM1	25
BP	GO:0045766	positive regulation of angiogenesis	25/1133	204/18670	0.000642255	0.00691312	0.00520277	AGTR1/APLNR/ANXA3/C3AR1/CDH5/CHI3L1/FLT1/GDF2/GHSR/IL10/KDR/PRKD1/PTGIS/CX3CL1/SFRP2/TWIST1/VEGFC/WNT5A/HMGA2/RAMP2/SASH1/RHOJ/SMOC2/CCBE1/BMPER	25
BP	GO:0030073	insulin secretion	25/1133	207/18670	0.000796008	0.00816024	0.00614135	ADRA2C/CACNA1E/CNR1/CRH/GHSR/GJA1/IFNG/INHBB/KCNA5/KCNJ11/MC4R/NOS2/PRKN/SFRP1/SNAP25/ABCC8/STXBP5L/CPLX1/PCLO/GAL/ANO1/SYBU/G6PC2/ACVR1C/SLC30A8	25
BP	GO:0090276	regulation of peptide hormone secretion	25/1133	208/18670	0.000853923	0.00863612	0.0064995	ADRA2C/CACNA1E/CNR1/CRH/EGFR/GHSR/GJA1/FFAR3/IFNG/INHBB/KCNA5/KCNJ11/NOS2/PRKN/SFRP1/SNAP25/ABCC8/KALRN/STXBP5L/NMU/ANO1/SYBU/G6PC2/ACVR1C/SLC30A8	25
BP	GO:0070374	positive regulation of ERK1 and ERK2 cascade	25/1133	215/18670	0.00137174	0.0124379	0.00936069	APOE/BMP4/CHI3L1/CCN2/EGFR/ERBB4/FLT1/HTR2A/KDR/PDGFB/PDGFRA/CCL1/CCL8/CCL14/CCL16/CCL18/CCL23/XCL1/CX3CL1/XCL2/AKAP12/SLC30A10/IL26/BMPER/OR2AT4	25
BP	GO:0043393	regulation of protein binding	25/1133	217/18670	0.0015621	0.0138069	0.010391	ADD2/APOE/BMP4/CAV1/EPHA4/HOXA3/IL10/MAP2/MET/MMP9/NFATC4/PRKN/PDGFB/CCL23/SPTA1/TGFBR3/PHLDA2/WNT5A/ADIPOQ/SPON1/DKK1/PRMT8/GREM2/CCM2L/DAB2IP	25
BP	GO:0045444	fat cell differentiation	25/1133	223/18670	0.00227507	0.0184639	0.0138958	ADRB1/RUNX1T1/FRZB/HTR2A/ID4/INHBB/MB/ENPP1/RORA/SORT1/SFRP1/SFRP2/SNAI2/WNT5A/HMGA2/CCN4/ADIPOQ/WIF1/ZFPM2/WWTR1/TRIB2/PRDM16/CCDC3/ADGRF5/PTPRQ	25
BP	GO:0001894	tissue homeostasis	25/1133	227/18670	0.00289085	0.0219063	0.0164866	AZGP1/COL2A1/CCN2/EGFR/EPAS1/FOXC1/IL7/KRT1/LTF/MC4R/MUC4/SOX9/TF/TFF3/TUB/CLRN1/LDB2/YAP1/WWTR1/TP53INP2/CDHR1/ADGRF5/TMEM119/VSIG1/SFTPA1	25
BP	GO:0051924	regulation of calcium ion transport	25/1133	254/18670	0.0118405	0.0649993	0.0489181	APLNR/ANK2/CACNA2D1/CAV1/CRH/FGF14/GEM/GJA1/GNAO1/CXCL9/PDGFB/RYR2/XCL1/CX3CL1/CXCL12/STAC/STC1/THY1/TRPC1/TRPC3/TRPC6/STC2/NOS1AP/TRDN/JPH1	25
CC	GO:0098858	actin-based cell projection	25/1188	208/19717	0.000774256	0.00594	0.00455894	CEACAM1/CALB2/CLCA1/EPHA4/EPHB1/FAT1/FGF13/FOXA1/MAP2/MYO6/MYO10/PDGFRA/PVALB/SLC10A2/CLRN1/VCAM1/UNC5C/PDPN/NLGN1/SYNE2/ENAH/FMN2/TENM2/ESPN/ANTXR1	25
KEGG	hsa04510	Focal adhesion	25/528	201/8076	0.00136193	0.0355339	0.0323213	CAV1/COL1A1/COL1A2/COL2A1/COL4A1/COL4A2/COL6A3/COL9A2/EGFR/FLT1/TNC/IBSP/KDR/LAMA4/MET/PDGFB/PDGFRA/RELN/PTK2/TNXB/VEGFC/ITGA8/BCAR1/PARVA/PAK5	25
KEGG	hsa05205	Proteoglycans in cancer	25/528	205/8076	0.00179893	0.036878	0.0335439	ANK1/ANK2/FASLG/CAV1/COL1A1/COL1A2/DCN/EGFR/CTTN/ERBB4/IGF2/KDR/LUM/MET/MMP9/PTK2/SDC1/SDC2/TIMP3/TWIST1/WNT5A/WNT7B/FZD4/HPSE2/WNT10A	25
MF	GO:0005178	integrin binding	24/1117	132/17697	2.3763e-06	8.65801e-05	7.03647e-05	COL3A1/COL5A1/COL16A1/CCN2/EGFR/FAP/IBSP/IGF2/KDR/PTN/CX3CL1/CXCL12/SFRP2/THY1/TSPAN8/TNXB/VCAM1/ADAM23/CCN5/CCN4/ITGBL1/ESM1/EGFL6/CD177	24
MF	GO:0004713	protein tyrosine kinase activity	24/1117	134/17697	3.1286e-06	9.71026e-05	7.89164e-05	EGFR/EPHA2/EPHA3/EPHA4/EPHA7/EPHB1/ERBB4/EFEMP1/FLT1/ITK/KDR/LCK/MET/MST1R/NTRK2/NTRK3/ROR2/DDR2/PDGFRA/PDGFRL/PTK2/ROS1/PKDCC/EPHA10	24
MF	GO:0008083	growth factor activity	24/1117	163/17697	8.98307e-05	0.00203454	0.0016535	BMP3/BMP4/BMP5/CCN2/EFEMP1/FGF9/FGF12/FGF13/FGF14/GDF2/GDNF/IGF2/IL2/IL7/IL10/INHBB/PDGFB/PTN/CXCL12/VEGFC/NRG2/NRG3/DKK1/IL34	24
BP	GO:0007043	cell-cell junction assembly	24/1133	124/18670	3.66364e-07	2.43887e-05	1.83548e-05	ANK2/CAV1/CDH1/CDH5/CDH6/CDH8/CDH9/CDH10/CDH11/CDH15/EPHA2/GJA1/GJA5/GJB2/SNAI2/TJP1/UGT8/PATJ/RAMP2/EPB41L3/CDH22/POF1B/FRMPD2/OCLN	24
BP	GO:0030326	embryonic limb morphogenesis	24/1133	125/18670	4.2772e-07	2.61377e-05	1.96711e-05	BMP4/DLX5/FGF9/GJA1/GJA5/GLI2/HOXA9/HOXA10/HOXA11/ROR2/PBX1/PRRX1/SFRP2/TBX2/TBX3/TWIST1/WNT5A/DKK1/CYP26B1/SALL4/FRAS1/OSR2/RSPO2/FREM2	24
BP	GO:0035113	embryonic appendage morphogenesis	24/1133	125/18670	4.2772e-07	2.61377e-05	1.96711e-05	BMP4/DLX5/FGF9/GJA1/GJA5/GLI2/HOXA9/HOXA10/HOXA11/ROR2/PBX1/PRRX1/SFRP2/TBX2/TBX3/TWIST1/WNT5A/DKK1/CYP26B1/SALL4/FRAS1/OSR2/RSPO2/FREM2	24
BP	GO:0003206	cardiac chamber morphogenesis	24/1133	129/18670	7.8007e-07	4.24694e-05	3.19623e-05	BMP4/BMP5/COL11A1/DSP/FOXC1/GJA5/MYH6/ROBO1/ROBO2/RYR2/SFRP2/SLIT3/TBX2/TBX3/TGFBR3/WNT5A/SLIT2/SEMA3C/ZFPM2/HEY1/HEY2/PARVA/ADGRG6/CCM2L	24
BP	GO:0042476	odontogenesis	24/1133	132/18670	1.20181e-06	5.74572e-05	4.3242e-05	ALPL/BMP4/COL1A1/COL1A2/EDA/FOXC1/GLI2/GNAO1/TNC/ID3/PAX9/PDGFRA/PHEX/PITX2/HTRA1/SDC1/TWIST1/SOSTDC1/PERP/BCL11B/WNT10A/OSR2/NKX2-3/RSPO2	24
BP	GO:0007605	sensory perception of sound	24/1133	145/18670	6.63734e-06	0.00022233	0.000167324	ASIC2/COL1A1/COL2A1/COL11A1/CRYM/EYA4/GABRB2/GABRB3/GJB2/MYO6/ROR1/SIX1/SNAI2/THRB/TUB/CLRN1/FZD4/GJB6/CLIC5/CNTN5/TMPRSS3/ESPN/NAV2/CCDC50	24
BP	GO:0051384	response to glucocorticoid	24/1133	146/18670	7.49392e-06	0.000244786	0.000184224	ALPL/ANXA3/ARG1/ASS1/CDO1/CPS1/CRH/EGFR/GHSR/GJB2/IL10/MAOB/NEFL/NTRK3/PAPPA/PCK1/SDC1/SLIT3/STC1/WNT7B/SLIT2/ADIPOQ/IL22/TRIM63	24
BP	GO:0061041	regulation of wound healing	24/1133	148/18670	9.51513e-06	0.000289249	0.000217687	APOE/CEACAM1/CAV1/DMTN/F11/FAP/GJA1/KLKB1/KRT1/PDGFB/PDGFRA/PRKG1/PROS1/PRDX2/TSPAN8/PLPP3/CCN4/PDPN/AJAP1/SMOC2/EPPK1/PHLDB2/C1QTNF1/ADAMTS18	24
BP	GO:0030509	BMP signaling pathway	24/1133	157/18670	2.6198e-05	0.00062061	0.000467067	BMP4/BMP5/CDH5/DLX5/GDF2/MYH6/NEO1/ROR2/HTRA1/RYR2/SFRP1/SFRP2/TGFBR3/WNT5A/CHRD/FST/FSTL1/DKK1/SULF1/SOSTDC1/TMEM100/GREM2/BMPER/HES5	24
BP	GO:0006022	aminoglycan metabolic process	24/1133	170/18670	9.64576e-05	0.00160916	0.00121104	BGN/CHIT1/DCN/GPC5/FOXC1/FMOD/LUM/PDGFB/PRELP/SDC1/SDC2/PGLYRP1/NDST3/HS3ST1/GPC6/LYVE1/GALNT5/PGLYRP4/HPSE2/NDNF/ITIH5/HS6ST2/EGFLAM/CHSY3	24
BP	GO:0097529	myeloid leukocyte migration	24/1133	210/18670	0.00213528	0.0175186	0.0131844	C3AR1/EDN3/FLT1/CXCR1/LBP/CXCL9/ROR2/PDGFB/LGMN/CCL1/CCL8/CCL14/CCL16/CCL18/CCL23/XCL1/CX3CL1/CXCL12/XCL2/VEGFC/SLIT2/IL36A/CD177/MCOLN2	24
BP	GO:0008406	gonad development	24/1133	217/18670	0.0032826	0.0237316	0.0178603	FGF9/FOXC1/GJA1/HOXA9/HOXA10/HOXA11/INHBB/MMP19/PDGFRA/PGR/ROBO2/SDC1/SFRP1/SFRP2/SLIT3/SOX9/WNT5A/FZD4/UTF1/SLIT2/PCYT1B/ZFPM2/SIX4/CCDC182	24
BP	GO:0045137	development of primary sexual characteristics	24/1133	223/18670	0.00464329	0.031028	0.0233515	FGF9/FOXC1/GJA1/HOXA9/HOXA10/HOXA11/INHBB/MMP19/PDGFRA/PGR/ROBO2/SDC1/SFRP1/SFRP2/SLIT3/SOX9/WNT5A/FZD4/UTF1/SLIT2/PCYT1B/ZFPM2/SIX4/CCDC182	24
BP	GO:0046777	protein autophosphorylation	24/1133	235/18670	0.00878803	0.0511241	0.0384758	CAMK4/CAV1/EGFR/EPHA4/EPHA7/EPHB1/ERBB4/FLT1/ITK/KDR/LCK/NTRK2/DDR2/PDGFB/PDGFRA/ENPP1/PRKD1/PRKG2/PTK2/ROS1/THY1/VEGFC/ADIPOQ/WNK2	24
BP	GO:0051048	negative regulation of secretion	24/1133	238/18670	0.0101967	0.0581609	0.0437716	ADRA2C/APOE/CEACAM1/CNR1/CRH/LRRC32/GHSR/HTR1B/IL10/INHBB/KCNJ11/MAOB/PRKN/CX3CL1/SFRP1/KALRN/ADIPOQ/STXBP5L/NMU/PLA2R1/LGR4/SPX/IL33/ACVR1C	24
BP	GO:0097237	cellular response to toxic substance	24/1133	247/18670	0.0155492	0.0799347	0.0601584	APOE/ARG1/CPS1/GPR37/HBA1/HBA2/HBM/HBB/HBG2/HBQ1/IL10/KCNJ11/KDR/LCN2/MET/PRKN/PDGFB/PRDX2/TRPC6/IL18RAP/ABCG2/NXN/PRXL2A/GPX8	24
BP	GO:0071560	cellular response to transforming growth factor beta stimulus	24/1133	249/18670	0.0169977	0.0852554	0.0641627	ARG1/CAV1/CDH5/COL1A1/COL1A2/COL3A1/COL4A2/FMOD/LRRC32/LTBP2/HTRA1/PTK2/PTPRK/XCL1/SFRP1/SOX9/TGFBR3/WNT5A/ITGA8/POSTN/SOX6/PRDM16/WNT10A/ACVR1C	24
CC	GO:0030027	lamellipodium	24/1188	193/19717	0.000600816	0.00500001	0.00383751	CDH1/DPYSL3/EPHA2/CTTN/FAP/FAT1/KCNA2/MYO10/PTK2/CLRN1/CDC42BPA/UNC5C/BCAR1/PDPN/NCKAP1/WASF3/STMN2/SYNE2/CTNNA3/ENAH/PARVA/CD177/ANTXR1/PLEKHH2	24
KEGG	hsa05202	Transcriptional misregulation in cancer	24/528	192/8076	0.00157489	0.036452	0.0331564	RUNX1T1/DEFA3/ETV1/FLT1/GRIA3/TLX1/HOXA9/HOXA10/HOXA11/IGFBP3/IL2RB/MET/MLLT3/MMP9/NGFR/PBX1/PBX3/PTK2/SIX1/HMGA2/H3C1/ARNT2/SIX4/BCL11B	24
MF	GO:0019199	transmembrane receptor protein kinase activity	23/1117	79/17697	3.2623e-10	3.90544e-08	3.174e-08	EGFR/EPHA2/EPHA3/EPHA4/EPHA7/EPHB1/ERBB4/EFEMP1/FLT1/KDR/MET/MST1R/NTRK2/NTRK3/ROR2/DDR2/PDGFRA/PDGFRL/ROS1/TGFBR3/SOSTDC1/ACVR1C/EPHA10	23
MF	GO:0005506	iron ion binding	23/1117	152/17697	8.16972e-05	0.00190173	0.00154556	AOX1/CDO1/CYP2C18/CYP2J2/CYP11A1/HBA1/HBA2/HBQ1/LCN2/CYP4F3/LTF/PAH/PLOD2/PTGIS/TF/BBOX1/HEPH/CYP46A1/CYP39A1/P3H2/CYP26B1/CYP4F12/FA2H	23
MF	GO:0008514	organic anion transmembrane transporter activity	23/1117	211/17697	0.0074644	0.059011	0.047959	CEACAM1/SLC1A1/SLC1A7/SLC4A1/SLC6A1/SLC6A8/SLC6A9/SLC10A2/SLC16A2/SLCO2A1/SLC4A4/SLC17A2/SLC17A3/SLC22A7/SLCO2B1/SLCO1C1/SLC7A10/SLC7A3/SLC51B/SLC2A14/SLC16A14/SLC5A12/SLC6A19	23
BP	GO:0060349	bone morphogenesis	23/1133	114/18670	2.93379e-07	2.00374e-05	1.50801e-05	ALPL/BMP4/COL1A1/COL2A1/COL6A3/COL12A1/DLX5/FOXC1/HOXA11/LTF/MATN3/MMP13/VIT/SFRP2/SOX9/STC1/TWIST1/CYP26B1/COL21A1/OSR2/FREM1/TMEM119/VWA2	23
BP	GO:0070252	actin-mediated cell contraction	23/1133	116/18670	4.07085e-07	2.61377e-05	1.96711e-05	ANK2/CACNA2D1/CAV1/DSP/FGF12/GJA1/GJA5/KCNA5/KCNH2/KCNJ3/MYBPC2/MYH6/MYL4/RYR2/SGCD/STC1/NOS1AP/PDPN/NEDD4L/CTNNA3/PARVA/FRMD6/KCNE1B	23
BP	GO:0001837	epithelial to mesenchymal transition	23/1133	140/18670	1.16445e-05	0.000342114	0.000257473	BMP4/BMP5/COL1A1/EPHA3/FOXF2/FOXC1/FOXA1/SFRP1/SFRP2/SNAI2/SOX9/TGFBR3/TWIST1/WNT5A/HMGA2/OLFM1/PDPN/HEY1/HEY2/WWTR1/TMEM100/PHLDB2/DAB2IP	23
BP	GO:0072006	nephron development	23/1133	142/18670	1.47824e-05	0.00039867	0.000300037	BMP4/ENPEP/FOXC1/GDNF/GPR4/HOXA11/HOXB7/PBX1/PDGFB/PDGFRA/SIX1/SOX9/WNT7B/ADIPOQ/YAP1/SIX2/SULF1/WWTR1/SIX4/LGR4/FAT4/IRX2/HES5	23
BP	GO:0030534	adult behavior	23/1133	144/18670	1.86654e-05	0.000471929	0.000355171	EPHA4/FGF12/GABRG2/GDNF/GHSR/HOXB8/HTR2A/NPY/PRKN/PBX3/CXCL12/UCHL1/KALRN/NRXN3/CHL1/SHANK2/CNTNAP2/SLITRK5/PCDH17/NLGN4X/PREX2/SDK1/RNF180	23
BP	GO:1904064	positive regulation of cation transmembrane transport	23/1133	144/18670	1.86654e-05	0.000471929	0.000355171	APLNR/ANK2/ATP1B2/CACNA2D1/EDN3/FGF14/IFNG/KCNH2/KCNJ11/CXCL9/RELN/RYR2/XCL1/CX3CL1/STAC/THY1/TRPC1/NOS1AP/TRDN/CACNG4/GAL/WNK2/LRRC38	23
BP	GO:0030203	glycosaminoglycan metabolic process	23/1133	160/18670	0.000101231	0.00166888	0.00125599	BGN/DCN/GPC5/FOXC1/FMOD/LUM/PDGFB/PRELP/SDC1/SDC2/PGLYRP1/NDST3/HS3ST1/GPC6/LYVE1/GALNT5/PGLYRP4/HPSE2/NDNF/ITIH5/HS6ST2/EGFLAM/CHSY3	23
BP	GO:0050680	negative regulation of epithelial cell proliferation	23/1133	165/18670	0.000162156	0.00245338	0.0018464	APOE/CEACAM1/BMP4/CAV1/FLT1/GDF2/GJA1/NFIB/NGFR/PTN/PTPRK/ROBO1/SFRP1/SFRP2/SNAI2/SOX9/NR2F2/TGFBR3/WNT5A/SULF1/IL26/EPPK1/DAB2IP	23
BP	GO:1905330	regulation of morphogenesis of an epithelium	23/1133	180/18670	0.000580088	0.00642411	0.00483475	BMP4/GDNF/HOXB7/MLLT3/ROR1/ROR2/SFRP1/SFRP2/SIX1/SNAI2/SOX9/TBX2/WNT5A/FZD4/GPC6/SIX2/DKK1/SULF1/SIX4/LGR4/AJAP1/RSPO3/PHLDB2	23
BP	GO:0002040	sprouting angiogenesis	23/1133	183/18670	0.000731752	0.00768121	0.00578084	AGTR1/APLNR/CEACAM1/BMP4/EPHA2/FLT1/GHSR/IL10/KDR/NGFR/ROBO1/VEGFC/SLIT2/RAMP2/ESM1/PARVA/ADAMTS9/RHOJ/MMRN2/RSPO3/CCBE1/CLEC14A/BMPER	23
BP	GO:1901654	response to ketone	23/1133	193/18670	0.00151169	0.013429	0.0101066	ADCY2/ARG1/ASS1/CAV1/CPS1/CRH/EGFR/GHSR/GJB2/TNC/KCNJ11/MAOB/NEFL/NTRK3/PCK1/PRKAA2/PTN/SFRP1/SLIT3/TGFBR3/SLIT2/RAMP2/YAP1	23
BP	GO:0007266	Rho protein signal transduction	23/1133	203/18670	0.00291598	0.0220248	0.0165758	AGTR1/APOE/RND3/COL1A2/COL3A1/GPR4/MET/NGFR/RASGRF2/ROBO1/KALRN/ARHGAP29/PDPN/ARHGEF15/RHOD/RASIP1/RHOJ/PLEKHG1/ARHGEF28/PREX2/ARHGEF25/ARHGAP42/PLEKHG4B	23
BP	GO:0050679	positive regulation of epithelial cell proliferation	23/1133	206/18670	0.00350797	0.0249978	0.0188132	AGTR1/APLNR/ARG1/BMP4/BMP5/DLX5/EGFR/FGF9/GDF2/GHSR/IL10/KDR/PDGFB/PRKD1/HTRA1/PTN/CXCL12/SFRP1/SOX9/TWIST1/VEGFC/WNT5A/OSR2	23
BP	GO:0000302	response to reactive oxygen species	23/1133	232/18670	0.0141544	0.0740677	0.055743	APOD/APOE/ARG1/COL1A1/EGFR/GNAO1/GPR37/HBA1/HBA2/HBB/IL10/KCNA5/LCN2/MB/MET/MMP9/PDGFRA/PTPRK/SDC1/PRDX2/TRPC6/IL18RAP/TRPA1	23
CC	GO:0031256	leading edge membrane	23/1188	170/19717	0.000229701	0.00221144	0.00169728	ANK1/EPHA2/FAP/GABRA2/GABRE/GABRG2/KCNA2/KCNJ11/MYO1D/MYO6/PTPRK/ROBO2/THY1/ITGA8/PDPN/NCKAP1/EPB41L3/SYNE2/CNTNAP2/PACSIN1/WLS/ANTXR1/SHISA7	23
MF	GO:0015276	ligand-gated ion channel activity	22/1117	138/17697	5.21061e-05	0.00124757	0.00101391	ASIC2/GABRA2/GABRB2/GABRB3/GABRD/GABRE/GABRG2/GRIA3/GRID1/GRIK4/HTR3A/KCNH2/KCNJ3/KCNJ11/KCNJ15/KCNK1/RYR2/SCNN1B/TRPA1/MCOLN3/JPH1/MCOLN2	22
MF	GO:0022834	ligand-gated channel activity	22/1117	138/17697	5.21061e-05	0.00124757	0.00101391	ASIC2/GABRA2/GABRB2/GABRB3/GABRD/GABRE/GABRG2/GRIA3/GRID1/GRIK4/HTR3A/KCNH2/KCNJ3/KCNJ11/KCNJ15/KCNK1/RYR2/SCNN1B/TRPA1/MCOLN3/JPH1/MCOLN2	22
MF	GO:0046906	tetrapyrrole binding	22/1117	145/17697	0.000111078	0.00227033	0.00184512	CYP2C18/CYP2J2/CYP11A1/GUCY1A2/HBA1/HBA2/HBM/HBB/HBG2/HBQ1/CYP4F3/MB/NOS2/PTGIS/TCN2/TDO2/STC2/CYP46A1/CYP39A1/CYP26B1/CYP4F12/FA2H	22
MF	GO:0017171	serine hydrolase activity	22/1117	186/17697	0.00334959	0.0346538	0.0281635	ACHE/C1S/C2/F11/FAP/GZMK/CFI/KLKB1/LTF/MMP7/MMP8/MMP9/PRSS1/PRSS2/RELN/HTRA1/PRSS16/PRSS23/TMPRSS4/TMPRSS3/PRSS38/OVCH1	22
MF	GO:0005516	calmodulin binding	22/1117	200/17697	0.007893	0.0612438	0.0497736	ADD2/CEACAM1/CALD1/CAMK4/CNN3/EGFR/GEM/KCNN3/KCNQ3/MAP2/MYH6/MYO1D/MYO6/MYO10/NGFR/NOS2/PDE1A/RASGRF2/RGS16/RYR2/TJP1/CAMKV	22
BP	GO:0001656	metanephros development	22/1133	90/18670	1.38884e-08	1.64432e-06	1.2375e-06	BMP4/GDNF/HOXA11/ID3/PDGFB/PDGFRA/ROBO2/SIX1/SOX9/WNT7B/ITGA8/ADIPOQ/YAP1/SIX2/WWTR1/SIX4/LGR4/FAT4/FRAS1/OSR2/IRX2/HES5	22
BP	GO:0048704	embryonic skeletal system morphogenesis	22/1133	93/18670	2.64713e-08	2.48594e-06	1.87091e-06	BMP4/COL2A1/COL11A1/HOXA3/HOXA4/HOXA5/HOXA7/HOXA11/HOXB2/HOXB3/HOXB4/HOXB5/HOXB6/HOXB7/HOXB8/PDGFRA/PRRX1/SIX1/TWIST1/SIX2/SIX4/OSR2	22
BP	GO:0051963	regulation of synapse assembly	22/1133	106/18670	3.1561e-07	2.12794e-05	1.60147e-05	ASIC2/ADGRB3/EPHA7/EPHB1/GHSR/NTRK2/NTRK3/PTK2/PTPRD/PTPRS/ROBO2/SIX1/WNT5A/NLGN1/DKK1/FLRT3/FLRT2/SLITRK5/SIX4/LRRN1/CBLN2/LRRTM3	22
BP	GO:0001704	formation of primary germ layer	22/1133	121/18670	3.30792e-06	0.000126061	9.48725e-05	BMP4/COL4A2/COL5A1/COL8A1/COL11A1/COL12A1/EPHA2/EYA2/FOXC1/HOXA11/MMP8/MMP9/SFRP2/TAL1/WNT5A/HMGA2/ITGA8/CHRD/SIX2/DKK1/SOX17/WLS	22
BP	GO:0001508	action potential	22/1133	133/18670	1.60335e-05	0.000419504	0.000315717	ANK2/CACNA2D1/CAV1/CNR1/DSP/FGF12/FGF13/GJA1/GJA5/KCNA2/KCNA5/KCNH2/KCNJ3/NTRK2/NTRK3/RYR2/SCN3A/CACNA1I/NOS1AP/NEDD4L/CTNNA3/KCNE1B	22
BP	GO:0030879	mammary gland development	22/1133	143/18670	5.07006e-05	0.00100238	0.000754389	ARG1/BMP4/CAV1/CDO1/EPHA2/ERBB4/GJA1/GLI2/HOXA5/HOXA9/IGFBP5/IRF6/PGR/ROBO1/SOX9/TBX2/TBX3/WNT5A/WNT7B/KALRN/NRG3/SOSTDC1	22
BP	GO:0061337	cardiac conduction	22/1133	146/18670	6.98233e-05	0.00129807	0.000976921	ANK2/ATP1A4/ATP1B2/CACNA2D1/CAV1/DSP/GJA1/GJA5/KCNA5/KCNH2/KCNJ3/KCNJ11/KCNK1/NPR1/RYR2/TRPC1/ABCC9/TRDN/CACNG4/CTNNA3/KCNK15/KCNE1B	22
BP	GO:0050773	regulation of dendrite development	22/1133	149/18670	9.51289e-05	0.00160347	0.00120676	APOE/ADGRB3/BMP5/DCC/EPHA4/IL2/MARK1/NFATC4/RELN/PTN/PTPRD/PTPRS/SDC2/TRPC6/KALRN/NLGN1/SHANK2/COBL/NEDD4L/PACSIN1/DAB2IP/SDK1	22
BP	GO:0030168	platelet activation	22/1133	153/18670	0.000141408	0.00217446	0.00163648	ADRA2C/APOE/CEACAM1/CD40LG/COL1A1/COL1A2/COL3A1/DGKB/DMTN/GP5/HBB/LCK/PDGFB/PDGFRA/PRKG1/TRPC3/TRPC6/PDPN/MPIG6B/C1QTNF1/DGKK/ADAMTS18	22
BP	GO:2001236	regulation of extrinsic apoptotic signaling pathway	22/1133	155/18670	0.000171283	0.00254457	0.00191503	FASLG/BMP4/BMP5/CAV1/COL2A1/CTTN/EYA4/EYA2/GDNF/IL7/LMNA/MAL/CX3CL1/SFRP1/SFRP2/SNAI2/PRDX2/TIMP3/SRPX/YAP1/PAK5/ZSWIM2	22
BP	GO:0006941	striated muscle contraction	22/1133	174/18670	0.00087149	0.00879686	0.00662047	ANK2/CACNA2D1/CAV1/CCN2/DSP/FGF12/GJA1/GJA5/KCNA5/KCNH2/KCNJ3/MB/MYH6/MYL4/RYR2/SGCD/STAC/STC1/NOS1AP/NEDD4L/CTNNA3/KCNE1B	22
BP	GO:0048771	tissue remodeling	22/1133	179/18670	0.00126943	0.0116916	0.00879904	ARG1/BGN/CEACAM1/CAV1/EGFR/EPHA2/EPAS1/FOXC1/GJA1/GJA5/HOXA3/HTR1B/IGFBP5/IL2/IL7/MC4R/PTN/SFRP1/SEMA3C/LGR4/RSPO3/TMEM119	22
BP	GO:0022408	negative regulation of cell-cell adhesion	22/1133	181/18670	0.00146754	0.013081	0.0098447	ARG1/ASS1/CEACAM1/BMP4/CDH1/CTLA4/LRRC32/IL2/IL10/PRKG1/PTK2/XCL1/CXCL12/SNAI2/PRDX2/ADIPOQ/VSIG4/C1QTNF1/CCM2L/ADAMTS18/NEXMIF/TARM1	22
BP	GO:0001935	endothelial cell proliferation	22/1133	191/18670	0.0029017	0.0219569	0.0165247	AGTR1/APLNR/APOE/ARG1/BMP4/CAV1/EPHA2/FLT1/GDF2/GHSR/GJA1/IL10/KDR/NGFR/PDGFB/PRKD1/CXCL12/NR2F2/VEGFC/WNT5A/SULF1/BMPER	22
BP	GO:0007219	Notch signaling pathway	22/1133	193/18670	0.00329835	0.0237943	0.0179075	ASCL1/CDH6/EGFR/FOXC1/FOXA1/KCNA5/PBX1/ROBO1/ROBO2/SNAI2/SOX9/TBX2/DLK1/POSTN/DLL3/HEY1/HEY2/TMEM100/TCIM/PERP/FAT4/HES5	22
CC	GO:0030136	clathrin-coated vesicle	22/1188	188/19717	0.00218793	0.0141352	0.0108487	APOB/APOE/ASTN1/CD3G/CTLA4/EGFR/GAD1/IL7R/MYO6/ROR2/SORT1/TF/TYRP1/CLRN1/WNT5A/MALL/AP3B2/FZD4/RASSF9/CD207/STEAP2/SFTPA1	22
KEGG	hsa04514	Cell adhesion molecules	22/528	149/8076	0.000251456	0.00902097	0.00820539	CD6/CD8A/CD28/CD40LG/CDH1/CDH5/CDH15/CTLA4/NEO1/SDC1/SDC2/VCAM1/ITGA8/NRXN3/NLGN4Y/NLGN1/CNTNAP2/ICOS/NLGN4X/LRRC4C/CADM3/OCLN	22
MF	GO:0020037	heme binding	21/1117	135/17697	0.000109811	0.00227033	0.00184512	CYP2C18/CYP2J2/CYP11A1/GUCY1A2/HBA1/HBA2/HBM/HBB/HBG2/HBQ1/CYP4F3/MB/NOS2/PTGIS/TDO2/STC2/CYP46A1/CYP39A1/CYP26B1/CYP4F12/FA2H	21
MF	GO:0015081	sodium ion transmembrane transporter activity	21/1117	149/17697	0.000442621	0.00741834	0.00602897	ASIC2/ATP1A4/ATP1B2/GRIK4/KCNK1/SCN3A/SCNN1B/SLC1A1/SLC6A1/SLC6A2/SLC6A8/SLC6A9/SLC10A2/SLC12A3/SLC22A3/SLC4A4/SLC17A2/SLC17A3/ASIC4/SLC5A12/SLC6A19	21
MF	GO:0015079	potassium ion transmembrane transporter activity	21/1117	159/17697	0.00104918	0.0141808	0.0115249	ATP1A4/ATP1B2/GRIK4/KCNA2/KCNA3/KCNA5/KCNH2/KCNJ3/KCNJ11/KCNJ15/KCNK1/KCNN3/KCNQ3/SLC12A3/SNAP25/ABCC8/ABCC9/KCNK15/LRRC38/KCNT2/KCNE1B	21
MF	GO:0008236	serine-type peptidase activity	21/1117	182/17697	0.00545343	0.0488805	0.0397258	C1S/C2/F11/FAP/GZMK/CFI/KLKB1/LTF/MMP7/MMP8/MMP9/PRSS1/PRSS2/RELN/HTRA1/PRSS16/PRSS23/TMPRSS4/TMPRSS3/PRSS38/OVCH1	21
BP	GO:0001708	cell fate specification	21/1133	99/18670	3.96703e-07	2.60782e-05	1.96263e-05	ASCL1/EYA2/GLI2/FOXA1/HOXA11/NTRK3/SFRP2/SIX1/SOX1/SOX9/TBX2/TBX3/TBX18/OLIG2/SIX2/DKK1/MYT1L/TENM4/ESRP1/SOX6/SOX17	21
BP	GO:0003231	cardiac ventricle development	21/1133	130/18670	3.5729e-05	0.000766935	0.000577191	BMP4/COL11A1/DSP/FOXC1/GJA5/MYH6/ROBO1/ROBO2/RYR2/SFRP2/SLIT3/TBX3/TGFBR3/WNT5A/SLIT2/SEMA3C/ZFPM2/HEY1/HEY2/SALL4/CCM2L	21
BP	GO:0003158	endothelium development	21/1133	132/18670	4.50743e-05	0.000926579	0.000697338	CEACAM1/BMP4/CDH5/GDF2/GJA1/GJA5/HOXB5/KDR/MET/PTN/PTPRS/STC1/NR2F2/TJP1/WNT7B/PDPN/HEY1/HEY2/TMEM100/SOX17/COL18A1	21
BP	GO:0045995	regulation of embryonic development	21/1133	132/18670	4.50743e-05	0.000926579	0.000697338	BMP4/COL5A1/GDNF/IL10/LAMA4/SFRP1/SFRP2/SIX1/TBX2/PHLDA2/WNT5A/TBX18/ADIPOQ/DKK1/SULF1/TENM4/RPS6KA6/SIX4/SOX17/PHLDB2/HES5	21
BP	GO:0050729	positive regulation of inflammatory response	21/1133	153/18670	0.000379618	0.0047761	0.00359446	AGTR1/CD6/CD28/CNR1/EGFR/FFAR3/IL2/KLKB1/LBP/MMP8/CCL1/CCL14/CCL18/CX3CL1/WNT5A/CCN4/OSMR/GPRC5B/TSLP/IL33/C2CD4A	21
BP	GO:0051017	actin filament bundle assembly	21/1133	153/18670	0.000379618	0.0047761	0.00359446	ADD2/RND3/CCN2/DPYSL3/DMTN/MET/PRKN/PLS3/S100A10/CX3CL1/SFRP1/CORO2B/ARHGEF15/LIMCH1/RHOD/ASAP3/FMN2/ARHGAP28/ESPN/FHDC1/PHLDB2	21
BP	GO:0043271	negative regulation of ion transport	21/1133	157/18670	0.000538811	0.00605471	0.00455674	CAV1/CNR1/FGF12/GABRE/GEM/GNAO1/HTR1B/HTR2A/KCNH2/KEL/MAOB/MMP9/PRKG2/STC1/TWIST1/TRDN/PLA2R1/NEDD4L/WNK2/BEST3/KCNE1B	21
BP	GO:0061572	actin filament bundle organization	21/1133	157/18670	0.000538811	0.00605471	0.00455674	ADD2/RND3/CCN2/DPYSL3/DMTN/MET/PRKN/PLS3/S100A10/CX3CL1/SFRP1/CORO2B/ARHGEF15/LIMCH1/RHOD/ASAP3/FMN2/ARHGAP28/ESPN/FHDC1/PHLDB2	21
BP	GO:0050806	positive regulation of synaptic transmission	21/1133	168/18670	0.00130678	0.0120146	0.00904214	APOE/CALB2/CNR1/CRH/EGFR/EPHA4/MME/NFATC4/NTRK2/ROR2/LGMN/RELN/PTN/RAB3B/SNAP25/CYP46A1/NMU/NLGN1/SHANK2/CACNG4/SHISA7	21
BP	GO:0050796	regulation of insulin secretion	21/1133	176/18670	0.00233451	0.018888	0.014215	ADRA2C/CACNA1E/CNR1/CRH/GHSR/GJA1/IFNG/INHBB/KCNA5/KCNJ11/NOS2/PRKN/SFRP1/SNAP25/ABCC8/STXBP5L/ANO1/SYBU/G6PC2/ACVR1C/SLC30A8	21
BP	GO:0071466	cellular response to xenobiotic stimulus	21/1133	180/18670	0.00306363	0.0229837	0.0172974	ARG1/ASS1/CDO1/CRH/CYP2C18/CYP2J2/EGFR/EPHX2/FMO2/FMO3/GHR/GJB2/PCK1/PDGFB/PON3/RORA/RYR2/UGT2B15/ARNT2/CYP46A1/CYP26B1	21
BP	GO:0030308	negative regulation of cell growth	21/1133	186/18670	0.00450884	0.030439	0.0229082	DCC/EPHA7/ESR2/FGF13/FRZB/GDF2/GJA1/MAP2/NPR1/ENPP1/PTPRS/SFRP1/SFRP2/SLIT3/WNT5A/SLIT2/SEMA3C/GAL/SEMA5B/SOX17/SEMA6D	21
BP	GO:0002685	regulation of leukocyte migration	21/1133	196/18670	0.00814778	0.0483625	0.0363973	APOD/BMP5/C3AR1/EDN3/HOXA7/LBP/LGMN/PTN/CCL1/CCL8/XCL1/CXCL12/XCL2/THY1/VEGFC/WNT5A/SLIT2/CXCL14/PADI2/PLVAP/IL33	21
BP	GO:1904950	negative regulation of establishment of protein localization	21/1133	197/18670	0.00861537	0.0504546	0.0379718	APOD/APOE/DMTN/LRRC32/GHSR/IL10/INHBB/KCNJ11/PRKN/PKIA/CX3CL1/SFRP1/ADIPOQ/STXBP5L/CORO2B/LGR4/IL33/PKDCC/ACVR1C/SIAH3/USP17L2	21
BP	GO:0031099	regeneration	21/1133	198/18670	0.00910446	0.0527898	0.0397293	ANXA3/APOD/EGFR/EPHA4/ERBB4/GJA1/TNC/IL10/MYF6/NEFL/NTRK3/PRRX1/PTN/PTPRS/CXCL12/TGFBR3/THY1/LARGE1/YAP1/POSTN/EPPK1	21
BP	GO:0050870	positive regulation of T cell activation	21/1133	202/18670	0.01129	0.0625414	0.0470683	CAV1/CD6/CD28/CD40LG/CTLA4/GLI2/IFNG/IGF2/IL2/IL7/IL7R/LCK/LGALS1/XCL1/SPTA1/THY1/VCAM1/EBI3/ICOS/SIRPG/IL23R	21
BP	GO:0007163	establishment or maintenance of cell polarity	21/1133	210/18670	0.0169122	0.0852554	0.0641627	ANK1/RND3/CD3G/CDH5/DLG3/EPHB1/FAT1/FGF13/LMNA/MAP2/PTK2/WNT5A/WNT7B/RHOD/AMOTL2/PARVA/CYP26B1/RHOJ/ACTL8/PARD3B/HES5	21
BP	GO:0009612	response to mechanical stimulus	21/1133	210/18670	0.0169122	0.0852554	0.0641627	ASIC2/CHI3L1/COL1A1/COL3A1/COL11A1/DCN/EGFR/ETV1/GJA1/HTR2A/TNC/KCNA5/MMP7/PTN/RYR2/CXCL12/SOX9/TRPA1/POSTN/CNTNAP2/ANO3	21
BP	GO:1903531	negative regulation of secretion by cell	21/1133	211/18670	0.0177469	0.088131	0.0663269	ADRA2C/APOE/CEACAM1/CNR1/CRH/LRRC32/GHSR/HTR1B/IL10/INHBB/KCNJ11/MAOB/PRKN/CX3CL1/SFRP1/KALRN/ADIPOQ/STXBP5L/LGR4/IL33/ACVR1C	21
CC	GO:0098889	intrinsic component of presynaptic membrane	21/1188	82/19717	1.07639e-08	4.06545e-07	3.12023e-07	CDH9/CDH10/CHRM3/CNR1/EPHA4/ERBB4/GRIK4/HTR1B/HTR2A/HTR3A/KCNA2/KCNA3/KCNJ3/PTPRS/SLC6A1/SLC6A9/ADAM23/PCDH17/CNTN5/CADM3/RGS7BP	21
CC	GO:0042581	specific granule	21/1188	160/19717	0.000634531	0.00514061	0.00394541	ANXA3/ARG1/CEACAM1/C3AR1/CEACAM3/CEACAM8/CHI3L1/CHIT1/LCN2/LTF/MMP8/OLR1/ORM1/PTPRB/SNAP25/PGLYRP1/PRG3/OLFM4/QPCT/CD177/TARM1	21
KEGG	hsa04310	Wnt signaling pathway	21/528	160/8076	0.00165114	0.036452	0.0331564	MMP7/NFATC4/ROR1/ROR2/PPP3R2/SFRP1/SFRP2/WNT5A/WNT7B/FZD4/CCN4/WIF1/DKK1/DAAM2/LGR4/SOX17/CXXC4/WNT10A/RSPO3/RSPO1/RSPO2	21
MF	GO:0004714	transmembrane receptor protein tyrosine kinase activity	20/1117	62/17697	6.1467e-10	5.72326e-08	4.65136e-08	EGFR/EPHA2/EPHA3/EPHA4/EPHA7/EPHB1/ERBB4/EFEMP1/FLT1/KDR/MET/MST1R/NTRK2/NTRK3/ROR2/DDR2/PDGFRA/PDGFRL/ROS1/EPHA10	20
MF	GO:0022843	voltage-gated cation channel activity	20/1117	142/17697	0.000604445	0.00955708	0.00776715	CACNA1E/CACNA2D1/CNR1/HTR1B/KCNA2/KCNA3/KCNA5/KCNH2/KCNJ3/KCNJ11/KCNJ15/KCNK1/KCNQ3/SNAP25/CACNA1I/TSPOAP1/CACNG4/LRRC38/KCNT2/KCNE1B	20
BP	GO:0001570	vasculogenesis	20/1133	79/18670	3.32297e-08	2.91258e-06	2.19199e-06	APLNR/CEACAM1/CAV1/EPHA2/GDF2/KDR/NTRK2/PTK2/TGFBR3/WNT7B/FZD4/RAMP2/YAP1/ZFPM2/HEY1/HEY2/RASIP1/TMEM100/SOX17/MYO18B	20
BP	GO:0002027	regulation of heart rate	20/1133	101/18670	2.3364e-06	9.37947e-05	7.05894e-05	ADRB1/ANK2/CACNA2D1/CAV1/DSP/EDN3/EPAS1/GJA5/KCNA5/KCNH2/KCNJ3/MYH6/RYR2/SLC1A1/NOS1AP/NMU/HEY2/CTNNA3/SPX/KCNE1B	20
BP	GO:0048593	camera-type eye morphogenesis	20/1133	112/18670	1.20682e-05	0.00034854	0.00026231	BMP4/COL8A1/EPHA2/EPHB1/FAT1/FOXF2/PITX2/PTN/RORB/SOX1/SOX9/TBX2/THRB/THY1/TWIST1/WNT5A/TSPAN12/FJX1/TSKU/SDK1	20
BP	GO:0030282	bone mineralization	20/1133	114/18670	1.58417e-05	0.000416558	0.000313499	BMP4/COL1A2/GJA1/IBSP/LTF/MGP/MMP13/ROR2/DDR2/ENPP1/PHEX/PTN/SOX9/TWIST1/KL/LGR4/PKDCC/OSR2/TMEM119/RSPO2	20
BP	GO:0032963	collagen metabolic process	20/1133	115/18670	1.81e-05	0.000462076	0.000347756	ARG1/BMP4/COL1A1/COL1A2/COL5A1/COL15A1/COL19A1/CCN2/FAP/MMP7/MMP8/MMP9/MMP13/MMP19/PLOD2/PRSS2/TNXB/ADAMTS2/P3H2/MMP27	20
BP	GO:0042471	ear morphogenesis	20/1133	118/18670	2.67096e-05	0.00062153	0.00046776	NKX3-2/COL2A1/COL11A1/DLX5/FGF9/FRZB/GLI2/ROR2/PRRX1/SIX1/SOX9/TWIST1/CLRN1/WNT5A/ITGA8/SIX2/GJB6/SIX4/OSR2/LRIG3	20
BP	GO:0042552	myelination	20/1133	132/18670	0.000135768	0.00213135	0.00160404	ABCD2/ANK2/ID4/KEL/MAL/NTRK2/NTRK3/PTN/UGT8/XK/MALL/OLIG2/WASF3/EPB41L3/TENM4/TMEM98/ADGRG6/FA2H/SH3TC2/HES5	20
BP	GO:0045598	regulation of fat cell differentiation	20/1133	132/18670	0.000135768	0.00213135	0.00160404	RUNX1T1/FRZB/HTR2A/ID4/ENPP1/RORA/SORT1/SFRP1/SFRP2/SNAI2/WNT5A/CCN4/ADIPOQ/WIF1/ZFPM2/WWTR1/TRIB2/PRDM16/CCDC3/PTPRQ	20
BP	GO:0007272	ensheathment of neurons	20/1133	134/18670	0.000167402	0.00249396	0.00187694	ABCD2/ANK2/ID4/KEL/MAL/NTRK2/NTRK3/PTN/UGT8/XK/MALL/OLIG2/WASF3/EPB41L3/TENM4/TMEM98/ADGRG6/FA2H/SH3TC2/HES5	20
BP	GO:0008366	axon ensheathment	20/1133	134/18670	0.000167402	0.00249396	0.00187694	ABCD2/ANK2/ID4/KEL/MAL/NTRK2/NTRK3/PTN/UGT8/XK/MALL/OLIG2/WASF3/EPB41L3/TENM4/TMEM98/ADGRG6/FA2H/SH3TC2/HES5	20
BP	GO:0007498	mesoderm development	20/1133	135/18670	0.000185524	0.0027102	0.00203968	BMP4/EPHA2/EYA2/FOXC1/HOXA11/SFRP2/TAL1/TBX3/WNT5A/HMGA2/ITGA8/CHRD/YAP1/DLL3/SIX2/DKK1/ZFPM2/RPS6KA6/SOX17/WLS	20
BP	GO:0060048	cardiac muscle contraction	20/1133	137/18670	0.000227007	0.00315829	0.00237691	ANK2/CACNA2D1/CAV1/CCN2/DSP/FGF12/GJA1/GJA5/KCNA5/KCNH2/KCNJ3/MYH6/MYL4/RYR2/SGCD/STC1/NOS1AP/NEDD4L/CTNNA3/KCNE1B	20
BP	GO:0007612	learning	20/1133	145/18670	0.000485252	0.00562891	0.00423628	ADGRB3/CRH/FGF13/NTRK2/PRKN/LGMN/RELN/PTN/SLC6A1/SNAP25/KALRN/NRXN3/C1QL1/NLGN4Y/SHANK2/DKK1/SORCS3/CNTNAP2/PAK5/NLGN4X	20
BP	GO:0090263	positive regulation of canonical Wnt signaling pathway	20/1133	147/18670	0.000580235	0.00642411	0.00483475	CAV1/COL1A1/DLX5/EDA/EGFR/FGF9/GPC5/ROR2/SFRP1/SFRP2/YAP1/DAAM2/GPRC5B/LGR4/WNK2/WLS/RSPO3/TMEM198/RSPO1/RSPO2	20
BP	GO:0014065	phosphatidylinositol 3-kinase signaling	20/1133	148/18670	0.000633482	0.00686904	0.0051696	CEACAM1/CD28/DCN/EGFR/EPOR/ERBB4/FLT1/HTR2A/KDR/NTRK2/NTRK3/PDGFB/PDGFRA/RELN/PTK2/SOX9/TWIST1/NYAP2/PREX2/DAB2IP	20
BP	GO:0016331	morphogenesis of embryonic epithelium	20/1133	150/18670	0.000752758	0.00787029	0.00592313	BMP4/BMP5/GDNF/GLI2/PCDH8/SFRP1/SFRP2/SIX1/SOX9/TWIST1/VEGFC/WNT5A/WNT7B/TBX18/SULF1/COBL/SIX4/SALL4/IRX2/HES5	20
BP	GO:1901861	regulation of muscle tissue development	20/1133	155/18670	0.00113877	0.0107326	0.00807728	BMP4/EPHB1/ERBB4/FGF9/GJA1/IGFBP5/MYF6/SIX1/TBX2/TGFBR3/TLL2/TWIST1/YAP1/DKK1/ZFPM2/HEY2/SIX4/SOX6/CYP26B1/SOX17	20
BP	GO:0035051	cardiocyte differentiation	20/1133	167/18670	0.00280403	0.0213716	0.0160841	BMP4/EGFR/LMNA/MYBPC2/MYH6/PDGFRA/PITX2/SGCD/TBX2/TBX3/TGFBR3/TWIST1/VCAM1/SEMA3C/DKK1/HEY2/TENM4/SOX6/SOX17/MYO18B	20
BP	GO:1990138	neuron projection extension	20/1133	168/18670	0.00300636	0.0225863	0.0169983	APOE/CTTN/MAP2/NTRK3/PRKN/PTPRS/CXCL12/SLIT3/WNT5A/DCLK1/SLIT2/OLFM1/SEMA3C/POSTN/NEDD4L/FLRT3/SEMA5B/CPNE5/TMEM108/SEMA6D	20
BP	GO:0060401	cytosolic calcium ion transport	20/1133	171/18670	0.00368802	0.0261392	0.0196722	APLNR/ANK2/FASLG/CACNA2D1/CAV1/CCN2/HTR2A/LCK/CXCL9/RYR2/XCL1/CX3CL1/THY1/TRPC1/TRPC3/TRPA1/TRDN/MCOLN3/JPH1/MCOLN2	20
BP	GO:0021543	pallium development	20/1133	172/18670	0.00394201	0.0274583	0.020665	ANXA3/ASCL1/COL3A1/EGFR/FGF13/ID4/NEFL/NPY/NTRK2/RELN/PTPRS/ROBO1/SLIT2/TACC2/SYNE2/CNTNAP2/GNG12/TMEM108/FAT4/DAB2IP	20
BP	GO:0001936	regulation of endothelial cell proliferation	20/1133	176/18670	0.00510774	0.0337882	0.0254288	AGTR1/APLNR/APOE/ARG1/BMP4/CAV1/FLT1/GDF2/GHSR/GJA1/IL10/KDR/NGFR/PDGFB/PRKD1/CXCL12/NR2F2/VEGFC/WNT5A/SULF1	20
BP	GO:0048015	phosphatidylinositol-mediated signaling	20/1133	181/18670	0.00695006	0.0428995	0.0322859	CEACAM1/CD28/DCN/EGFR/EPOR/ERBB4/FLT1/HTR2A/KDR/NTRK2/NTRK3/PDGFB/PDGFRA/RELN/PTK2/SOX9/TWIST1/NYAP2/PREX2/DAB2IP	20
BP	GO:0048017	inositol lipid-mediated signaling	20/1133	184/18670	0.00829381	0.0487887	0.0367181	CEACAM1/CD28/DCN/EGFR/EPOR/ERBB4/FLT1/HTR2A/KDR/NTRK2/NTRK3/PDGFB/PDGFRA/RELN/PTK2/SOX9/TWIST1/NYAP2/PREX2/DAB2IP	20
BP	GO:1901343	negative regulation of vasculature development	20/1133	187/18670	0.00984047	0.0563737	0.0424265	FASLG/ADGRB3/BMP4/COL4A2/DCN/EPHA2/FGF9/FOXC1/GDF2/GPR4/HOXA5/NGFR/NPR1/PDGFB/PTN/SULF1/HEY2/ADAMTS9/MMRN2/DAB2IP	20
BP	GO:0051224	negative regulation of protein transport	20/1133	193/18670	0.0136263	0.0719643	0.05416	APOD/APOE/DMTN/LRRC32/GHSR/IL10/INHBB/KCNJ11/PRKN/PKIA/CX3CL1/SFRP1/ADIPOQ/STXBP5L/LGR4/IL33/PKDCC/ACVR1C/SIAH3/USP17L2	20
BP	GO:0031032	actomyosin structure organization	20/1133	199/18670	0.0184813	0.0903281	0.0679804	CNN3/CCN2/MET/MYBPC2/MYH6/PDGFRA/S100A10/SFRP1/CDC42BPA/CORO2B/ARHGEF15/LIMCH1/EPB41L3/SIX4/EPB41L4B/ASAP3/ARHGAP28/FHDC1/PHLDB2/FRMD6	20
CC	GO:0070820	tertiary granule	20/1188	164/19717	0.00208887	0.0136751	0.0104956	CEACAM1/CEACAM8/CHIT1/DSC1/DSP/HBB/LTF/MMP8/MMP9/OLR1/ORM1/PTPRB/SNAP25/PGLYRP1/PRG3/OLFM4/QPCT/CD177/CLEC4C/TARM1	20
MF	GO:0005342	organic acid transmembrane transporter activity	19/1117	153/17697	0.00359992	0.0363073	0.0295074	CEACAM1/SLC1A1/SLC1A7/SLC6A1/SLC6A8/SLC6A9/SLC10A2/SLC16A2/SLCO2A1/SLC17A2/SLC17A3/SLCO2B1/SLCO1C1/SLC7A10/SLC7A3/SLC51B/SLC16A14/SLC5A12/SLC6A19	19
MF	GO:0046943	carboxylic acid transmembrane transporter activity	19/1117	153/17697	0.00359992	0.0363073	0.0295074	CEACAM1/SLC1A1/SLC1A7/SLC6A1/SLC6A8/SLC6A9/SLC10A2/SLC16A2/SLCO2A1/SLC17A2/SLC17A3/SLCO2B1/SLCO1C1/SLC7A10/SLC7A3/SLC51B/SLC16A14/SLC5A12/SLC6A19	19
MF	GO:0004252	serine-type endopeptidase activity	19/1117	160/17697	0.00586982	0.0507104	0.0412129	C1S/C2/F11/FAP/GZMK/CFI/KLKB1/LTF/MMP7/MMP8/MMP9/PRSS1/PRSS2/HTRA1/PRSS23/TMPRSS4/TMPRSS3/PRSS38/OVCH1	19
BP	GO:0021954	central nervous system neuron development	19/1133	78/18670	1.41912e-07	1.08161e-05	8.14018e-06	ASCL1/CDH11/DCC/EPHA4/EPHB1/GLI2/MAP2/NFIB/NPY/NTRK2/PTK2/ROBO1/ROBO2/SOX1/WNT5A/DCLK1/SLIT2/TSKU/SALL3	19
BP	GO:0070098	chemokine-mediated signaling pathway	19/1133	88/18670	1.05556e-06	5.23699e-05	3.94133e-05	FOXC1/ACKR1/XCR1/CXCR1/CXCL9/ROBO1/CCL1/CCL8/CCL14/CCL16/CCL18/CCL23/XCL1/CX3CL1/CXCL12/SLIT3/XCL2/SLIT2/PADI2	19
BP	GO:0060021	roof of mouth development	19/1133	89/18670	1.26662e-06	5.84312e-05	4.3975e-05	COL2A1/DLX5/FOXF2/GABRB3/LRRC32/IRF6/PDGFRA/PRRX1/SNAI2/TBX2/TBX3/TGFBR3/TWIST1/WNT5A/MSC/PRDM16/FRAS1/PKDCC/OSR2	19
BP	GO:1903035	negative regulation of response to wounding	19/1133	90/18670	1.51532e-06	6.92963e-05	5.2152e-05	APOE/CEACAM1/EPHA4/F11/FAP/GJA1/KLKB1/KRT1/PDGFB/PDGFRA/PRKG1/PROS1/PTPRS/TSPAN8/AJAP1/EPPK1/PHLDB2/C1QTNF1/ADAMTS18	19
BP	GO:0010771	negative regulation of cell morphogenesis involved in differentiation	19/1133	97/18670	4.91602e-06	0.000170088	0.000128007	DCC/DMTN/EPHA7/FBLN1/FGF13/MAP2/NFATC4/NGFR/PTK2/PTPRS/THY1/TRPC6/WNT5A/SLIT2/SEMA3C/POSTN/NLGN1/SEMA5B/SEMA6D	19
BP	GO:1990868	response to chemokine	19/1133	97/18670	4.91602e-06	0.000170088	0.000128007	FOXC1/ACKR1/XCR1/CXCR1/CXCL9/ROBO1/CCL1/CCL8/CCL14/CCL16/CCL18/CCL23/XCL1/CX3CL1/CXCL12/SLIT3/XCL2/SLIT2/PADI2	19
BP	GO:1990869	cellular response to chemokine	19/1133	97/18670	4.91602e-06	0.000170088	0.000128007	FOXC1/ACKR1/XCR1/CXCR1/CXCL9/ROBO1/CCL1/CCL8/CCL14/CCL16/CCL18/CCL23/XCL1/CX3CL1/CXCL12/SLIT3/XCL2/SLIT2/PADI2	19
BP	GO:0035282	segmentation	19/1133	100/18670	7.8347e-06	0.000248627	0.000187116	BMP4/FOXC1/HOXD8/MLLT3/MYF6/ROR2/PCDH8/SFRP1/SFRP2/TBX3/WNT5A/TBX18/SEMA3C/DLL3/DKK1/COBL/IRX2/TDRD5/HES5	19
BP	GO:0048640	negative regulation of developmental growth	19/1133	113/18670	4.71883e-05	0.000958159	0.000721105	ADRB1/BMP4/DCC/EPHA7/FGF13/GJA1/MAP2/LGMN/PTK2/PTPRS/SFRP1/SFRP2/TLL2/WNT5A/STC2/SEMA3C/GAL/SEMA5B/SEMA6D	19
BP	GO:0045446	endothelial cell differentiation	19/1133	114/18670	5.34576e-05	0.00104124	0.000783628	CEACAM1/BMP4/CDH5/GDF2/HOXB5/KDR/MET/PTN/PTPRS/STC1/NR2F2/TJP1/WNT7B/PDPN/HEY1/HEY2/TMEM100/SOX17/COL18A1	19
BP	GO:0051928	positive regulation of calcium ion transport	19/1133	123/18670	0.000152586	0.0023327	0.00175558	APLNR/ANK2/CACNA2D1/CAV1/CRH/FGF14/CXCL9/PDGFB/RYR2/XCL1/CX3CL1/CXCL12/STAC/STC1/THY1/TRPC1/TRPC3/TRPC6/TRDN	19
BP	GO:0055076	transition metal ion homeostasis	19/1133	131/18670	0.000350709	0.00446626	0.00336128	ALAS2/EPAS1/EPB42/GDF2/LCK/LCN2/LTF/NEO1/PRKN/RHAG/TF/SLC30A4/ABCG2/HEPH/SLC22A17/ERFE/SLC30A8/STEAP2/SCARA5	19
BP	GO:0050921	positive regulation of chemotaxis	19/1133	135/18670	0.000515359	0.00585031	0.00440291	C3AR1/EDN3/KDR/LBP/MET/NTRK3/PDGFB/PRKD1/LGMN/PTN/CCL1/XCL1/CXCL12/XCL2/VEGFC/WNT5A/SLIT2/CXCL14/SMOC2	19
BP	GO:1902904	negative regulation of supramolecular fiber organization	19/1133	142/18670	0.000966201	0.00944471	0.00710803	ADD2/APOE/CDH5/DMTN/FGF13/MAP2/MET/PRKN/SPTA1/SPTB/SLIT2/TUBB4A/CORO2B/TMSB15A/STMN2/ARHGAP28/NAV3/PHLDB2/PLEKHH2	19
BP	GO:0051494	negative regulation of cytoskeleton organization	19/1133	148/18670	0.00158817	0.0138971	0.0104589	ADD2/CDH5/DMTN/FGF13/MAP2/MET/PRKN/SPTA1/SPTB/SLIT2/TUBB4A/CORO2B/TMSB15A/STMN2/ARHGAP28/ESPN/NAV3/PHLDB2/PLEKHH2	19
BP	GO:0016202	regulation of striated muscle tissue development	19/1133	152/18670	0.00216897	0.0177122	0.0133301	BMP4/EPHB1/ERBB4/FGF9/GJA1/MYF6/SIX1/TBX2/TGFBR3/TLL2/TWIST1/YAP1/DKK1/ZFPM2/HEY2/SIX4/SOX6/CYP26B1/SOX17	19
BP	GO:0042133	neurotransmitter metabolic process	19/1133	153/18670	0.00233929	0.0188976	0.0142222	ACHE/ASS1/CAV1/CHAT/CPS1/GAD1/HBB/IFNG/IL10/MAOA/MAOB/MMP8/NOS2/PAH/PTGIS/RORA/NOS1AP/PRG3/RNF180	19
BP	GO:0048634	regulation of muscle organ development	19/1133	156/18670	0.00291905	0.0220248	0.0165758	BMP4/EPHB1/ERBB4/FGF9/GJA1/MYF6/SIX1/TBX2/TGFBR3/TLL2/TWIST1/YAP1/DKK1/ZFPM2/HEY2/SIX4/SOX6/CYP26B1/SOX17	19
BP	GO:0060402	calcium ion transport into cytosol	19/1133	158/18670	0.00336868	0.024169	0.0181895	APLNR/ANK2/FASLG/CACNA2D1/CAV1/HTR2A/LCK/CXCL9/RYR2/XCL1/CX3CL1/THY1/TRPC1/TRPC3/TRPA1/TRDN/MCOLN3/JPH1/MCOLN2	19
BP	GO:0002673	regulation of acute inflammatory response	19/1133	159/18670	0.00361424	0.0256509	0.0193047	A2M/C1S/C2/C3AR1/C4B/C7/CD5L/CNR1/CPN2/CR1L/CR2/DNASE1L3/FFAR3/CFI/KLKB1/PROS1/OSMR/VSIG4/C2CD4A	19
BP	GO:0046661	male sex differentiation	19/1133	160/18670	0.00387449	0.0272119	0.0204795	BMP5/FGF9/GJA1/HOXA9/HOXA10/HOXA11/ROR2/PDGFRA/SDC1/SFRP1/SFRP2/SOX9/TBX3/WNT5A/UTF1/SYCP2/ZFPM2/SIX4/LGR4	19
BP	GO:0015698	inorganic anion transport	19/1133	169/18670	0.00699127	0.0429461	0.032321	CLCA1/CLCN4/GABRA2/GABRB2/GABRB3/GABRD/GABRE/GABRG2/ENPP1/PRKG2/ROS1/SLC1A1/SLC4A1/SLC12A3/SLC4A4/SLC17A3/CLIC5/ANO1/BEST3	19
BP	GO:0010634	positive regulation of epithelial cell migration	19/1133	171/18670	0.00790578	0.0470855	0.0354363	ANXA3/BMP4/IFNG/KDR/MET/MMP9/PDGFB/PRKD1/LGMN/SOX9/VEGFC/WNT5A/PLPP3/BCAR1/SASH1/EPB41L4B/RHOJ/SMOC2/CCBE1	19
BP	GO:0010469	regulation of signaling receptor activity	19/1133	173/18670	0.00891467	0.0518036	0.0389871	ADRA2C/ANXA3/CRH/DLG3/ESR2/GRIA3/IFNG/IL10/MUC4/NEFL/RELN/TAL1/PHLDA2/NLGN1/SHANK2/DKK1/CACNG4/GREM2/SHISA7	19
BP	GO:0002695	negative regulation of leukocyte activation	19/1133	175/18670	0.0100246	0.0573039	0.0431266	ARG1/CEACAM1/BMP4/CNR1/CTLA4/LRRC32/IL2/IL10/XCL1/CX3CL1/SFRP1/PRDX2/PGLYRP1/VSIG4/TNFRSF13B/GAL/PGLYRP4/ADGRF5/TARM1	19
BP	GO:0051897	positive regulation of protein kinase B signaling	19/1133	176/18670	0.0106197	0.0603772	0.0454396	CD28/CHI3L1/EGFR/ERBB4/FGF9/IGF2/IGFBP5/LCK/MET/MST1R/PDGFB/PDGFRA/PTK2/CX3CL1/KL/NRG2/ICOS/IL26/C1QTNF1	19
BP	GO:0048469	cell maturation	19/1133	177/18670	0.0112426	0.0624338	0.0469873	ASCL1/ADGRB3/EPAS1/EPB42/GJA1/FOXA1/HOXA5/PAEP/PGR/CX3CL1/TAL1/C1QL1/CNTNAP2/TFCP2L1/GAL/TDRD5/BHLHA15/SLFN14/HES5	19
BP	GO:0090090	negative regulation of canonical Wnt signaling pathway	19/1133	178/18670	0.0118942	0.0652261	0.0490888	APOE/CAV1/FRZB/IGFBP4/MLLT3/ROR2/PRKN/SFRP1/SFRP2/SNAI2/SOX9/WNT5A/TBX18/DKK1/SOSTDC1/WWTR1/SOX17/TLE6/DAB2IP	19
BP	GO:0046328	regulation of JNK cascade	19/1133	185/18670	0.0173363	0.0865007	0.0650999	CD40LG/CCN2/EGFR/EPHA4/EPHB1/MECOM/MMP8/ROR2/PRKN/SFRP1/SFRP2/WNT5A/WNT7B/FZD4/DKK1/SASH1/IL36A/DAB2IP/SH3RF2	19
BP	GO:0055001	muscle cell development	19/1133	186/18670	0.0182505	0.090037	0.0677613	ANK2/BMP4/KEL/LMNA/MYBPC2/MYF6/MYH6/NFATC4/PDGFRA/SDC1/SGCD/SIX1/TBX3/UCHL1/XK/RAMP2/HEY2/SIX4/MYO18B	19
BP	GO:1905475	regulation of protein localization to membrane	19/1133	187/18670	0.0192016	0.0934188	0.0703065	EGFR/EPHA2/DMTN/EPHA3/GPC5/GHSR/IFNG/KCNJ11/PRKN/PTN/STAC/GPC6/PPP1R13B/PID1/PKDCC/SLC51B/LRRC15/USP17L2/SHISA7	19
CC	GO:0099056	integral component of presynaptic membrane	19/1188	73/19717	4.03446e-08	1.10051e-06	8.44642e-07	CDH9/CDH10/CHRM3/CNR1/EPHA4/ERBB4/GRIK4/HTR1B/HTR2A/HTR3A/KCNA2/KCNA3/KCNJ3/PTPRS/SLC6A1/SLC6A9/ADAM23/PCDH17/CADM3	19
CC	GO:0099634	postsynaptic specialization membrane	19/1188	101/19717	8.25992e-06	0.000118148	9.06787e-05	ADRA2C/CDH10/CHRM3/DCC/DLG3/EPHA7/ERBB4/GABRB2/GRID1/PTPRS/PLPPR4/NLGN1/SORCS3/CACNG4/LRFN2/LRRC4C/LRRTM3/RGS7BP/SHISA7	19
CC	GO:0005913	cell-cell adherens junction	19/1188	117/19717	7.01923e-05	0.000783282	0.000601169	CDH1/CDH5/CDH6/CDH8/CDH9/CDH10/CDH11/CDH15/CNN3/DSP/GJA1/TJP1/CTNNA3/AJAP1/CDH22/NECTIN4/HMCN1/IGSF21/PARD3B	19
CC	GO:0031225	anchored component of membrane	19/1188	170/19717	0.0069235	0.0381959	0.0293153	ACHE/ALPL/ART4/CEACAM8/GPC5/GFRA1/GFRA3/RAB3B/THY1/GPC6/MSLN/CNTN5/PRMT8/CD177/ULBP2/IGSF21/LYPD4/GPIHBP1/RGS7BP	19
KEGG	hsa04061	Viral protein interaction with cytokine and cytokine receptor	19/528	100/8076	2.047e-05	0.000966619	0.000879228	XCR1/IL2/IL2RB/CXCR1/IL10/CXCL9/CCL1/CCL8/CCL14/CCL16/CCL18/CCL23/XCL1/CX3CL1/CXCL12/XCL2/IL18RAP/CXCL14/IL34	19
MF	GO:0030020	extracellular matrix structural constituent conferring tensile strength	18/1117	41/17697	1.11402e-11	2.33388e-09	1.89677e-09	COL1A1/COL1A2/COL2A1/COL3A1/COL4A1/COL4A2/COL5A1/COL6A3/COL8A1/COL9A2/COL11A1/COL12A1/COL15A1/COL16A1/COL19A1/COL5A3/COL18A1/COL21A1	18
MF	GO:0005267	potassium channel activity	18/1117	123/17697	0.000703492	0.0105273	0.00855563	GRIK4/KCNA2/KCNA3/KCNA5/KCNH2/KCNJ3/KCNJ11/KCNJ15/KCNK1/KCNN3/KCNQ3/SNAP25/ABCC8/ABCC9/KCNK15/LRRC38/KCNT2/KCNE1B	18
MF	GO:0019955	cytokine binding	18/1117	128/17697	0.00112992	0.0146605	0.0119147	A2M/ACKR1/LRRC32/GHR/XCR1/IL2RB/IL5RA/CXCR1/LIFR/TGFBR3/FZD4/CHRD/OSMR/EBI3/PDPN/SOSTDC1/GREM2/IL23R	18
MF	GO:0005319	lipid transporter activity	18/1117	131/17697	0.00147888	0.0177043	0.0143885	APOB/APOD/APOE/CEACAM1/SLC10A2/SLCO2A1/ABCA9/ABCA8/SLCO2B1/ABCA6/OSBP2/SLCO1C1/PLSCR4/ANO3/OSBPL6/SLC51B/ABCA13/SFTPA1	18
MF	GO:0070851	growth factor receptor binding	18/1117	134/17697	0.00191503	0.0225547	0.0183305	CDH5/ERBB4/EFEMP1/FGF9/IL2/IL7/IL10/PDGFB/PDGFRA/VEGFC/KL/ESM1/FLRT3/FLRT2/IL36A/TSLP/IL23R/DAB2IP	18
MF	GO:0015103	inorganic anion transmembrane transporter activity	18/1117	146/17697	0.00488687	0.0450022	0.0365738	CLCA1/CLCN4/GABRA2/GABRB2/GABRB3/GABRD/GABRE/GABRG2/SLC1A1/SLC4A1/SLC6A2/SLC12A3/SLC22A3/SLC4A4/SLC17A3/CLIC5/ANO1/BEST3	18
MF	GO:0016705	oxidoreductase activity, acting on paired donors, with incorporation or reduction of molecular oxygen	18/1117	159/17697	0.0115847	0.0822707	0.0668624	CYP2C18/CYP2J2/CYP11A1/FMO2/FMO3/CYP4F3/NOS2/PAH/PLOD2/PTGIS/TYRP1/BBOX1/CYP46A1/CYP39A1/P3H2/CYP26B1/CYP4F12/NLRP11	18
BP	GO:0003151	outflow tract morphogenesis	18/1133	79/18670	8.74962e-07	4.64791e-05	3.49799e-05	BMP4/FOXC1/GJA5/PITX2/ROBO1/ROBO2/SFRP2/SIX1/TBX2/TBX3/TGFBR3/TWIST1/WNT5A/SEMA3C/ZFPM2/HEY2/PARVA/SOX17	18
BP	GO:1901888	regulation of cell junction assembly	18/1133	88/18670	4.57291e-06	0.000164719	0.000123966	APOD/CAV1/COL16A1/EPHA2/DMTN/EPHA3/GJA1/KDR/PTK2/S100A10/SFRP1/SNAI2/THY1/TJP1/LIMCH1/RHOD/PHLDB2/OCLN	18
BP	GO:0001823	mesonephros development	18/1133	102/18670	3.82663e-05	0.000808202	0.000608248	BMP4/FOXC1/GDNF/HOXA11/HOXB7/PBX1/ROBO2/SDC1/SFRP1/SIX1/SOX9/SLIT2/SIX2/SIX4/LGR4/FAT4/OSR2/BMPER	18
BP	GO:0015696	ammonium transport	18/1133	108/18670	8.33245e-05	0.00147048	0.00110668	CNR1/CRH/GDNF/HTR1B/HTR2A/KCNA2/MAOB/PRKN/RAB3B/RHAG/RHCE/RHD/CXCL12/SLC6A2/SLC6A8/SLC22A3/RHCG/SYT6	18
BP	GO:0072009	nephron epithelium development	18/1133	109/18670	9.42399e-05	0.00159359	0.00119933	BMP4/FOXC1/GDNF/HOXA11/HOXB7/PBX1/SIX1/SOX9/WNT7B/ADIPOQ/YAP1/SIX2/WWTR1/SIX4/LGR4/FAT4/IRX2/HES5	18
BP	GO:0003279	cardiac septum development	18/1133	112/18670	0.000134908	0.00213058	0.00160346	ANK2/BMP4/BMP5/GJA5/ROBO1/ROBO2/SLIT3/TBX2/TBX3/TGFBR3/WNT5A/SLIT2/SEMA3C/ZFPM2/HEY1/HEY2/PARVA/SALL4	18
BP	GO:1990266	neutrophil migration	18/1133	118/18670	0.00026444	0.00359944	0.00270892	C3AR1/EDN3/CXCR1/LBP/CXCL9/CCL1/CCL8/CCL14/CCL16/CCL18/CCL23/XCL1/CX3CL1/XCL2/SLIT2/IL36A/CD177/MCOLN2	18
BP	GO:0001952	regulation of cell-matrix adhesion	18/1133	119/18670	0.000294234	0.00391741	0.00294822	APOD/COL16A1/DMTN/EPHA3/HOXA7/KDR/DDR2/PTK2/S100A10/CX3CL1/SFRP1/THY1/POSTN/LIMCH1/RHOD/AJAP1/PHLDB2/NEXMIF	18
BP	GO:0034101	erythrocyte homeostasis	18/1133	122/18670	0.000401802	0.00496984	0.00374027	ALAS2/BMP4/EPAS1/EPB42/DMTN/HOXA5/HOXB6/MB/RHAG/SLC4A1/TAL1/TGFBR3/TRIM10/KLF1/AHSP/SOX6/MPIG6B/ADGRF5	18
BP	GO:0032355	response to estradiol	18/1133	134/18670	0.00124065	0.0114668	0.00862983	APOB/ASS1/COL1A1/CCN2/EGFR/GHSR/GJA1/GJB2/FOXA1/IL10/KCNJ11/PTN/SFRP1/SLC6A1/NR2F2/ARNT2/RAMP2/POSTN	18
BP	GO:0097530	granulocyte migration	18/1133	141/18670	0.00221605	0.0180127	0.0135563	C3AR1/EDN3/CXCR1/LBP/CXCL9/CCL1/CCL8/CCL14/CCL16/CCL18/CCL23/XCL1/CX3CL1/XCL2/SLIT2/IL36A/CD177/MCOLN2	18
BP	GO:0048813	dendrite morphogenesis	18/1133	143/18670	0.00259119	0.0203389	0.0153069	ADGRB3/EPHA4/EPHB1/MAP2/NFATC4/RELN/PTN/PTPRD/SDC2/TRPC6/KALRN/DCLK1/NLGN1/ZNF365/SHANK2/NEDD4L/SLITRK5/PREX2	18
BP	GO:0060041	retina development in camera-type eye	18/1133	144/18670	0.00279779	0.021355	0.0160717	ACHE/COL4A1/NTRK2/PDGFRA/PTN/RORB/SOX9/THRB/THY1/TUB/FZD4/ARHGEF15/TSPAN12/FJX1/VAX2/RHOJ/SDK1/RD3	18
BP	GO:0002262	myeloid cell homeostasis	18/1133	147/18670	0.00350166	0.0249867	0.0188049	ALAS2/BMP4/EPAS1/EPB42/DMTN/HOXA5/HOXB6/MB/RHAG/SLC4A1/TAL1/TGFBR3/TRIM10/KLF1/AHSP/SOX6/MPIG6B/ADGRF5	18
BP	GO:0090288	negative regulation of cellular response to growth factor stimulus	18/1133	166/18670	0.0121275	0.0663668	0.0499473	CAV1/DCN/HTRA1/SFRP1/SFRP2/TGFBR3/WNT5A/CHRD/SLIT2/DKK1/SULF1/SOSTDC1/PRDM16/GREM2/MMRN2/DAB2IP/BMPER/SHISA2	18
BP	GO:0048660	regulation of smooth muscle cell proliferation	18/1133	169/18670	0.0143895	0.0748509	0.0563324	APOD/BMP4/EGFR/FGF9/HTR1B/IFNG/IGFBP3/IGFBP5/IL10/MMP9/NPR1/PDE1A/PDGFB/PRKG1/CX3CL1/CCN4/ADIPOQ/HES5	18
BP	GO:0060538	skeletal muscle organ development	18/1133	169/18670	0.0143895	0.0748509	0.0563324	ASS1/CAV1/COL19A1/DCN/EPHB1/KEL/MYF6/SIX1/NR2F2/TLL2/TWIST1/XK/LARGE1/MSC/DKK1/SIX4/CYP26B1/SOX17	18
BP	GO:0099643	signal release from synapse	18/1133	170/18670	0.0152128	0.0786667	0.0592041	CHAT/CNR1/GAD1/HTR1B/HTR2A/PRKN/SLC6A9/SNAP25/SYN3/PPFIA2/TSPOAP1/STXBP5L/CPLX1/NLGN1/RPH3A/PCLO/CADPS2/SYT6	18
BP	GO:0006937	regulation of muscle contraction	18/1133	171/18670	0.0160724	0.0818247	0.0615808	ADRA2C/ANK2/CAV1/CHRM3/CCN2/DSP/CTTN/FGF13/GHSR/GJA5/PRKG1/RYR2/STC1/NOS1AP/NMU/CTNNA3/SPX/ARHGAP42	18
BP	GO:0048659	smooth muscle cell proliferation	18/1133	171/18670	0.0160724	0.0818247	0.0615808	APOD/BMP4/EGFR/FGF9/HTR1B/IFNG/IGFBP3/IGFBP5/IL10/MMP9/NPR1/PDE1A/PDGFB/PRKG1/CX3CL1/CCN4/ADIPOQ/HES5	18
CC	GO:0098948	intrinsic component of postsynaptic specialization membrane	18/1188	77/19717	5.27747e-07	1.12663e-05	8.64685e-06	ADRA2C/CDH10/CHRM3/DCC/EPHA7/ERBB4/GABRB2/GRID1/PTPRS/PLPPR4/NLGN1/SORCS3/CACNG4/LRFN2/LRRC4C/LRRTM3/RGS7BP/SHISA7	18
CC	GO:0019897	extrinsic component of plasma membrane	18/1188	165/19717	0.0107018	0.0520293	0.0399324	CDH1/CDH5/CDH6/CDH8/CDH9/CDH10/CDH11/CDH15/GNAO1/GNG11/LCK/S100A10/SNAP25/STAC/TF/GNG12/CDH22/MYZAP	18
CC	GO:0030426	growth cone	18/1188	171/19717	0.0150693	0.0691499	0.0530725	CNR1/DLG3/DPYSL3/CTTN/EPHA4/FGF13/MAP2/NEFL/SNAP25/THY1/UNC5C/OLFM1/STMN2/SHANK2/COBL/FLRT3/TENM2/STMN4	18
CC	GO:0030427	site of polarized growth	18/1188	176/19717	0.0196799	0.0862755	0.0662164	CNR1/DLG3/DPYSL3/CTTN/EPHA4/FGF13/MAP2/NEFL/SNAP25/THY1/UNC5C/OLFM1/STMN2/SHANK2/COBL/FLRT3/TENM2/STMN4	18
KEGG	hsa04512	ECM-receptor interaction	18/528	88/8076	1.17108e-05	0.000840252	0.000764286	COL1A1/COL1A2/COL2A1/COL4A1/COL4A2/COL6A3/COL9A2/GP5/TNC/IBSP/LAMA4/RELN/SDC1/TNXB/ITGA8/FRAS1/FREM1/FREM2	18
MF	GO:0004896	cytokine receptor activity	17/1117	96/17697	9.62601e-05	0.00212279	0.00172522	EPOR/GFRA1/GHR/XCR1/IL2RB/IL5RA/IL7R/CXCR1/LIFR/FZD4/IL18RAP/OSMR/EBI3/IL17RE/IL23R/IFNLR1/IL17REL	17
BP	GO:0030199	collagen fibril organization	17/1133	54/18670	1.01081e-08	1.36304e-06	1.02582e-06	COL1A1/COL1A2/COL2A1/COL3A1/COL5A1/COL11A1/COL12A1/FOXC1/FMOD/LUM/DDR2/PLOD2/SFRP2/TNXB/ADAMTS2/COL5A3/LOXL4	17
BP	GO:0086003	cardiac muscle cell contraction	17/1133	69/18670	5.37784e-07	3.07413e-05	2.31358e-05	ANK2/CACNA2D1/CAV1/DSP/FGF12/GJA1/GJA5/KCNA5/KCNH2/KCNJ3/RYR2/SGCD/STC1/NOS1AP/NEDD4L/CTNNA3/KCNE1B	17
BP	GO:0060350	endochondral bone morphogenesis	17/1133	73/18670	1.26558e-06	5.84312e-05	4.3975e-05	ALPL/BMP4/COL1A1/COL2A1/COL6A3/COL12A1/DLX5/FOXC1/HOXA11/MATN3/MMP13/VIT/SOX9/STC1/COL21A1/TMEM119/VWA2	17
BP	GO:0061045	negative regulation of wound healing	17/1133	76/18670	2.30259e-06	9.37947e-05	7.05894e-05	APOE/CEACAM1/F11/FAP/GJA1/KLKB1/KRT1/PDGFB/PDGFRA/PRKG1/PROS1/TSPAN8/AJAP1/EPPK1/PHLDB2/C1QTNF1/ADAMTS18	17
BP	GO:0030193	regulation of blood coagulation	17/1133	79/18670	4.05117e-06	0.000150036	0.000112916	APOE/CEACAM1/CAV1/DMTN/F11/FAP/KLKB1/KRT1/PDGFB/PDGFRA/PRKG1/PROS1/PRDX2/TSPAN8/PDPN/C1QTNF1/ADAMTS18	17
BP	GO:1900046	regulation of hemostasis	17/1133	80/18670	4.85679e-06	0.000170088	0.000128007	APOE/CEACAM1/CAV1/DMTN/F11/FAP/KLKB1/KRT1/PDGFB/PDGFRA/PRKG1/PROS1/PRDX2/TSPAN8/PDPN/C1QTNF1/ADAMTS18	17
BP	GO:0050818	regulation of coagulation	17/1133	84/18670	9.71472e-06	0.000292704	0.000220287	APOE/CEACAM1/CAV1/DMTN/F11/FAP/KLKB1/KRT1/PDGFB/PDGFRA/PRKG1/PROS1/PRDX2/TSPAN8/PDPN/C1QTNF1/ADAMTS18	17
BP	GO:0030510	regulation of BMP signaling pathway	17/1133	91/18670	2.92342e-05	0.000662047	0.000498253	BMP4/CDH5/GDF2/NEO1/HTRA1/SFRP1/SFRP2/WNT5A/CHRD/FST/FSTL1/DKK1/SULF1/SOSTDC1/GREM2/BMPER/HES5	17
BP	GO:0003073	regulation of systemic arterial blood pressure	17/1133	93/18670	3.91271e-05	0.000819798	0.000616975	ASIC2/ADRB1/AGTR1/CRH/EDN3/ENPEP/GJA1/GJA5/MME/PDGFB/NR2F2/CORO2B/POSTN/CYP4F12/SPX/NAV2/ARHGAP42	17
BP	GO:0060993	kidney morphogenesis	17/1133	94/18670	4.51044e-05	0.000926579	0.000697338	BMP4/GDNF/HOXA11/HOXB7/PBX1/SIX1/SOX9/WNT7B/SIX2/WWTR1/GCNT4/SIX4/LGR4/FAT4/FRAS1/IRX2/HES5	17
BP	GO:0061326	renal tubule development	17/1133	95/18670	5.18751e-05	0.00101795	0.000766105	BMP4/COL4A1/GDNF/HOXA11/HOXB7/PBX1/SIX1/SOX9/WNT7B/YAP1/SIX2/WWTR1/SIX4/LGR4/FAT4/IRX2/HES5	17
BP	GO:0001657	ureteric bud development	17/1133	97/18670	6.81595e-05	0.00127563	0.000960029	BMP4/FOXC1/GDNF/HOXA11/HOXB7/PBX1/ROBO2/SDC1/SFRP1/SIX1/SOX9/SLIT2/SIX2/SIX4/LGR4/FAT4/BMPER	17
BP	GO:0072163	mesonephric epithelium development	17/1133	98/18670	7.7875e-05	0.00141449	0.00106454	BMP4/FOXC1/GDNF/HOXA11/HOXB7/PBX1/ROBO2/SDC1/SFRP1/SIX1/SOX9/SLIT2/SIX2/SIX4/LGR4/FAT4/BMPER	17
BP	GO:0072164	mesonephric tubule development	17/1133	98/18670	7.7875e-05	0.00141449	0.00106454	BMP4/FOXC1/GDNF/HOXA11/HOXB7/PBX1/ROBO2/SDC1/SFRP1/SIX1/SOX9/SLIT2/SIX2/SIX4/LGR4/FAT4/BMPER	17
BP	GO:0032414	positive regulation of ion transmembrane transporter activity	17/1133	104/18670	0.000166013	0.00248736	0.00187197	ANK2/ATP1B2/CACNA2D1/FGF14/HTR3A/IFNG/KCNJ11/RELN/RYR2/STAC/TRPC6/NOS1AP/TRDN/CACNG4/GAL/WNK2/LRRC38	17
BP	GO:0021510	spinal cord development	17/1133	106/18670	0.00021044	0.00299109	0.00225108	ASCL1/DCC/GDNF/GLI2/HOXB8/NEFL/PBX3/VIT/RELN/PTN/PTPRS/ROBO2/SOX1/TAL1/CHRD/OLIG2/DAAM2	17
BP	GO:0032526	response to retinoic acid	17/1133	108/18670	0.000264876	0.00359944	0.00270892	ASCL1/COL1A1/EPHA3/GJA1/GJB2/TNC/NTRK3/PCK1/RORB/SOX9/WNT5A/WNT7B/FZD4/LRAT/YAP1/DKK1/CYP26B1	17
BP	GO:0032411	positive regulation of transporter activity	17/1133	112/18670	0.000411293	0.00503021	0.00378571	ANK2/ATP1B2/CACNA2D1/FGF14/HTR3A/IFNG/KCNJ11/RELN/RYR2/STAC/TRPC6/NOS1AP/TRDN/CACNG4/GAL/WNK2/LRRC38	17
BP	GO:0043200	response to amino acid	17/1133	113/18670	0.000457293	0.00542868	0.00408559	ARG1/ASS1/CDO1/COL1A1/COL1A2/COL3A1/COL4A1/COL16A1/CPS1/CCN2/EGFR/NTRK2/PCK1/PDGFRA/PTN/SIX1/CPEB1	17
BP	GO:0030218	erythrocyte differentiation	17/1133	114/18670	0.000507658	0.00585031	0.00440291	ALAS2/BMP4/EPAS1/EPB42/DMTN/HOXA5/MB/RHAG/SLC4A1/TAL1/TGFBR3/TRIM10/KLF1/AHSP/SOX6/MPIG6B/ADGRF5	17
BP	GO:0021987	cerebral cortex development	17/1133	116/18670	0.000622838	0.00678158	0.00510378	ASCL1/COL3A1/EGFR/FGF13/NEFL/NPY/NTRK2/RELN/PTPRS/ROBO1/SLIT2/TACC2/SYNE2/CNTNAP2/GNG12/FAT4/DAB2IP	17
BP	GO:0003014	renal system process	17/1133	120/18670	0.00092156	0.00909285	0.00684323	ADCY2/AGTR1/BMP4/GJA1/GJA5/HBB/NPR1/PDGFB/LGMN/SLC4A1/STC1/ADIPOQ/CORO2B/SULF1/CYP4F12/SPX/ADGRF5	17
BP	GO:0072089	stem cell proliferation	17/1133	120/18670	0.00092156	0.00909285	0.00684323	ASCL1/MECOM/FBLN1/FGF13/ID4/PTN/CX3CL1/SFRP2/SNAI2/TBX3/VEGFC/WNT5A/WNT7B/HMGA2/YAP1/SIX2/SOX17	17
BP	GO:0010811	positive regulation of cell-substrate adhesion	17/1133	121/18670	0.00101292	0.00979214	0.00736951	COL8A1/COL16A1/DMTN/KDR/VIT/PTN/S100A10/CX3CL1/SFRP1/THY1/OLFM4/EGFL6/SMOC2/NDNF/MMRN2/EMILIN3/EGFLAM	17
BP	GO:0014066	regulation of phosphatidylinositol 3-kinase signaling	17/1133	124/18670	0.00133451	0.0121632	0.00915398	CEACAM1/CD28/DCN/EGFR/EPOR/ERBB4/FLT1/KDR/NTRK2/NTRK3/PDGFB/PDGFRA/RELN/PTK2/SOX9/TWIST1/DAB2IP	17
BP	GO:0045667	regulation of osteoblast differentiation	17/1133	126/18670	0.00159375	0.0139228	0.0104782	BMP4/ID3/IGFBP5/LTF/DDR2/PRKD1/PTK2/RORB/SFRP1/SFRP2/SNAI2/TWIST1/WNT7B/CHRD/CCN4/SMOC1/TMEM119	17
BP	GO:0031644	regulation of neurological system process	17/1133	137/18670	0.00389738	0.0272557	0.0205125	ADRA2C/FGF12/GHSR/IL10/RELN/WASF3/NMU/NLGN1/SHANK2/TENM4/TMEM98/CACNG4/TMEM100/NLGN4X/TMEM108/SPX/SHISA7	17
BP	GO:0060078	regulation of postsynaptic membrane potential	17/1133	140/18670	0.00486517	0.0322647	0.0242822	ADRB1/FGF14/GABRA2/GABRB2/GABRB3/GABRD/GABRE/GABRG2/GRIA3/GRID1/GRIK4/RELN/NLGN1/SHANK2/NLGN4X/TMEM108/RGS7BP	17
BP	GO:0097553	calcium ion transmembrane import into cytosol	17/1133	140/18670	0.00486517	0.0322647	0.0242822	APLNR/ANK2/FASLG/CACNA2D1/HTR2A/LCK/CXCL9/RYR2/XCL1/CX3CL1/THY1/TRPC1/TRPA1/TRDN/MCOLN3/JPH1/MCOLN2	17
BP	GO:0045834	positive regulation of lipid metabolic process	17/1133	146/18670	0.00739058	0.0443688	0.0333917	AGTR1/ABCD2/APOC1/APOE/EEF1A2/FLT1/GHSR/HTR2A/IFNG/PDGFB/PDGFRA/PRKD1/PTK2/TWIST1/ADIPOQ/CCDC3/ADGRF5	17
BP	GO:0035148	tube formation	17/1133	148/18670	0.00843541	0.049511	0.0372617	BMP4/BMP5/EDA/GDNF/NFIB/SFRP1/SFRP2/SIX1/SOX9/TWIST1/WNT5A/COBL/SIX4/SALL4/DAB2IP/IRX2/HES5	17
BP	GO:0071774	response to fibroblast growth factor	17/1133	150/18670	0.00959536	0.0550895	0.0414601	COL1A1/CPS1/CCN2/FGF9/FGF12/TNC/SFRP1/WNT5A/KL/POSTN/SULF1/FLRT3/FLRT2/ESRP1/SMOC2/FAT4/SHISA2	17
BP	GO:0055067	monovalent inorganic cation homeostasis	17/1133	154/18670	0.0122948	0.0672126	0.0505838	AGTR1/FASLG/ATP1A4/ATP1B2/C7/KCNA5/KCNH2/NPR1/SCNN1B/SLC4A1/SLC12A3/SLC4A4/NEDD4L/RHCG/TMPRSS3/CYP4F12/SPX	17
CC	GO:0099060	integral component of postsynaptic specialization membrane	17/1188	74/19717	1.41136e-06	2.56659e-05	1.96986e-05	ADRA2C/CDH10/CHRM3/DCC/EPHA7/ERBB4/GABRB2/GRID1/PTPRS/PLPPR4/NLGN1/SORCS3/CACNG4/LRFN2/LRRC4C/LRRTM3/SHISA7	17
CC	GO:0034705	potassium channel complex	17/1188	96/19717	5.46279e-05	0.000638627	0.000490146	CTTN/GRIK4/KCNA2/KCNA3/KCNA5/KCNH2/KCNJ3/KCNJ11/KCNK1/KCNQ3/SNAP25/ABCC8/NOS1AP/ABCC9/CNTNAP2/LRRC38/KCNE1B	17
CC	GO:0042383	sarcolemma	17/1188	136/19717	0.00336595	0.0206585	0.0158554	ANK1/ANK2/BGN/CACNA2D1/CAV1/COL6A3/KCNJ3/KCNJ11/RYR2/SGCD/STAC/ABCC8/VCAM1/NOS1AP/ABCC9/CACNG4/SNTG2	17
CC	GO:0044306	neuron projection terminus	17/1188	138/19717	0.00391689	0.0234536	0.0180006	ADRA2C/CDH8/CHRM3/EPHA4/GAD1/HTR1B/KCNA2/KCNA3/MME/NTRK2/ROR1/UCHL1/TSPOAP1/CPLX1/NMU/FLRT3/PACSIN1	17
CC	GO:0072562	blood microparticle	17/1188	147/19717	0.00739047	0.0398761	0.0306049	A2M/APOE/C1S/C4B/CD5L/CPN2/HBA1/HBA2/HBB/HBG2/KRT1/ORM1/PROS1/PRSS1/PZP/SLC4A1/TF	17
MF	GO:0005518	collagen binding	16/1117	67/17697	3.00611e-06	9.68894e-05	7.87431e-05	ACHE/DCN/LUM/MMP9/MMP13/DDR2/PDGFB/SPOCK1/SPARCL1/COL5A3/ADGRG6/ANTXR1/C1QTNF1/PODN/LRRC15/CCBE1	16
MF	GO:0015108	chloride transmembrane transporter activity	16/1117	100/17697	0.000505699	0.00823277	0.00669087	CLCA1/CLCN4/GABRA2/GABRB2/GABRB3/GABRD/GABRE/GABRG2/SLC1A1/SLC4A1/SLC6A2/SLC12A3/SLC22A3/CLIC5/ANO1/BEST3	16
MF	GO:0005179	hormone activity	16/1117	122/17697	0.00423114	0.0408163	0.0331719	CRH/EDN3/IGF2/INHBB/NPY/STC1/TSHB/STC2/KL/ADIPOQ/INSL5/UTS2/GAL/SPX/ERFE/UTS2B	16
MF	GO:0044325	ion channel binding	16/1117	124/17697	0.00496629	0.0452364	0.0367642	ANK1/ANK2/CAV1/CDH5/FGF12/FGF13/KCNJ11/RYR2/S100A10/STAC/ABCC8/ABCC9/TRDN/NEDD4L/LRRC38/KCNE1B	16
BP	GO:0086001	cardiac muscle cell action potential	16/1133	74/18670	7.25126e-06	0.000239839	0.000180501	ANK2/CACNA2D1/CAV1/DSP/FGF12/FGF13/GJA1/GJA5/KCNA5/KCNH2/KCNJ3/RYR2/NOS1AP/NEDD4L/CTNNA3/KCNE1B	16
BP	GO:0060411	cardiac septum morphogenesis	16/1133	76/18670	1.04113e-05	0.000307602	0.000231499	BMP4/BMP5/GJA5/ROBO1/ROBO2/SLIT3/TBX2/TBX3/TGFBR3/WNT5A/SLIT2/SEMA3C/ZFPM2/HEY1/HEY2/PARVA	16
BP	GO:0048332	mesoderm morphogenesis	16/1133	77/18670	1.24104e-05	0.000351645	0.000264646	BMP4/EPHA2/EYA2/FOXC1/HOXA11/SFRP2/TAL1/TBX3/WNT5A/HMGA2/ITGA8/CHRD/SIX2/DKK1/SOX17/WLS	16
BP	GO:0022617	extracellular matrix disassembly	16/1133	80/18670	2.06104e-05	0.000513698	0.000386606	A2M/FAP/KLKB1/MMP7/MMP8/MMP9/MMP13/MMP19/DDR2/PRSS1/PRSS2/HTRA1/TLL1/TLL2/ADAMTS4/PDPN	16
BP	GO:0032642	regulation of chemokine production	16/1133	82/18670	2.84596e-05	0.000647918	0.00048762	APOD/EPHA2/ACKR1/FFAR3/IFNG/IL7/IL10/LBP/SNAI2/TWIST1/WNT5A/ADIPOQ/POSTN/TSLP/IL33/MCOLN2	16
BP	GO:0032602	chemokine production	16/1133	89/18670	8.06721e-05	0.00144304	0.00108603	APOD/EPHA2/ACKR1/FFAR3/IFNG/IL7/IL10/LBP/SNAI2/TWIST1/WNT5A/ADIPOQ/POSTN/TSLP/IL33/MCOLN2	16
BP	GO:0014033	neural crest cell differentiation	16/1133	90/18670	9.26711e-05	0.00158748	0.00119473	BMP4/EDN3/EDNRA/ERBB4/FOXC1/FRZB/GDNF/PITX2/SFRP1/SNAI2/SOX9/TWIST1/SEMA3C/SEMA5B/SEMA6D/WNT10A	16
BP	GO:0015844	monoamine transport	16/1133	90/18670	9.26711e-05	0.00158748	0.00119473	ADRA2C/CNR1/CRH/GDNF/GHSR/FFAR3/HTR1B/HTR2A/KCNA2/MAOB/PRKN/RAB3B/CXCL12/SLC6A2/SLC22A3/SYT6	16
BP	GO:0034333	adherens junction assembly	16/1133	90/18670	9.26711e-05	0.00158748	0.00119473	APOD/COL16A1/CTTN/DMTN/EPHA3/KDR/PTK2/PTPRK/S100A10/SFRP1/THY1/RAMP2/CORO2B/LIMCH1/RHOD/PHLDB2	16
BP	GO:0071674	mononuclear cell migration	16/1133	90/18670	9.26711e-05	0.00158748	0.00119473	BMP5/C3AR1/FLT1/PDGFB/LGMN/CCL1/CCL8/CCL14/CCL16/CCL18/CCL23/XCL1/CX3CL1/CXCL12/XCL2/SLIT2	16
BP	GO:0033273	response to vitamin	16/1133	93/18670	0.000138537	0.00215552	0.00162223	ALPL/ARG1/ASCL1/COL1A1/EGFR/TNC/PHEX/PTN/SFRP1/SNAI2/STC1/TSHB/STC2/LRAT/POSTN/CYP26B1	16
BP	GO:0072080	nephron tubule development	16/1133	93/18670	0.000138537	0.00215552	0.00162223	BMP4/GDNF/HOXA11/HOXB7/PBX1/SIX1/SOX9/WNT7B/YAP1/SIX2/WWTR1/SIX4/LGR4/FAT4/IRX2/HES5	16
BP	GO:0007215	glutamate receptor signaling pathway	16/1133	100/18670	0.000328621	0.00425669	0.00320356	ANXA3/CRH/DLG3/GRIA3/GRID1/GRIK4/GRM8/IFNG/NEFL/RELN/CX3CL1/NLGN1/SHANK2/FRRS1L/CACNG4/SHISA7	16
BP	GO:2001023	regulation of response to drug	16/1133	100/18670	0.000328621	0.00425669	0.00320356	ARG1/CNR1/CRH/GDNF/GPR37/HTR1B/HTR2A/IL10/KCNA2/MET/PRKN/RAB3B/CXCL12/HMGA2/GAL/SYT6	16
BP	GO:0015837	amine transport	16/1133	102/18670	0.000413329	0.00504338	0.00379562	ADRA2C/ARG1/CNR1/CRH/GDNF/GHSR/FFAR3/HTR1B/HTR2A/KCNA2/PRKN/RAB3B/CXCL12/SLC6A1/RHCG/SYT6	16
BP	GO:0030593	neutrophil chemotaxis	16/1133	104/18670	0.000516171	0.00585031	0.00440291	C3AR1/EDN3/CXCR1/LBP/CXCL9/CCL1/CCL8/CCL14/CCL16/CCL18/CCL23/XCL1/CX3CL1/XCL2/SLIT2/IL36A	16
BP	GO:2001237	negative regulation of extrinsic apoptotic signaling pathway	16/1133	104/18670	0.000516171	0.00585031	0.00440291	FASLG/BMP4/BMP5/COL2A1/CTTN/EYA4/EYA2/GDNF/IL7/LMNA/CX3CL1/SFRP2/SNAI2/PRDX2/YAP1/PAK5	16
BP	GO:0071621	granulocyte chemotaxis	16/1133	123/18670	0.00313877	0.0231624	0.0174319	C3AR1/EDN3/CXCR1/LBP/CXCL9/CCL1/CCL8/CCL14/CCL16/CCL18/CCL23/XCL1/CX3CL1/XCL2/SLIT2/IL36A	16
BP	GO:0051209	release of sequestered calcium ion into cytosol	16/1133	124/18670	0.00340607	0.024404	0.0183663	APLNR/ANK2/FASLG/HTR2A/LCK/CXCL9/RYR2/XCL1/CX3CL1/THY1/TRPC1/TRPA1/TRDN/MCOLN3/JPH1/MCOLN2	16
BP	GO:0051283	negative regulation of sequestering of calcium ion	16/1133	126/18670	0.00399702	0.027622	0.0207881	APLNR/ANK2/FASLG/HTR2A/LCK/CXCL9/RYR2/XCL1/CX3CL1/THY1/TRPC1/TRPA1/TRDN/MCOLN3/JPH1/MCOLN2	16
BP	GO:0035270	endocrine system development	16/1133	127/18670	0.00432257	0.0296767	0.0223345	ASCL1/BMP4/BMP5/CDH1/CRH/GLI2/HOXA3/HOXA5/HOXB3/PBX1/PDGFRA/PITX2/SIX1/SOX9/THRB/WNT5A	16
BP	GO:0051282	regulation of sequestering of calcium ion	16/1133	128/18670	0.00466948	0.0311634	0.0234534	APLNR/ANK2/FASLG/HTR2A/LCK/CXCL9/RYR2/XCL1/CX3CL1/THY1/TRPC1/TRPA1/TRDN/MCOLN3/JPH1/MCOLN2	16
BP	GO:0051208	sequestering of calcium ion	16/1133	131/18670	0.00584866	0.0379879	0.0285895	APLNR/ANK2/FASLG/HTR2A/LCK/CXCL9/RYR2/XCL1/CX3CL1/THY1/TRPC1/TRPA1/TRDN/MCOLN3/JPH1/MCOLN2	16
BP	GO:0044344	cellular response to fibroblast growth factor stimulus	16/1133	143/18670	0.0131776	0.0712539	0.0536253	COL1A1/CPS1/CCN2/FGF9/FGF12/SFRP1/WNT5A/KL/POSTN/SULF1/FLRT3/FLRT2/ESRP1/SMOC2/FAT4/SHISA2	16
BP	GO:0006865	amino acid transport	16/1133	145/18670	0.0149	0.0772011	0.0581011	ARG1/NTRK2/SLC1A1/SLC1A7/SLC6A1/SLC6A8/SLC6A9/SNAP25/XK/PPFIA2/TSPOAP1/PDPN/CPLX1/SLC7A10/SLC7A3/SLC6A19	16
BP	GO:0042542	response to hydrogen peroxide	16/1133	146/18670	0.0158242	0.0807958	0.0608065	ARG1/COL1A1/GNAO1/GPR37/HBA1/HBA2/HBB/IL10/KCNA5/LCN2/MB/MET/SDC1/TRPC6/IL18RAP/TRPA1	16
BP	GO:0051250	negative regulation of lymphocyte activation	16/1133	146/18670	0.0158242	0.0807958	0.0608065	ARG1/CEACAM1/BMP4/CTLA4/LRRC32/IL2/IL10/XCL1/SFRP1/PRDX2/PGLYRP1/VSIG4/TNFRSF13B/GAL/PGLYRP4/TARM1	16
BP	GO:0014074	response to purine-containing compound	16/1133	149/18670	0.0188643	0.0921147	0.069325	ASS1/CDO1/COL1A1/CPS1/DMTN/IGFBP5/KCNJ11/MMP19/PCK1/PKLR/RYR2/SDC1/SLC6A1/STC1/TRPC3/ADIPOQ	16
CC	GO:0005796	Golgi lumen	16/1188	102/19717	0.000382825	0.00329767	0.00253096	BGN/DCN/DEFA3/GPC5/FMOD/LUM/MUC4/PDGFB/PRELP/PROS1/SDC1/SDC2/WNT5A/WNT7B/HS3ST1/GPC6	16
CC	GO:0044853	plasma membrane raft	16/1188	109/19717	0.000811256	0.0061281	0.00470331	ADD2/FASLG/CAV1/CD8A/CDH1/CDH15/HTR2A/KCNA5/MAL/MYO1D/PTGIS/NOS1AP/ASAH2/CD177/PLVAP/GASK1A	16
CC	GO:0043296	apical junction complex	16/1188	143/19717	0.0123946	0.0585167	0.0449115	CDH1/CDH5/DLG3/TJP1/MPDZ/MAGI1/PATJ/AMOTL2/EPB41L4B/POF1B/NECTIN4/EPPK1/PARD3B/FRMD6/FRMPD2/OCLN	16
MF	GO:0004497	monooxygenase activity	15/1117	99/17697	0.00132921	0.0162839	0.0132341	CYP2C18/CYP2J2/CYP11A1/FMO2/FMO3/CYP4F3/NOS2/PAH/PTGIS/TYRP1/CYP46A1/CYP39A1/CYP26B1/CYP4F12/NLRP11	15
MF	GO:0099094	ligand-gated cation channel activity	15/1117	105/17697	0.00241582	0.0266376	0.0216487	ASIC2/GRIA3/GRIK4/HTR3A/KCNH2/KCNJ3/KCNJ11/KCNJ15/KCNK1/RYR2/SCNN1B/TRPA1/MCOLN3/JPH1/MCOLN2	15
MF	GO:0005262	calcium channel activity	15/1117	123/17697	0.01064	0.0762078	0.061935	CACNA1E/CACNA2D1/CNR1/HTR1B/RYR2/TRPC1/TRPC3/TRPC6/CACNA1I/TRPA1/TSPOAP1/CACNG4/MCOLN3/JPH1/MCOLN2	15
MF	GO:0002020	protease binding	15/1117	128/17697	0.0150018	0.0989642	0.0804294	A2M/CD28/COL1A1/COL1A2/COL3A1/FAP/LCN2/PRKN/PZP/TIMP3/ADAMTS4/BCL2L10/CHL1/CD177/CCBE1	15
BP	GO:0086002	cardiac muscle cell action potential involved in contraction	15/1133	56/18670	7.8333e-07	4.24694e-05	3.19623e-05	ANK2/CACNA2D1/CAV1/DSP/FGF12/GJA1/GJA5/KCNA5/KCNH2/KCNJ3/RYR2/NOS1AP/NEDD4L/CTNNA3/KCNE1B	15
BP	GO:0061035	regulation of cartilage development	15/1133	72/18670	2.23074e-05	0.00055337	0.000416463	NKX3-2/BMP4/CCN2/EFEMP1/FRZB/GDF2/GLI2/HOXA11/SNAI2/SOX9/WNT5A/CCN4/SIX2/SOX6/PKDCC	15
BP	GO:1903524	positive regulation of blood circulation	15/1133	73/18670	2.65199e-05	0.00062153	0.00046776	ADRA2C/ADRB1/CAV1/CHRM3/CCN2/EDN3/EGFR/GJA1/GJA5/HTR2A/RYR2/SLC1A1/NOS1AP/NMU/HEY2	15
BP	GO:0001707	mesoderm formation	15/1133	75/18670	3.70974e-05	0.000789442	0.000594129	BMP4/EPHA2/EYA2/FOXC1/HOXA11/SFRP2/TAL1/WNT5A/HMGA2/ITGA8/CHRD/SIX2/DKK1/SOX17/WLS	15
BP	GO:0042310	vasoconstriction	15/1133	76/18670	4.36595e-05	0.000911133	0.000685713	ASIC2/ADRA2C/AGTR1/CAV1/CHRM3/EDN3/EDNRA/EGFR/GJA1/GJA5/HTR1B/HTR2A/KCNA5/KEL/ARHGAP42	15
BP	GO:0051937	catecholamine transport	15/1133	77/18670	5.12198e-05	0.00100886	0.00075926	ADRA2C/CNR1/CRH/GDNF/GHSR/FFAR3/HTR1B/HTR2A/KCNA2/PRKN/RAB3B/CXCL12/SLC6A2/SLC22A3/SYT6	15
BP	GO:0055072	iron ion homeostasis	15/1133	79/18670	6.98525e-05	0.00129807	0.000976921	ALAS2/EPAS1/EPB42/GDF2/LCN2/LTF/NEO1/RHAG/TF/ABCG2/HEPH/SLC22A17/ERFE/STEAP2/SCARA5	15
BP	GO:0007045	cell-substrate adherens junction assembly	15/1133	81/18670	9.41617e-05	0.00159359	0.00119933	APOD/COL16A1/CTTN/DMTN/EPHA3/KDR/PTK2/PTPRK/S100A10/SFRP1/THY1/CORO2B/LIMCH1/RHOD/PHLDB2	15
BP	GO:0048041	focal adhesion assembly	15/1133	81/18670	9.41617e-05	0.00159359	0.00119933	APOD/COL16A1/CTTN/DMTN/EPHA3/KDR/PTK2/PTPRK/S100A10/SFRP1/THY1/CORO2B/LIMCH1/RHOD/PHLDB2	15
BP	GO:0097756	negative regulation of blood vessel diameter	15/1133	84/18670	0.000144389	0.00221383	0.00166612	ASIC2/ADRA2C/AGTR1/CAV1/CHRM3/EDN3/EDNRA/EGFR/GJA1/GJA5/HTR1B/HTR2A/KCNA5/KEL/ARHGAP42	15
BP	GO:0060291	long-term synaptic potentiation	15/1133	86/18670	0.000189562	0.00273887	0.00206126	APOE/CALB2/CRH/EPHA4/MME/NFATC4/NTRK2/LGMN/RELN/PTN/SNAP25/CYP46A1/NLGN1/SHANK2/SHISA7	15
BP	GO:0061053	somite development	15/1133	89/18670	0.000280094	0.00377696	0.00284252	FOXC1/FRZB/MYF6/ROR2/PCDH8/SFRP1/SFRP2/SIX1/WNT5A/TBX18/SEMA3C/DLL3/DKK1/COBL/SIX4	15
BP	GO:0035249	synaptic transmission, glutamatergic	15/1133	93/18670	0.000456999	0.00542868	0.00408559	CDH8/CNR1/EGFR/GRID1/GRIK4/GRM8/HTR1B/HTR2A/ROR2/PRKN/RELN/NLGN1/SHANK2/DKK1/CACNG4	15
BP	GO:0070167	regulation of biomineral tissue development	15/1133	94/18670	0.000513828	0.00585031	0.00440291	BMP4/GJA1/LTF/MGP/DDR2/ENPP1/PTN/SOX9/TWIST1/KL/HEY1/HEY2/PKDCC/OSR2/TMEM119	15
BP	GO:0051952	regulation of amine transport	15/1133	95/18670	0.000576583	0.00642411	0.00483475	ADRA2C/ARG1/CNR1/CRH/GDNF/GHSR/FFAR3/HTR1B/HTR2A/KCNA2/PRKN/RAB3B/CXCL12/SLC6A1/SYT6	15
BP	GO:0007044	cell-substrate junction assembly	15/1133	97/18670	0.00072186	0.00759253	0.0057141	APOD/COL16A1/CTTN/DMTN/EPHA3/KDR/PTK2/PTPRK/S100A10/SFRP1/THY1/CORO2B/LIMCH1/RHOD/PHLDB2	15
BP	GO:0048709	oligodendrocyte differentiation	15/1133	97/18670	0.00072186	0.00759253	0.0057141	ASCL1/ID4/NTRK2/PTN/SOX9/OLIG2/WASF3/ZNF365/DAAM2/TENM4/TMEM98/SOX6/FA2H/IL34/HES5	15
BP	GO:0042472	inner ear morphogenesis	15/1133	98/18670	0.00080545	0.00819316	0.00616613	COL2A1/COL11A1/DLX5/FGF9/FRZB/GLI2/ROR2/PRRX1/SIX1/SOX9/CLRN1/WNT5A/ITGA8/SIX4/LRIG3	15
BP	GO:0099175	regulation of postsynapse organization	15/1133	98/18670	0.00080545	0.00819316	0.00616613	APOE/DGKB/EPHA4/EPHA7/GHSR/NTRK3/RELN/PTN/PTPRD/PTPRS/WNT5A/KALRN/NLGN1/LRFN2/SHISA7	15
BP	GO:0060840	artery development	15/1133	100/18670	0.000997421	0.00971378	0.00731053	APOB/APOE/BMP4/COL3A1/FOXC1/GJA5/PRRX1/ROBO1/ROBO2/SIX1/TBX2/HEY1/HEY2/ADAMTS9/ADGRF5	15
BP	GO:0007229	integrin-mediated signaling pathway	15/1133	103/18670	0.00135694	0.012325	0.00927572	CEACAM1/COL3A1/COL16A1/CCN2/DMTN/PRKD1/PTK2/PTN/THY1/ITGA8/ITGBL1/BCAR1/CD177/MPIG6B/FYB2	15
BP	GO:0019233	sensory perception of pain	15/1133	104/18670	0.00149865	0.0133357	0.0100364	ADRA2C/CNR1/EPHB1/HOXB8/HTR2A/IL10/KCNA2/MME/CXCL12/UCHL1/TRPA1/NMU/ANO1/TMEM100/SPX	15
BP	GO:0007009	plasma membrane organization	15/1133	105/18670	0.00165253	0.0144124	0.0108467	ABCD2/ANK2/CAV1/COL5A1/SLC4A1/SPTA1/EPB41L3/PACSIN1/A4GALT/PLSCR4/ANO3/FA2H/SH3TC2/FAT4/XKR6	15
BP	GO:0042136	neurotransmitter biosynthetic process	15/1133	106/18670	0.0018194	0.01566	0.0117856	ACHE/ASS1/CAV1/CHAT/GAD1/HBB/IFNG/IL10/MMP8/NOS2/PAH/PTGIS/RORA/NOS1AP/PRG3	15
BP	GO:0006821	chloride transport	15/1133	108/18670	0.00219544	0.0178728	0.013451	CLCA1/CLCN4/GABRA2/GABRB2/GABRB3/GABRD/GABRE/GABRG2/PRKG2/SLC1A1/SLC4A1/SLC12A3/CLIC5/ANO1/BEST3	15
BP	GO:0006024	glycosaminoglycan biosynthetic process	15/1133	110/18670	0.00263383	0.0203996	0.0153526	BGN/DCN/GPC5/FMOD/LUM/PDGFB/PRELP/SDC1/SDC2/NDST3/HS3ST1/GPC6/GALNT5/HS6ST2/CHSY3	15
BP	GO:0006023	aminoglycan biosynthetic process	15/1133	115/18670	0.00405349	0.0279388	0.0210266	BGN/DCN/GPC5/FMOD/LUM/PDGFB/PRELP/SDC1/SDC2/NDST3/HS3ST1/GPC6/GALNT5/HS6ST2/CHSY3	15
BP	GO:0046660	female sex differentiation	15/1133	115/18670	0.00405349	0.0279388	0.0210266	FOXC1/INHBB/MMP19/PDGFRA/PGR/ROBO2/SFRP1/SLIT3/TBX3/WNT5A/FZD4/SLIT2/PCYT1B/ZFPM2/CCDC182	15
BP	GO:0002687	positive regulation of leukocyte migration	15/1133	128/18670	0.0107942	0.0605833	0.0455947	C3AR1/EDN3/LBP/LGMN/PTN/CCL1/CCL8/XCL1/CXCL12/XCL2/THY1/VEGFC/WNT5A/CXCL14/PLVAP	15
BP	GO:0010595	positive regulation of endothelial cell migration	15/1133	128/18670	0.0107942	0.0605833	0.0455947	ANXA3/BMP4/KDR/MET/PDGFB/PRKD1/LGMN/VEGFC/WNT5A/PLPP3/BCAR1/SASH1/RHOJ/SMOC2/CCBE1	15
BP	GO:0060359	response to ammonium ion	15/1133	135/18670	0.0170057	0.0852554	0.0641627	ASS1/CHRM3/CNR1/CRH/GABRB2/GABRB3/GABRG2/GNAO1/HTR1B/HTR2A/HTR3A/PRKN/SLC6A1/CACNG4/SDK1	15
CC	GO:0044420	extracellular matrix component	15/1188	51/19717	1.87208e-07	4.37709e-06	3.35941e-06	COL1A1/COL1A2/COL2A1/COL3A1/COL4A1/COL4A2/COL5A1/COL8A1/COL11A1/COL12A1/COL15A1/FBLN1/TNC/LUM/COL5A3	15
CC	GO:0098839	postsynaptic density membrane	15/1188	74/19717	2.89902e-05	0.000364979	0.000280121	ADRA2C/CHRM3/DCC/DLG3/EPHA7/ERBB4/GRID1/PTPRS/PLPPR4/SORCS3/CACNG4/LRFN2/LRRC4C/LRRTM3/RGS7BP	15
CC	GO:0030175	filopodium	15/1188	104/19717	0.00139875	0.00953873	0.00732097	EPHA4/EPHB1/FAT1/FGF13/MAP2/MYO6/MYO10/VCAM1/UNC5C/PDPN/NLGN1/SYNE2/ENAH/TENM2/ANTXR1	15
CC	GO:0030665	clathrin-coated vesicle membrane	15/1188	115/19717	0.003799	0.0230285	0.0176744	APOB/APOE/CD3G/EGFR/GAD1/IL7R/MYO6/ROR2/TF/TYRP1/WNT5A/AP3B2/FZD4/RASSF9/CD207	15
CC	GO:0043679	axon terminus	15/1188	119/19717	0.00524964	0.0296273	0.0227389	ADRA2C/CDH8/CHRM3/EPHA4/GAD1/HTR1B/KCNA2/KCNA3/NTRK2/ROR1/TSPOAP1/CPLX1/NMU/FLRT3/PACSIN1	15
CC	GO:0030018	Z disc	15/1188	132/19717	0.0132747	0.0614894	0.0471931	ANK1/ANK2/FHL2/KCNA5/MYBPC2/MYH6/RYR2/SLC4A1/NOS1AP/SYNE2/PARVA/JPH1/TRIM63/MYO18B/MYZAP	15
MF	GO:0030594	neurotransmitter receptor activity	14/1117	117/17697	0.0155404	0.0989642	0.0804294	ADRB1/CHRM3/GABRA2/GABRB2/GABRB3/GABRD/GABRE/GABRG2/GRIA3/GRID1/GRIK4/HTR1B/HTR2A/HTR3A	14
BP	GO:0090183	regulation of kidney development	14/1133	56/18670	4.45227e-06	0.000162601	0.000122372	BMP4/GDNF/HOXB7/MMP9/PDGFB/SIX1/SOX9/ADIPOQ/YAP1/SIX2/WWTR1/SIX4/LGR4/FAT4	14
BP	GO:0060135	maternal process involved in female pregnancy	14/1133	64/18670	2.32814e-05	0.000574493	0.00043236	ARG1/CNR1/EPOR/GHSR/GJA1/GJB2/MMP7/PGR/PTGIS/PTN/STC1/NR2F2/STC2/KLF1	14
BP	GO:0002548	monocyte chemotaxis	14/1133	65/18670	2.80333e-05	0.000643787	0.00048451	FLT1/PDGFB/LGMN/CCL1/CCL8/CCL14/CCL16/CCL18/CCL23/XCL1/CX3CL1/CXCL12/XCL2/SLIT2	14
BP	GO:0006026	aminoglycan catabolic process	14/1133	65/18670	2.80333e-05	0.000643787	0.00048451	BGN/CHIT1/DCN/GPC5/FMOD/LUM/PRELP/SDC1/SDC2/PGLYRP1/GPC6/LYVE1/PGLYRP4/HPSE2	14
BP	GO:0010812	negative regulation of cell-substrate adhesion	14/1133	68/18670	4.77687e-05	0.000962512	0.000724381	APOD/COL1A1/DMTN/FBLN1/HOXA7/LGALS1/CX3CL1/SPOCK1/FZD4/CORO2B/POSTN/AJAP1/PHLDB2/NEXMIF	14
BP	GO:0061333	renal tubule morphogenesis	14/1133	78/18670	0.000225189	0.00315829	0.00237691	BMP4/COL4A1/GDNF/HOXA11/HOXB7/PBX1/SIX1/SOX9/SIX2/SIX4/LGR4/FAT4/IRX2/HES5	14
BP	GO:0110110	positive regulation of animal organ morphogenesis	14/1133	81/18670	0.000338517	0.00435271	0.00327583	BMP4/GDNF/HOXA11/HOXB7/PTN/ROBO1/ROBO2/SIX1/SOX9/TWIST1/SEMA3C/DKK1/SIX4/LGR4	14
BP	GO:0009798	axis specification	14/1133	85/18670	0.00056287	0.00628478	0.00472989	BMP4/HOXD8/PITX2/SFRP1/STC1/TBX3/WNT5A/SIX2/COBL/HEY2/VAX2/WLS/CXXC4/TDRD5	14
BP	GO:0014031	mesenchymal cell development	14/1133	85/18670	0.00056287	0.00628478	0.00472989	BMP4/EDN3/EDNRA/ERBB4/FOXC1/GDNF/PITX2/SNAI2/SOX9/TWIST1/SEMA3C/HEY2/SEMA5B/SEMA6D	14
BP	GO:1902476	chloride transmembrane transport	14/1133	88/18670	0.000804616	0.00819316	0.00616613	CLCA1/CLCN4/GABRA2/GABRB2/GABRB3/GABRD/GABRE/GABRG2/SLC1A1/SLC4A1/SLC12A3/CLIC5/ANO1/BEST3	14
BP	GO:0009953	dorsal/ventral pattern formation	14/1133	90/18670	0.00101028	0.00978465	0.00736387	ASCL1/BMP4/GLI2/FOXA1/HOXA11/HOXB2/LMX1B/SFRP1/SOX1/CHRD/VAX2/SOSTDC1/GREM2/CXXC4	14
BP	GO:0010717	regulation of epithelial to mesenchymal transition	14/1133	90/18670	0.00101028	0.00978465	0.00736387	BMP4/BMP5/COL1A1/EPHA3/FOXC1/FOXA1/SFRP1/SFRP2/TWIST1/OLFM1/PDPN/WWTR1/PHLDB2/DAB2IP	14
BP	GO:0042475	odontogenesis of dentin-containing tooth	14/1133	90/18670	0.00101028	0.00978465	0.00736387	BMP4/EDA/FOXC1/GLI2/GNAO1/TNC/PDGFRA/HTRA1/SOSTDC1/PERP/BCL11B/WNT10A/NKX2-3/RSPO2	14
BP	GO:0051899	membrane depolarization	14/1133	91/18670	0.00112864	0.0106946	0.00804872	ANK2/CACNA1E/CACNA2D1/CAV1/DCN/FGF12/GJA1/GJA5/KCNH2/KDR/SCN3A/CACNA1I/NEDD4L/CACNG4	14
BP	GO:0031341	regulation of cell killing	14/1133	98/18670	0.00232658	0.0188528	0.0141885	ARG1/CEACAM1/CD5L/CR1L/DNASE1L3/IFNG/IL7R/NOS2/XCL1/IL18RAP/PGLYRP1/PGLYRP4/ULBP2/IL23R	14
BP	GO:0043266	regulation of potassium ion transport	14/1133	105/18670	0.00442099	0.030234	0.022754	ANK2/ATP1B2/CAV1/EDN3/HTR2A/KCNA5/KCNH2/KEL/NOS1AP/NEDD4L/GAL/WNK2/LRRC38/KCNE1B	14
BP	GO:0006939	smooth muscle contraction	14/1133	110/18670	0.00669607	0.0418226	0.0314755	ADRA2C/CAV1/CHRM3/EDN3/EDNRA/CTTN/GDNF/GHSR/HTR2A/PRKG1/NMU/SULF1/SPX/ARHGAP42	14
BP	GO:0016101	diterpenoid metabolic process	14/1133	110/18670	0.00669607	0.0418226	0.0314755	ADH1C/ALDH1A1/APOB/APOE/CRH/CYP2C18/EGFR/GPC5/SDC1/SDC2/LRAT/GPC6/CYP26B1/GPIHBP1	14
BP	GO:0061387	regulation of extent of cell growth	14/1133	110/18670	0.00669607	0.0418226	0.0314755	APOE/DCC/CTTN/EPHA7/FGF13/MAP2/NTRK3/PTPRS/CXCL12/WNT5A/OLFM1/SEMA3C/SEMA5B/SEMA6D	14
BP	GO:0072676	lymphocyte migration	14/1133	111/18670	0.00724703	0.0438574	0.0330069	APOD/CCL1/CCL8/CCL14/CCL16/CCL18/CCL23/XCL1/CX3CL1/CXCL12/XCL2/WNT5A/CXCL14/PADI2	14
BP	GO:0098661	inorganic anion transmembrane transport	14/1133	111/18670	0.00724703	0.0438574	0.0330069	CLCA1/CLCN4/GABRA2/GABRB2/GABRB3/GABRD/GABRE/GABRG2/SLC1A1/SLC4A1/SLC12A3/CLIC5/ANO1/BEST3	14
BP	GO:0002065	columnar/cuboidal epithelial cell differentiation	14/1133	112/18670	0.00783344	0.0467075	0.0351518	ASCL1/NKX3-2/BMP4/BMP5/FOXA1/HOXA5/NPY/ROS1/CLRN1/WNT5A/HEY2/ESRP1/MCOLN3/HES5	14
BP	GO:0042303	molting cycle	14/1133	112/18670	0.00783344	0.0467075	0.0351518	EDA/EGFR/IGFBP5/SOX9/WNT5A/LDB2/FST/SOX21/DKK1/SOSTDC1/GAL/LGR4/FA2H/WNT10A	14
BP	GO:0042633	hair cycle	14/1133	112/18670	0.00783344	0.0467075	0.0351518	EDA/EGFR/IGFBP5/SOX9/WNT5A/LDB2/FST/SOX21/DKK1/SOSTDC1/GAL/LGR4/FA2H/WNT10A	14
BP	GO:0002688	regulation of leukocyte chemotaxis	14/1133	114/18670	0.00911883	0.0528149	0.0397482	C3AR1/EDN3/LBP/LGMN/PTN/CCL1/XCL1/CXCL12/XCL2/VEGFC/WNT5A/SLIT2/CXCL14/PADI2	14
BP	GO:0021782	glial cell development	14/1133	116/18670	0.0105648	0.0601304	0.0452538	ASCL1/EGFR/ID4/IFNG/NTRK2/NTRK3/ROR1/ROR2/WASF3/TENM4/ADGRG6/FA2H/SH3TC2/HES5	14
BP	GO:0007613	memory	14/1133	117/18670	0.0113521	0.0626449	0.0471462	APOE/CAMK4/CNR1/FGF13/HTR2A/NFATC4/LGMN/RELN/PTN/ITGA8/KALRN/SORCS3/PAK5/SHISA7	14
BP	GO:0006721	terpenoid metabolic process	14/1133	120/18670	0.0139903	0.0736484	0.0554274	ADH1C/ALDH1A1/APOB/APOE/CRH/CYP2C18/EGFR/GPC5/SDC1/SDC2/LRAT/GPC6/CYP26B1/GPIHBP1	14
BP	GO:0048675	axon extension	14/1133	121/18670	0.0149673	0.0774734	0.0583061	APOE/CTTN/MAP2/NTRK3/PTPRS/CXCL12/SLIT3/WNT5A/DCLK1/SLIT2/OLFM1/SEMA3C/SEMA5B/SEMA6D	14
BP	GO:0001838	embryonic epithelial tube formation	14/1133	124/18670	0.0182144	0.0899434	0.0676909	BMP4/BMP5/GDNF/SFRP1/SFRP2/SIX1/SOX9/TWIST1/WNT5A/COBL/SIX4/SALL4/IRX2/HES5	14
CC	GO:0099146	intrinsic component of postsynaptic density membrane	14/1188	53/19717	2.01644e-06	3.41404e-05	2.62027e-05	ADRA2C/CHRM3/DCC/EPHA7/ERBB4/GRID1/PTPRS/PLPPR4/SORCS3/CACNG4/LRFN2/LRRC4C/LRRTM3/RGS7BP	14
CC	GO:0044304	main axon	14/1188	68/19717	4.42833e-05	0.000530319	0.00040702	ANK1/ANK2/CRH/KCNA2/KCNJ11/KCNQ3/MAP2/MYO1D/ROBO2/SPOCK1/THY1/TUBB4A/EPB41L3/CNTNAP2	14
CC	GO:0030863	cortical cytoskeleton	14/1188	116/19717	0.00997331	0.0494636	0.0379632	CALB2/CALD1/CDH1/CTTN/EPB42/DMTN/NOS2/PVALB/SLC4A1/SPTA1/SPTB/PCLO/PLEKHH2/MYZAP	14
CC	GO:0070160	tight junction	14/1188	128/19717	0.0221325	0.0944964	0.0725259	CDH5/DLG3/EPHA2/TJP1/MPDZ/MAGI1/PATJ/AMOTL2/EPB41L4B/POF1B/EPPK1/PARD3B/FRMPD2/OCLN	14
KEGG	hsa05144	Malaria	14/528	50/8076	2.30047e-06	0.000220078	0.000200181	CD40LG/CR1L/ACKR1/GYPA/GYPB/HBA1/HBA2/HBB/IFNG/IL10/MET/SDC1/SDC2/VCAM1	14
KEGG	hsa04610	Complement and coagulation cascades	14/528	85/8076	0.00111904	0.0321164	0.0292128	A2M/C1S/C2/C3AR1/C4B/C7/CR1L/CR2/F5/F11/CFI/KLKB1/PROS1/VSIG4	14
KEGG	hsa04350	TGF-beta signaling pathway	14/528	94/8076	0.0029888	0.0536116	0.0487647	BMP4/BMP5/DCN/FMOD/ID3/ID4/IFNG/INHBB/NEO1/PITX2/CHRD/FST/GREM2/ACVR1C	14
MF	GO:0015370	solute:sodium symporter activity	13/1117	72/17697	0.000510864	0.00823277	0.00669087	SLC1A1/SLC6A1/SLC6A2/SLC6A8/SLC6A9/SLC10A2/SLC12A3/SLC22A3/SLC4A4/SLC17A2/SLC17A3/SLC5A12/SLC6A19	13
MF	GO:0043178	alcohol binding	13/1117	85/17697	0.00249447	0.0271476	0.0220631	APOD/APOE/CAV1/SULT2B1/TRPC1/TRPC3/TRPC6/LRAT/RPH3A/OSBP2/OSBPL6/RBP7/TSPO2	13
MF	GO:0005249	voltage-gated potassium channel activity	13/1117	87/17697	0.00307604	0.0326294	0.0265183	KCNA2/KCNA3/KCNA5/KCNH2/KCNJ3/KCNJ11/KCNJ15/KCNK1/KCNQ3/SNAP25/LRRC38/KCNT2/KCNE1B	13
MF	GO:0005496	steroid binding	13/1117	95/17697	0.00660001	0.0564368	0.0458669	APOD/APOE/CAV1/ESR2/ESRRG/PGR/RORA/SULT2B1/KL/OSBP2/OSBPL6/TSPO2/PAQR9	13
MF	GO:0015294	solute:cation symporter activity	13/1117	102/17697	0.0118131	0.083188	0.0676079	SLC1A1/SLC6A1/SLC6A2/SLC6A8/SLC6A9/SLC10A2/SLC12A3/SLC22A3/SLC4A4/SLC17A2/SLC17A3/SLC5A12/SLC6A19	13
BP	GO:0044331	cell-cell adhesion mediated by cadherin	13/1133	44/18670	1.25397e-06	5.84312e-05	4.3975e-05	CDH1/CDH5/CDH6/CDH8/CDH9/CDH10/CDH11/CDH15/FOXA1/WNT5A/ADAM19/CDH22/NEXMIF	13
BP	GO:0050919	negative chemotaxis	13/1133	46/18670	2.19401e-06	9.1574e-05	6.89181e-05	EPHA7/ROBO1/ROBO2/SLIT3/WNT5A/UNC5C/SLIT2/SEMA3C/NRG3/FLRT3/FLRT2/SEMA5B/SEMA6D	13
BP	GO:0016339	calcium-dependent cell-cell adhesion via plasma membrane cell adhesion molecules	13/1133	48/18670	3.71289e-06	0.000139472	0.000104966	CDH1/CDH5/CDH6/CDH8/CDH9/CDH10/CDH11/CDH15/NLGN1/PCDHB5/PCDHB6/PCDHB4/CDH22	13
BP	GO:0003179	heart valve morphogenesis	13/1133	52/18670	9.7401e-06	0.000292704	0.000220287	BMP4/GJA5/ROBO1/ROBO2/SLIT3/SNAI2/SOX9/TWIST1/SLIT2/OLFM1/HEY1/HEY2/ADAMTS9	13
BP	GO:0030195	negative regulation of blood coagulation	13/1133	53/18670	1.21946e-05	0.00034854	0.00026231	APOE/CEACAM1/F11/FAP/KLKB1/KRT1/PDGFB/PDGFRA/PRKG1/PROS1/TSPAN8/C1QTNF1/ADAMTS18	13
BP	GO:1900047	negative regulation of hemostasis	13/1133	54/18670	1.51766e-05	0.0004031	0.000303371	APOE/CEACAM1/F11/FAP/KLKB1/KRT1/PDGFB/PDGFRA/PRKG1/PROS1/TSPAN8/C1QTNF1/ADAMTS18	13
BP	GO:0050819	negative regulation of coagulation	13/1133	57/18670	2.82929e-05	0.000646922	0.00048687	APOE/CEACAM1/F11/FAP/KLKB1/KRT1/PDGFB/PDGFRA/PRKG1/PROS1/TSPAN8/C1QTNF1/ADAMTS18	13
BP	GO:0003170	heart valve development	13/1133	61/18670	6.05232e-05	0.00115742	0.00087107	BMP4/GJA5/ROBO1/ROBO2/SLIT3/SNAI2/SOX9/TWIST1/SLIT2/OLFM1/HEY1/HEY2/ADAMTS9	13
BP	GO:0006027	glycosaminoglycan catabolic process	13/1133	61/18670	6.05232e-05	0.00115742	0.00087107	BGN/DCN/GPC5/FMOD/LUM/PRELP/SDC1/SDC2/PGLYRP1/GPC6/LYVE1/PGLYRP4/HPSE2	13
BP	GO:0048645	animal organ formation	13/1133	61/18670	6.05232e-05	0.00115742	0.00087107	NKX3-2/BMP4/GDNF/GLI2/HOXA3/HOXA11/ROBO1/ROBO2/SIX1/WNT5A/DKK1/SULF1/SOX17	13
BP	GO:1900449	regulation of glutamate receptor signaling pathway	13/1133	64/18670	0.000102222	0.00167472	0.00126038	ANXA3/CRH/DLG3/GRIA3/IFNG/NEFL/RELN/CX3CL1/NLGN1/SHANK2/FRRS1L/CACNG4/SHISA7	13
BP	GO:0035924	cellular response to vascular endothelial growth factor stimulus	13/1133	68/18670	0.000194812	0.0027916	0.00210094	DCN/FOXC1/FLT1/KDR/PDGFRA/PRKD1/ROBO1/VCAM1/VEGFC/RAMP2/SMOC2/CCBE1/DAB2IP	13
BP	GO:0051965	positive regulation of synapse assembly	13/1133	68/18670	0.000194812	0.0027916	0.00210094	ASIC2/ADGRB3/EPHB1/NTRK2/NTRK3/PTPRD/NLGN1/FLRT3/FLRT2/SLITRK5/LRRN1/CBLN2/LRRTM3	13
BP	GO:0050771	negative regulation of axonogenesis	13/1133	69/18670	0.000226892	0.00315829	0.00237691	DCC/EPHA7/FGF13/MAP2/NGFR/PTK2/PTPRS/THY1/WNT5A/SLIT2/SEMA3C/SEMA5B/SEMA6D	13
BP	GO:0038034	signal transduction in absence of ligand	13/1133	72/18670	0.000351594	0.00446626	0.00336128	COL2A1/DCC/EYA4/EYA2/GDNF/IL2/IL7/LCN2/CX3CL1/SNAI2/PRDX2/SRPX/BCL2L10	13
BP	GO:0097192	extrinsic apoptotic signaling pathway in absence of ligand	13/1133	72/18670	0.000351594	0.00446626	0.00336128	COL2A1/DCC/EYA4/EYA2/GDNF/IL2/IL7/LCN2/CX3CL1/SNAI2/PRDX2/SRPX/BCL2L10	13
BP	GO:0072078	nephron tubule morphogenesis	13/1133	74/18670	0.00046376	0.00548071	0.00412475	BMP4/GDNF/HOXA11/HOXB7/PBX1/SIX1/SOX9/SIX2/SIX4/LGR4/FAT4/IRX2/HES5	13
BP	GO:1900006	positive regulation of dendrite development	13/1133	74/18670	0.00046376	0.00548071	0.00412475	APOE/BMP5/EPHA4/IL2/RELN/PTN/PTPRD/KALRN/NLGN1/SHANK2/COBL/PACSIN1/DAB2IP	13
BP	GO:0003281	ventricular septum development	13/1133	75/18670	0.000530357	0.00599817	0.00451419	BMP4/GJA5/ROBO1/ROBO2/SLIT3/TBX3/TGFBR3/WNT5A/SLIT2/ZFPM2/HEY1/HEY2/SALL4	13
BP	GO:0030500	regulation of bone mineralization	13/1133	76/18670	0.000604864	0.00662704	0.00498747	BMP4/GJA1/LTF/MGP/DDR2/ENPP1/PTN/SOX9/TWIST1/KL/PKDCC/OSR2/TMEM119	13
BP	GO:0048844	artery morphogenesis	13/1133	76/18670	0.000604864	0.00662704	0.00498747	APOB/APOE/BMP4/COL3A1/FOXC1/GJA5/PRRX1/SIX1/TBX2/HEY1/HEY2/ADAMTS9/ADGRF5	13
BP	GO:0072088	nephron epithelium morphogenesis	13/1133	76/18670	0.000604864	0.00662704	0.00498747	BMP4/GDNF/HOXA11/HOXB7/PBX1/SIX1/SOX9/SIX2/SIX4/LGR4/FAT4/IRX2/HES5	13
BP	GO:0072028	nephron morphogenesis	13/1133	78/18670	0.000780576	0.00810666	0.00610103	BMP4/GDNF/HOXA11/HOXB7/PBX1/SIX1/SOX9/SIX2/SIX4/LGR4/FAT4/IRX2/HES5	13
BP	GO:0014032	neural crest cell development	13/1133	81/18670	0.00112324	0.0106626	0.00802465	BMP4/EDN3/EDNRA/ERBB4/FOXC1/GDNF/PITX2/SNAI2/SOX9/TWIST1/SEMA3C/SEMA5B/SEMA6D	13
BP	GO:0034109	homotypic cell-cell adhesion	13/1133	81/18670	0.00112324	0.0106626	0.00802465	CEACAM1/DSP/DMTN/HBB/LGALS1/PDGFRA/PRKG1/PLPP3/PDPN/CTNNA3/C1QTNF1/CCM2L/ADAMTS18	13
BP	GO:0060415	muscle tissue morphogenesis	13/1133	82/18670	0.00126218	0.0116452	0.00876414	COL3A1/COL11A1/DSP/FOXC1/MYBPC2/MYF6/MYH6/RYR2/TGFBR3/WNT5A/ZFPM2/HEY2/CCM2L	13
BP	GO:0045445	myoblast differentiation	13/1133	84/18670	0.00158315	0.0138971	0.0104589	BMP4/EPAS1/ID3/IGFBP3/LGALS1/CXCL9/MYF6/SDC1/SOX9/TBX2/TBX3/CXCL14/SOSTDC1	13
BP	GO:0048864	stem cell development	13/1133	85/18670	0.00176737	0.0153123	0.011524	BMP4/EDN3/EDNRA/ERBB4/FOXC1/GDNF/PITX2/SNAI2/SOX9/TWIST1/SEMA3C/SEMA5B/SEMA6D	13
BP	GO:0001942	hair follicle development	13/1133	86/18670	0.00196894	0.0167823	0.0126303	EDA/EGFR/IGFBP5/SOX9/WNT5A/LDB2/FST/SOX21/DKK1/SOSTDC1/GAL/LGR4/WNT10A	13
BP	GO:0070542	response to fatty acid	13/1133	86/18670	0.00196894	0.0167823	0.0126303	APOB/ASS1/CPS1/CCN2/FFAR3/TNC/ID3/NFATC4/PRKAA2/SFRP1/TGFBR3/ADIPOQ/PID1	13
BP	GO:0014068	positive regulation of phosphatidylinositol 3-kinase signaling	13/1133	87/18670	0.00218909	0.0178487	0.0134328	CD28/DCN/EPOR/ERBB4/FLT1/KDR/NTRK2/NTRK3/PDGFB/PDGFRA/RELN/PTK2/SOX9	13
BP	GO:0022404	molting cycle process	13/1133	88/18670	0.00242906	0.0193552	0.0145666	EDA/EGFR/IGFBP5/SOX9/WNT5A/LDB2/FST/SOX21/DKK1/SOSTDC1/GAL/LGR4/WNT10A	13
BP	GO:0022405	hair cycle process	13/1133	88/18670	0.00242906	0.0193552	0.0145666	EDA/EGFR/IGFBP5/SOX9/WNT5A/LDB2/FST/SOX21/DKK1/SOSTDC1/GAL/LGR4/WNT10A	13
BP	GO:0048644	muscle organ morphogenesis	13/1133	88/18670	0.00242906	0.0193552	0.0145666	COL3A1/COL11A1/DSP/FOXC1/MYBPC2/MYF6/MYH6/RYR2/TGFBR3/WNT5A/ZFPM2/HEY2/CCM2L	13
BP	GO:0098773	skin epidermis development	13/1133	88/18670	0.00242906	0.0193552	0.0145666	EDA/EGFR/IGFBP5/SOX9/WNT5A/LDB2/FST/SOX21/DKK1/SOSTDC1/GAL/LGR4/WNT10A	13
BP	GO:0045778	positive regulation of ossification	13/1133	90/18670	0.0029738	0.0223964	0.0168554	BMP4/LTF/DDR2/PRKD1/PTN/SFRP2/WNT5A/WNT7B/CCN4/KL/PKDCC/OSR2/TMEM119	13
BP	GO:0008585	female gonad development	13/1133	96/18670	0.00522988	0.0344661	0.025939	FOXC1/INHBB/MMP19/PDGFRA/PGR/ROBO2/SFRP1/SLIT3/FZD4/SLIT2/PCYT1B/ZFPM2/CCDC182	13
BP	GO:0048010	vascular endothelial growth factor receptor signaling pathway	13/1133	96/18670	0.00522988	0.0344661	0.025939	FGF9/FOXC1/FLT1/KDR/PRKD1/PTK2/VEGFC/FZD4/BCAR1/NCKAP1/SULF1/MMRN2/DAB2IP	13
BP	GO:0060191	regulation of lipase activity	13/1133	98/18670	0.00623073	0.0391486	0.029463	AGTR1/APOC1/EDNRA/EGFR/FLT1/HTR2A/ITK/NTRK2/NTRK3/PDGFRA/SORT1/PLA2R1/GPIHBP1	13
BP	GO:0046545	development of primary female sexual characteristics	13/1133	101/18670	0.00801153	0.0476614	0.0358697	FOXC1/INHBB/MMP19/PDGFRA/PGR/ROBO2/SFRP1/SLIT3/FZD4/SLIT2/PCYT1B/ZFPM2/CCDC182	13
BP	GO:0018958	phenol-containing compound metabolic process	13/1133	103/18670	0.00940593	0.0542984	0.0408646	CRYM/EPAS1/GPR37/MAOA/MAOB/NPR1/PAH/PRKN/TRPC1/TYRP1/WNT5A/GCNT4/RNF180	13
BP	GO:0014812	muscle cell migration	13/1133	104/18670	0.0101708	0.0580763	0.0437079	FGF9/IGFBP3/IGFBP5/PDGFB/PRKG1/SIX1/CCN4/SLIT2/ADIPOQ/POSTN/SIX4/PARVA/SEMA6D	13
BP	GO:0046916	cellular transition metal ion homeostasis	13/1133	108/18670	0.0137253	0.0723259	0.0544321	ALAS2/GDF2/LCK/LCN2/LTF/TF/SLC30A4/ABCG2/HEPH/SLC22A17/ERFE/SLC30A8/SCARA5	13
BP	GO:0001938	positive regulation of endothelial cell proliferation	13/1133	112/18670	0.0181632	0.0897747	0.067564	AGTR1/APLNR/ARG1/BMP4/GDF2/GHSR/IL10/KDR/PDGFB/PRKD1/CXCL12/VEGFC/WNT5A	13
BP	GO:1903828	negative regulation of cellular protein localization	13/1133	112/18670	0.0181632	0.0897747	0.067564	APOD/DMTN/PKIA/DCLK1/ADIPOQ/NEDD4L/TMEM98/PID1/TP53INP2/PKDCC/LRRC15/SIAH3/USP17L2	13
CC	GO:0099061	integral component of postsynaptic density membrane	13/1188	50/19717	5.65224e-06	8.67265e-05	6.65625e-05	ADRA2C/CHRM3/DCC/EPHA7/ERBB4/GRID1/PTPRS/PLPPR4/SORCS3/CACNG4/LRFN2/LRRC4C/LRRTM3	13
CC	GO:0032589	neuron projection membrane	13/1188	57/19717	2.63016e-05	0.000339845	0.000260831	ANK1/GABRA2/GABRE/GABRG2/KCNJ11/MYO1D/ROBO2/THY1/ITGA8/EPB41L3/CNTNAP2/WLS/SHISA7	13
CC	GO:0098685	Schaffer collateral - CA1 synapse	13/1188	82/19717	0.00118461	0.00819214	0.00628746	ADRB1/CDH11/DGKB/DCC/EPHA4/EPHA7/GHSR/NEFL/PTPRS/AKAP12/CPLX1/LRFN2/LRRC4C	13
CC	GO:0008076	voltage-gated potassium channel complex	13/1188	87/19717	0.00205843	0.013658	0.0104825	CTTN/KCNA2/KCNA3/KCNA5/KCNH2/KCNJ3/KCNK1/KCNQ3/SNAP25/NOS1AP/CNTNAP2/LRRC38/KCNE1B	13
CC	GO:0043202	lysosomal lumen	13/1188	95/19717	0.00450836	0.0257396	0.0197551	APOB/FASLG/BGN/DCN/GPC5/FMOD/LUM/PRELP/LGMN/SDC1/SDC2/TCN2/GPC6	13
MF	GO:0017147	Wnt-protein binding	12/1117	37/17697	1.5964e-06	6.37041e-05	5.17731e-05	FRZB/MET/MST1R/ROR1/ROR2/SFRP1/SFRP2/FZD4/WIF1/WLS/TRABD2A/TRABD2B	12
MF	GO:0008009	chemokine activity	12/1117	49/17697	3.92923e-05	0.000997787	0.000810913	CXCL9/CCL1/CCL8/CCL14/CCL16/CCL18/CCL23/XCL1/CX3CL1/CXCL12/XCL2/CXCL14	12
MF	GO:0050840	extracellular matrix binding	12/1117	57/17697	0.000188671	0.00367688	0.00298825	ACHE/BGN/COL11A1/DCN/LGALS1/SPOCK1/SPARCL1/SLIT2/ADGRG6/SMOC1/LRRC15/CLEC14A	12
MF	GO:0042379	chemokine receptor binding	12/1117	66/17697	0.000777524	0.011431	0.00929008	CXCL9/CCL1/CCL8/CCL14/CCL16/CCL18/CCL23/XCL1/CX3CL1/CXCL12/XCL2/CXCL14	12
MF	GO:0033613	activating transcription factor binding	12/1117	85/17697	0.00693104	0.0571717	0.0464641	HOXA4/HOXB4/IFI27/PITX2/TBX2/TBX3/LDB2/TBX18/YAP1/HEY2/PRDM16/DUSP26	12
MF	GO:0030165	PDZ domain binding	12/1117	86/17697	0.00760534	0.0595633	0.0484078	ADRB1/DLG3/GJA1/PRKN/SDC2/TGFBR3/FZD4/ARHGAP29/NLGN1/SNTG2/GNG12/CXXC4	12
MF	GO:0005253	anion channel activity	12/1117	89/17697	0.00994039	0.0724352	0.0588689	CLCA1/CLCN4/GABRA2/GABRB2/GABRB3/GABRD/GABRE/GABRG2/SLC17A3/CLIC5/ANO1/BEST3	12
BP	GO:0010463	mesenchymal cell proliferation	12/1133	44/18670	8.09965e-06	0.000252714	0.000190191	BMP4/FGF9/LMNA/NFIB/PRRX1/PTN/SIX1/SOX9/WNT5A/CHRD/SIX2/FAT4	12
BP	GO:0060412	ventricular septum morphogenesis	12/1133	44/18670	8.09965e-06	0.000252714	0.000190191	BMP4/GJA5/ROBO1/ROBO2/SLIT3/TBX3/TGFBR3/WNT5A/SLIT2/ZFPM2/HEY1/HEY2	12
BP	GO:0007157	heterophilic cell-cell adhesion via plasma membrane cell adhesion molecules	12/1133	46/18670	1.33492e-05	0.000365643	0.000275181	CD6/CEACAM8/PTPRD/VCAM1/NLGN1/TENM4/TENM2/CADM3/FAT4/NECTIN4/HMCN1/IGSF21	12
BP	GO:0060443	mammary gland morphogenesis	12/1133	46/18670	1.33492e-05	0.000365643	0.000275181	ARG1/BMP4/CAV1/EPHA2/GLI2/IGFBP5/PGR/TBX2/TBX3/WNT5A/NRG3/SOSTDC1	12
BP	GO:0099172	presynapse organization	12/1133	46/18670	1.33492e-05	0.000365643	0.000275181	NTRK3/PTPRD/WNT5A/PPFIA2/NLGN4Y/NLGN1/DKK1/PCDH17/CNTN5/NLGN4X/CBLN2/LRRTM3	12
BP	GO:0060351	cartilage development involved in endochondral bone morphogenesis	12/1133	47/18670	1.69437e-05	0.000436254	0.000328323	COL1A1/COL2A1/COL6A3/COL12A1/HOXA11/MATN3/MMP13/VIT/SOX9/STC1/COL21A1/VWA2	12
BP	GO:0086009	membrane repolarization	12/1133	50/18670	3.3247e-05	0.000725622	0.000546099	ANK2/ATP1B2/CACNA2D1/CAV1/GJA1/GJA5/KCNA5/KCNH2/KCNJ3/NOS1AP/NEDD4L/KCNE1B	12
BP	GO:0032330	regulation of chondrocyte differentiation	12/1133	52/18670	5.05054e-05	0.00100229	0.000754321	NKX3-2/BMP4/CCN2/EFEMP1/GLI2/HOXA11/SNAI2/SOX9/CCN4/SIX2/SOX6/PKDCC	12
BP	GO:0072132	mesenchyme morphogenesis	12/1133	52/18670	5.05054e-05	0.00100229	0.000754321	BMP5/FOXC1/ROBO1/ROBO2/SNAI2/SOX9/TBX2/TWIST1/WNT5A/HEY1/HEY2/TMEM100	12
BP	GO:0060688	regulation of morphogenesis of a branching structure	12/1133	56/18670	0.000109146	0.00176614	0.00132919	BMP4/GDNF/HOXB7/SFRP1/SIX1/SNAI2/SOX9/WNT5A/SIX2/SULF1/SIX4/LGR4	12
BP	GO:0086065	cell communication involved in cardiac conduction	12/1133	56/18670	0.000109146	0.00176614	0.00132919	ANK2/ATP1B2/CACNA2D1/CAV1/DSP/GJA1/GJA5/KCNA5/KCNJ3/RYR2/TRDN/CTNNA3	12
BP	GO:0019229	regulation of vasoconstriction	12/1133	58/18670	0.000155814	0.00237514	0.00178752	ASIC2/ADRA2C/AGTR1/CAV1/CHRM3/EDN3/EGFR/GJA1/GJA5/HTR2A/KCNA5/ARHGAP42	12
BP	GO:0051893	regulation of focal adhesion assembly	12/1133	60/18670	0.000218566	0.0030816	0.0023192	APOD/COL16A1/DMTN/EPHA3/KDR/PTK2/S100A10/SFRP1/THY1/LIMCH1/RHOD/PHLDB2	12
BP	GO:0090109	regulation of cell-substrate junction assembly	12/1133	60/18670	0.000218566	0.0030816	0.0023192	APOD/COL16A1/DMTN/EPHA3/KDR/PTK2/S100A10/SFRP1/THY1/LIMCH1/RHOD/PHLDB2	12
BP	GO:0042733	embryonic digit morphogenesis	12/1133	61/18670	0.00025727	0.0035234	0.00265169	BMP4/GJA1/GLI2/HOXA11/ROR2/SFRP2/TBX2/TBX3/TWIST1/WNT5A/OSR2/FREM2	12
BP	GO:0050433	regulation of catecholamine secretion	12/1133	62/18670	0.000301645	0.00399585	0.00300725	ADRA2C/CNR1/CRH/GDNF/GHSR/FFAR3/HTR1B/HTR2A/KCNA2/PRKN/CXCL12/SYT6	12
BP	GO:0048247	lymphocyte chemotaxis	12/1133	64/18670	0.000410061	0.00502683	0.00378317	CCL1/CCL8/CCL14/CCL16/CCL18/CCL23/XCL1/CX3CL1/XCL2/WNT5A/CXCL14/PADI2	12
BP	GO:0050432	catecholamine secretion	12/1133	64/18670	0.000410061	0.00502683	0.00378317	ADRA2C/CNR1/CRH/GDNF/GHSR/FFAR3/HTR1B/HTR2A/KCNA2/PRKN/CXCL12/SYT6	12
BP	GO:0048663	neuron fate commitment	12/1133	65/18670	0.000475561	0.00560757	0.00422023	ASCL1/BMP4/GLI2/FOXA1/NTRK3/PRRX1/SIX1/SOX1/OLIG2/MYT1L/ESRP1/BCL11B	12
BP	GO:1903391	regulation of adherens junction organization	12/1133	67/18670	0.000633207	0.00686904	0.0051696	APOD/COL16A1/DMTN/EPHA3/KDR/PTK2/S100A10/SFRP1/THY1/LIMCH1/RHOD/PHLDB2	12
BP	GO:0071300	cellular response to retinoic acid	12/1133	69/18670	0.000832465	0.00845161	0.00636064	COL1A1/EPHA3/TNC/NTRK3/PCK1/RORB/SOX9/WNT5A/WNT7B/FZD4/YAP1/CYP26B1	12
BP	GO:0001756	somitogenesis	12/1133	70/18670	0.000950206	0.00932301	0.00701644	FOXC1/MYF6/ROR2/PCDH8/SFRP1/SFRP2/WNT5A/TBX18/SEMA3C/DLL3/DKK1/COBL	12
BP	GO:2001259	positive regulation of cation channel activity	12/1133	70/18670	0.000950206	0.00932301	0.00701644	ANK2/CACNA2D1/FGF14/IFNG/KCNJ11/RELN/STAC/NOS1AP/TRDN/CACNG4/GAL/LRRC38	12
BP	GO:0050795	regulation of behavior	12/1133	71/18670	0.00108148	0.0103409	0.00778251	APOE/CNR1/CRH/GHSR/GJA1/HTR1B/KCNA2/MC4R/RELN/INSL5/NMU/NLGN1	12
BP	GO:1904427	positive regulation of calcium ion transmembrane transport	12/1133	71/18670	0.00108148	0.0103409	0.00778251	APLNR/ANK2/CACNA2D1/FGF14/CXCL9/RYR2/XCL1/CX3CL1/STAC/THY1/TRPC1/TRDN	12
BP	GO:0003208	cardiac ventricle morphogenesis	12/1133	73/18670	0.00138937	0.0125761	0.00946469	COL11A1/DSP/FOXC1/MYH6/RYR2/SFRP2/TGFBR3/SEMA3C/ZFPM2/HEY1/HEY2/CCM2L	12
BP	GO:0007492	endoderm development	12/1133	76/18670	0.00198403	0.0168835	0.0127064	BMP4/COL4A2/COL5A1/COL8A1/COL11A1/COL12A1/MMP8/MMP9/PAX9/HMGA2/DKK1/SOX17	12
BP	GO:0021675	nerve development	12/1133	79/18670	0.00277257	0.0212241	0.0159731	EPHB1/GABRB2/GABRB3/HOXA3/HOXB2/HOXB3/KCNA2/SIX1/VCAM1/SULF1/SIX4/NAV2	12
BP	GO:0014855	striated muscle cell proliferation	12/1133	81/18670	0.00342718	0.0245218	0.018455	EPHB1/ERBB4/FGF9/FOXC1/GJA1/SIX1/TBX2/TGFBR3/YAP1/ZFPM2/HEY2/TENM4	12
BP	GO:0050886	endocrine process	12/1133	84/18670	0.00463745	0.031028	0.0233515	AGTR1/CRH/EDN3/ENPEP/GJA5/INHBB/MME/TBX3/FZD4/GAL/C1QTNF1/SELENOM	12
BP	GO:0048013	ephrin receptor signaling pathway	12/1133	86/18670	0.00561848	0.0366595	0.0275898	EPHA2/EPHA3/EPHA4/EPHA7/EPHB1/MMP9/NTRK3/PTK2/SDC2/KALRN/ARHGEF28/EPHA10	12
BP	GO:0001892	embryonic placenta development	12/1133	87/18670	0.00616718	0.0390671	0.0294017	BMP5/EGFR/EPAS1/IGF2/IL10/PDGFB/NR2F2/PHLDA2/WNT7B/HEY1/HEY2/RSPO3	12
BP	GO:0002690	positive regulation of leukocyte chemotaxis	12/1133	87/18670	0.00616718	0.0390671	0.0294017	C3AR1/EDN3/LBP/LGMN/PTN/CCL1/XCL1/CXCL12/XCL2/VEGFC/WNT5A/CXCL14	12
BP	GO:0045844	positive regulation of striated muscle tissue development	12/1133	87/18670	0.00616718	0.0390671	0.0294017	BMP4/ERBB4/FGF9/GJA1/MYF6/TBX2/TGFBR3/YAP1/ZFPM2/HEY2/CYP26B1/SOX17	12
BP	GO:0048636	positive regulation of muscle organ development	12/1133	87/18670	0.00616718	0.0390671	0.0294017	BMP4/ERBB4/FGF9/GJA1/MYF6/TBX2/TGFBR3/YAP1/ZFPM2/HEY2/CYP26B1/SOX17	12
BP	GO:1901863	positive regulation of muscle tissue development	12/1133	88/18670	0.00675741	0.0421057	0.0316885	BMP4/ERBB4/FGF9/GJA1/MYF6/TBX2/TGFBR3/YAP1/ZFPM2/HEY2/CYP26B1/SOX17	12
BP	GO:1901379	regulation of potassium ion transmembrane transport	12/1133	90/18670	0.00807088	0.0479602	0.0360946	ANK2/ATP1B2/CAV1/EDN3/KCNH2/KEL/NOS1AP/NEDD4L/GAL/WNK2/LRRC38/KCNE1B	12
BP	GO:0006029	proteoglycan metabolic process	12/1133	94/18670	0.0112905	0.0625414	0.0470683	BGN/COL2A1/COL11A1/DCN/FOXL1/NDST3/HS3ST1/SULF1/NDNF/HS6ST2/EGFLAM/CHSY3	12
BP	GO:0032231	regulation of actin filament bundle assembly	12/1133	97/18670	0.0142935	0.0745728	0.0561231	CCN2/MET/PRKN/S100A10/CX3CL1/SFRP1/CORO2B/ARHGEF15/LIMCH1/ASAP3/ARHGAP28/PHLDB2	12
BP	GO:0051591	response to cAMP	12/1133	97/18670	0.0142935	0.0745728	0.0561231	ASS1/CDO1/COL1A1/CPS1/DMTN/IGFBP5/MMP19/PCK1/PKLR/SDC1/STC1/ADIPOQ	12
BP	GO:0034446	substrate adhesion-dependent cell spreading	12/1133	100/18670	0.0178681	0.0884823	0.0665913	DMTN/FBLN1/PTK2/S100A10/FZD4/ITGA8/OLFM4/PDPN/POSTN/PARVA/ANTXR1/EGFLAM	12
BP	GO:0010522	regulation of calcium ion transport into cytosol	12/1133	102/18670	0.0205984	0.0981223	0.0738463	APLNR/ANK2/CAV1/CXCL9/RYR2/XCL1/CX3CL1/THY1/TRPC1/TRPC3/TRDN/JPH1	12
BP	GO:0030148	sphingolipid biosynthetic process	12/1133	102/18670	0.0205984	0.0981223	0.0738463	PRKD1/UGT8/PLPP3/LARGE1/ST8SIA5/A4GALT/ELOVL2/ASAH2/FA2H/ST6GALNAC5/SPTSSB/ASAH2B	12
BP	GO:0035335	peptidyl-tyrosine dephosphorylation	12/1133	102/18670	0.0205984	0.0981223	0.0738463	EYA4/EYA2/PTPRB/PTPRD/PTPRG/PTPRK/PTPRS/CDC14B/DUSP13/DUSP21/DUSP26/PTPRQ	12
CC	GO:0098982	GABA-ergic synapse	12/1188	71/19717	0.00101788	0.00734969	0.00564088	CDH10/CNR1/ERBB4/GABRB2/GABRB3/GABRD/GABRG2/SLC6A1/NLGN4Y/PCDH17/CNTN5/NLGN4X	12
MF	GO:0043394	proteoglycan binding	11/1117	36/17697	8.36682e-06	0.000250407	0.000203509	APOE/COL2A1/COL5A1/TNC/PTN/PTPRS/CHRD/SLIT2/FST/COL5A3/HPSE2	11
MF	GO:0005254	chloride channel activity	11/1117	75/17697	0.00716351	0.0571717	0.0464641	CLCA1/CLCN4/GABRA2/GABRB2/GABRB3/GABRD/GABRE/GABRG2/CLIC5/ANO1/BEST3	11
BP	GO:0060536	cartilage morphogenesis	11/1133	29/18670	4.913e-07	2.90309e-05	2.18485e-05	COL6A3/COL12A1/HOXA5/MATN3/VIT/SNAI2/STC1/WNT7B/COL21A1/RSPO2/VWA2	11
BP	GO:1905314	semi-lunar valve development	11/1133	37/18670	7.74449e-06	0.000248343	0.000186902	BMP4/GJA5/ROBO1/ROBO2/SLIT3/SNAI2/SOX9/TWIST1/SLIT2/HEY1/HEY2	11
BP	GO:0086005	ventricular cardiac muscle cell action potential	11/1133	38/18670	1.03051e-05	0.000306185	0.000230433	ANK2/CAV1/DSP/GJA5/KCNH2/KCNJ3/RYR2/NOS1AP/NEDD4L/CTNNA3/KCNE1B	11
BP	GO:0099054	presynapse assembly	11/1133	43/18670	3.72279e-05	0.000789442	0.000594129	NTRK3/PTPRD/WNT5A/NLGN4Y/NLGN1/DKK1/PCDH17/CNTN5/NLGN4X/CBLN2/LRRTM3	11
BP	GO:0003197	endocardial cushion development	11/1133	44/18670	4.69373e-05	0.000956757	0.00072005	BMP4/BMP5/ROBO1/ROBO2/SNAI2/SOX9/TBX2/TWIST1/HEY1/HEY2/TMEM100	11
BP	GO:0038084	vascular endothelial growth factor signaling pathway	11/1133	44/18670	4.69373e-05	0.000956757	0.00072005	DCN/FOXC1/FLT1/KDR/PDGFRA/PRKD1/ROBO1/VEGFC/SMOC2/CCBE1/DAB2IP	11
BP	GO:0030574	collagen catabolic process	11/1133	47/18670	9.01452e-05	0.00156978	0.00118141	COL15A1/COL19A1/FAP/MMP7/MMP8/MMP9/MMP13/MMP19/PRSS2/ADAMTS2/MMP27	11
BP	GO:0035272	exocrine system development	11/1133	48/18670	0.000110597	0.00178414	0.00134273	EDA/EGFR/FOXC1/IGSF3/IGF2/NFIB/SNAI2/SOX9/SEMA3C/TFCP2L1/WLS	11
BP	GO:0045599	negative regulation of fat cell differentiation	11/1133	51/18670	0.000197208	0.00281062	0.00211526	RUNX1T1/ID4/ENPP1/RORA/SORT1/WNT5A/CCN4/ADIPOQ/ZFPM2/WWTR1/TRIB2	11
BP	GO:0090102	cochlea development	11/1133	51/18670	0.000197208	0.00281062	0.00211526	EPHA4/FRZB/GABRB2/GABRB3/GLI2/NTRK3/PVALB/SIX1/SOX9/WNT5A/HEY2	11
BP	GO:0015872	dopamine transport	11/1133	52/18670	0.000236568	0.00326538	0.00245751	CNR1/GDNF/HTR1B/HTR2A/KCNA2/PRKN/RAB3B/CXCL12/SLC6A2/SLC22A3/SYT6	11
BP	GO:0055078	sodium ion homeostasis	11/1133	52/18670	0.000236568	0.00326538	0.00245751	AGTR1/ATP1A4/ATP1B2/C7/NPR1/SCNN1B/SLC12A3/NEDD4L/TMPRSS3/CYP4F12/SPX	11
BP	GO:0021879	forebrain neuron differentiation	11/1133	53/18670	0.000282362	0.00378811	0.00285091	ASCL1/DLX5/ERBB4/ROBO1/ROBO2/SOX1/WNT5A/SLIT2/SALL3/BCL11B/HES5	11
BP	GO:0061005	cell differentiation involved in kidney development	11/1133	54/18670	0.000335404	0.00432813	0.00325732	BMP4/GDNF/GPR4/MMP9/PDGFB/ADIPOQ/YAP1/SIX2/WWTR1/LGR4/FAT4	11
BP	GO:0003229	ventricular cardiac muscle tissue development	11/1133	55/18670	0.000396577	0.0049305	0.00371066	COL11A1/DSP/FOXC1/MYH6/RYR2/TBX3/TGFBR3/ZFPM2/HEY2/ADAMTS9/CCM2L	11
BP	GO:0098900	regulation of action potential	11/1133	55/18670	0.000396577	0.0049305	0.00371066	ANK2/CACNA2D1/CAV1/CNR1/DSP/FGF12/FGF13/GJA5/RYR2/NOS1AP/CTNNA3	11
BP	GO:0032722	positive regulation of chemokine production	11/1133	58/18670	0.000638823	0.0068985	0.00519177	FFAR3/IFNG/IL7/LBP/TWIST1/WNT5A/ADIPOQ/POSTN/TSLP/IL33/MCOLN2	11
BP	GO:0001658	branching involved in ureteric bud morphogenesis	11/1133	59/18670	0.00074284	0.00778206	0.00585674	BMP4/GDNF/HOXA11/HOXB7/PBX1/SIX1/SOX9/SIX2/SIX4/LGR4/FAT4	11
BP	GO:0042490	mechanoreceptor differentiation	11/1133	61/18670	0.000993252	0.00969111	0.00729348	BMP4/GABRB2/GABRB3/NTRK2/NTRK3/CLRN1/HEY2/ESRP1/MCOLN3/FAT4/HES5	11
BP	GO:0060675	ureteric bud morphogenesis	11/1133	65/18670	0.00170416	0.014838	0.011167	BMP4/GDNF/HOXA11/HOXB7/PBX1/SIX1/SOX9/SIX2/SIX4/LGR4/FAT4	11
BP	GO:0021872	forebrain generation of neurons	11/1133	66/18670	0.00193506	0.0165471	0.0124533	ASCL1/DLX5/ERBB4/ROBO1/ROBO2/SOX1/WNT5A/SLIT2/SALL3/BCL11B/HES5	11
BP	GO:0046888	negative regulation of hormone secretion	11/1133	66/18670	0.00193506	0.0165471	0.0124533	ADRA2C/CRH/GHSR/INHBB/KCNJ11/PRKN/SFRP1/KALRN/ADIPOQ/STXBP5L/ACVR1C	11
BP	GO:0072171	mesonephric tubule morphogenesis	11/1133	66/18670	0.00193506	0.0165471	0.0124533	BMP4/GDNF/HOXA11/HOXB7/PBX1/SIX1/SOX9/SIX2/SIX4/LGR4/FAT4	11
BP	GO:0050918	positive chemotaxis	11/1133	68/18670	0.00247324	0.019618	0.0147644	BMP4/GDNF/KDR/MET/NTRK3/PDGFB/CCL16/CX3CL1/CXCL12/VEGFC/WNT5A	11
BP	GO:0071230	cellular response to amino acid stimulus	11/1133	68/18670	0.00247324	0.019618	0.0147644	ASS1/COL1A1/COL1A2/COL3A1/COL4A1/COL16A1/EGFR/NTRK2/PDGFRA/SIX1/CPEB1	11
BP	GO:0055008	cardiac muscle tissue morphogenesis	11/1133	69/18670	0.00278442	0.0212838	0.0160181	COL11A1/DSP/FOXC1/MYBPC2/MYH6/RYR2/TGFBR3/WNT5A/ZFPM2/HEY2/CCM2L	11
BP	GO:0051966	regulation of synaptic transmission, glutamatergic	11/1133	70/18670	0.00312639	0.0231624	0.0174319	CNR1/EGFR/GRM8/HTR1B/HTR2A/ROR2/RELN/NLGN1/SHANK2/DKK1/CACNG4	11
BP	GO:0061180	mammary gland epithelium development	11/1133	72/18670	0.00391132	0.027284	0.0205338	EPHA2/ERBB4/GLI2/HOXA5/IRF6/PGR/ROBO1/TBX3/WNT5A/WNT7B/SOSTDC1	11
BP	GO:0045685	regulation of glial cell differentiation	11/1133	73/18670	0.00435876	0.0298473	0.0224629	EPHA4/ID4/NTRK3/PTN/OLIG2/ZNF365/DAAM2/TENM4/TMEM98/IL34/HES5	11
BP	GO:1903779	regulation of cardiac conduction	11/1133	73/18670	0.00435876	0.0298473	0.0224629	ANK2/ATP1A4/ATP1B2/CAV1/GJA5/KCNJ11/NPR1/RYR2/TRPC1/ABCC9/TRDN	11
BP	GO:0099601	regulation of neurotransmitter receptor activity	11/1133	74/18670	0.00484595	0.0322647	0.0242822	ANXA3/CRH/DLG3/GRIA3/IFNG/NEFL/RELN/NLGN1/SHANK2/CACNG4/SHISA7	11
BP	GO:0008344	adult locomotory behavior	11/1133	77/18670	0.00657015	0.0411829	0.030994	EPHA4/FGF12/GDNF/HOXB8/PRKN/PBX3/CXCL12/UCHL1/KALRN/CHL1/PREX2	11
BP	GO:0048678	response to axon injury	11/1133	77/18670	0.00657015	0.0411829	0.030994	APOD/ARG1/DPYSL3/EPHA4/TNC/LGALS1/NEFL/NTRK3/PTN/PTPRS/FLRT3	11
BP	GO:0070664	negative regulation of leukocyte proliferation	11/1133	78/18670	0.00724075	0.0438574	0.0330069	ARG1/BMP4/CTLA4/LRRC32/IL2/IL10/CCL8/XCL1/VSIG4/TNFRSF13B/GAL	11
BP	GO:0048708	astrocyte differentiation	11/1133	81/18670	0.0095762	0.0550396	0.0414225	EGFR/EPHA4/ID4/IFNG/NTRK3/ROR1/ROR2/SOX9/TAL1/SOX6/HES5	11
BP	GO:0046209	nitric oxide metabolic process	11/1133	82/18670	0.0104714	0.0596629	0.044902	ASS1/CAV1/CPS1/HBB/IFNG/IL10/MMP8/NOS2/PTGIS/RORA/NOS1AP	11
BP	GO:0045682	regulation of epidermis development	11/1133	85/18670	0.0135443	0.0719643	0.05416	BMP4/FOXC1/HOXA7/SULT2B1/WNT5A/FST/HEY2/GRHL1/GAL/ESRP1/HES5	11
BP	GO:2001057	reactive nitrogen species metabolic process	11/1133	85/18670	0.0135443	0.0719643	0.05416	ASS1/CAV1/CPS1/HBB/IFNG/IL10/MMP8/NOS2/PTGIS/RORA/NOS1AP	11
BP	GO:0043506	regulation of JUN kinase activity	11/1133	88/18670	0.017255	0.0861767	0.0648561	CD40LG/EPHA4/ROR2/SFRP1/SFRP2/WNT5A/WNT7B/FZD4/DKK1/SASH1/DAB2IP	11
BP	GO:0106027	neuron projection organization	11/1133	88/18670	0.017255	0.0861767	0.0648561	ABCD2/APOE/CTTN/EPHA4/EPHB1/LGMN/RELN/KALRN/NLGN1/ZNF365/SHANK2	11
CC	GO:0098644	complex of collagen trimers	11/1188	19/19717	1.75317e-09	7.82551e-08	6.00607e-08	COL1A1/COL1A2/COL2A1/COL3A1/COL4A1/COL4A2/COL5A1/COL8A1/COL11A1/LUM/COL5A3	11
CC	GO:0035580	specific granule lumen	11/1188	62/19717	0.00107912	0.00756927	0.00580941	ARG1/CHI3L1/CHIT1/LCN2/LTF/MMP8/ORM1/PGLYRP1/PRG3/OLFM4/QPCT	11
CC	GO:0031594	neuromuscular junction	11/1188	76/19717	0.005649	0.0315188	0.0241907	ACHE/CDH15/DLG3/EPHA4/EPHA7/NEFL/PTN/SPOCK1/STXBP5L/POSTN/PDZRN3	11
CC	GO:0005901	caveola	11/1188	80/19717	0.00831235	0.0437952	0.0336128	FASLG/CAV1/CDH1/CDH15/HTR2A/KCNA5/PTGIS/NOS1AP/ASAH2/PLVAP/GASK1A	11
CC	GO:0016528	sarcoplasm	11/1188	80/19717	0.00831235	0.0437952	0.0336128	ANK1/CACNA2D1/RYR2/SGCD/SPOCK1/NOS1AP/TRDN/SYNE2/RASD1/P3H2/JPH1	11
CC	GO:0005902	microvillus	11/1188	83/19717	0.0108806	0.0523762	0.0401987	CEACAM1/CLCA1/FOXA1/MYO6/PDGFRA/SLC10A2/CLRN1/VCAM1/PDPN/FMN2/ESPN	11
MF	GO:0015026	coreceptor activity	10/1117	44/17697	0.000332748	0.00593282	0.00482167	CD8A/CD28/NGFR/ROR1/ROR2/TGFBR3/GPC6/RAMP2/LILRA4/FCRL1	10
MF	GO:0008028	monocarboxylic acid transmembrane transporter activity	10/1117	50/17697	0.000976211	0.0134109	0.0108992	CEACAM1/SLC6A1/SLC10A2/SLC16A2/SLCO2A1/SLCO2B1/SLCO1C1/SLC51B/SLC16A14/SLC5A12	10
MF	GO:0099529	neurotransmitter receptor activity involved in regulation of postsynaptic membrane potential	10/1117	50/17697	0.000976211	0.0134109	0.0108992	ADRB1/GABRA2/GABRB2/GABRB3/GABRD/GABRE/GABRG2/GRIA3/GRID1/GRIK4	10
MF	GO:0098960	postsynaptic neurotransmitter receptor activity	10/1117	52/17697	0.0013408	0.0162839	0.0132341	ADRB1/GABRA2/GABRB2/GABRB3/GABRD/GABRE/GABRG2/GRIA3/GRID1/GRIK4	10
MF	GO:0022824	transmitter-gated ion channel activity	10/1117	61/17697	0.00457509	0.0430778	0.0350098	GABRA2/GABRB2/GABRB3/GABRD/GABRE/GABRG2/GRIA3/GRID1/GRIK4/HTR3A	10
MF	GO:0022835	transmitter-gated channel activity	10/1117	61/17697	0.00457509	0.0430778	0.0350098	GABRA2/GABRB2/GABRB3/GABRD/GABRE/GABRG2/GRIA3/GRID1/GRIK4/HTR3A	10
BP	GO:1905809	negative regulation of synapse organization	10/1133	25/18670	9.19703e-07	4.83672e-05	3.64009e-05	APOE/EPHA7/NFATC4/PTK2/PTN/ROBO2/WNT5A/NLGN1/ARHGEF15/DKK1	10
BP	GO:0010464	regulation of mesenchymal cell proliferation	10/1133	33/18670	1.66709e-05	0.000434022	0.000326643	BMP4/FGF9/LMNA/NFIB/PRRX1/PTN/SIX1/SOX9/WNT5A/CHRD	10
BP	GO:0003203	endocardial cushion morphogenesis	10/1133	35/18670	2.95838e-05	0.000662047	0.000498253	BMP5/ROBO1/ROBO2/SNAI2/SOX9/TBX2/TWIST1/HEY1/HEY2/TMEM100	10
BP	GO:0021955	central nervous system neuron axonogenesis	10/1133	35/18670	2.95838e-05	0.000662047	0.000498253	CDH11/DCC/EPHA4/EPHB1/GLI2/NFIB/PTK2/DCLK1/SLIT2/TSKU	10
BP	GO:0048333	mesodermal cell differentiation	10/1133	35/18670	2.95838e-05	0.000662047	0.000498253	BMP4/EYA2/HOXA11/SFRP2/TAL1/HMGA2/ITGA8/SIX2/DKK1/SOX17	10
BP	GO:0086091	regulation of heart rate by cardiac conduction	10/1133	38/18670	6.44903e-05	0.00121705	0.000915944	ANK2/CACNA2D1/CAV1/DSP/GJA5/KCNA5/KCNH2/KCNJ3/CTNNA3/KCNE1B	10
BP	GO:0060306	regulation of membrane repolarization	10/1133	39/18670	8.20487e-05	0.00145775	0.0010971	ANK2/CACNA2D1/CAV1/GJA1/GJA5/KCNA5/KCNH2/NOS1AP/NEDD4L/KCNE1B	10
BP	GO:2000826	regulation of heart morphogenesis	10/1133	39/18670	8.20487e-05	0.00145775	0.0010971	BMP4/FOXC1/ROBO1/ROBO2/SIX1/SOX9/TBX2/TWIST1/SEMA3C/DKK1	10
BP	GO:0072210	metanephric nephron development	10/1133	40/18670	0.000103499	0.00169037	0.00127217	BMP4/GDNF/PDGFB/PDGFRA/SOX9/ADIPOQ/SIX2/LGR4/IRX2/HES5	10
BP	GO:0035850	epithelial cell differentiation involved in kidney development	10/1133	44/18670	0.000242788	0.00333374	0.00250895	BMP4/GDNF/GPR4/MMP9/PDGFB/ADIPOQ/YAP1/SIX2/WWTR1/FAT4	10
BP	GO:0035987	endodermal cell differentiation	10/1133	45/18670	0.000295371	0.00392262	0.00295214	COL4A2/COL5A1/COL8A1/COL11A1/COL12A1/MMP8/MMP9/HMGA2/DKK1/SOX17	10
BP	GO:0001504	neurotransmitter uptake	10/1133	46/18670	0.000357137	0.00452575	0.00340605	GDNF/PRKN/RAB3B/SLC1A1/SLC1A7/SLC6A1/SLC6A2/SLC6A9/SLC22A3/SNAP25	10
BP	GO:1903115	regulation of actin filament-based movement	10/1133	47/18670	0.000429297	0.00521403	0.00392405	ANK2/CAV1/DSP/FGF13/GJA5/RYR2/STC1/NOS1AP/PDPN/CTNNA3	10
BP	GO:0002063	chondrocyte development	10/1133	48/18670	0.000513166	0.00585031	0.00440291	COL6A3/COL11A1/COL12A1/MATN3/VIT/SFRP2/SOX9/SULF1/COL21A1/VWA2	10
BP	GO:0030850	prostate gland development	10/1133	48/18670	0.000513166	0.00585031	0.00440291	BMP4/GLI2/FOXA1/TNC/ID4/PLAG1/SFRP1/SOX9/WNT5A/SULF1	10
BP	GO:0048546	digestive tract morphogenesis	10/1133	49/18670	0.000610164	0.00667121	0.00502072	BMP4/EGFR/GLI2/PDGFRA/SFRP1/SFRP2/WNT5A/SIX2/SOX17/NKX2-3	10
BP	GO:0001706	endoderm formation	10/1133	50/18670	0.000721821	0.00759253	0.0057141	COL4A2/COL5A1/COL8A1/COL11A1/COL12A1/MMP8/MMP9/HMGA2/DKK1/SOX17	10
BP	GO:0071398	cellular response to fatty acid	10/1133	57/18670	0.00206551	0.0173246	0.0130384	APOB/ASS1/CPS1/FFAR3/TNC/ID3/NFATC4/PRKAA2/SFRP1/PID1	10
BP	GO:0006879	cellular iron ion homeostasis	10/1133	61/18670	0.00346512	0.0247596	0.0186339	ALAS2/GDF2/LCN2/LTF/TF/ABCG2/HEPH/SLC22A17/ERFE/SCARA5	10
BP	GO:0032835	glomerulus development	10/1133	62/18670	0.00391179	0.027284	0.0205338	BMP4/ENPEP/FOXC1/GPR4/PDGFB/PDGFRA/ADIPOQ/SULF1/WWTR1/LGR4	10
BP	GO:0048747	muscle fiber development	10/1133	67/18670	0.00686978	0.0424538	0.0319505	BMP4/KEL/MYBPC2/MYF6/MYH6/SGCD/SIX1/UCHL1/XK/MYO18B	10
BP	GO:0060038	cardiac muscle cell proliferation	10/1133	67/18670	0.00686978	0.0424538	0.0319505	ERBB4/FGF9/FOXC1/GJA1/TBX2/TGFBR3/YAP1/ZFPM2/HEY2/TENM4	10
BP	GO:0031343	positive regulation of cell killing	10/1133	68/18670	0.0076278	0.0457407	0.0344242	ARG1/CD5L/IFNG/NOS2/XCL1/IL18RAP/PGLYRP1/PGLYRP4/ULBP2/IL23R	10
BP	GO:0042698	ovulation cycle	10/1133	69/18670	0.00844872	0.0495338	0.0372788	EGFR/MMP7/MMP19/PDGFRA/PGR/PTN/ROBO2/SLIT3/FZD4/SLIT2	10
BP	GO:0010517	regulation of phospholipase activity	10/1133	70/18670	0.00933577	0.0539525	0.0406044	AGTR1/EDNRA/EGFR/FLT1/HTR2A/ITK/NTRK2/NTRK3/PDGFRA/PLA2R1	10
BP	GO:0032272	negative regulation of protein polymerization	10/1133	72/18670	0.0113214	0.0625414	0.0470683	ADD2/CDH5/DMTN/MAP2/SPTA1/SPTB/SLIT2/TUBB4A/TMSB15A/STMN2	10
BP	GO:0050805	negative regulation of synaptic transmission	10/1133	72/18670	0.0113214	0.0625414	0.0470683	ACHE/HTR1B/HTR2A/PRKN/SLC6A1/ADIPOQ/SHANK2/SORCS3/PCDH17/NLGN4X	10
BP	GO:0060193	positive regulation of lipase activity	10/1133	72/18670	0.0113214	0.0625414	0.0470683	AGTR1/EDNRA/EGFR/FLT1/HTR2A/ITK/NTRK2/NTRK3/PDGFRA/GPIHBP1	10
BP	GO:0032945	negative regulation of mononuclear cell proliferation	10/1133	73/18670	0.0124266	0.067792	0.0510199	ARG1/BMP4/CTLA4/LRRC32/IL2/IL10/XCL1/VSIG4/TNFRSF13B/GAL	10
BP	GO:0050672	negative regulation of lymphocyte proliferation	10/1133	73/18670	0.0124266	0.067792	0.0510199	ARG1/BMP4/CTLA4/LRRC32/IL2/IL10/XCL1/VSIG4/TNFRSF13B/GAL	10
BP	GO:0051145	smooth muscle cell differentiation	10/1133	74/18670	0.0136111	0.0719643	0.05416	BMP4/FGF9/NFATC4/PDGFB/SIX1/SOX9/ITGA8/RAMP2/HEY1/HEY2	10
BP	GO:0007422	peripheral nervous system development	10/1133	75/18670	0.0148781	0.0771638	0.0580731	ASIC2/ETV1/GDNF/GFRA3/NTRK2/NTRK3/UGT8/ADGRG6/FA2H/SH3TC2	10
BP	GO:0006809	nitric oxide biosynthetic process	10/1133	77/18670	0.0176729	0.0878468	0.066113	ASS1/CAV1/HBB/IFNG/IL10/MMP8/NOS2/PTGIS/RORA/NOS1AP	10
CC	GO:0060076	excitatory synapse	10/1188	50/19717	0.00068354	0.00532727	0.00408868	CALB2/GRIA3/KCNJ3/SLC6A9/NLGN4Y/NLGN1/NLGN4X/CADM3/CADPS2/SHISA7	10
CC	GO:1904724	tertiary granule lumen	10/1188	55/19717	0.00148122	0.00996272	0.00764638	CHIT1/HBB/LTF/MMP8/MMP9/ORM1/PGLYRP1/PRG3/OLFM4/QPCT	10
CC	GO:0045334	clathrin-coated endocytic vesicle	10/1188	63/19717	0.00418959	0.0244892	0.0187954	APOB/APOE/CTLA4/MYO6/ROR2/TYRP1/WNT5A/FZD4/CD207/SFTPA1	10
CC	GO:0016529	sarcoplasmic reticulum	10/1188	71/19717	0.00982273	0.0492139	0.0377716	ANK1/CACNA2D1/RYR2/SGCD/NOS1AP/TRDN/SYNE2/RASD1/P3H2/JPH1	10
CC	GO:0044291	cell-cell contact zone	10/1188	71/19717	0.00982273	0.0492139	0.0377716	ANK2/DSP/FGF13/GJA1/GJA5/KCNA5/KCNJ11/CTNNA3/AJAP1/OPALIN	10
MF	GO:0019825	oxygen binding	9/1117	36/17697	0.000306938	0.00559161	0.00454437	CYP2C18/HBA1/HBA2/HBM/HBB/HBG2/HBQ1/MB/TDO2	9
MF	GO:0048020	CCR chemokine receptor binding	9/1117	43/17697	0.00123469	0.0154428	0.0125505	CCL1/CCL8/CCL14/CCL16/CCL18/CCL23/XCL1/CX3CL1/XCL2	9
MF	GO:1904315	transmitter-gated ion channel activity involved in regulation of postsynaptic membrane potential	9/1117	47/17697	0.0023787	0.026578	0.0216003	GABRA2/GABRB2/GABRB3/GABRD/GABRE/GABRG2/GRIA3/GRID1/GRIK4	9
MF	GO:0005044	scavenger receptor activity	9/1117	51/17697	0.00423749	0.0408163	0.0331719	CD5L/CD6/CFI/ENPP1/CD163/TMPRSS4/TMPRSS3/LOXL4/SCARA5	9
MF	GO:0003707	steroid hormone receptor activity	9/1117	56/17697	0.00796642	0.0612464	0.0497757	ESR2/ESRRG/HNF4G/PGR/RORA/RORB/NR2F1/NR2F2/THRB	9
BP	GO:0021952	central nervous system projection neuron axonogenesis	9/1133	25/18670	9.10782e-06	0.000278477	0.00020958	CDH11/DCC/EPHA4/EPHB1/GLI2/NFIB/DCLK1/SLIT2/TSKU	9
BP	GO:0072202	cell differentiation involved in metanephros development	9/1133	25/18670	9.10782e-06	0.000278477	0.00020958	BMP4/GDNF/PDGFB/ADIPOQ/YAP1/SIX2/WWTR1/LGR4/FAT4	9
BP	GO:0045992	negative regulation of embryonic development	9/1133	26/18670	1.31814e-05	0.000365643	0.000275181	BMP4/COL5A1/SFRP2/TBX2/WNT5A/DKK1/SULF1/RPS6KA6/SOX17	9
BP	GO:0060740	prostate gland epithelium morphogenesis	9/1133	26/18670	1.31814e-05	0.000365643	0.000275181	BMP4/GLI2/FOXA1/TNC/ID4/SFRP1/SOX9/WNT5A/SULF1	9
BP	GO:0099560	synaptic membrane adhesion	9/1133	26/18670	1.31814e-05	0.000365643	0.000275181	CDH9/PCDH8/PTPRD/PTPRS/SPARCL1/NLGN1/FLRT3/PCDH17/LRRC4C	9
BP	GO:0003180	aortic valve morphogenesis	9/1133	28/18670	2.60944e-05	0.00062061	0.000467067	BMP4/ROBO1/ROBO2/SLIT3/SNAI2/SOX9/TWIST1/SLIT2/HEY2	9
BP	GO:0060512	prostate gland morphogenesis	9/1133	28/18670	2.60944e-05	0.00062061	0.000467067	BMP4/GLI2/FOXA1/TNC/ID4/SFRP1/SOX9/WNT5A/SULF1	9
BP	GO:0003401	axis elongation	9/1133	31/18670	6.45668e-05	0.00121705	0.000915944	BMP4/TNC/SFRP1/SFRP2/SIX1/SOX9/WNT5A/YAP1/SIX4	9
BP	GO:0010543	regulation of platelet activation	9/1133	31/18670	6.45668e-05	0.00121705	0.000915944	APOE/CEACAM1/DMTN/PDGFB/PDGFRA/PRKG1/PDPN/C1QTNF1/ADAMTS18	9
BP	GO:0003176	aortic valve development	9/1133	32/18670	8.50252e-05	0.00149548	0.00112549	BMP4/ROBO1/ROBO2/SLIT3/SNAI2/SOX9/TWIST1/SLIT2/HEY2	9
BP	GO:0001893	maternal placenta development	9/1133	35/18670	0.000181523	0.00265913	0.00200125	EPOR/GHSR/GJA1/GJB2/PTGIS/PTN/STC1/NR2F2/STC2	9
BP	GO:0098801	regulation of renal system process	9/1133	35/18670	0.000181523	0.00265913	0.00200125	AGTR1/GJA1/GJA5/NPR1/PDGFB/STC1/ADIPOQ/CORO2B/SPX	9
BP	GO:0110111	negative regulation of animal organ morphogenesis	9/1133	35/18670	0.000181523	0.00265913	0.00200125	CEACAM1/BMP4/FOXC1/NFIB/TBX2/THRB/WNT5A/SULF1/RSPO2	9
BP	GO:0060428	lung epithelium development	9/1133	36/18670	0.000229114	0.00317919	0.00239264	ASCL1/BMP4/FOXA1/HOXA5/NFIB/SOX9/THRB/WNT7B/YAP1	9
BP	GO:0003156	regulation of animal organ formation	9/1133	37/18670	0.000286613	0.00383536	0.00288647	BMP4/GDNF/HOXA11/ROBO1/ROBO2/SIX1/WNT5A/DKK1/SULF1	9
BP	GO:0048713	regulation of oligodendrocyte differentiation	9/1133	39/18670	0.000437597	0.00527826	0.00397239	ID4/PTN/OLIG2/ZNF365/DAAM2/TENM4/TMEM98/IL34/HES5	9
BP	GO:0090184	positive regulation of kidney development	9/1133	40/18670	0.000534593	0.0060331	0.00454048	BMP4/GDNF/HOXB7/PDGFB/SIX1/SOX9/ADIPOQ/SIX4/LGR4	9
BP	GO:0099622	cardiac muscle cell membrane repolarization	9/1133	42/18670	0.000781532	0.00810666	0.00610103	ANK2/CACNA2D1/GJA1/GJA5/KCNA5/KCNH2/KCNJ3/NOS1AP/KCNE1B	9
BP	GO:0086004	regulation of cardiac muscle cell contraction	9/1133	43/18670	0.000935923	0.00921726	0.00693686	ANK2/CAV1/DSP/FGF13/GJA5/RYR2/STC1/NOS1AP/CTNNA3	9
BP	GO:0003416	endochondral bone growth	9/1133	44/18670	0.00111416	0.0106148	0.00798862	COL6A3/COL12A1/MATN3/MMP13/DDR2/VIT/STC1/COL21A1/VWA2	9
BP	GO:0048483	autonomic nervous system development	9/1133	45/18670	0.00131885	0.0120414	0.0090623	ASCL1/EDNRA/GDNF/GFRA3/HOXB2/SIX1/VCAM1/KIF26A/NAV2	9
BP	GO:0051932	synaptic transmission, GABAergic	9/1133	45/18670	0.00131885	0.0120414	0.0090623	CNR1/GABRA2/GABRB2/GABRE/GABRG2/HTR1B/SLC6A1/SYN3/NLGN1	9
BP	GO:0090278	negative regulation of peptide hormone secretion	9/1133	45/18670	0.00131885	0.0120414	0.0090623	CRH/GHSR/INHBB/KCNJ11/PRKN/SFRP1/KALRN/STXBP5L/ACVR1C	9
BP	GO:1900271	regulation of long-term synaptic potentiation	9/1133	45/18670	0.00131885	0.0120414	0.0090623	APOE/CALB2/EPHA4/MME/LGMN/RELN/PTN/CYP46A1/SHISA7	9
BP	GO:0045776	negative regulation of blood pressure	9/1133	46/18670	0.00155279	0.0137697	0.010363	ADRB1/CNR1/CRH/GJA5/FFAR3/NOS2/VEGFC/ADIPOQ/ARHGAP42	9
BP	GO:0098868	bone growth	9/1133	47/18670	0.00181887	0.01566	0.0117856	COL6A3/COL12A1/MATN3/MMP13/DDR2/VIT/STC1/COL21A1/VWA2	9
BP	GO:2001239	regulation of extrinsic apoptotic signaling pathway in absence of ligand	9/1133	47/18670	0.00181887	0.01566	0.0117856	COL2A1/EYA4/EYA2/GDNF/IL7/CX3CL1/SNAI2/PRDX2/SRPX	9
BP	GO:0010107	potassium ion import	9/1133	48/18670	0.00212019	0.0174595	0.0131399	ATP1A4/ATP1B2/KCNH2/KCNJ3/KCNJ11/KCNJ15/SLC12A3/ABCC9/WNK2	9
BP	GO:0055010	ventricular cardiac muscle tissue morphogenesis	9/1133	48/18670	0.00212019	0.0174595	0.0131399	COL11A1/DSP/FOXC1/MYH6/RYR2/TGFBR3/ZFPM2/HEY2/CCM2L	9
BP	GO:0030857	negative regulation of epithelial cell differentiation	9/1133	49/18670	0.00245995	0.0195717	0.0147295	CAV1/FRZB/HOXA7/IFNG/MMP9/SOX9/TBX3/YAP1/HES5	9
BP	GO:0060425	lung morphogenesis	9/1133	50/18670	0.00284149	0.0215945	0.0162519	BMP4/FOXA1/HOXA5/TNC/NFIB/SOX9/WNT7B/YAP1/RSPO2	9
BP	GO:0048641	regulation of skeletal muscle tissue development	9/1133	51/18670	0.00326828	0.0236748	0.0178175	EPHB1/MYF6/SIX1/TLL2/TWIST1/DKK1/SIX4/CYP26B1/SOX17	9
BP	GO:0030514	negative regulation of BMP signaling pathway	9/1133	52/18670	0.00374393	0.0264997	0.0199436	HTRA1/SFRP1/SFRP2/WNT5A/CHRD/DKK1/SOSTDC1/GREM2/BMPER	9
BP	GO:0045661	regulation of myoblast differentiation	9/1133	53/18670	0.00427211	0.0293687	0.0221027	BMP4/ID3/IGFBP3/CXCL9/MYF6/SOX9/TBX3/CXCL14/SOSTDC1	9
BP	GO:0010524	positive regulation of calcium ion transport into cytosol	9/1133	54/18670	0.00485664	0.0322647	0.0242822	APLNR/CAV1/CXCL9/XCL1/CX3CL1/THY1/TRPC1/TRPC3/TRDN	9
BP	GO:0002011	morphogenesis of an epithelial sheet	9/1133	55/18670	0.00550139	0.0359401	0.0270484	CEACAM1/BMP5/COL5A1/HOXB2/HOXB4/WNT5A/PDPN/FLRT3/PHLDB2	9
BP	GO:0043030	regulation of macrophage activation	9/1133	55/18670	0.00550139	0.0359401	0.0270484	IL10/LBP/MMP8/RORA/CX3CL1/WNT5A/VSIG4/IL33/ADGRF5	9
BP	GO:0070830	bicellular tight junction assembly	9/1133	55/18670	0.00550139	0.0359401	0.0270484	EPHA2/GJA1/SNAI2/TJP1/PATJ/RAMP2/POF1B/FRMPD2/OCLN	9
BP	GO:0097120	receptor localization to synapse	9/1133	55/18670	0.00550139	0.0359401	0.0270484	DLG3/GHSR/KIF5A/RELN/SNAP25/GPC6/CPLX1/NLGN1/CACNG4	9
BP	GO:0022029	telencephalon cell migration	9/1133	56/18670	0.00621033	0.0390671	0.0294017	EGFR/FGF13/RELN/ROBO1/CXCL12/SLIT2/NRG3/SYNE2/DAB2IP	9
BP	GO:0060113	inner ear receptor cell differentiation	9/1133	56/18670	0.00621033	0.0390671	0.0294017	BMP4/GABRB2/GABRB3/CLRN1/HEY2/ESRP1/MCOLN3/FAT4/HES5	9
BP	GO:0120192	tight junction assembly	9/1133	56/18670	0.00621033	0.0390671	0.0294017	EPHA2/GJA1/SNAI2/TJP1/PATJ/RAMP2/POF1B/FRMPD2/OCLN	9
BP	GO:0001755	neural crest cell migration	9/1133	57/18670	0.00698748	0.0429461	0.032321	BMP4/EDN3/ERBB4/GDNF/PITX2/TWIST1/SEMA3C/SEMA5B/SEMA6D	9
BP	GO:0042743	hydrogen peroxide metabolic process	9/1133	57/18670	0.00698748	0.0429461	0.032321	EGFR/HBA1/HBA2/HBM/HBB/HBG2/HBQ1/MAOB/PRDX2	9
BP	GO:0010518	positive regulation of phospholipase activity	9/1133	59/18670	0.00876277	0.0510903	0.0384503	AGTR1/EDNRA/EGFR/FLT1/HTR2A/ITK/NTRK2/NTRK3/PDGFRA	9
BP	GO:0021885	forebrain cell migration	9/1133	59/18670	0.00876277	0.0510903	0.0384503	EGFR/FGF13/RELN/ROBO1/CXCL12/SLIT2/NRG3/SYNE2/DAB2IP	9
BP	GO:0031102	neuron projection regeneration	9/1133	59/18670	0.00876277	0.0510903	0.0384503	APOD/EPHA4/TNC/NEFL/NTRK3/PRRX1/PTN/PTPRS/THY1	9
BP	GO:0097755	positive regulation of blood vessel diameter	9/1133	59/18670	0.00876277	0.0510903	0.0384503	ADRB1/APOE/CPS1/EGFR/EPHX2/GJA1/GJA5/PRKG1/ARHGAP42	9
BP	GO:0120193	tight junction organization	9/1133	60/18670	0.00976916	0.0560262	0.042165	EPHA2/GJA1/SNAI2/TJP1/PATJ/RAMP2/POF1B/FRMPD2/OCLN	9
BP	GO:0032370	positive regulation of lipid transport	9/1133	61/18670	0.0108602	0.0608243	0.0457761	APOE/CRH/LRAT/ADIPOQ/LIPG/PLA2R1/GAL/C1QTNF1/ERFE	9
BP	GO:0034113	heterotypic cell-cell adhesion	9/1133	61/18670	0.0108602	0.0608243	0.0457761	DSP/IL10/LCK/THY1/VCAM1/ADIPOQ/CTNNA3/PARVA/PERP	9
BP	GO:1901862	negative regulation of muscle tissue development	9/1133	62/18670	0.0120402	0.0659576	0.0496393	BMP4/EPHB1/GJA1/IGFBP5/TLL2/TWIST1/DKK1/SIX4/SOX6	9
BP	GO:0035418	protein localization to synapse	9/1133	63/18670	0.0133131	0.0712968	0.0536576	ASIC2/GHSR/KIF5A/SNAP25/WNT5A/GPC6/CPLX1/NLGN1/PCLO	9
BP	GO:0043297	apical junction assembly	9/1133	64/18670	0.014683	0.0762272	0.0573682	EPHA2/GJA1/SNAI2/TJP1/PATJ/RAMP2/POF1B/FRMPD2/OCLN	9
BP	GO:0006940	regulation of smooth muscle contraction	9/1133	65/18670	0.0161541	0.0820818	0.0617743	ADRA2C/CAV1/CHRM3/CTTN/GHSR/PRKG1/NMU/SPX/ARHGAP42	9
BP	GO:0030858	positive regulation of epithelial cell differentiation	9/1133	67/18670	0.0194156	0.0934188	0.0703065	BMP4/CDH5/FOXC1/GDF2/GDNF/SOX9/SULT2B1/ADIPOQ/TMEM100	9
BP	GO:0051705	multi-organism behavior	9/1133	67/18670	0.0194156	0.0934188	0.0703065	GAD1/GRID1/KALRN/NRXN3/NLGN4Y/SHANK2/CNTNAP2/GCNT4/NLGN4X	9
CC	GO:0016342	catenin complex	9/1188	29/19717	3.388e-05	0.000415877	0.000319185	CDH1/CDH5/CDH6/CDH8/CDH9/CDH10/CDH11/CDH15/CDH22	9
CC	GO:0034707	chloride channel complex	9/1188	50/19717	0.00270982	0.017058	0.013092	GABRA2/GABRB2/GABRB3/GABRD/GABRE/GABRG2/CLIC5/ANO1/BEST3	9
CC	GO:0045178	basal part of cell	9/1188	51/19717	0.00311799	0.0193789	0.0148733	CEACAM1/EGFR/ERBB4/FAP/MET/TF/CLRN1/PHLDB2/GKN2	9
CC	GO:0098878	neurotransmitter receptor complex	9/1188	53/19717	0.00407867	0.024128	0.0185183	DLG3/GRIA3/GRIK4/HTR3A/NLGN1/SHANK2/CACNG4/OLFM3/SHISA7	9
CC	GO:0046658	anchored component of plasma membrane	9/1188	59/19717	0.00838441	0.0437952	0.0336128	GPC5/THY1/GPC6/CNTN5/PRMT8/ULBP2/IGSF21/GPIHBP1/RGS7BP	9
MF	GO:0048407	platelet-derived growth factor binding	8/1117	11/17697	3.41847e-08	2.60426e-06	2.11651e-06	COL1A1/COL1A2/COL2A1/COL3A1/COL4A1/COL5A1/PDGFB/PDGFRA	8
MF	GO:0005520	insulin-like growth factor binding	8/1117	28/17697	0.000244907	0.00466437	0.00379079	CCN2/IGFBP3/IGFBP4/IGFBP5/HTRA1/CCN5/CCN4/ESM1	8
MF	GO:0005109	frizzled binding	8/1117	39/17697	0.00261286	0.0280715	0.0228141	ROR2/SFRP1/WNT5A/WNT7B/WNT10A/RSPO3/RSPO1/RSPO2	8
MF	GO:1901618	organic hydroxy compound transmembrane transporter activity	8/1117	44/17697	0.00569561	0.0502412	0.0408317	CEACAM1/SLC6A2/SLC10A2/SLC22A3/SLCO2B1/SLCO1C1/SLC51B/SLC5A12	8
MF	GO:0004879	nuclear receptor activity	8/1117	47/17697	0.00855483	0.0645851	0.0524891	ESR2/ESRRG/PGR/RORA/RORB/NR2F1/NR2F2/THRB	8
MF	GO:0098531	transcription factor activity, direct ligand regulated sequence-specific DNA binding	8/1117	47/17697	0.00855483	0.0645851	0.0524891	ESR2/ESRRG/PGR/RORA/RORB/NR2F1/NR2F2/THRB	8
MF	GO:0005326	neurotransmitter transporter activity	8/1117	51/17697	0.0138844	0.093832	0.0762584	SLC1A1/SLC1A7/SLC6A1/SLC6A2/SLC6A8/SLC6A9/CPLX1/SLC6A19	8
MF	GO:0004601	peroxidase activity	8/1117	52/17697	0.0155282	0.0989642	0.0804294	HBA1/HBA2/HBM/HBB/HBG2/HBQ1/PRDX2/GPX8	8
BP	GO:0015669	gas transport	8/1133	19/18670	7.42704e-06	0.000244118	0.000183722	HBA1/HBA2/HBM/HBB/HBG2/HBQ1/MB/RHAG	8
BP	GO:0030903	notochord development	8/1133	20/18670	1.17202e-05	0.000342424	0.000257707	COL2A1/EPHA2/GLI2/ID3/SOX9/WNT5A/YAP1/COBL	8
BP	GO:0090189	regulation of branching involved in ureteric bud morphogenesis	8/1133	22/18670	2.66746e-05	0.00062153	0.00046776	BMP4/GDNF/HOXB7/SIX1/SOX9/SIX2/SIX4/LGR4	8
BP	GO:0072243	metanephric nephron epithelium development	8/1133	23/18670	3.87309e-05	0.000814743	0.000613171	SOX9/WNT7B/ADIPOQ/YAP1/WWTR1/LGR4/FAT4/HES5	8
BP	GO:0046697	decidualization	8/1133	24/18670	5.50163e-05	0.00106764	0.000803501	EPOR/GHSR/GJA1/GJB2/PTGIS/PTN/STC1/STC2	8
BP	GO:0034110	regulation of homotypic cell-cell adhesion	8/1133	25/18670	7.66203e-05	0.00140399	0.00105664	CEACAM1/DMTN/LGALS1/PRKG1/PDPN/C1QTNF1/CCM2L/ADAMTS18	8
BP	GO:0061217	regulation of mesonephros development	8/1133	25/18670	7.66203e-05	0.00140399	0.00105664	BMP4/GDNF/HOXB7/SIX1/SOX9/SIX2/SIX4/LGR4	8
BP	GO:0060074	synapse maturation	8/1133	26/18670	0.000104815	0.00170658	0.00128436	NEFL/NFIA/NFATC4/RELN/ARHGEF15/SYBU/IGSF21/DAB2IP	8
BP	GO:0072207	metanephric epithelium development	8/1133	27/18670	0.00014107	0.00217446	0.00163648	SOX9/WNT7B/ADIPOQ/YAP1/WWTR1/LGR4/FAT4/HES5	8
BP	GO:0001958	endochondral ossification	8/1133	28/18670	0.00018706	0.00271754	0.00204521	ALPL/BMP4/COL1A1/COL2A1/DLX5/FOXC1/MMP13/TMEM119	8
BP	GO:0036075	replacement ossification	8/1133	28/18670	0.00018706	0.00271754	0.00204521	ALPL/BMP4/COL1A1/COL2A1/DLX5/FOXC1/MMP13/TMEM119	8
BP	GO:0061037	negative regulation of cartilage development	8/1133	30/18670	0.00031605	0.00411412	0.00309626	NKX3-2/BMP4/EFEMP1/FRZB/GLI2/SNAI2/SOX9/CCN4	8
BP	GO:0099068	postsynapse assembly	8/1133	30/18670	0.00031605	0.00411412	0.00309626	NTRK3/PTPRD/PTPRS/WNT5A/NLGN4Y/NLGN1/SHANK2/NLGN4X	8
BP	GO:0009954	proximal/distal pattern formation	8/1133	31/18670	0.000403522	0.00496984	0.00374027	GLI2/HOXA9/HOXA10/HOXA11/PBX1/CYP26B1/IRX2/HES5	8
BP	GO:0097106	postsynaptic density organization	8/1133	31/18670	0.000403522	0.00496984	0.00374027	DLG3/NTRK3/RELN/PTPRD/PTPRS/NLGN1/SHANK2/TMEM108	8
BP	GO:0099625	ventricular cardiac muscle cell membrane repolarization	8/1133	31/18670	0.000403522	0.00496984	0.00374027	ANK2/CACNA2D1/GJA1/GJA5/KCNH2/KCNJ3/NOS1AP/KCNE1B	8
BP	GO:0003338	metanephros morphogenesis	8/1133	32/18670	0.000509687	0.00585031	0.00440291	BMP4/GDNF/SOX9/WNT7B/SIX2/LGR4/FRAS1/HES5	8
BP	GO:0099623	regulation of cardiac muscle cell membrane repolarization	8/1133	32/18670	0.000509687	0.00585031	0.00440291	ANK2/CACNA2D1/GJA1/GJA5/KCNA5/KCNH2/NOS1AP/KCNE1B	8
BP	GO:0099084	postsynaptic specialization organization	8/1133	33/18670	0.000637377	0.00689705	0.00519068	DLG3/NTRK3/RELN/PTPRD/PTPRS/NLGN1/SHANK2/TMEM108	8
BP	GO:0003382	epithelial cell morphogenesis	8/1133	34/18670	0.000789661	0.00811099	0.00610429	FAT1/MET/STC1/BCL11B/POF1B/COL18A1/FRMD6/VSIG1	8
BP	GO:0031128	developmental induction	8/1133	34/18670	0.000789661	0.00811099	0.00610429	BMP4/GDNF/HOXA11/ROBO1/ROBO2/SIX1/SOX9/DKK1	8
BP	GO:0048665	neuron fate specification	8/1133	34/18670	0.000789661	0.00811099	0.00610429	ASCL1/GLI2/FOXA1/NTRK3/SIX1/SOX1/MYT1L/ESRP1	8
BP	GO:0070050	neuron cellular homeostasis	8/1133	34/18670	0.000789661	0.00811099	0.00610429	CALB2/CNR1/HTR1B/NELL2/PRKN/CX3CL1/SLC6A2/TSPOAP1	8
BP	GO:0098901	regulation of cardiac muscle cell action potential	8/1133	34/18670	0.000789661	0.00811099	0.00610429	ANK2/CAV1/DSP/FGF13/GJA5/RYR2/NOS1AP/CTNNA3	8
BP	GO:0002385	mucosal immune response	8/1133	36/18670	0.00118149	0.0110168	0.00829115	DEFA3/FFAR3/LTF/NOS2/XCL1/BPIFB1/IFNLR1/C17orf99	8
BP	GO:0003417	growth plate cartilage development	8/1133	36/18670	0.00118149	0.0110168	0.00829115	COL6A3/COL12A1/MATN3/MMP13/VIT/STC1/COL21A1/VWA2	8
BP	GO:1901099	negative regulation of signal transduction in absence of ligand	8/1133	36/18670	0.00118149	0.0110168	0.00829115	COL2A1/EYA4/EYA2/GDNF/IL7/CX3CL1/SNAI2/PRDX2	8
BP	GO:2000310	regulation of NMDA receptor activity	8/1133	36/18670	0.00118149	0.0110168	0.00829115	ANXA3/CRH/DLG3/GRIA3/IFNG/NEFL/RELN/NLGN1	8
BP	GO:2001240	negative regulation of extrinsic apoptotic signaling pathway in absence of ligand	8/1133	36/18670	0.00118149	0.0110168	0.00829115	COL2A1/EYA4/EYA2/GDNF/IL7/CX3CL1/SNAI2/PRDX2	8
BP	GO:0033280	response to vitamin D	8/1133	37/18670	0.00142835	0.0128405	0.0096637	ALPL/TNC/PHEX/PTN/SFRP1/SNAI2/STC1/STC2	8
BP	GO:0002251	organ or tissue specific immune response	8/1133	39/18670	0.00204394	0.017171	0.0129228	DEFA3/FFAR3/LTF/NOS2/XCL1/BPIFB1/IFNLR1/C17orf99	8
BP	GO:0001941	postsynaptic membrane organization	8/1133	40/18670	0.00242128	0.0193552	0.0145666	APOE/GDNF/RELN/PTN/NLGN4Y/NLGN1/NLGN4X/SHISA7	8
BP	GO:0014046	dopamine secretion	8/1133	40/18670	0.00242128	0.0193552	0.0145666	CNR1/GDNF/HTR1B/HTR2A/KCNA2/PRKN/CXCL12/SYT6	8
BP	GO:0014059	regulation of dopamine secretion	8/1133	40/18670	0.00242128	0.0193552	0.0145666	CNR1/GDNF/HTR1B/HTR2A/KCNA2/PRKN/CXCL12/SYT6	8
BP	GO:0045823	positive regulation of heart contraction	8/1133	40/18670	0.00242128	0.0193552	0.0145666	ADRB1/CCN2/EDN3/RYR2/SLC1A1/NOS1AP/NMU/HEY2	8
BP	GO:0071548	response to dexamethasone	8/1133	40/18670	0.00242128	0.0193552	0.0145666	ARG1/ASS1/CPS1/CRH/EGFR/GHSR/GJB2/PCK1	8
BP	GO:1901381	positive regulation of potassium ion transmembrane transport	8/1133	41/18670	0.00285103	0.0216358	0.016283	ANK2/ATP1B2/EDN3/KCNH2/NOS1AP/GAL/WNK2/LRRC38	8
BP	GO:0010470	regulation of gastrulation	8/1133	42/18670	0.00333797	0.0239814	0.0180483	COL5A1/IL10/SFRP2/ADIPOQ/DKK1/TENM4/SOX17/PHLDB2	8
BP	GO:0015701	bicarbonate transport	8/1133	42/18670	0.00333797	0.0239814	0.0180483	CA1/CA3/HBA1/HBA2/HBB/RHAG/SLC4A1/SLC4A4	8
BP	GO:2001222	regulation of neuron migration	8/1133	42/18670	0.00333797	0.0239814	0.0180483	COL3A1/ERBB4/RELN/CX3CL1/NRG3/FLRT2/DAB2IP/NEXMIF	8
BP	GO:0010863	positive regulation of phospholipase C activity	8/1133	43/18670	0.00388702	0.0272195	0.0204852	EDNRA/EGFR/FLT1/HTR2A/ITK/NTRK2/NTRK3/PDGFRA	8
BP	GO:1990573	potassium ion import across plasma membrane	8/1133	43/18670	0.00388702	0.0272195	0.0204852	ATP1A4/ATP1B2/KCNH2/KCNJ3/KCNJ11/KCNJ15/SLC12A3/ABCC9	8
BP	GO:1900274	regulation of phospholipase C activity	8/1133	45/18670	0.00519171	0.0343005	0.0258144	EDNRA/EGFR/FLT1/HTR2A/ITK/NTRK2/NTRK3/PDGFRA	8
BP	GO:0048806	genitalia development	8/1133	47/18670	0.00680682	0.0422135	0.0317696	BMP5/FOXF2/ROR2/PDGFRA/TBX3/WNT5A/SYCP2/LGR4	8
BP	GO:0060986	endocrine hormone secretion	8/1133	47/18670	0.00680682	0.0422135	0.0317696	AGTR1/CRH/INHBB/TBX3/FZD4/GAL/C1QTNF1/SELENOM	8
BP	GO:0061383	trabecula morphogenesis	8/1133	47/18670	0.00680682	0.0422135	0.0317696	BMP5/COL1A1/SFRP1/TGFBR3/HEY1/HEY2/ADGRG6/CCM2L	8
BP	GO:0070849	response to epidermal growth factor	8/1133	47/18670	0.00680682	0.0422135	0.0317696	ASCL1/COL1A1/EGFR/ERBB4/FOXC1/SNAI2/SOX9/DAB2IP	8
BP	GO:0007528	neuromuscular junction development	8/1133	48/18670	0.00774414	0.0463327	0.0348697	COL4A1/TNC/PTN/SIX1/KALRN/SHANK2/PDZRN3/SIX4	8
BP	GO:0043268	positive regulation of potassium ion transport	8/1133	48/18670	0.00774414	0.0463327	0.0348697	ANK2/ATP1B2/EDN3/KCNH2/NOS1AP/GAL/WNK2/LRRC38	8
BP	GO:0060042	retina morphogenesis in camera-type eye	8/1133	49/18670	0.0087752	0.0511061	0.0384622	PTN/RORB/SOX9/THRB/THY1/TSPAN12/FJX1/SDK1	8
BP	GO:0009948	anterior/posterior axis specification	8/1133	50/18670	0.00990543	0.0566841	0.0426601	BMP4/HOXD8/TBX3/WNT5A/SIX2/HEY2/WLS/TDRD5	8
BP	GO:0021545	cranial nerve development	8/1133	51/18670	0.0111403	0.0619309	0.0466088	EPHB1/HOXA3/HOXB2/HOXB3/KCNA2/SIX1/SIX4/NAV2	8
BP	GO:0035176	social behavior	8/1133	52/18670	0.012485	0.0679698	0.0511537	GAD1/GRID1/KALRN/NRXN3/NLGN4Y/SHANK2/CNTNAP2/NLGN4X	8
BP	GO:0051703	intraspecies interaction between organisms	8/1133	52/18670	0.012485	0.0679698	0.0511537	GAD1/GRID1/KALRN/NRXN3/NLGN4Y/SHANK2/CNTNAP2/NLGN4X	8
BP	GO:0006584	catecholamine metabolic process	8/1133	54/18670	0.0155257	0.0798921	0.0601264	EPAS1/GPR37/MAOA/MAOB/NPR1/PAH/PRKN/RNF180	8
BP	GO:0009712	catechol-containing compound metabolic process	8/1133	54/18670	0.0155257	0.0798921	0.0601264	EPAS1/GPR37/MAOA/MAOB/NPR1/PAH/PRKN/RNF180	8
BP	GO:0070206	protein trimerization	8/1133	54/18670	0.0155257	0.0798921	0.0601264	ARG1/COL1A1/COL1A2/LCN2/TCL1A/ADIPOQ/C1QTNF1/SCARA5	8
BP	GO:0042220	response to cocaine	8/1133	55/18670	0.017232	0.0861767	0.0648561	CNR1/CRH/HTR1B/HTR2A/HTR3A/SLC6A1/CACNG4/SDK1	8
BP	GO:0061098	positive regulation of protein tyrosine kinase activity	8/1133	55/18670	0.017232	0.0861767	0.0648561	DLG3/DOCK3/EPHA4/NTRK2/PDGFB/RELN/TAL1/GPRC5B	8
BP	GO:0060043	regulation of cardiac muscle cell proliferation	8/1133	57/18670	0.0210414	0.0996011	0.0749592	ERBB4/FGF9/GJA1/TBX2/TGFBR3/YAP1/ZFPM2/HEY2	8
CC	GO:0005583	fibrillar collagen trimer	8/1188	11/19717	2.37928e-08	7.78817e-07	5.97742e-07	COL1A1/COL1A2/COL2A1/COL3A1/COL5A1/COL11A1/LUM/COL5A3	8
CC	GO:0098643	banded collagen fibril	8/1188	11/19717	2.37928e-08	7.78817e-07	5.97742e-07	COL1A1/COL1A2/COL2A1/COL3A1/COL5A1/COL11A1/LUM/COL5A3	8
CC	GO:0014704	intercalated disc	8/1188	50/19717	0.00951283	0.0486541	0.037342	ANK2/DSP/FGF13/GJA1/GJA5/KCNA5/KCNJ11/CTNNA3	8
CC	GO:0008328	ionotropic glutamate receptor complex	8/1188	51/19717	0.0107026	0.0520293	0.0399324	DLG3/GRIA3/GRIK4/NLGN1/SHANK2/CACNG4/OLFM3/SHISA7	8
KEGG	hsa05143	African trypanosomiasis	8/528	37/8076	0.00225554	0.043156	0.0392543	FASLG/HBA1/HBA2/HBB/IFNG/IL10/LAMA4/VCAM1	8
MF	GO:0005344	oxygen carrier activity	7/1117	14/17697	9.07316e-06	0.000262183	0.000213079	HBA1/HBA2/HBM/HBB/HBG2/HBQ1/MB	7
MF	GO:0005003	ephrin receptor activity	7/1117	19/17697	0.000100682	0.00216338	0.0017582	EPHA2/EPHA3/EPHA4/EPHA7/EPHB1/NTRK3/EPHA10	7
MF	GO:0030021	extracellular matrix structural constituent conferring compression resistance	7/1117	22/17697	0.000288274	0.00536831	0.00436289	BGN/DCN/FMOD/LUM/PRELP/PRG3/PODN	7
MF	GO:0045499	chemorepellent activity	7/1117	27/17697	0.00113715	0.0146605	0.0119147	EPHA7/SEMA3C/NRG3/FLRT3/FLRT2/SEMA5B/SEMA6D	7
MF	GO:0008519	ammonium transmembrane transporter activity	7/1117	30/17697	0.0022085	0.0250097	0.0203257	RHAG/RHCE/RHD/SLC6A2/SLC6A8/SLC22A3/RHCG	7
MF	GO:0042056	chemoattractant activity	7/1117	38/17697	0.00882263	0.065428	0.0531741	BMP4/GDNF/PDGFB/CCL16/CX3CL1/VEGFC/WNT5A	7
MF	GO:0016709	oxidoreductase activity, acting on paired donors, with incorporation or reduction of molecular oxygen, NAD(P)H as one donor, and incorporation of one atom of oxygen	7/1117	39/17697	0.010181	0.0735491	0.0597742	FMO2/FMO3/CYP4F3/NOS2/CYP46A1/CYP26B1/CYP4F12	7
BP	GO:0021889	olfactory bulb interneuron differentiation	7/1133	12/18670	1.79962e-06	7.82164e-05	5.88653e-05	DLX5/ERBB4/ROBO1/ROBO2/WNT5A/SLIT2/SALL3	7
BP	GO:0015671	oxygen transport	7/1133	15/18670	1.2437e-05	0.000351645	0.000264646	HBA1/HBA2/HBM/HBB/HBG2/HBQ1/MB	7
BP	GO:0003184	pulmonary valve morphogenesis	7/1133	17/18670	3.37513e-05	0.000733463	0.000552	BMP4/GJA5/ROBO1/ROBO2/SLIT2/HEY1/HEY2	7
BP	GO:0001710	mesodermal cell fate commitment	7/1133	19/18670	7.85381e-05	0.00141449	0.00106454	BMP4/EYA2/HOXA11/SFRP2/SIX2/DKK1/SOX17	7
BP	GO:0003422	growth plate cartilage morphogenesis	7/1133	19/18670	7.85381e-05	0.00141449	0.00106454	COL6A3/COL12A1/MATN3/VIT/STC1/COL21A1/VWA2	7
BP	GO:0010544	negative regulation of platelet activation	7/1133	19/18670	7.85381e-05	0.00141449	0.00106454	APOE/CEACAM1/PDGFB/PDGFRA/PRKG1/C1QTNF1/ADAMTS18	7
BP	GO:0060602	branch elongation of an epithelium	7/1133	20/18670	0.000114517	0.00182498	0.00137347	BMP4/TNC/SIX1/SOX9/WNT5A/YAP1/SIX4	7
BP	GO:0072234	metanephric nephron tubule development	7/1133	20/18670	0.000114517	0.00182498	0.00137347	SOX9/WNT7B/YAP1/WWTR1/LGR4/FAT4/HES5	7
BP	GO:0003177	pulmonary valve development	7/1133	21/18670	0.000162812	0.00245338	0.0018464	BMP4/GJA5/ROBO1/ROBO2/SLIT2/HEY1/HEY2	7
BP	GO:2000738	positive regulation of stem cell differentiation	7/1133	21/18670	0.000162812	0.00245338	0.0018464	BMP4/FOXC1/HOXB4/PTN/SOX9/SEMA3C/SOX6	7
BP	GO:0001759	organ induction	7/1133	22/18670	0.000226343	0.00315829	0.00237691	BMP4/GDNF/HOXA11/ROBO1/ROBO2/SIX1/DKK1	7
BP	GO:0060487	lung epithelial cell differentiation	7/1133	22/18670	0.000226343	0.00315829	0.00237691	ASCL1/FOXA1/HOXA5/NFIB/SOX9/THRB/YAP1	7
BP	GO:0032331	negative regulation of chondrocyte differentiation	7/1133	23/18670	0.000308424	0.00403482	0.00303659	NKX3-2/BMP4/EFEMP1/GLI2/SNAI2/SOX9/CCN4	7
BP	GO:0060479	lung cell differentiation	7/1133	23/18670	0.000308424	0.00403482	0.00303659	ASCL1/FOXA1/HOXA5/NFIB/SOX9/THRB/YAP1	7
BP	GO:0072170	metanephric tubule development	7/1133	23/18670	0.000308424	0.00403482	0.00303659	SOX9/WNT7B/YAP1/WWTR1/LGR4/FAT4/HES5	7
BP	GO:0072215	regulation of metanephros development	7/1133	23/18670	0.000308424	0.00403482	0.00303659	BMP4/GDNF/PDGFB/ADIPOQ/YAP1/WWTR1/FAT4	7
BP	GO:2000050	regulation of non-canonical Wnt signaling pathway	7/1133	23/18670	0.000308424	0.00403482	0.00303659	MLLT3/SFRP1/SFRP2/WNT5A/DKK1/DAAM2/RSPO3	7
BP	GO:0060571	morphogenesis of an epithelial fold	7/1133	25/18670	0.000543492	0.00609429	0.00458653	BMP4/BMP5/EGFR/GLI2/WNT5A/SULF1/SOSTDC1	7
BP	GO:0003148	outflow tract septum morphogenesis	7/1133	27/18670	0.000902523	0.00902351	0.00679105	BMP4/ROBO1/ROBO2/TBX2/SEMA3C/ZFPM2/PARVA	7
BP	GO:0060307	regulation of ventricular cardiac muscle cell membrane repolarization	7/1133	27/18670	0.000902523	0.00902351	0.00679105	ANK2/CACNA2D1/GJA1/GJA5/KCNH2/NOS1AP/KCNE1B	7
BP	GO:0007263	nitric oxide mediated signal transduction	7/1133	29/18670	0.00142621	0.0128405	0.0096637	APOE/EGFR/GUCY1A2/NOS2/NOS1AP/RASD1/NDNF	7
BP	GO:0060441	epithelial tube branching involved in lung morphogenesis	7/1133	29/18670	0.00142621	0.0128405	0.0096637	BMP4/FOXA1/HOXA5/TNC/SOX9/YAP1/RSPO2	7
BP	GO:0003413	chondrocyte differentiation involved in endochondral bone morphogenesis	7/1133	30/18670	0.00176408	0.0153091	0.0115215	COL6A3/COL12A1/MATN3/VIT/SOX9/COL21A1/VWA2	7
BP	GO:0021772	olfactory bulb development	7/1133	30/18670	0.00176408	0.0153091	0.0115215	DLX5/ERBB4/ROBO1/ROBO2/WNT5A/SLIT2/SALL3	7
BP	GO:0021988	olfactory lobe development	7/1133	31/18670	0.00216091	0.0176738	0.0133012	DLX5/ERBB4/ROBO1/ROBO2/WNT5A/SLIT2/SALL3	7
BP	GO:0086011	membrane repolarization during action potential	7/1133	31/18670	0.00216091	0.0176738	0.0133012	CACNA2D1/CAV1/KCNA5/KCNH2/KCNJ3/NOS1AP/KCNE1B	7
BP	GO:0042744	hydrogen peroxide catabolic process	7/1133	32/18670	0.00262325	0.0203476	0.0153135	HBA1/HBA2/HBM/HBB/HBG2/HBQ1/PRDX2	7
BP	GO:0045907	positive regulation of vasoconstriction	7/1133	32/18670	0.00262325	0.0203476	0.0153135	ADRA2C/CAV1/CHRM3/EGFR/GJA1/GJA5/HTR2A	7
BP	GO:0060317	cardiac epithelial to mesenchymal transition	7/1133	32/18670	0.00262325	0.0203476	0.0153135	SNAI2/TGFBR3/TWIST1/OLFM1/HEY1/HEY2/TMEM100	7
BP	GO:0061311	cell surface receptor signaling pathway involved in heart development	7/1133	32/18670	0.00262325	0.0203476	0.0153135	BMP4/SNAI2/WNT5A/DKK1/HEY1/HEY2/SOX17	7
BP	GO:0071295	cellular response to vitamin	7/1133	32/18670	0.00262325	0.0203476	0.0153135	COL1A1/TNC/PHEX/PTN/SFRP1/SNAI2/POSTN	7
BP	GO:0086019	cell-cell signaling involved in cardiac conduction	7/1133	32/18670	0.00262325	0.0203476	0.0153135	ANK2/CACNA2D1/GJA1/GJA5/KCNA5/KCNJ3/RYR2	7
BP	GO:1904467	regulation of tumor necrosis factor secretion	7/1133	32/18670	0.00262325	0.0203476	0.0153135	GHSR/IFNG/MMP8/ORM1/CX3CL1/WNT5A/AKAP12	7
BP	GO:0010092	specification of animal organ identity	7/1133	33/18670	0.00315791	0.0231624	0.0174319	BMP4/GDNF/HOXA11/ROBO1/ROBO2/SIX1/DKK1	7
BP	GO:0048821	erythrocyte development	7/1133	33/18670	0.00315791	0.0231624	0.0174319	EPB42/DMTN/RHAG/SLC4A1/TAL1/SOX6/ADGRF5	7
BP	GO:0061036	positive regulation of cartilage development	7/1133	33/18670	0.00315791	0.0231624	0.0174319	BMP4/GDF2/HOXA11/SOX9/WNT5A/SOX6/PKDCC	7
BP	GO:1901890	positive regulation of cell junction assembly	7/1133	33/18670	0.00315791	0.0231624	0.0174319	CAV1/COL16A1/EPHA2/KDR/S100A10/SFRP1/THY1	7
BP	GO:0060795	cell fate commitment involved in formation of primary germ layer	7/1133	34/18670	0.0037719	0.0266261	0.0200386	BMP4/EYA2/HOXA11/SFRP2/SIX2/DKK1/SOX17	7
BP	GO:0140115	export across plasma membrane	7/1133	34/18670	0.0037719	0.0266261	0.0200386	ATP1A4/ATP1B2/KCNA3/KCNA5/KCNH2/KCNT2/KCNE1B	7
BP	GO:1905332	positive regulation of morphogenesis of an epithelium	7/1133	35/18670	0.00447242	0.030439	0.0229082	BMP4/GDNF/HOXB7/SIX1/SOX9/SIX4/LGR4	7
BP	GO:1990774	tumor necrosis factor secretion	7/1133	35/18670	0.00447242	0.030439	0.0229082	GHSR/IFNG/MMP8/ORM1/CX3CL1/WNT5A/AKAP12	7
BP	GO:0010453	regulation of cell fate commitment	7/1133	36/18670	0.00526678	0.0346225	0.0260567	BMP4/SFRP2/DKK1/SOSTDC1/ESRP1/SOX17/IL23R	7
BP	GO:0033762	response to glucagon	7/1133	36/18670	0.00526678	0.0346225	0.0260567	ADCY2/ARG1/ASS1/CDO1/CPS1/GJB2/PCK1	7
BP	GO:0038083	peptidyl-tyrosine autophosphorylation	7/1133	37/18670	0.00616241	0.0390671	0.0294017	CAV1/EGFR/ITK/KDR/LCK/PTK2/ROS1	7
BP	GO:0043114	regulation of vascular permeability	7/1133	37/18670	0.00616241	0.0390671	0.0294017	CEACAM1/CDH5/NPR1/SLIT2/AKAP12/RAMP2/C2CD4A	7
BP	GO:0048846	axon extension involved in axon guidance	7/1133	37/18670	0.00616241	0.0390671	0.0294017	CXCL12/SLIT3/WNT5A/SLIT2/SEMA3C/SEMA5B/SEMA6D	7
BP	GO:0071542	dopaminergic neuron differentiation	7/1133	37/18670	0.00616241	0.0390671	0.0294017	FOXA1/LMX1B/SFRP1/SFRP2/WNT5A/DKK1/RSPO2	7
BP	GO:1902284	neuron projection extension involved in neuron projection guidance	7/1133	37/18670	0.00616241	0.0390671	0.0294017	CXCL12/SLIT3/WNT5A/SLIT2/SEMA3C/SEMA5B/SEMA6D	7
BP	GO:0046676	negative regulation of insulin secretion	7/1133	38/18670	0.00716679	0.0435724	0.0327924	GHSR/INHBB/KCNJ11/PRKN/SFRP1/STXBP5L/ACVR1C	7
BP	GO:0060045	positive regulation of cardiac muscle cell proliferation	7/1133	38/18670	0.00716679	0.0435724	0.0327924	ERBB4/FGF9/TBX2/TGFBR3/YAP1/ZFPM2/HEY2	7
BP	GO:0060416	response to growth hormone	7/1133	38/18670	0.00716679	0.0435724	0.0327924	ASS1/CPS1/GHR/GHSR/IGFBP5/PHEX/PTK2	7
BP	GO:0030501	positive regulation of bone mineralization	7/1133	39/18670	0.00828742	0.0487887	0.0367181	BMP4/LTF/PTN/KL/PKDCC/OSR2/TMEM119	7
BP	GO:0001709	cell fate determination	7/1133	40/18670	0.00953175	0.0548441	0.0412753	ASCL1/BMP4/PRRX1/TBX2/POU6F2/CYP26B1/SOX17	7
BP	GO:0009187	cyclic nucleotide metabolic process	7/1133	40/18670	0.00953175	0.0548441	0.0412753	ADCY2/EPHA2/GUCY1A2/NPR1/PDE1A/RORA/PDE10A	7
BP	GO:0051281	positive regulation of release of sequestered calcium ion into cytosol	7/1133	40/18670	0.00953175	0.0548441	0.0412753	APLNR/CXCL9/XCL1/CX3CL1/THY1/TRPC1/TRDN	7
BP	GO:0035136	forelimb morphogenesis	7/1133	41/18670	0.0109072	0.0609574	0.0458762	HOXA9/HOXA11/TBX3/TWIST1/SALL3/OSR2/RSPO2	7
BP	GO:1902893	regulation of pri-miRNA transcription by RNA polymerase II	7/1133	41/18670	0.0109072	0.0609574	0.0458762	BMP4/IL10/NFATC4/NFIB/NGFR/PDGFB/SOX9	7
BP	GO:0001953	negative regulation of cell-matrix adhesion	7/1133	43/18670	0.0140804	0.073754	0.0555068	APOD/DMTN/HOXA7/POSTN/AJAP1/PHLDB2/NEXMIF	7
BP	GO:0006775	fat-soluble vitamin metabolic process	7/1133	43/18670	0.0140804	0.073754	0.0555068	CYP11A1/IFNG/LGMN/SNAI2/LRAT/CYP26B1/CYP4F12	7
BP	GO:0021795	cerebral cortex cell migration	7/1133	43/18670	0.0140804	0.073754	0.0555068	EGFR/FGF13/RELN/ROBO1/SLIT2/SYNE2/DAB2IP	7
BP	GO:0043616	keratinocyte proliferation	7/1133	43/18670	0.0140804	0.073754	0.0555068	IRF6/PRKD1/PTPRK/SNAI2/YAP1/BCL11B/EPPK1	7
BP	GO:0071364	cellular response to epidermal growth factor stimulus	7/1133	43/18670	0.0140804	0.073754	0.0555068	COL1A1/EGFR/ERBB4/FOXC1/SNAI2/SOX9/DAB2IP	7
BP	GO:0014047	glutamate secretion	7/1133	44/18670	0.0158923	0.0810648	0.0610089	NTRK2/SLC1A1/SLC1A7/SNAP25/PPFIA2/TSPOAP1/CPLX1	7
BP	GO:0001974	blood vessel remodeling	7/1133	45/18670	0.0178635	0.0884823	0.0665913	BGN/CEACAM1/EPAS1/FOXC1/HOXA3/SEMA3C/RSPO3	7
BP	GO:0048701	embryonic cranial skeleton morphogenesis	7/1133	45/18670	0.0178635	0.0884823	0.0665913	BMP4/PDGFRA/PRRX1/SIX1/TWIST1/SIX2/SIX4	7
BP	GO:0001754	eye photoreceptor cell differentiation	7/1133	46/18670	0.0200004	0.0959783	0.0722327	NTRK2/PTN/RORB/SOX9/THRB/THY1/OLFM3	7
BP	GO:0022602	ovulation cycle process	7/1133	46/18670	0.0200004	0.0959783	0.0722327	MMP19/PDGFRA/PGR/ROBO2/SLIT3/FZD4/SLIT2	7
CC	GO:0005833	hemoglobin complex	7/1188	12/19717	1.71628e-06	3.00961e-05	2.30988e-05	HBA1/HBA2/HBM/HBB/HBG2/HBQ1/AHSP	7
CC	GO:0030673	axolemma	7/1188	14/19717	6.68126e-06	9.9409e-05	7.62964e-05	ANK1/KCNJ11/MYO1D/ROBO2/THY1/EPB41L3/CNTNAP2	7
CC	GO:0071682	endocytic vesicle lumen	7/1188	20/19717	0.000109544	0.00116926	0.00089741	APOB/APOE/HBA1/HBA2/HBB/LTF/PGLYRP1	7
CC	GO:0031258	lamellipodium membrane	7/1188	22/19717	0.000216676	0.00217119	0.00166638	EPHA2/FAP/KCNA2/PDPN/NCKAP1/SYNE2/ANTXR1	7
CC	GO:0005921	gap junction	7/1188	32/19717	0.00252052	0.0160724	0.0123356	CALB2/DSC1/GJA1/GJA5/GJB2/TJP1/GJB6	7
CC	GO:0032590	dendrite membrane	7/1188	40/19717	0.00918505	0.0474722	0.0364349	GABRA2/GABRE/GABRG2/THY1/ITGA8/WLS/SHISA7	7
CC	GO:0030669	clathrin-coated endocytic vesicle membrane	7/1188	44/19717	0.0153361	0.0697226	0.053512	APOB/APOE/ROR2/TYRP1/WNT5A/FZD4/CD207	7
MF	GO:0031720	haptoglobin binding	6/1117	10/17697	1.05127e-05	0.000293656	0.000238657	HBA1/HBA2/HBM/HBB/HBG2/HBQ1	6
MF	GO:0005005	transmembrane-ephrin receptor activity	6/1117	17/17697	0.000421979	0.00721671	0.0058651	EPHA2/EPHA3/EPHA4/EPHA7/EPHB1/EPHA10	6
MF	GO:0004890	GABA-A receptor activity	6/1117	19/17697	0.0008295	0.0118366	0.00961971	GABRA2/GABRB2/GABRB3/GABRD/GABRE/GABRG2	6
MF	GO:0030506	ankyrin binding	6/1117	20/17697	0.00112222	0.0146605	0.0119147	CDH1/KCNJ11/RHAG/SLC4A1/SPTB/RHCG	6
MF	GO:0016917	GABA receptor activity	6/1117	22/17697	0.00193788	0.0225547	0.0183305	GABRA2/GABRB2/GABRB3/GABRD/GABRE/GABRG2	6
MF	GO:0005328	neurotransmitter:sodium symporter activity	6/1117	26/17697	0.00481622	0.0448444	0.0364456	SLC1A1/SLC6A1/SLC6A2/SLC6A8/SLC6A9/SLC6A19	6
MF	GO:0001968	fibronectin binding	6/1117	27/17697	0.00586739	0.0507104	0.0412129	CCN2/FBLN1/IGFBP3/IGFBP5/SFRP2/LRRC15	6
MF	GO:0005343	organic acid:sodium symporter activity	6/1117	28/17697	0.00707634	0.0571717	0.0464641	SLC1A1/SLC6A1/SLC6A8/SLC6A9/SLC10A2/SLC5A12	6
MF	GO:0071855	neuropeptide receptor binding	6/1117	32/17697	0.0137359	0.093583	0.076056	CRH/EDN3/GNAO1/NPY/NMU/GAL	6
BP	GO:0060788	ectodermal placode formation	6/1133	12/18670	3.31654e-05	0.000725622	0.000546099	EDA/SIX1/TBX2/TBX3/NRG3/SIX4	6
BP	GO:0071697	ectodermal placode morphogenesis	6/1133	12/18670	3.31654e-05	0.000725622	0.000546099	EDA/SIX1/TBX2/TBX3/NRG3/SIX4	6
BP	GO:0071696	ectodermal placode development	6/1133	13/18670	5.84265e-05	0.00112965	0.000850168	EDA/SIX1/TBX2/TBX3/NRG3/SIX4	6
BP	GO:0003188	heart valve formation	6/1133	14/18670	9.6996e-05	0.00160916	0.00121104	GJA5/SOX9/TWIST1/OLFM1/HEY1/HEY2	6
BP	GO:0007501	mesodermal cell fate specification	6/1133	14/18670	9.6996e-05	0.00160916	0.00121104	EYA2/HOXA11/SFRP2/SIX2/DKK1/SOX17	6
BP	GO:0021781	glial cell fate commitment	6/1133	14/18670	9.6996e-05	0.00160916	0.00121104	ASCL1/SOX9/TAL1/OLIG2/SOX6/HES5	6
BP	GO:2001212	regulation of vasculogenesis	6/1133	14/18670	9.6996e-05	0.00160916	0.00121104	CEACAM1/KDR/RAMP2/HEY1/HEY2/TMEM100	6
BP	GO:0035988	chondrocyte proliferation	6/1133	17/18670	0.000341402	0.0043791	0.00329569	CCN2/LTF/DDR2/STC1/HMGA2/SIX2	6
BP	GO:0003414	chondrocyte morphogenesis involved in endochondral bone morphogenesis	6/1133	18/18670	0.000485933	0.00562891	0.00423628	COL6A3/COL12A1/MATN3/VIT/COL21A1/VWA2	6
BP	GO:0003429	growth plate cartilage chondrocyte morphogenesis	6/1133	18/18670	0.000485933	0.00562891	0.00423628	COL6A3/COL12A1/MATN3/VIT/COL21A1/VWA2	6
BP	GO:0072079	nephron tubule formation	6/1133	18/18670	0.000485933	0.00562891	0.00423628	GDNF/SIX1/SOX9/SIX4/IRX2/HES5	6
BP	GO:0090171	chondrocyte morphogenesis	6/1133	18/18670	0.000485933	0.00562891	0.00423628	COL6A3/COL12A1/MATN3/VIT/COL21A1/VWA2	6
BP	GO:0090190	positive regulation of branching involved in ureteric bud morphogenesis	6/1133	18/18670	0.000485933	0.00562891	0.00423628	GDNF/HOXB7/SIX1/SOX9/SIX4/LGR4	6
BP	GO:0090330	regulation of platelet aggregation	6/1133	18/18670	0.000485933	0.00562891	0.00423628	CEACAM1/DMTN/PRKG1/PDPN/C1QTNF1/ADAMTS18	6
BP	GO:1905276	regulation of epithelial tube formation	6/1133	18/18670	0.000485933	0.00562891	0.00423628	GDNF/SFRP1/SFRP2/SIX1/WNT5A/SIX4	6
BP	GO:0060438	trachea development	6/1133	19/18670	0.000673962	0.00720399	0.00542169	BMP4/EDA/HOXA5/SOX9/WNT7B/RSPO2	6
BP	GO:0060973	cell migration involved in heart development	6/1133	19/18670	0.000673962	0.00720399	0.00542169	BMP4/PITX2/SNAI2/TWIST1/SEMA3C/FLRT3	6
BP	GO:2000696	regulation of epithelial cell differentiation involved in kidney development	6/1133	19/18670	0.000673962	0.00720399	0.00542169	GDNF/MMP9/ADIPOQ/YAP1/WWTR1/FAT4	6
BP	GO:0001502	cartilage condensation	6/1133	20/18670	0.000913724	0.00904948	0.00681059	COL2A1/COL11A1/CCN2/MGP/ROR2/SOX9	6
BP	GO:0043586	tongue development	6/1133	20/18670	0.000913724	0.00904948	0.00681059	EGFR/SIX1/SIX4/CYP26B1/PRDM16/WNT10A	6
BP	GO:0086014	atrial cardiac muscle cell action potential	6/1133	20/18670	0.000913724	0.00904948	0.00681059	ANK2/GJA1/GJA5/KCNA5/KCNJ3/RYR2	6
BP	GO:0086026	atrial cardiac muscle cell to AV node cell signaling	6/1133	20/18670	0.000913724	0.00904948	0.00681059	ANK2/GJA1/GJA5/KCNA5/KCNJ3/RYR2	6
BP	GO:0086066	atrial cardiac muscle cell to AV node cell communication	6/1133	20/18670	0.000913724	0.00904948	0.00681059	ANK2/GJA1/GJA5/KCNA5/KCNJ3/RYR2	6
BP	GO:0003094	glomerular filtration	6/1133	21/18670	0.00121409	0.0112608	0.00847484	GJA1/GJA5/PDGFB/CORO2B/SULF1/ADGRF5	6
BP	GO:0061213	positive regulation of mesonephros development	6/1133	21/18670	0.00121409	0.0112608	0.00847484	GDNF/HOXB7/SIX1/SOX9/SIX4/LGR4	6
BP	GO:0098743	cell aggregation	6/1133	21/18670	0.00121409	0.0112608	0.00847484	COL2A1/COL11A1/CCN2/MGP/ROR2/SOX9	6
BP	GO:0021516	dorsal spinal cord development	6/1133	22/18670	0.00158449	0.0138971	0.0104589	ASCL1/GDNF/HOXB8/PBX3/TAL1/DAAM2	6
BP	GO:0035929	steroid hormone secretion	6/1133	22/18670	0.00158449	0.0138971	0.0104589	AGTR1/CRH/FZD4/GAL/C1QTNF1/SELENOM	6
BP	GO:0097205	renal filtration	6/1133	22/18670	0.00158449	0.0138971	0.0104589	GJA1/GJA5/PDGFB/CORO2B/SULF1/ADGRF5	6
BP	GO:0030539	male genitalia development	6/1133	23/18670	0.00203487	0.0171222	0.0128861	BMP5/ROR2/PDGFRA/TBX3/SYCP2/LGR4	6
BP	GO:0003272	endocardial cushion formation	6/1133	24/18670	0.00257557	0.0202465	0.0152374	BMP5/ROBO1/ROBO2/SNAI2/HEY2/TMEM100	6
BP	GO:0003418	growth plate cartilage chondrocyte differentiation	6/1133	24/18670	0.00257557	0.0202465	0.0152374	COL6A3/COL12A1/MATN3/VIT/COL21A1/VWA2	6
BP	GO:0003433	chondrocyte development involved in endochondral bone morphogenesis	6/1133	24/18670	0.00257557	0.0202465	0.0152374	COL6A3/COL12A1/MATN3/VIT/COL21A1/VWA2	6
BP	GO:0060343	trabecula formation	6/1133	24/18670	0.00257557	0.0202465	0.0152374	COL1A1/SFRP1/TGFBR3/HEY1/HEY2/ADGRG6	6
BP	GO:0086064	cell communication by electrical coupling involved in cardiac conduction	6/1133	24/18670	0.00257557	0.0202465	0.0152374	ATP1B2/CAV1/GJA1/GJA5/RYR2/TRDN	6
BP	GO:0001945	lymph vessel development	6/1133	25/18670	0.00321728	0.0233375	0.0175637	EPHA2/FOXC1/NR2F2/VEGFC/PDPN/CCBE1	6
BP	GO:0002053	positive regulation of mesenchymal cell proliferation	6/1133	25/18670	0.00321728	0.0233375	0.0175637	FGF9/PRRX1/SIX1/SOX9/WNT5A/CHRD	6
BP	GO:0003071	renal system process involved in regulation of systemic arterial blood pressure	6/1133	25/18670	0.00321728	0.0233375	0.0175637	AGTR1/GJA1/GJA5/PDGFB/CORO2B/CYP4F12	6
BP	GO:0006688	glycosphingolipid biosynthetic process	6/1133	25/18670	0.00321728	0.0233375	0.0175637	UGT8/LARGE1/ST8SIA5/A4GALT/FA2H/ST6GALNAC5	6
BP	GO:0045662	negative regulation of myoblast differentiation	6/1133	25/18670	0.00321728	0.0233375	0.0175637	BMP4/ID3/SOX9/TBX3/CXCL14/SOSTDC1	6
BP	GO:0072273	metanephric nephron morphogenesis	6/1133	25/18670	0.00321728	0.0233375	0.0175637	BMP4/GDNF/SOX9/SIX2/LGR4/HES5	6
BP	GO:1904861	excitatory synapse assembly	6/1133	25/18670	0.00321728	0.0233375	0.0175637	NTRK3/PTPRD/PTPRS/WNT5A/NLGN1/SHANK2	6
BP	GO:0003171	atrioventricular valve development	6/1133	26/18670	0.00397093	0.0274778	0.0206796	GJA5/SLIT3/TWIST1/OLFM1/HEY1/HEY2	6
BP	GO:0010460	positive regulation of heart rate	6/1133	26/18670	0.00397093	0.0274778	0.0206796	ADRB1/EDN3/RYR2/SLC1A1/NMU/HEY2	6
BP	GO:0060914	heart formation	6/1133	26/18670	0.00397093	0.0274778	0.0206796	BMP4/ROBO1/ROBO2/SIX1/DKK1/SOX17	6
BP	GO:0071377	cellular response to glucagon stimulus	6/1133	26/18670	0.00397093	0.0274778	0.0206796	ADCY2/ARG1/ASS1/CPS1/GJB2/PCK1	6
BP	GO:1900120	regulation of receptor binding	6/1133	26/18670	0.00397093	0.0274778	0.0206796	HOXA3/IL10/MMP9/PHLDA2/ADIPOQ/GREM2	6
BP	GO:0098810	neurotransmitter reuptake	6/1133	27/18670	0.00484762	0.0322647	0.0242822	GDNF/PRKN/RAB3B/SLC1A7/SLC6A1/SLC6A2	6
BP	GO:0034368	protein-lipid complex remodeling	6/1133	28/18670	0.00585851	0.0379879	0.0285895	AGTR1/APOB/APOC1/APOE/LIPG/GPIHBP1	6
BP	GO:0034369	plasma lipoprotein particle remodeling	6/1133	28/18670	0.00585851	0.0379879	0.0285895	AGTR1/APOB/APOC1/APOE/LIPG/GPIHBP1	6
BP	GO:0010644	cell communication by electrical coupling	6/1133	29/18670	0.00701477	0.0429461	0.032321	ATP1B2/CAV1/GJA1/GJA5/RYR2/TRDN	6
BP	GO:0021602	cranial nerve morphogenesis	6/1133	29/18670	0.00701477	0.0429461	0.032321	EPHB1/HOXA3/HOXB2/HOXB3/KCNA2/SIX1	6
BP	GO:0021884	forebrain neuron development	6/1133	29/18670	0.00701477	0.0429461	0.032321	ROBO1/ROBO2/SOX1/WNT5A/SLIT2/SALL3	6
BP	GO:0034367	protein-containing complex remodeling	6/1133	29/18670	0.00701477	0.0429461	0.032321	AGTR1/APOB/APOC1/APOE/LIPG/GPIHBP1	6
BP	GO:0071549	cellular response to dexamethasone stimulus	6/1133	30/18670	0.00832744	0.0489318	0.0368258	ARG1/ASS1/CRH/EGFR/GJB2/PCK1	6
BP	GO:0051385	response to mineralocorticoid	6/1133	32/18670	0.0114653	0.0630052	0.0474173	CRH/CCN2/HTR1B/MAOB/NEFL/NTRK3	6
BP	GO:0051968	positive regulation of synaptic transmission, glutamatergic	6/1133	32/18670	0.0114653	0.0630052	0.0474173	EGFR/ROR2/RELN/NLGN1/SHANK2/CACNG4	6
BP	GO:0061384	heart trabecula morphogenesis	6/1133	32/18670	0.0114653	0.0630052	0.0474173	BMP5/TGFBR3/HEY1/HEY2/ADGRG6/CCM2L	6
BP	GO:0070570	regulation of neuron projection regeneration	6/1133	32/18670	0.0114653	0.0630052	0.0474173	EPHA4/NTRK3/PRRX1/PTN/PTPRS/THY1	6
BP	GO:0010737	protein kinase A signaling	6/1133	33/18670	0.0133114	0.0712968	0.0536576	ADIPOQ/AKAP12/PDE10A/GAL/TCIM/MROH2B	6
BP	GO:0010837	regulation of keratinocyte proliferation	6/1133	33/18670	0.0133114	0.0712968	0.0536576	PRKD1/PTPRK/SNAI2/YAP1/BCL11B/EPPK1	6
BP	GO:0030513	positive regulation of BMP signaling pathway	6/1133	33/18670	0.0133114	0.0712968	0.0536576	BMP4/CDH5/GDF2/NEO1/SULF1/HES5	6
BP	GO:0035115	embryonic forelimb morphogenesis	6/1133	33/18670	0.0133114	0.0712968	0.0536576	HOXA9/HOXA11/TBX3/TWIST1/OSR2/RSPO2	6
BP	GO:0048011	neurotrophin TRK receptor signaling pathway	6/1133	33/18670	0.0133114	0.0712968	0.0536576	NGFR/NTRK2/NTRK3/SORT1/BCAR1/TMEM108	6
BP	GO:0048536	spleen development	6/1133	33/18670	0.0133114	0.0712968	0.0536576	NKX3-2/EPB42/HOXB4/PBX1/PITX2/NKX2-3	6
BP	GO:0060603	mammary gland duct morphogenesis	6/1133	33/18670	0.0133114	0.0712968	0.0536576	EPHA2/GLI2/PGR/TBX3/WNT5A/SOSTDC1	6
BP	GO:0048048	embryonic eye morphogenesis	6/1133	34/18670	0.0153555	0.0792491	0.0596424	EFEMP1/FOXF2/TBX2/TWIST1/WNT5A/VAX2	6
BP	GO:0048566	embryonic digestive tract development	6/1133	34/18670	0.0153555	0.0792491	0.0596424	FGF9/FOXF2/GLI2/PDGFRA/SIX2/PKDCC	6
BP	GO:0003230	cardiac atrium development	6/1133	35/18670	0.0176072	0.087603	0.0659296	ANK2/GJA5/MYH6/WNT5A/HEY2/CCM2L	6
BP	GO:0035909	aorta morphogenesis	6/1133	35/18670	0.0176072	0.087603	0.0659296	COL3A1/SIX1/TBX2/HEY1/HEY2/ADAMTS9	6
BP	GO:0000578	embryonic axis specification	6/1133	36/18670	0.0200753	0.0959783	0.0722327	HOXD8/TBX3/WNT5A/COBL/CXXC4/TDRD5	6
BP	GO:0030947	regulation of vascular endothelial growth factor receptor signaling pathway	6/1133	36/18670	0.0200753	0.0959783	0.0722327	FGF9/FLT1/VEGFC/FZD4/MMRN2/DAB2IP	6
BP	GO:0035137	hindlimb morphogenesis	6/1133	36/18670	0.0200753	0.0959783	0.0722327	BMP4/TBX3/TWIST1/SALL3/OSR2/RSPO2	6
BP	GO:0071709	membrane assembly	6/1133	36/18670	0.0200753	0.0959783	0.0722327	CAV1/PTPRD/S100A10/NLGN4Y/NLGN1/NLGN4X	6
BP	GO:0090218	positive regulation of lipid kinase activity	6/1133	36/18670	0.0200753	0.0959783	0.0722327	EEF1A2/FLT1/PDGFB/PDGFRA/PRKD1/PTK2	6
CC	GO:0031838	haptoglobin-hemoglobin complex	6/1188	11/19717	1.67883e-05	0.000228974	0.000175738	HBA1/HBA2/HBM/HBB/HBG2/HBQ1	6
CC	GO:0098688	parallel fiber to Purkinje cell synapse	6/1188	16/19717	0.00022399	0.00219959	0.00168818	CALB2/GRIA3/KCNJ3/SLC6A9/CADM3/CADPS2	6
CC	GO:1902711	GABA-A receptor complex	6/1188	19/19717	0.00064912	0.00514061	0.00394541	GABRA2/GABRB2/GABRB3/GABRD/GABRE/GABRG2	6
CC	GO:1902710	GABA receptor complex	6/1188	20/19717	0.000880367	0.00654939	0.00502665	GABRA2/GABRB2/GABRB3/GABRD/GABRE/GABRG2	6
MF	GO:0022851	GABA-gated chloride ion channel activity	5/1117	13/17697	0.000833361	0.0118366	0.00961971	GABRA2/GABRB2/GABRB3/GABRE/GABRG2	5
MF	GO:0015125	bile acid transmembrane transporter activity	5/1117	17/17697	0.003242	0.03396	0.0275997	CEACAM1/SLC10A2/SLCO2B1/SLCO1C1/SLC51B	5
MF	GO:0004653	polypeptide N-acetylgalactosaminyltransferase activity	5/1117	19/17697	0.00548302	0.0488805	0.0397258	GALNT5/GALNT17/GALNT13/GALNT15/GALNT18	5
MF	GO:0005242	inward rectifier potassium channel activity	5/1117	20/17697	0.00693661	0.0571717	0.0464641	KCNH2/KCNJ3/KCNJ11/KCNJ15/KCNK1	5
MF	GO:0099095	ligand-gated anion channel activity	5/1117	20/17697	0.00693661	0.0571717	0.0464641	GABRA2/GABRB2/GABRB3/GABRE/GABRG2	5
MF	GO:0015278	calcium-release channel activity	5/1117	21/17697	0.00863931	0.0646406	0.0525342	RYR2/TRPA1/MCOLN3/JPH1/MCOLN2	5
BP	GO:0048642	negative regulation of skeletal muscle tissue development	5/1133	12/18670	0.000451003	0.00537828	0.00404767	EPHB1/TLL2/TWIST1/DKK1/SIX4	5
BP	GO:0097090	presynaptic membrane organization	5/1133	12/18670	0.000451003	0.00537828	0.00404767	APOE/PTPRD/NLGN4Y/NLGN1/NLGN4X	5
BP	GO:1904862	inhibitory synapse assembly	5/1133	12/18670	0.000451003	0.00537828	0.00404767	GABRA2/GABRB2/GABRB3/GABRG2/WNT5A	5
BP	GO:2001223	negative regulation of neuron migration	5/1133	12/18670	0.000451003	0.00537828	0.00404767	COL3A1/ERBB4/CX3CL1/NRG3/NEXMIF	5
BP	GO:0007494	midgut development	5/1133	13/18670	0.000696363	0.00738341	0.00555672	ASS1/CPS1/EGFR/FOXL1/WNT5A	5
BP	GO:1902894	negative regulation of pri-miRNA transcription by RNA polymerase II	5/1133	13/18670	0.000696363	0.00738341	0.00555672	BMP4/NFATC4/NFIB/PDGFB/SOX9	5
BP	GO:2000052	positive regulation of non-canonical Wnt signaling pathway	5/1133	13/18670	0.000696363	0.00738341	0.00555672	MLLT3/SFRP1/WNT5A/DKK1/RSPO3	5
BP	GO:0051712	positive regulation of killing of cells of other organism	5/1133	14/18670	0.00102934	0.00987833	0.00743438	ARG1/IFNG/NOS2/PGLYRP1/PGLYRP4	5
BP	GO:0086069	bundle of His cell to Purkinje myocyte communication	5/1133	14/18670	0.00102934	0.00987833	0.00743438	CACNA2D1/DSP/GJA5/KCNA5/CTNNA3	5
BP	GO:0034111	negative regulation of homotypic cell-cell adhesion	5/1133	15/18670	0.00146733	0.013081	0.0098447	CEACAM1/PRKG1/C1QTNF1/CCM2L/ADAMTS18	5
BP	GO:0090494	dopamine uptake	5/1133	15/18670	0.00146733	0.013081	0.0098447	GDNF/PRKN/RAB3B/SLC6A2/SLC22A3	5
BP	GO:2000095	regulation of Wnt signaling pathway, planar cell polarity pathway	5/1133	15/18670	0.00146733	0.013081	0.0098447	MLLT3/SFRP1/SFRP2/DKK1/RSPO3	5
BP	GO:2001028	positive regulation of endothelial cell chemotaxis	5/1133	15/18670	0.00146733	0.013081	0.0098447	KDR/MET/PRKD1/LGMN/SMOC2	5
BP	GO:0001946	lymphangiogenesis	5/1133	16/18670	0.00202847	0.0170958	0.0128662	EPHA2/FOXC1/VEGFC/PDPN/CCBE1	5
BP	GO:0001977	renal system process involved in regulation of blood volume	5/1133	16/18670	0.00202847	0.0170958	0.0128662	GJA1/GJA5/PDGFB/CORO2B/CYP4F12	5
BP	GO:0002070	epithelial cell maturation	5/1133	16/18670	0.00202847	0.0170958	0.0128662	GJA1/FOXA1/HOXA5/PGR/TFCP2L1	5
BP	GO:0007158	neuron cell-cell adhesion	5/1133	16/18670	0.00202847	0.0170958	0.0128662	ASTN1/NRXN3/NLGN4Y/NLGN1/NLGN4X	5
BP	GO:0060572	morphogenesis of an epithelial bud	5/1133	16/18670	0.00202847	0.0170958	0.0128662	BMP4/GLI2/WNT5A/SULF1/SOSTDC1	5
BP	GO:0090493	catecholamine uptake	5/1133	16/18670	0.00202847	0.0170958	0.0128662	GDNF/PRKN/RAB3B/SLC6A2/SLC22A3	5
BP	GO:0006883	cellular sodium ion homeostasis	5/1133	17/18670	0.00273142	0.0209396	0.015759	ATP1A4/ATP1B2/C7/NEDD4L/TMPRSS3	5
BP	GO:0035930	corticosteroid hormone secretion	5/1133	17/18670	0.00273142	0.0209396	0.015759	AGTR1/CRH/GAL/C1QTNF1/SELENOM	5
BP	GO:0046068	cGMP metabolic process	5/1133	17/18670	0.00273142	0.0209396	0.015759	GUCY1A2/NPR1/PDE1A/RORA/PDE10A	5
BP	GO:0051709	regulation of killing of cells of other organism	5/1133	17/18670	0.00273142	0.0209396	0.015759	ARG1/IFNG/NOS2/PGLYRP1/PGLYRP4	5
BP	GO:0061298	retina vasculature development in camera-type eye	5/1133	17/18670	0.00273142	0.0209396	0.015759	COL4A1/PDGFRA/FZD4/ARHGEF15/RHOJ	5
BP	GO:1905331	negative regulation of morphogenesis of an epithelium	5/1133	17/18670	0.00273142	0.0209396	0.015759	BMP4/TBX2/WNT5A/SULF1/PHLDB2	5
BP	GO:0048739	cardiac muscle fiber development	5/1133	18/18670	0.00359507	0.0255493	0.0192283	BMP4/MYBPC2/MYH6/SGCD/MYO18B	5
BP	GO:0071625	vocalization behavior	5/1133	18/18670	0.00359507	0.0255493	0.0192283	NRXN3/NLGN4Y/SHANK2/CNTNAP2/NLGN4X	5
BP	GO:0016048	detection of temperature stimulus	5/1133	19/18670	0.00463833	0.031028	0.0233515	EPHB1/HTR2A/CXCL12/ANO1/ANO3	5
BP	GO:0036303	lymph vessel morphogenesis	5/1133	19/18670	0.00463833	0.031028	0.0233515	EPHA2/FOXC1/VEGFC/PDPN/CCBE1	5
BP	GO:0060219	camera-type eye photoreceptor cell differentiation	5/1133	19/18670	0.00463833	0.031028	0.0233515	PTN/RORB/SOX9/THRB/THY1	5
BP	GO:0071435	potassium ion export	5/1133	19/18670	0.00463833	0.031028	0.0233515	KCNA3/KCNA5/KCNH2/KCNT2/KCNE1B	5
BP	GO:0097623	potassium ion export across plasma membrane	5/1133	19/18670	0.00463833	0.031028	0.0233515	KCNA3/KCNA5/KCNH2/KCNT2/KCNE1B	5
BP	GO:0098911	regulation of ventricular cardiac muscle cell action potential	5/1133	19/18670	0.00463833	0.031028	0.0233515	CAV1/DSP/RYR2/NOS1AP/CTNNA3	5
BP	GO:0006525	arginine metabolic process	5/1133	20/18670	0.00587986	0.0379879	0.0285895	ARG1/ART4/ASS1/CPS1/NOS2	5
BP	GO:0042474	middle ear morphogenesis	5/1133	20/18670	0.00587986	0.0379879	0.0285895	NKX3-2/PRRX1/SIX1/SIX2/OSR2	5
BP	GO:0048745	smooth muscle tissue development	5/1133	20/18670	0.00587986	0.0379879	0.0285895	BMP4/COL3A1/SIX1/SOX9/ITGA8	5
BP	GO:0060216	definitive hemopoiesis	5/1133	20/18670	0.00587986	0.0379879	0.0285895	HOXA9/HOXB3/HOXB4/TAL1/TGFBR3	5
BP	GO:0098698	postsynaptic specialization assembly	5/1133	20/18670	0.00587986	0.0379879	0.0285895	NTRK3/PTPRD/PTPRS/NLGN1/SHANK2	5
BP	GO:0015874	norepinephrine transport	5/1133	21/18670	0.00733791	0.0441029	0.0331916	ADRA2C/CRH/GHSR/FFAR3/SLC6A2	5
BP	GO:0048245	eosinophil chemotaxis	5/1133	21/18670	0.00733791	0.0441029	0.0331916	CCL1/CCL8/CCL16/CCL23/CX3CL1	5
BP	GO:0050951	sensory perception of temperature stimulus	5/1133	21/18670	0.00733791	0.0441029	0.0331916	EPHB1/HTR2A/CXCL12/TRPA1/ANO1	5
BP	GO:0140058	neuron projection arborization	5/1133	21/18670	0.00733791	0.0441029	0.0331916	PTN/WNT5A/FZD4/NLGN1/ZNF365	5
BP	GO:1904469	positive regulation of tumor necrosis factor secretion	5/1133	21/18670	0.00733791	0.0441029	0.0331916	IFNG/MMP8/ORM1/WNT5A/AKAP12	5
BP	GO:2000810	regulation of bicellular tight junction assembly	5/1133	21/18670	0.00733791	0.0441029	0.0331916	EPHA2/GJA1/SNAI2/TJP1/OCLN	5
BP	GO:0030878	thyroid gland development	5/1133	22/18670	0.00903009	0.0524164	0.0394483	HOXA3/HOXA5/HOXB3/SIX1/THRB	5
BP	GO:0048714	positive regulation of oligodendrocyte differentiation	5/1133	23/18670	0.0109732	0.0610668	0.0459585	PTN/OLIG2/ZNF365/TENM4/IL34	5
BP	GO:0061436	establishment of skin barrier	5/1133	23/18670	0.0109732	0.0610668	0.0459585	KRT1/MET/GRHL1/CYP26B1/FA2H	5
BP	GO:0071305	cellular response to vitamin D	5/1133	23/18670	0.0109732	0.0610668	0.0459585	TNC/PHEX/PTN/SFRP1/SNAI2	5
BP	GO:1900746	regulation of vascular endothelial growth factor signaling pathway	5/1133	23/18670	0.0109732	0.0610668	0.0459585	DCN/ROBO1/SMOC2/CCBE1/DAB2IP	5
BP	GO:0003181	atrioventricular valve morphogenesis	5/1133	24/18670	0.0131831	0.0712539	0.0536253	SLIT3/TWIST1/OLFM1/HEY1/HEY2	5
BP	GO:0021511	spinal cord patterning	5/1133	24/18670	0.0131831	0.0712539	0.0536253	ASCL1/GLI2/RELN/SOX1/CHRD	5
BP	GO:0090103	cochlea morphogenesis	5/1133	24/18670	0.0131831	0.0712539	0.0536253	FRZB/GLI2/SIX1/SOX9/WNT5A	5
BP	GO:1902547	regulation of cellular response to vascular endothelial growth factor stimulus	5/1133	24/18670	0.0131831	0.0712539	0.0536253	DCN/ROBO1/SMOC2/CCBE1/DAB2IP	5
BP	GO:2001026	regulation of endothelial cell chemotaxis	5/1133	24/18670	0.0131831	0.0712539	0.0536253	KDR/MET/PRKD1/LGMN/SMOC2	5
BP	GO:0007214	gamma-aminobutyric acid signaling pathway	5/1133	25/18670	0.0156746	0.0801874	0.0603486	GABRA2/GABRB2/GABRB3/GABRE/GABRG2	5
BP	GO:0014829	vascular smooth muscle contraction	5/1133	25/18670	0.0156746	0.0801874	0.0603486	CHRM3/EDN3/EDNRA/HTR2A/ARHGAP42	5
BP	GO:0051894	positive regulation of focal adhesion assembly	5/1133	25/18670	0.0156746	0.0801874	0.0603486	COL16A1/KDR/S100A10/SFRP1/THY1	5
BP	GO:0072677	eosinophil migration	5/1133	25/18670	0.0156746	0.0801874	0.0603486	CCL1/CCL8/CCL16/CCL23/CX3CL1	5
BP	GO:2000311	regulation of AMPA receptor activity	5/1133	25/18670	0.0156746	0.0801874	0.0603486	RELN/NLGN1/SHANK2/CACNG4/SHISA7	5
BP	GO:0022011	myelination in peripheral nervous system	5/1133	26/18670	0.0184612	0.0903137	0.0679696	NTRK2/NTRK3/ADGRG6/FA2H/SH3TC2	5
BP	GO:0030318	melanocyte differentiation	5/1133	26/18670	0.0184612	0.0903137	0.0679696	EDN3/ENPP1/TYRP1/ADAMTS9/ADAMTS20	5
BP	GO:0032292	peripheral nervous system axon ensheathment	5/1133	26/18670	0.0184612	0.0903137	0.0679696	NTRK2/NTRK3/ADGRG6/FA2H/SH3TC2	5
BP	GO:0032800	receptor biosynthetic process	5/1133	26/18670	0.0184612	0.0903137	0.0679696	ACHE/HOXA5/IFNG/IL10/ADIPOQ	5
BP	GO:0033561	regulation of water loss via skin	5/1133	26/18670	0.0184612	0.0903137	0.0679696	KRT1/MET/GRHL1/CYP26B1/FA2H	5
BP	GO:0043567	regulation of insulin-like growth factor receptor signaling pathway	5/1133	26/18670	0.0184612	0.0903137	0.0679696	BMP5/GHSR/IGFBP3/IGFBP4/IGFBP5	5
BP	GO:0060037	pharyngeal system development	5/1133	26/18670	0.0184612	0.0903137	0.0679696	BMP4/BMP5/SIX1/SIX4/ADGRF5	5
BP	GO:0060669	embryonic placenta morphogenesis	5/1133	26/18670	0.0184612	0.0903137	0.0679696	BMP5/IGF2/IL10/WNT7B/RSPO3	5
BP	GO:1901018	positive regulation of potassium ion transmembrane transporter activity	5/1133	26/18670	0.0184612	0.0903137	0.0679696	ANK2/ATP1B2/NOS1AP/GAL/LRRC38	5
CC	GO:0005614	interstitial matrix	5/1188	12/19717	0.00043642	0.00369452	0.00283554	TNC/VIT/SMOC2/NAV2/EGFLAM	5
CC	GO:0043083	synaptic cleft	5/1188	14/19717	0.00099678	0.00730476	0.0056064	ACHE/APOE/ADGRB3/CDH8/C1QL1	5
CC	GO:0044305	calyx of Held	5/1188	24/19717	0.0128111	0.0599074	0.0459788	HTR1B/KCNA2/KCNA3/TSPOAP1/CPLX1	5
CC	GO:0032281	AMPA glutamate receptor complex	5/1188	27/19717	0.0209686	0.090312	0.0693144	DLG3/GRIA3/CACNG4/OLFM3/SHISA7	5
MF	GO:0070700	BMP receptor binding	4/1117	11/17697	0.0036394	0.0363073	0.0295074	BMP3/BMP4/BMP5/CDH5	4
MF	GO:0008195	phosphatidate phosphatase activity	4/1117	13/17697	0.00712437	0.0571717	0.0464641	PLPP3/PLPPR4/LPIN3/PLPP4	4
MF	GO:0070679	inositol 1,4,5 trisphosphate binding	4/1117	13/17697	0.00712437	0.0571717	0.0464641	TRPC1/TRPC3/TRPC6/RPH3A	4
MF	GO:0005283	amino acid:sodium symporter activity	4/1117	14/17697	0.00948239	0.0697039	0.0566492	SLC1A1/SLC6A1/SLC6A8/SLC6A9	4
MF	GO:0015271	outward rectifier potassium channel activity	4/1117	15/17697	0.0122946	0.0844499	0.0686335	KCNA2/KCNA3/KCNA5/KCNT2	4
MF	GO:0086008	voltage-gated potassium channel activity involved in cardiac muscle cell action potential repolarization	4/1117	15/17697	0.0122946	0.0844499	0.0686335	KCNA5/KCNH2/KCNJ3/KCNE1B	4
MF	GO:0005237	inhibitory extracellular ligand-gated ion channel activity	4/1117	16/17697	0.0155886	0.0989642	0.0804294	GABRA2/GABRB2/GABRE/GABRG2	4
MF	GO:0015347	sodium-independent organic anion transmembrane transporter activity	4/1117	16/17697	0.0155886	0.0989642	0.0804294	SLCO2A1/SLC22A7/SLCO2B1/SLCO1C1	4
MF	GO:0016641	oxidoreductase activity, acting on the CH-NH2 group of donors, oxygen as acceptor	4/1117	16/17697	0.0155886	0.0989642	0.0804294	MAOA/MAOB/VCAM1/LOXL4	4
MF	GO:0043395	heparan sulfate proteoglycan binding	4/1117	16/17697	0.0155886	0.0989642	0.0804294	APOE/PTPRS/FST/HPSE2	4
MF	GO:0071837	HMG box domain binding	4/1117	16/17697	0.0155886	0.0989642	0.0804294	DLX5/HOXA3/PRRX1/OLIG2	4
BP	GO:0002934	desmosome organization	4/1133	10/18670	0.00210794	0.0174302	0.0131179	DSP/SNAI2/GRHL1/PERP	4
BP	GO:0038063	collagen-activated tyrosine kinase receptor signaling pathway	4/1133	10/18670	0.00210794	0.0174302	0.0131179	COL1A1/COL4A1/COL4A2/DDR2	4
BP	GO:0060513	prostatic bud formation	4/1133	10/18670	0.00210794	0.0174302	0.0131179	BMP4/GLI2/WNT5A/SULF1	4
BP	GO:0061299	retina vasculature morphogenesis in camera-type eye	4/1133	10/18670	0.00210794	0.0174302	0.0131179	COL4A1/FZD4/ARHGEF15/RHOJ	4
BP	GO:0070099	regulation of chemokine-mediated signaling pathway	4/1133	10/18670	0.00210794	0.0174302	0.0131179	ROBO1/SLIT3/SLIT2/PADI2	4
BP	GO:0086070	SA node cell to atrial cardiac muscle cell communication	4/1133	10/18670	0.00210794	0.0174302	0.0131179	ANK2/GJA5/KCNA5/RYR2	4
BP	GO:0097105	presynaptic membrane assembly	4/1133	10/18670	0.00210794	0.0174302	0.0131179	PTPRD/NLGN4Y/NLGN1/NLGN4X	4
BP	GO:2001214	positive regulation of vasculogenesis	4/1133	10/18670	0.00210794	0.0174302	0.0131179	CEACAM1/KDR/RAMP2/TMEM100	4
BP	GO:0003093	regulation of glomerular filtration	4/1133	11/18670	0.00315424	0.0231624	0.0174319	GJA1/GJA5/PDGFB/CORO2B	4
BP	GO:0010269	response to selenium ion	4/1133	11/18670	0.00315424	0.0231624	0.0174319	APOB/ARG1/MAOB/SELENOM	4
BP	GO:0016264	gap junction assembly	4/1133	11/18670	0.00315424	0.0231624	0.0174319	CAV1/GJA1/GJA5/GJB2	4
BP	GO:0051583	dopamine uptake involved in synaptic transmission	4/1133	11/18670	0.00315424	0.0231624	0.0174319	GDNF/PRKN/RAB3B/SLC6A2	4
BP	GO:0051934	catecholamine uptake involved in synaptic transmission	4/1133	11/18670	0.00315424	0.0231624	0.0174319	GDNF/PRKN/RAB3B/SLC6A2	4
BP	GO:0060272	embryonic skeletal joint morphogenesis	4/1133	11/18670	0.00315424	0.0231624	0.0174319	BMP4/COL2A1/HOXA11/OSR2	4
BP	GO:0060433	bronchus development	4/1133	11/18670	0.00315424	0.0231624	0.0174319	BMP4/HOXA5/SOX9/WNT7B	4
BP	GO:0060439	trachea morphogenesis	4/1133	11/18670	0.00315424	0.0231624	0.0174319	BMP4/HOXA5/WNT7B/RSPO2	4
BP	GO:0061307	cardiac neural crest cell differentiation involved in heart development	4/1133	11/18670	0.00315424	0.0231624	0.0174319	BMP4/PITX2/TWIST1/SEMA3C	4
BP	GO:0061308	cardiac neural crest cell development involved in heart development	4/1133	11/18670	0.00315424	0.0231624	0.0174319	BMP4/PITX2/TWIST1/SEMA3C	4
BP	GO:0006828	manganese ion transport	4/1133	12/18670	0.00450586	0.030439	0.0229082	TRPC1/TRPC3/TRPC6/SLC30A10	4
BP	GO:0010960	magnesium ion homeostasis	4/1133	12/18670	0.00450586	0.030439	0.0229082	EDN3/EGFR/KEL/XK	4
BP	GO:0014831	gastro-intestinal system smooth muscle contraction	4/1133	12/18670	0.00450586	0.030439	0.0229082	GHSR/NMU/SULF1/SPX	4
BP	GO:0042659	regulation of cell fate specification	4/1133	12/18670	0.00450586	0.030439	0.0229082	SFRP2/DKK1/ESRP1/SOX17	4
BP	GO:0072578	neurotransmitter-gated ion channel clustering	4/1133	12/18670	0.00450586	0.030439	0.0229082	APOE/RELN/NLGN1/SHISA7	4
BP	GO:0090331	negative regulation of platelet aggregation	4/1133	12/18670	0.00450586	0.030439	0.0229082	CEACAM1/PRKG1/C1QTNF1/ADAMTS18	4
BP	GO:0010454	negative regulation of cell fate commitment	4/1133	13/18670	0.00619897	0.0390671	0.0294017	SFRP2/DKK1/SOSTDC1/SOX17	4
BP	GO:0031115	negative regulation of microtubule polymerization	4/1133	13/18670	0.00619897	0.0390671	0.0294017	CDH5/MAP2/TUBB4A/STMN2	4
BP	GO:0032536	regulation of cell projection size	4/1133	13/18670	0.00619897	0.0390671	0.0294017	KEL/NEFL/WNT7B/XK	4
BP	GO:0038065	collagen-activated signaling pathway	4/1133	13/18670	0.00619897	0.0390671	0.0294017	COL1A1/COL4A1/COL4A2/DDR2	4
BP	GO:0043116	negative regulation of vascular permeability	4/1133	13/18670	0.00619897	0.0390671	0.0294017	CEACAM1/SLIT2/AKAP12/RAMP2	4
BP	GO:0043568	positive regulation of insulin-like growth factor receptor signaling pathway	4/1133	13/18670	0.00619897	0.0390671	0.0294017	GHSR/IGFBP3/IGFBP4/IGFBP5	4
BP	GO:0048715	negative regulation of oligodendrocyte differentiation	4/1133	13/18670	0.00619897	0.0390671	0.0294017	ID4/DAAM2/TMEM98/HES5	4
BP	GO:0060347	heart trabecula formation	4/1133	13/18670	0.00619897	0.0390671	0.0294017	TGFBR3/HEY1/HEY2/ADGRG6	4
BP	GO:0060601	lateral sprouting from an epithelium	4/1133	13/18670	0.00619897	0.0390671	0.0294017	BMP4/GLI2/WNT5A/SULF1	4
BP	GO:0070208	protein heterotrimerization	4/1133	13/18670	0.00619897	0.0390671	0.0294017	COL1A1/COL1A2/ADIPOQ/C1QTNF1	4
BP	GO:0003128	heart field specification	4/1133	14/18670	0.00826681	0.048739	0.0366807	BMP4/ROBO1/ROBO2/DKK1	4
BP	GO:0034370	triglyceride-rich lipoprotein particle remodeling	4/1133	14/18670	0.00826681	0.048739	0.0366807	APOB/APOE/LIPG/GPIHBP1	4
BP	GO:0060911	cardiac cell fate commitment	4/1133	14/18670	0.00826681	0.048739	0.0366807	TBX3/DKK1/TENM4/SOX17	4
BP	GO:0072498	embryonic skeletal joint development	4/1133	14/18670	0.00826681	0.048739	0.0366807	BMP4/COL2A1/HOXA11/OSR2	4
BP	GO:0090128	regulation of synapse maturation	4/1133	14/18670	0.00826681	0.048739	0.0366807	NFATC4/RELN/ARHGEF15/DAB2IP	4
BP	GO:1902043	positive regulation of extrinsic apoptotic signaling pathway via death domain receptors	4/1133	14/18670	0.00826681	0.048739	0.0366807	MAL/SFRP1/TIMP3/ZSWIM2	4
BP	GO:0007351	tripartite regional subdivision	4/1133	15/18670	0.0107394	0.0604046	0.0454601	HOXD8/TBX3/WNT5A/TDRD5	4
BP	GO:0008595	anterior/posterior axis specification, embryo	4/1133	15/18670	0.0107394	0.0604046	0.0454601	HOXD8/TBX3/WNT5A/TDRD5	4
BP	GO:0033604	negative regulation of catecholamine secretion	4/1133	15/18670	0.0107394	0.0604046	0.0454601	ADRA2C/CNR1/CRH/GHSR	4
BP	GO:0043584	nose development	4/1133	15/18670	0.0107394	0.0604046	0.0454601	ASCL1/DLX5/SIX1/SIX4	4
BP	GO:0044406	adhesion of symbiont to host	4/1133	15/18670	0.0107394	0.0604046	0.0454601	INHBB/LTF/CLEC4M/LRRC15	4
BP	GO:0050961	detection of temperature stimulus involved in sensory perception	4/1133	15/18670	0.0107394	0.0604046	0.0454601	EPHB1/HTR2A/CXCL12/ANO1	4
BP	GO:0050965	detection of temperature stimulus involved in sensory perception of pain	4/1133	15/18670	0.0107394	0.0604046	0.0454601	EPHB1/HTR2A/CXCL12/ANO1	4
BP	GO:0060026	convergent extension	4/1133	15/18670	0.0107394	0.0604046	0.0454601	FRZB/SFRP1/SFRP2/WNT5A	4
BP	GO:0099558	maintenance of synapse structure	4/1133	15/18670	0.0107394	0.0604046	0.0454601	ADGRB3/DLG3/C1QL1/PCLO	4
BP	GO:1901841	regulation of high voltage-gated calcium channel activity	4/1133	15/18670	0.0107394	0.0604046	0.0454601	CACNA2D1/FGF14/GEM/NOS1AP	4
BP	GO:0014061	regulation of norepinephrine secretion	4/1133	16/18670	0.013643	0.0719643	0.05416	ADRA2C/CRH/GHSR/FFAR3	4
BP	GO:0043217	myelin maintenance	4/1133	16/18670	0.013643	0.0719643	0.05416	ABCD2/EPB41L3/FA2H/SH3TC2	4
BP	GO:0043252	sodium-independent organic anion transport	4/1133	16/18670	0.013643	0.0719643	0.05416	SLC16A2/SLCO2A1/SLCO2B1/SLCO1C1	4
BP	GO:0048012	hepatocyte growth factor receptor signaling pathway	4/1133	16/18670	0.013643	0.0719643	0.05416	MET/MST1R/BCAR1/ESM1	4
BP	GO:0061548	ganglion development	4/1133	16/18670	0.013643	0.0719643	0.05416	ASCL1/SIX1/UNC5C/SIX4	4
BP	GO:0072189	ureter development	4/1133	16/18670	0.013643	0.0719643	0.05416	BMP4/NFIA/SIX1/SOX9	4
BP	GO:0072224	metanephric glomerulus development	4/1133	16/18670	0.013643	0.0719643	0.05416	PDGFB/PDGFRA/ADIPOQ/LGR4	4
BP	GO:0072488	ammonium transmembrane transport	4/1133	16/18670	0.013643	0.0719643	0.05416	RHAG/RHCE/RHD/RHCG	4
BP	GO:0097091	synaptic vesicle clustering	4/1133	16/18670	0.013643	0.0719643	0.05416	SYN3/NLGN1/PCDH17/PCLO	4
BP	GO:2000846	regulation of corticosteroid hormone secretion	4/1133	16/18670	0.013643	0.0719643	0.05416	AGTR1/CRH/GAL/C1QTNF1	4
BP	GO:0007379	segment specification	4/1133	17/18670	0.0170004	0.0852554	0.0641627	MLLT3/COBL/IRX2/HES5	4
BP	GO:0017121	phospholipid scrambling	4/1133	17/18670	0.0170004	0.0852554	0.0641627	SLC4A1/PLSCR4/ANO3/XKR6	4
BP	GO:0042249	establishment of planar polarity of embryonic epithelium	4/1133	17/18670	0.0170004	0.0852554	0.0641627	FOXF2/SFRP1/SFRP2/WNT5A	4
BP	GO:0048243	norepinephrine secretion	4/1133	17/18670	0.0170004	0.0852554	0.0641627	ADRA2C/CRH/GHSR/FFAR3	4
BP	GO:0048521	negative regulation of behavior	4/1133	17/18670	0.0170004	0.0852554	0.0641627	CRH/GHSR/MC4R/NMU	4
BP	GO:0061323	cell proliferation involved in heart morphogenesis	4/1133	17/18670	0.0170004	0.0852554	0.0641627	BMP4/PITX2/SIX1/SOX9	4
BP	GO:0097107	postsynaptic density assembly	4/1133	17/18670	0.0170004	0.0852554	0.0641627	NTRK3/PTPRD/PTPRS/SHANK2	4
BP	GO:0099509	regulation of presynaptic cytosolic calcium ion concentration	4/1133	17/18670	0.0170004	0.0852554	0.0641627	CALB2/CNR1/HTR1B/TSPOAP1	4
BP	GO:1904948	midbrain dopaminergic neuron differentiation	4/1133	17/18670	0.0170004	0.0852554	0.0641627	SFRP1/SFRP2/WNT5A/DKK1	4
BP	GO:2000811	negative regulation of anoikis	4/1133	17/18670	0.0170004	0.0852554	0.0641627	CAV1/NTRK2/PTK2/SNAI2	4
BP	GO:0007597	blood coagulation, intrinsic pathway	4/1133	18/18670	0.0208305	0.0986914	0.0742746	A2M/F11/GP5/KLKB1	4
BP	GO:0048339	paraxial mesoderm development	4/1133	18/18670	0.0208305	0.0986914	0.0742746	FOXC1/WNT5A/YAP1/DLL3	4
BP	GO:0071605	monocyte chemotactic protein-1 production	4/1133	18/18670	0.0208305	0.0986914	0.0742746	APOD/TWIST1/ADIPOQ/MCOLN2	4
BP	GO:0071637	regulation of monocyte chemotactic protein-1 production	4/1133	18/18670	0.0208305	0.0986914	0.0742746	APOD/TWIST1/ADIPOQ/MCOLN2	4
BP	GO:0072077	renal vesicle morphogenesis	4/1133	18/18670	0.0208305	0.0986914	0.0742746	BMP4/GDNF/SOX9/SIX2	4
BP	GO:2000047	regulation of cell-cell adhesion mediated by cadherin	4/1133	18/18670	0.0208305	0.0986914	0.0742746	FOXA1/WNT5A/ADAM19/NEXMIF	4
CC	GO:0089717	spanning component of membrane	4/1188	12/19717	0.0043919	0.0253697	0.0194712	NLGN4Y/NLGN1/AJAP1/NLGN4X	4
CC	GO:0060077	inhibitory synapse	4/1188	17/19717	0.0165986	0.0747697	0.0573857	GAD1/NLGN4Y/NLGN4X/IGSF21	4
CC	GO:0031527	filopodium membrane	4/1188	18/19717	0.0203449	0.0884014	0.067848	MYO10/PDPN/SYNE2/ANTXR1	4
BP	GO:0001820	serotonin secretion	3/1133	10/18670	0.0193858	0.0934188	0.0703065	CRH/HTR1B/MAOB	3
BP	GO:0010739	positive regulation of protein kinase A signaling	3/1133	10/18670	0.0193858	0.0934188	0.0703065	ADIPOQ/AKAP12/TCIM	3
BP	GO:0010749	regulation of nitric oxide mediated signal transduction	3/1133	10/18670	0.0193858	0.0934188	0.0703065	EGFR/GUCY1A2/NOS1AP	3
BP	GO:0033483	gas homeostasis	3/1133	10/18670	0.0193858	0.0934188	0.0703065	ALAS2/CAV1/WNT7B	3
BP	GO:0034447	very-low-density lipoprotein particle clearance	3/1133	10/18670	0.0193858	0.0934188	0.0703065	APOB/APOC1/APOE	3
BP	GO:0048570	notochord morphogenesis	3/1133	10/18670	0.0193858	0.0934188	0.0703065	EPHA2/GLI2/WNT5A	3
BP	GO:0051124	synaptic growth at neuromuscular junction	3/1133	10/18670	0.0193858	0.0934188	0.0703065	SIX1/SHANK2/SIX4	3
BP	GO:0061140	lung secretory cell differentiation	3/1133	10/18670	0.0193858	0.0934188	0.0703065	ASCL1/HOXA5/NFIB	3
BP	GO:1904338	regulation of dopaminergic neuron differentiation	3/1133	10/18670	0.0193858	0.0934188	0.0703065	SFRP1/SFRP2/DKK1	3
BP	GO:2000035	regulation of stem cell division	3/1133	10/18670	0.0193858	0.0934188	0.0703065	NAP1L2/SFRP2/SOX17	3
BP	GO:2000049	positive regulation of cell-cell adhesion mediated by cadherin	3/1133	10/18670	0.0193858	0.0934188	0.0703065	FOXA1/WNT5A/ADAM19	3
BP	GO:2000833	positive regulation of steroid hormone secretion	3/1133	10/18670	0.0193858	0.0934188	0.0703065	CRH/GAL/C1QTNF1	3
CC	GO:0005916	fascia adherens	3/1188	10/19717	0.0190195	0.0841314	0.0645708	DSP/GJA1/CTNNA3	3
CC	GO:0044224	juxtaparanode region of axon	3/1188	10/19717	0.0190195	0.0841314	0.0645708	KCNA2/EPB41L3/CNTNAP2	3
