# Supplementary material for: Low expression of the metabolism-related gene SLC25A21 predicts unfavourable prognosis in patients with acute myeloid leukaemia
Source: Front Genet. 2022 Sep 30;13:970316. doi: 10.3389/fgene.2022.970316 (PMC9562002; doi:10.3389/fgene.2022.970316)
Supplement: Supplementary file 3 [file Table3.xlsx]

## Sheet: Sheet1
AML	Gender	Age	FAB classification	Karyotype
1	M	73	M2a	46,xy,del(5)(q13q33)[3]
2	F	60	M5b	NA
3	F	43	M6	NA
4	F	22	M5b	46，xx[3]
5	F	49	M2b	NA
6	M	58	AML	NA
7	F	58	M2b	44~46,xx,-x,t(8;21;?)(q22;q22;?),-8,-13,-14[cp9]
8	F	72	M2	Normal
9	M	62	M5	NA
10	M	62	M5	NA
11	F	47	M2a	NA
12	F	38	M2a	46,xx,15ps+[10]
13	M	42	M5b	47，XX,+8[6]
14	F	41	M5b	Normal
15	M	52	M5	Normal
16	M	59	M2b	NA
17	F	32	M2	47，XX+?4[3]/47，XX,+mar[3]/46,XX,del(9)(q21)[1]/46,XX[13]
18	M	41	M1	Normal
19	M	36	M5b	XY，t(10;11)(p23;q23)
20	M	19	M2a	47，XY,+8
