# Supplementary material for: Low expression of the metabolism-related gene SLC25A21 predicts unfavourable prognosis in patients with acute myeloid leukaemia
Source: Front Genet. 2022 Sep 30;13:970316. doi: 10.3389/fgene.2022.970316 (PMC9562002; doi:10.3389/fgene.2022.970316)
Supplement: Supplementary file 6 [file Table4.XLSX]

## Sheet: Sheet1
Primer	Sequence (5’ to 3’)
SLC25A21-Forward primer:	ATTTGGGATTGGTCTTCT
SLC25A21-Reverse primer:	GACTGTTGCCATTGTTTT
GAPDH-Forward primer:	GAAGGTGAAGGTCGGAGTC
GAPDH-Reverse primer:	GAAGATGGTGATGGGATTTC
